# Supplementary material for: Video captioning based on vision transformer and reinforcement learning
Source: PeerJ Comput Sci. 2022 Mar 16;8:e916. doi: 10.7717/peerj-cs.916 (PMC9044334; doi:10.7717/peerj-cs.916)
Supplement: Supplemental Information 1 — The model includes three parts: feature extraction, video captioning generation, reward mechanism (Policy Gradient). L is the number of transformer encoder blocks in the encoder of the model, ws is the word sequence generated by the model, and r(*) is the reinforcement learning reward function [file peerj-cs-08-916-s001.vsdx]

Archive with 39 entries (39 files):
- [Content_Types].xml
- _rels/.rels
- visio/masters/masters.xml
- visio/masters/_rels/masters.xml.rels
- visio/pages/pages.xml
- visio/pages/_rels/pages.xml.rels
- visio/document.xml
- visio/_rels/document.xml.rels
- visio/masters/master1.xml
- visio/masters/master2.xml
- visio/masters/master3.xml
- visio/masters/master4.xml
- visio/masters/master5.xml
- visio/masters/master6.xml
- visio/pages/page1.xml
- visio/pages/_rels/page1.xml.rels
- visio/windows.xml
- visio/embeddings/oleObject1.bin
- visio/media/image1.emf
- visio/media/image2.jpeg
- visio/embeddings/oleObject2.bin
- visio/media/image3.emf
- visio/media/image4.jpeg
- visio/embeddings/oleObject3.bin
- visio/media/image9.jpeg
- visio/media/image10.jpeg
- docProps/thumbnail.emf
- visio/media/image5.emf
- visio/embeddings/oleObject4.bin
- visio/media/image7.emf
- visio/media/image8.jpeg
- visio/embeddings/_rels/oleObject1.bin.rels
- visio/embeddings/_rels/oleObject2.bin.rels
- visio/embeddings/_rels/oleObject3.bin.rels
- visio/embeddings/_rels/oleObject4.bin.rels
- visio/media/image6.jpeg
- docProps/core.xml
- docProps/app.xml
- docProps/custom.xml
