# Supplementary material for: Video captioning based on vision transformer and reinforcement learning
Source: PeerJ Comput Sci. 2022 Mar 16;8:e916. doi: 10.7717/peerj-cs.916 (PMC9044334; doi:10.7717/peerj-cs.916)
Supplement: Supplemental Information 1 — The model includes three parts: feature extraction, video captioning generation, reward mechanism (Policy Gradient). L is the number of transformer encoder blocks in the encoder of the model, ws is the word sequence generated by the model, and r(*) is the reinforcement learning reward function [file peerj-cs-08-916-s001.vsdx › docProps/app.xml]

<?xml version="1.0" encoding="UTF-8" standalone="yes"?>
<Properties xmlns="http://schemas.openxmlformats.org/officeDocument/2006/extended-properties" xmlns:vt="http://schemas.openxmlformats.org/officeDocument/2006/docPropsVTypes"><Template>C:\Program Files (x86)\Microsoft Office\Root\Office16\visio content\2052\EPC_M.vstx</Template><Application>Microsoft Visio</Application><ScaleCrop>false</ScaleCrop><HeadingPairs><vt:vector size="4" baseType="variant"><vt:variant><vt:lpstr>页</vt:lpstr></vt:variant><vt:variant><vt:i4>1</vt:i4></vt:variant><vt:variant><vt:lpstr>主控形状</vt:lpstr></vt:variant><vt:variant><vt:i4>6</vt:i4></vt:variant></vt:vector></HeadingPairs><TitlesOfParts><vt:vector size="7" baseType="lpstr"><vt:lpstr>页-1</vt:lpstr><vt:lpstr>正方形</vt:lpstr><vt:lpstr>矩形</vt:lpstr><vt:lpstr>动态连接线</vt:lpstr><vt:lpstr>圆角矩形</vt:lpstr><vt:lpstr>椭圆形</vt:lpstr><vt:lpstr>圆形</vt:lpstr></vt:vector></TitlesOfParts><Manager></Manager><Company></Company><LinksUpToDate>false</LinksUpToDate><SharedDoc>false</SharedDoc><HyperlinkBase></HyperlinkBase><HyperlinksChanged>false</HyperlinksChanged><AppVersion>16.0000</AppVersion></Properties>
