# Supplementary material for: Video captioning based on vision transformer and reinforcement learning
Source: PeerJ Comput Sci. 2022 Mar 16;8:e916. doi: 10.7717/peerj-cs.916 (PMC9044334; doi:10.7717/peerj-cs.916)
Supplement: Supplemental Information 1 — The model includes three parts: feature extraction, video captioning generation, reward mechanism (Policy Gradient). L is the number of transformer encoder blocks in the encoder of the model, ws is the word sequence generated by the model, and r(*) is the reinforcement learning reward function [file peerj-cs-08-916-s001.vsdx › docProps/core.xml]

<?xml version="1.0" encoding="UTF-8" standalone="yes"?>
<cp:coreProperties xmlns:cp="http://schemas.openxmlformats.org/package/2006/metadata/core-properties" xmlns:dc="http://purl.org/dc/elements/1.1/" xmlns:dcterms="http://purl.org/dc/terms/" xmlns:dcmitype="http://purl.org/dc/dcmitype/" xmlns:xsi="http://www.w3.org/2001/XMLSchema-instance"><dc:title></dc:title><dc:subject></dc:subject><dc:creator>陈 志文</dc:creator><cp:keywords></cp:keywords><dc:description></dc:description><cp:lastModifiedBy>陈 志文</cp:lastModifiedBy><cp:lastPrinted>2021-09-08T04:06:22Z</cp:lastPrinted><dcterms:created xsi:type="dcterms:W3CDTF">2021-09-08T04:06:22Z</dcterms:created><dcterms:modified xsi:type="dcterms:W3CDTF">2021-11-08T15:19:44Z</dcterms:modified><cp:category></cp:category><dc:language>zh-CN</dc:language></cp:coreProperties>
