# Supplementary material for: Video captioning based on vision transformer and reinforcement learning
Source: PeerJ Comput Sci. 2022 Mar 16;8:e916. doi: 10.7717/peerj-cs.916 (PMC9044334; doi:10.7717/peerj-cs.916)
Supplement: Supplemental Information 1 — The model includes three parts: feature extraction, video captioning generation, reward mechanism (Policy Gradient). L is the number of transformer encoder blocks in the encoder of the model, ws is the word sequence generated by the model, and r(*) is the reinforcement learning reward function [file peerj-cs-08-916-s001.vsdx › visio/masters/_rels/masters.xml.rels]

<?xml version="1.0" encoding="UTF-8" standalone="yes"?>
<Relationships xmlns="http://schemas.openxmlformats.org/package/2006/relationships"><Relationship Id="rId3" Type="http://schemas.microsoft.com/visio/2010/relationships/master" Target="master3.xml"/><Relationship Id="rId2" Type="http://schemas.microsoft.com/visio/2010/relationships/master" Target="master2.xml"/><Relationship Id="rId1" Type="http://schemas.microsoft.com/visio/2010/relationships/master" Target="master1.xml"/><Relationship Id="rId6" Type="http://schemas.microsoft.com/visio/2010/relationships/master" Target="master6.xml"/><Relationship Id="rId5" Type="http://schemas.microsoft.com/visio/2010/relationships/master" Target="master5.xml"/><Relationship Id="rId4" Type="http://schemas.microsoft.com/visio/2010/relationships/master" Target="master4.xml"/></Relationships>
