# Supplementary material for: Video captioning based on vision transformer and reinforcement learning
Source: PeerJ Comput Sci. 2022 Mar 16;8:e916. doi: 10.7717/peerj-cs.916 (PMC9044334; doi:10.7717/peerj-cs.916)
Supplement: Supplemental Information 1 — The model includes three parts: feature extraction, video captioning generation, reward mechanism (Policy Gradient). L is the number of transformer encoder blocks in the encoder of the model, ws is the word sequence generated by the model, and r(*) is the reinforcement learning reward function [file peerj-cs-08-916-s001.vsdx › visio/masters/master2.xml]

<?xml version='1.0' encoding='utf-8' ?>
<MasterContents xmlns='http://schemas.microsoft.com/office/visio/2012/main' xmlns:r='http://schemas.openxmlformats.org/officeDocument/2006/relationships' xml:space='preserve'><Shapes><Shape ID='5' Type='Shape' LineStyle='3' FillStyle='3' TextStyle='3'><Cell N='PinX' V='1.968503954842335' U='MM'/><Cell N='PinY' V='1.968503920581397' U='MM'/><Cell N='Width' V='1.574803149606299' U='MM'/><Cell N='Height' V='1.181102362204724' U='MM'/><Cell N='LocPinX' V='0.7874015748031495' U='MM' F='Width*0.5'/><Cell N='LocPinY' V='0.5905511811023622' U='MM' F='Height*0.5'/><Cell N='Angle' V='0' U='DEG'/><Cell N='FlipX' V='0'/><Cell N='FlipY' V='0'/><Cell N='ResizeMode' V='0'/><Cell N='EventDblClick' V='0' F='OPENTEXTWIN()'/><Cell N='HelpTopic' V='Vis_Sba.chm!#45752'/><Cell N='Copyright' V='Copyright (c) 2012 Microsoft Corporation.  All rights reserved.'/><Cell N='ShapeSplit' V='1'/><Cell N='LineWeight' V='0.003333333333333333' U='PT' F='THEMEVAL("LineWeight",0.24PT)'/><Cell N='QuickStyleType' V='2'/><Section N='Connection'><Row T='Connection' IX='0'><Cell N='X' V='0.7874015748031495' U='MM' F='Width*0.5'/><Cell N='Y' V='0' U='MM' F='Height*0'/><Cell N='DirX' V='0'/><Cell N='DirY' V='1'/><Cell N='Type' V='0' F='No Formula'/><Cell N='AutoGen' V='0' F='No Formula'/><Cell N='Prompt' V='' F='No Formula'/></Row><Row T='Connection' IX='1'><Cell N='X' V='1.574803149606299' U='MM' F='Width*1'/><Cell N='Y' V='0.5905511811023622' U='MM' F='Height*0.5'/><Cell N='DirX' V='-1'/><Cell N='DirY' V='0'/><Cell N='Type' V='0' F='No Formula'/><Cell N='AutoGen' V='0' F='No Formula'/><Cell N='Prompt' V='' F='No Formula'/></Row><Row T='Connection' IX='2'><Cell N='X' V='0.7874015748031495' U='MM' F='Width*0.5'/><Cell N='Y' V='1.181102362204724' U='MM' F='Height*1'/><Cell N='DirX' V='0'/><Cell N='DirY' V='-1'/><Cell N='Type' V='0' F='No Formula'/><Cell N='AutoGen' V='0' F='No Formula'/><Cell N='Prompt' V='' F='No Formula'/></Row><Row T='Connection' IX='3'><Cell N='X' V='0' U='MM' F='Width*0'/><Cell N='Y' V='0.5905511811023622' U='MM' F='Height*0.5'/><Cell N='DirX' V='1'/><Cell N='DirY' V='0'/><Cell N='Type' V='0' F='No Formula'/><Cell N='AutoGen' V='0' F='No Formula'/><Cell N='Prompt' V='' F='No Formula'/></Row><Row T='Connection' IX='4'><Cell N='X' V='0.7874015748031495' U='MM' F='Width*0.5'/><Cell N='Y' V='0.5905511811023622' U='MM' F='Height*0.5'/><Cell N='DirX' V='0'/><Cell N='DirY' V='1'/><Cell N='Type' V='0' F='No Formula'/><Cell N='AutoGen' V='0' F='No Formula'/><Cell N='Prompt' V='' F='No Formula'/></Row></Section><Section N='User'><Row N='visVersion'><Cell N='Value' V='15'/><Cell N='Prompt' V='' F='No Formula'/></Row><Row N='visMasterStencil'><Cell N='Value' V='Basic_M.vssx' U='STR'/><Cell N='Prompt' V=''/></Row></Section><Section N='Character'><Row IX='0'><Cell N='Size' V='0.1388888888888889' U='PT'/></Row></Section><Section N='Geometry' IX='0'><Cell N='NoFill' V='0'/><Cell N='NoLine' V='0'/><Cell N='NoShow' V='0'/><Cell N='NoSnap' V='0' F='No Formula'/><Cell N='NoQuickDrag' V='0' F='No Formula'/><Row T='MoveTo' IX='1'><Cell N='X' V='0' U='MM' F='Width*0'/><Cell N='Y' V='0' U='MM' F='Height*0'/></Row><Row T='LineTo' IX='2'><Cell N='X' V='1.574803149606299' U='MM' F='Width*1'/><Cell N='Y' V='0' U='MM' F='Height*0'/></Row><Row T='LineTo' IX='3'><Cell N='X' V='1.574803149606299' U='MM' F='Width*1'/><Cell N='Y' V='1.181102362204724' U='MM' F='Height*1'/></Row><Row T='LineTo' IX='4'><Cell N='X' V='0' U='MM' F='Width*0'/><Cell N='Y' V='1.181102362204724' U='MM' F='Height*1'/></Row><Row T='LineTo' IX='5'><Cell N='X' V='0' U='MM' F='Geometry1.X1'/><Cell N='Y' V='0' U='MM' F='Geometry1.Y1'/></Row></Section></Shape></Shapes></MasterContents>
