# Supplementary material for: Video captioning based on vision transformer and reinforcement learning
Source: PeerJ Comput Sci. 2022 Mar 16;8:e916. doi: 10.7717/peerj-cs.916 (PMC9044334; doi:10.7717/peerj-cs.916)
Supplement: Supplemental Information 1 — The model includes three parts: feature extraction, video captioning generation, reward mechanism (Policy Gradient). L is the number of transformer encoder blocks in the encoder of the model, ws is the word sequence generated by the model, and r(*) is the reinforcement learning reward function [file peerj-cs-08-916-s001.vsdx › visio/pages/page1.xml]

<?xml version='1.0' encoding='utf-8' ?>
<PageContents xmlns='http://schemas.microsoft.com/office/visio/2012/main' xmlns:r='http://schemas.openxmlformats.org/officeDocument/2006/relationships' xml:space='preserve'><Shapes><Shape ID='428' Type='Shape' Master='4'><Cell N='PinX' V='4.183070769227371'/><Cell N='PinY' V='5.354330940221164'/><Cell N='Width' V='7.185039140773259'/><Cell N='Height' V='2.283464494053961'/><Cell N='LocPinX' V='3.59251957038663' F='Inh'/><Cell N='LocPinY' V='1.14173224702698' F='Inh'/><Cell N='LineColor' V='#ffffff' F='THEMEGUARD(RGB(255,255,255))'/><Section N='Connection'><Row T='Connection' IX='0'><Cell N='X' V='3.59251957038663' F='Inh'/></Row><Row T='Connection' IX='1'><Cell N='X' V='7.185039140773259' F='Inh'/><Cell N='Y' V='1.14173224702698' F='Inh'/></Row><Row T='Connection' IX='2'><Cell N='X' V='3.59251957038663' F='Inh'/><Cell N='Y' V='2.283464494053961' F='Inh'/></Row><Row T='Connection' IX='3'><Cell N='Y' V='1.14173224702698' F='Inh'/></Row><Row T='Connection' IX='4'><Cell N='X' V='3.59251957038663' F='Inh'/><Cell N='Y' V='1.14173224702698' F='Inh'/></Row></Section><Section N='Geometry' IX='0'><Row T='LineTo' IX='2'><Cell N='X' V='7.185039140773259' F='Inh'/></Row><Row T='LineTo' IX='3'><Cell N='X' V='7.185039140773259' F='Inh'/><Cell N='Y' V='2.283464494053961' F='Inh'/></Row><Row T='LineTo' IX='4'><Cell N='Y' V='2.283464494053961' F='Inh'/></Row></Section></Shape><Shape ID='426' Type='Shape' Master='4'><Cell N='PinX' V='6.909448614361513'/><Cell N='PinY' V='6.120079129875185'/><Cell N='Width' V='1.653543313609758'/><Cell N='Height' V='0.2814964192009093'/><Cell N='LocPinX' V='0.8267716568048789' F='Inh'/><Cell N='LocPinY' V='0.1407482096004546' F='Inh'/><Cell N='LineColor' V='#7f7f7f' F='THEMEGUARD(MSOTINT(RGB(255,255,255),-50))'/><Section N='Connection'><Row T='Connection' IX='0'><Cell N='X' V='0.8267716568048789' F='Inh'/></Row><Row T='Connection' IX='1'><Cell N='X' V='1.653543313609758' F='Inh'/><Cell N='Y' V='0.1407482096004546' F='Inh'/></Row><Row T='Connection' IX='2'><Cell N='X' V='0.8267716568048789' F='Inh'/><Cell N='Y' V='0.2814964192009093' F='Inh'/></Row><Row T='Connection' IX='3'><Cell N='Y' V='0.1407482096004546' F='Inh'/></Row><Row T='Connection' IX='4'><Cell N='X' V='0.8267716568048789' F='Inh'/><Cell N='Y' V='0.1407482096004546' F='Inh'/></Row></Section><Section N='Geometry' IX='0'><Row T='LineTo' IX='2'><Cell N='X' V='1.653543313609758' F='Inh'/></Row><Row T='LineTo' IX='3'><Cell N='X' V='1.653543313609758' F='Inh'/><Cell N='Y' V='0.2814964192009093' F='Inh'/></Row><Row T='LineTo' IX='4'><Cell N='Y' V='0.2814964192009093' F='Inh'/></Row></Section></Shape><Shape ID='249' NameU='Dynamic connector.249' Name='动态连接线.249' Type='Shape' Master='5'><Cell N='PinX' V='3.525125455547973' F='Inh'/><Cell N='PinY' V='5.628932071434166' F='Inh'/><Cell N='Width' V='0.1998573557632346' F='GUARD(EndX-BeginX)'/><Cell N='Height' V='0.1968503937007874' F='GUARD(0.19685039370079DL)'/><Cell N='LocPinX' V='0.0999286778816173' F='Inh'/><Cell N='LocPinY' V='0.09842519685039369' F='Inh'/><Cell N='BeginX' V='3.425196777666356' F='PAR(PNT(Sheet.219!Connections.X2,Sheet.219!Connections.Y2))'/><Cell N='BeginY' V='5.580709229082375' F='PAR(PNT(Sheet.219!Connections.X2,Sheet.219!Connections.Y2))'/><Cell N='EndX' V='3.625054133429591' F='_WALKGLUE(EndTrigger,BegTrigger,WalkPreference)'/><Cell N='EndY' V='5.677154913785957' F='_WALKGLUE(EndTrigger,BegTrigger,WalkPreference)'/><Cell N='LayerMember' V='0'/><Cell N='BegTrigger' V='2' F='_XFTRIGGER(Sheet.219!EventXFMod)'/><Cell N='EndTrigger' V='2' F='_XFTRIGGER(Sheet.265!EventXFMod)'/><Cell N='TxtPinX' V='0.09992867708206175' F='Inh'/><Cell N='TxtPinY' V='0.09842519462108612' F='Inh'/><Cell N='ConFixedCode' V='3'/><Section N='Control'><Row N='TextPosition'><Cell N='X' V='0.09992867708206175'/><Cell N='Y' V='0.09842519462108612'/><Cell N='XDyn' V='0.09992867708206175' F='Inh'/><Cell N='YDyn' V='0.09842519462108612' F='Inh'/></Row></Section><Section N='Character'><Row IX='0'><Cell N='Font' V='Times New Roman'/><Cell N='ComplexScriptFont' V='Times New Roman'/></Row></Section><Section N='Geometry' IX='0'><Row T='MoveTo' IX='1'><Cell N='Y' V='0.05020235449860255'/></Row><Row T='LineTo' IX='2'><Cell N='X' V='0.1998573557632355'/><Cell N='Y' V='0.1466480392021845'/></Row><Row T='LineTo' IX='3' Del='1'/></Section></Shape><Shape ID='253' NameU='Ellipse.253' Name='椭圆形.253' Type='Shape' Master='9'><Cell N='PinX' V='6.700623540830489'/><Cell N='PinY' V='5.579513569984835'/><Cell N='Width' V='0.6453410845419296'/><Cell N='Height' V='0.4302273896946197'/><Cell N='LocPinX' V='0.3226705422709648' F='Inh'/><Cell N='LocPinY' V='0.2151136948473099' F='Inh'/><Cell N='TxtPinX' V='0.3226705422709648' F='Inh'/><Cell N='TxtPinY' V='0.2151136948473099' F='Inh'/><Cell N='TxtWidth' V='0.5646734489741885' F='Inh'/><Cell N='TxtHeight' V='0.3764489659827923' F='Inh'/><Cell N='TxtLocPinX' V='0.2823367244870942' F='Inh'/><Cell N='TxtLocPinY' V='0.1882244829913961' F='Inh'/><Cell N='ObjType' V='1'/><Cell N='FillForegnd' V='#fbd7bb' F='THEMEGUARD(MSOTINT(THEMEVAL("AccentColor5"),60))'/><Cell N='FillBkgnd' V='#fce1cd' F='THEMEGUARD(SHADE(FillForegnd,LUMDIFF(THEMEVAL("FillColor"),THEMEVAL("FillColor2"))))'/><Cell N='FillGradientEnabled' V='0'/><Section N='Connection'><Row T='Connection' IX='0'><Cell N='X' V='0.3226705422709648' F='Inh'/><Cell N='Y' V='0.4302273896946197' F='Inh'/></Row><Row T='Connection' IX='1'><Cell N='X' V='0.3226705422709648' F='Inh'/><Cell N='Y' V='0.2151136948473099' F='Inh'/></Row><Row T='Connection' IX='2'><Cell N='Y' V='0.2151136948473099' F='Inh'/></Row><Row T='Connection' IX='3'><Cell N='X' V='0.3226705422709648' F='Inh'/></Row><Row T='Connection' IX='4'><Cell N='X' V='0.6453410845419296' F='Inh'/><Cell N='Y' V='0.2151136948473099' F='Inh'/></Row></Section><Section N='Character'><Row IX='0'><Cell N='Font' V='Times New Roman'/><Cell N='Color' V='0'/><Cell N='Style' V='0'/><Cell N='Size' V='0.1666666666666667' U='PT'/><Cell N='AsianFont' V='SimSun'/><Cell N='ComplexScriptFont' V='Times New Roman'/></Row><Row IX='1'><Cell N='Font' V='Times New Roman'/><Cell N='Color' V='Themed' F='THEMEVAL()'/><Cell N='Style' V='Themed' F='THEMEVAL()'/><Cell N='Case' V='0'/><Cell N='Pos' V='0'/><Cell N='FontScale' V='1'/><Cell N='Size' V='0.1666666666666667' U='PT'/><Cell N='DblUnderline' V='0'/><Cell N='Overline' V='0'/><Cell N='Strikethru' V='0'/><Cell N='DoubleStrikethrough' V='0'/><Cell N='Letterspace' V='0'/><Cell N='ColorTrans' V='0'/><Cell N='AsianFont' V='Themed' F='THEMEVAL()'/><Cell N='ComplexScriptFont' V='Times New Roman'/><Cell N='ComplexScriptSize' V='-1'/><Cell N='LangID' V='zh-CN'/></Row></Section><Section N='Geometry' IX='0'><Row T='MoveTo' IX='1'><Cell N='Y' V='0.2151136948473099' F='Inh'/></Row><Row T='EllipticalArcTo' IX='2'><Cell N='X' V='0.6453410845419296' F='Inh'/><Cell N='Y' V='0.2151136948473099' F='Inh'/><Cell N='A' V='0.3226705422709648' U='DL' F='Inh'/><Cell N='B' V='0.4302273896946197' U='DL' F='Inh'/></Row><Row T='EllipticalArcTo' IX='3'><Cell N='Y' V='0.2151136948473099' F='Inh'/><Cell N='A' V='0.3226705422709648' U='DL' F='Inh'/></Row></Section><Text><cp IX='0'/>CIDEr<cp IX='1'/>
</Text></Shape><Shape ID='254' Type='Foreign' LineStyle='2' FillStyle='2' TextStyle='2'><Cell N='PinX' V='6.700623540830489'/><Cell N='PinY' V='4.540354584256608'/><Cell N='Width' V='0.510236220472441'/><Cell N='Height' V='0.3019685039370079'/><Cell N='LocPinX' V='0.2551181102362205' F='Width*0.5'/><Cell N='LocPinY' V='0.1509842519685039' F='Height*0.5'/><Cell N='Angle' V='0'/><Cell N='FlipX' V='0'/><Cell N='FlipY' V='0'/><Cell N='ResizeMode' V='0'/><Cell N='ImgOffsetX' V='0' F='ImgWidth*0'/><Cell N='ImgOffsetY' V='0' F='ImgHeight*0'/><Cell N='ImgWidth' V='0.510236220472441' F='Width*1'/><Cell N='ImgHeight' V='0.3019685039370079' F='Height*1'/><Cell N='ClippingPath' V='' F='No Formula' E='#N/A'/><Cell N='TxtPinX' V='0.2551181102362205' F='Width*0.5'/><Cell N='TxtPinY' V='0' F='Height*0'/><Cell N='TxtWidth' V='0.510236220472441' F='Width*1'/><Cell N='TxtHeight' V='0' F='Height*0'/><Cell N='TxtLocPinX' V='0.2551181102362205' F='TxtWidth*0.5'/><Cell N='TxtLocPinY' V='0' F='TxtHeight*0.5'/><Cell N='TxtAngle' V='0'/><Cell N='VerticalAlign' V='0'/><Cell N='ObjType' V='1'/><Section N='Character'><Row IX='0'><Cell N='Font' V='Times New Roman'/><Cell N='ComplexScriptFont' V='Times New Roman'/></Row></Section><Section N='Geometry' IX='0'><Cell N='NoFill' V='0'/><Cell N='NoLine' V='0'/><Cell N='NoShow' V='0'/><Cell N='NoSnap' V='0'/><Cell N='NoQuickDrag' V='0'/><Row T='RelMoveTo' IX='1'><Cell N='X' V='0'/><Cell N='Y' V='0'/></Row><Row T='RelLineTo' IX='2'><Cell N='X' V='1'/><Cell N='Y' V='0'/></Row><Row T='RelLineTo' IX='3'><Cell N='X' V='1'/><Cell N='Y' V='1'/></Row><Row T='RelLineTo' IX='4'><Cell N='X' V='0'/><Cell N='Y' V='1'/></Row><Row T='RelLineTo' IX='5'><Cell N='X' V='0'/><Cell N='Y' V='0'/></Row></Section><ForeignData ForeignType='Object' ObjectType='33280' ShowAsIcon='0' ObjectWidth='0.51023622047244' ObjectHeight='0.30196850393701'><Rel r:id='rId8'/></ForeignData></Shape><Shape ID='258' NameU='Dynamic connector.258' Name='动态连接线.258' Type='Shape' Master='5'><Cell N='PinX' V='6.700623540830489' F='Inh'/><Cell N='PinY' V='5.004074695499405' U='MM' F='Inh'/><Cell N='Width' V='-0.1968503937007874' F='GUARD(-0.19685039370079DL)'/><Cell N='Height' V='-0.720650359276239' U='MM' F='GUARD(EndY-BeginY)'/><Cell N='LocPinX' V='-0.09842519685039369' F='Inh'/><Cell N='LocPinY' V='-0.3603251796381195' U='MM' F='Inh'/><Cell N='BeginX' V='6.700623540830489' F='PAR(PNT(Sheet.253!Connections.X4,Sheet.253!Connections.Y4))'/><Cell N='BeginY' V='5.364399875137525' U='MM' F='PAR(PNT(Sheet.253!Connections.X4,Sheet.253!Connections.Y4))'/><Cell N='EndX' V='6.700623540830489' F='_WALKGLUE(EndTrigger,BegTrigger,WalkPreference)'/><Cell N='EndY' V='4.643749515861286' F='_WALKGLUE(EndTrigger,BegTrigger,WalkPreference)'/><Cell N='LayerMember' V='0'/><Cell N='BegTrigger' V='2' F='_XFTRIGGER(Sheet.253!EventXFMod)'/><Cell N='EndTrigger' V='2' F='_XFTRIGGER(Sheet.254!EventXFMod)'/><Cell N='TxtPinX' V='-0.09842519462108612' F='Inh'/><Cell N='TxtPinY' V='-0.360325187444687' F='Inh'/><Section N='Control'><Row N='TextPosition'><Cell N='X' V='-0.09842519462108612'/><Cell N='Y' V='-0.360325187444687'/><Cell N='XDyn' V='-0.09842519462108612' F='Inh'/><Cell N='YDyn' V='-0.360325187444687' F='Inh'/></Row></Section><Section N='Character'><Row IX='0'><Cell N='Font' V='Times New Roman'/><Cell N='ComplexScriptFont' V='Times New Roman'/></Row></Section><Section N='Geometry' IX='0'><Row T='MoveTo' IX='1'><Cell N='X' V='-0.09842519685039353'/></Row><Row T='LineTo' IX='2'><Cell N='X' V='-0.09842519685039441'/><Cell N='Y' V='-0.7206503592762381'/></Row><Row T='LineTo' IX='3' Del='1'/></Section></Shape><Shape ID='259' NameU='Dynamic connector.259' Name='动态连接线.259' Type='Shape' Master='5'><Cell N='PinX' V='7.202591823939281' F='Inh'/><Cell N='PinY' V='5.58503248755407' F='Inh'/><Cell N='Width' V='-0.3585954816756543' F='GUARD(EndX-BeginX)'/><Cell N='Height' V='-0.1968503937007874' F='GUARD(-0.19685039370079DL)'/><Cell N='LocPinX' V='-0.1792977408378271' F='Inh'/><Cell N='LocPinY' V='-0.09842519685039369' F='Inh'/><Cell N='BeginX' V='7.381889564777109'/><Cell N='BeginY' V='5.590551405123305'/><Cell N='EndX' V='7.023294083101455' F='PAR(PNT(Sheet.253!Connections.X5,Sheet.253!Connections.Y5))'/><Cell N='EndY' V='5.579513569984835' F='PAR(PNT(Sheet.253!Connections.X5,Sheet.253!Connections.Y5))'/><Cell N='LayerMember' V='0'/><Cell N='BegTrigger' V='1' F='_XFTRIGGER(EventXFMod)'/><Cell N='EndTrigger' V='2' F='_XFTRIGGER(Sheet.253!EventXFMod)'/><Cell N='TxtPinX' V='-0.1792977452278138' F='Inh'/><Cell N='TxtPinY' V='-0.09842519834637643' F='Inh'/><Cell N='ConFixedCode' V='3'/><Section N='Control'><Row N='TextPosition'><Cell N='X' V='-0.1792977452278138'/><Cell N='Y' V='-0.09842519834637643'/><Cell N='XDyn' V='-0.1792977452278138' F='Inh'/><Cell N='YDyn' V='-0.09842519834637643' F='Inh'/></Row></Section><Section N='Character'><Row IX='0'><Cell N='Font' V='Times New Roman'/><Cell N='ComplexScriptFont' V='Times New Roman'/></Row></Section><Section N='Geometry' IX='0'><Row T='MoveTo' IX='1'><Cell N='Y' V='-0.09290627928116191'/></Row><Row T='LineTo' IX='2'><Cell N='X' V='-0.3585954816756534'/><Cell N='Y' V='-0.1039441144196251'/></Row><Row T='LineTo' IX='3' Del='1'/></Section></Shape><Shape ID='276' NameU='Dynamic connector.276' Name='动态连接线.276' Type='Shape' Master='5'><Cell N='PinX' V='6.040562789291249' F='Inh'/><Cell N='PinY' V='4.549388783610625' F='Inh'/><Cell N='Width' V='-0.8007645143756355' F='GUARD(EndX-BeginX)'/><Cell N='Height' V='0.1968503937007874' F='GUARD(0.19685039370079DL)'/><Cell N='LocPinX' V='-0.4003822571878177' F='Inh'/><Cell N='LocPinY' V='0.09842519685039369' F='Inh'/><Cell N='BeginX' V='6.440945046479066'/><Cell N='BeginY' V='4.549213378563758'/><Cell N='EndX' V='5.640180532103431' F='PAR(PNT(Sheet.281!Connections.X5,Sheet.281!Connections.Y5))'/><Cell N='EndY' V='4.549564188657492' F='PAR(PNT(Sheet.281!Connections.X5,Sheet.281!Connections.Y5))'/><Cell N='LayerMember' V='0'/><Cell N='BegTrigger' V='1' F='_XFTRIGGER(EventXFMod)'/><Cell N='EndTrigger' V='2' F='_XFTRIGGER(Sheet.281!EventXFMod)'/><Cell N='TxtPinX' V='-0.4005576622346836' F='Inh'/><Cell N='TxtPinY' V='0.0753612783718669' F='Inh'/><Cell N='LinePattern' V='23'/><Section N='Control'><Row N='TextPosition'><Cell N='X' V='-0.4005576622346836'/><Cell N='Y' V='0.0753612783718669'/><Cell N='XDyn' V='-0.4005576622346836' F='Inh'/><Cell N='YDyn' V='0.0753612783718669' F='Inh'/></Row></Section><Section N='Character'><Row IX='0'><Cell N='Font' V='Times New Roman'/><Cell N='ComplexScriptFont' V='Times New Roman'/></Row></Section><Section N='Geometry' IX='0'><Row T='MoveTo' IX='1'><Cell N='Y' V='0.09824979180352766'/></Row><Row T='LineTo' IX='2'><Cell N='X' V='-0.06545308620082047'/><Cell N='Y' V='0.09824979180352766'/></Row><Row T='LineTo' IX='3'><Cell N='X' V='-0.06545308620082047'/><Cell N='Y' V='0.0753612783718669'/></Row><Row T='LineTo' IX='4'><Cell N='X' V='-0.7638550655567382'/><Cell N='Y' V='0.0753612783718669'/></Row><Row T='LineTo' IX='5'><Cell N='X' V='-0.7638550655567382'/><Cell N='Y' V='0.09860060189725939'/></Row><Row T='LineTo' IX='6'><Cell N='X' V='-0.8007645143756346'/><Cell N='Y' V='0.09860060189725939'/></Row></Section><Text><cp IX='0'/></Text></Shape><Shape ID='279' NameU='Ellipse.279' Name='椭圆形.279' Type='Shape' Master='9'><Cell N='PinX' V='4.222043997419253'/><Cell N='PinY' V='4.549564188657493'/><Cell N='Width' V='0.7745242090285327'/><Cell N='Height' V='0.4302273896946197'/><Cell N='LocPinX' V='0.3872621045142664' F='Inh'/><Cell N='LocPinY' V='0.2151136948473099' F='Inh'/><Cell N='TxtPinX' V='0.3872621045142664' F='Inh'/><Cell N='TxtPinY' V='0.2151136948473099' F='Inh'/><Cell N='TxtWidth' V='0.6777086828999661' F='Inh'/><Cell N='TxtHeight' V='0.3764489659827923' F='Inh'/><Cell N='TxtLocPinX' V='0.3388543414499831' F='Inh'/><Cell N='TxtLocPinY' V='0.1882244829913961' F='Inh'/><Cell N='ObjType' V='1'/><Cell N='FillForegnd' V='#dbeef3' F='THEMEGUARD(MSOTINT(THEMEVAL("AccentColor4"),80))'/><Cell N='FillBkgnd' V='#e4f2f5' F='THEMEGUARD(SHADE(FillForegnd,LUMDIFF(THEMEVAL("FillColor"),THEMEVAL("FillColor2"))))'/><Cell N='FillGradientEnabled' V='0'/><Section N='Connection'><Row T='Connection' IX='0'><Cell N='X' V='0.3872621045142664' F='Inh'/><Cell N='Y' V='0.4302273896946197' F='Inh'/></Row><Row T='Connection' IX='1'><Cell N='X' V='0.3872621045142664' F='Inh'/><Cell N='Y' V='0.2151136948473099' F='Inh'/></Row><Row T='Connection' IX='2'><Cell N='Y' V='0.2151136948473099' F='Inh'/></Row><Row T='Connection' IX='3'><Cell N='X' V='0.3872621045142664' F='Inh'/></Row><Row T='Connection' IX='4'><Cell N='X' V='0.7745242090285327' F='Inh'/><Cell N='Y' V='0.2151136948473099' F='Inh'/></Row></Section><Section N='Character'><Row IX='0'><Cell N='Font' V='Times New Roman'/><Cell N='Color' V='0'/><Cell N='Style' V='0'/><Cell N='Size' V='0.1666666666666667' U='PT'/><Cell N='AsianFont' V='SimSun'/><Cell N='ComplexScriptFont' V='Times New Roman'/></Row><Row IX='1'><Cell N='Font' V='Times New Roman'/><Cell N='Color' V='0'/><Cell N='Style' V='0'/><Cell N='Case' V='0'/><Cell N='Pos' V='0'/><Cell N='FontScale' V='1'/><Cell N='Size' V='0.1666666666666667' U='PT'/><Cell N='DblUnderline' V='0'/><Cell N='Overline' V='0'/><Cell N='Strikethru' V='0'/><Cell N='DoubleStrikethrough' V='0'/><Cell N='Letterspace' V='0'/><Cell N='ColorTrans' V='0'/><Cell N='AsianFont' V='SimSun'/><Cell N='ComplexScriptFont' V='Times New Roman'/><Cell N='ComplexScriptSize' V='-1'/><Cell N='LangID' V='en-US'/></Row><Row IX='2'><Cell N='Font' V='Times New Roman'/><Cell N='Color' V='0' F='THEMEVAL()'/><Cell N='Style' V='0' F='THEMEVAL()'/><Cell N='Case' V='0'/><Cell N='Pos' V='0'/><Cell N='FontScale' V='1'/><Cell N='Size' V='0.1666666666666667' U='PT'/><Cell N='DblUnderline' V='0'/><Cell N='Overline' V='0'/><Cell N='Strikethru' V='0'/><Cell N='DoubleStrikethrough' V='0'/><Cell N='Letterspace' V='0'/><Cell N='ColorTrans' V='0'/><Cell N='AsianFont' V='SimSun' F='THEMEVAL()'/><Cell N='ComplexScriptFont' V='Times New Roman'/><Cell N='ComplexScriptSize' V='-1'/><Cell N='LangID' V='zh-CN'/></Row></Section><Section N='Geometry' IX='0'><Row T='MoveTo' IX='1'><Cell N='Y' V='0.2151136948473099' F='Inh'/></Row><Row T='EllipticalArcTo' IX='2'><Cell N='X' V='0.7745242090285327' F='Inh'/><Cell N='Y' V='0.2151136948473099' F='Inh'/><Cell N='A' V='0.3872621045142664' U='DL' F='Inh'/><Cell N='B' V='0.4302273896946197' U='DL' F='Inh'/><Cell N='D' V='1.800267085687638' F='Inh'/></Row><Row T='EllipticalArcTo' IX='3'><Cell N='Y' V='0.2151136948473099' F='Inh'/><Cell N='A' V='0.3872621045142664' U='DL' F='Inh'/><Cell N='D' V='1.800267085687638' F='Inh'/></Row></Section><Text><cp IX='0'/>CE<cp IX='1'/> loss<cp IX='2'/>
</Text></Shape><Shape ID='281' NameU='Ellipse.281' Name='椭圆形.281' Type='Shape' Master='9'><Cell N='PinX' V='5.252918427589164'/><Cell N='PinY' V='4.549564188657492'/><Cell N='Width' V='0.7745242090285327'/><Cell N='Height' V='0.4302273896946197'/><Cell N='LocPinX' V='0.3872621045142664' F='Inh'/><Cell N='LocPinY' V='0.2151136948473099' F='Inh'/><Cell N='TxtPinX' V='0.3872621045142664' F='Inh'/><Cell N='TxtPinY' V='0.2151136948473099' F='Inh'/><Cell N='TxtWidth' V='0.6777086828999661' F='Inh'/><Cell N='TxtHeight' V='0.3764489659827923' F='Inh'/><Cell N='TxtLocPinX' V='0.3388543414499831' F='Inh'/><Cell N='TxtLocPinY' V='0.1882244829913961' F='Inh'/><Cell N='ObjType' V='1'/><Cell N='FillForegnd' V='#dbeef3' F='THEMEGUARD(MSOTINT(THEMEVAL("AccentColor4"),80))'/><Cell N='FillBkgnd' V='#e4f2f5' F='THEMEGUARD(SHADE(FillForegnd,LUMDIFF(THEMEVAL("FillColor"),THEMEVAL("FillColor2"))))'/><Cell N='FillGradientEnabled' V='0'/><Section N='Connection'><Row T='Connection' IX='0'><Cell N='X' V='0.3872621045142664' F='Inh'/><Cell N='Y' V='0.4302273896946197' F='Inh'/></Row><Row T='Connection' IX='1'><Cell N='X' V='0.3872621045142664' F='Inh'/><Cell N='Y' V='0.2151136948473099' F='Inh'/></Row><Row T='Connection' IX='2'><Cell N='Y' V='0.2151136948473099' F='Inh'/></Row><Row T='Connection' IX='3'><Cell N='X' V='0.3872621045142664' F='Inh'/></Row><Row T='Connection' IX='4'><Cell N='X' V='0.7745242090285327' F='Inh'/><Cell N='Y' V='0.2151136948473099' F='Inh'/></Row></Section><Section N='Character'><Row IX='0'><Cell N='Font' V='Times New Roman'/><Cell N='Color' V='0'/><Cell N='Style' V='0'/><Cell N='Size' V='0.1666666666666667' U='PT'/><Cell N='AsianFont' V='SimSun'/><Cell N='ComplexScriptFont' V='Times New Roman'/></Row><Row IX='1'><Cell N='Font' V='Times New Roman'/><Cell N='Color' V='Themed' F='THEMEVAL()'/><Cell N='Style' V='Themed' F='THEMEVAL()'/><Cell N='Case' V='0'/><Cell N='Pos' V='0'/><Cell N='FontScale' V='1'/><Cell N='Size' V='0.1666666666666667' U='PT'/><Cell N='DblUnderline' V='0'/><Cell N='Overline' V='0'/><Cell N='Strikethru' V='0'/><Cell N='DoubleStrikethrough' V='0'/><Cell N='Letterspace' V='0'/><Cell N='ColorTrans' V='0'/><Cell N='AsianFont' V='Themed' F='THEMEVAL()'/><Cell N='ComplexScriptFont' V='Times New Roman'/><Cell N='ComplexScriptSize' V='-1'/><Cell N='LangID' V='zh-CN'/></Row></Section><Section N='Geometry' IX='0'><Row T='MoveTo' IX='1'><Cell N='Y' V='0.2151136948473099' F='Inh'/></Row><Row T='EllipticalArcTo' IX='2'><Cell N='X' V='0.7745242090285327' F='Inh'/><Cell N='Y' V='0.2151136948473099' F='Inh'/><Cell N='A' V='0.3872621045142664' U='DL' F='Inh'/><Cell N='B' V='0.4302273896946197' U='DL' F='Inh'/><Cell N='D' V='1.800267085687638' F='Inh'/></Row><Row T='EllipticalArcTo' IX='3'><Cell N='Y' V='0.2151136948473099' F='Inh'/><Cell N='A' V='0.3872621045142664' U='DL' F='Inh'/><Cell N='D' V='1.800267085687638' F='Inh'/></Row></Section><Text><cp IX='0'/>RL loss<cp IX='1'/>
</Text></Shape><Shape ID='283' Type='Shape' LineStyle='1' FillStyle='1' TextStyle='8'><Cell N='PinX' V='4.73748121250421'/><Cell N='PinY' V='4.54265148630021'/><Cell N='Width' V='0.1790072293594887'/><Cell N='Height' V='0.1666666666666696'/><Cell N='LocPinX' V='0.08950361467974433' F='Width*0.5'/><Cell N='LocPinY' V='0.08333333333333481' F='Height*0.5'/><Cell N='Angle' V='0'/><Cell N='FlipX' V='0'/><Cell N='FlipY' V='0'/><Cell N='ResizeMode' V='0'/><Cell N='EventDblClick' V='0' F='OPENTEXTWIN()'/><Cell N='LinePattern' V='0' F='THEMEGUARD(0)'/><Cell N='FillPattern' V='0' F='THEMEGUARD(0)'/><Cell N='ShdwPattern' V='0' F='THEMEGUARD(0)'/><Cell N='LineGradientEnabled' V='0' F='THEMEGUARD(FALSE)'/><Cell N='FillGradientEnabled' V='0' F='THEMEGUARD(FALSE)'/><Cell N='QuickStyleVariation' V='3'/><Section N='Character'><Row IX='0'><Cell N='Font' V='Times New Roman'/><Cell N='ComplexScriptFont' V='Times New Roman'/></Row></Section><Section N='Geometry' IX='0'><Cell N='NoFill' V='0'/><Cell N='NoLine' V='0'/><Cell N='NoShow' V='0'/><Cell N='NoSnap' V='0'/><Cell N='NoQuickDrag' V='0'/><Row T='RelMoveTo' IX='1'><Cell N='X' V='0'/><Cell N='Y' V='0'/></Row><Row T='RelLineTo' IX='2'><Cell N='X' V='1'/><Cell N='Y' V='0'/></Row><Row T='RelLineTo' IX='3'><Cell N='X' V='1'/><Cell N='Y' V='1'/></Row><Row T='RelLineTo' IX='4'><Cell N='X' V='0'/><Cell N='Y' V='1'/></Row><Row T='RelLineTo' IX='5'><Cell N='X' V='0'/><Cell N='Y' V='0'/></Row></Section><Text><cp IX='0'/>+
</Text></Shape><Shape ID='284' NameU='Dynamic connector' Name='动态连接线' Type='Shape' Master='5'><Cell N='PinX' V='4.221326330988889' F='Inh'/><Cell N='PinY' V='4.951237042755659' F='Inh'/><Cell N='Width' V='0.1968503937007874' F='GUARD(0.19685039370079DL)'/><Cell N='Height' V='-0.3731183185017111' F='GUARD(EndY-BeginY)'/><Cell N='LocPinX' V='0.098425196850395' F='Inh'/><Cell N='LocPinY' V='-0.1865591592508555' F='Inh'/><Cell N='BeginX' V='4.220608664558524' F='_WALKGLUE(BegTrigger,EndTrigger,WalkPreference)'/><Cell N='BeginY' V='5.137796202006514' F='_WALKGLUE(BegTrigger,EndTrigger,WalkPreference)'/><Cell N='EndX' V='4.222043997419253' F='PAR(PNT(Sheet.279!Connections.X1,Sheet.279!Connections.Y1))'/><Cell N='EndY' V='4.764677883504803' F='PAR(PNT(Sheet.279!Connections.X1,Sheet.279!Connections.Y1))'/><Cell N='LayerMember' V='0'/><Cell N='BegTrigger' V='2' F='_XFTRIGGER(Sheet.265!EventXFMod)'/><Cell N='EndTrigger' V='2' F='_XFTRIGGER(Sheet.279!EventXFMod)'/><Cell N='ConFixedCode' V='3'/><Cell N='TxtPinX' V='0.09842519834637642' F='Inh'/><Cell N='TxtPinY' V='-0.1865591555833816' F='Inh'/><Section N='Control'><Row N='TextPosition'><Cell N='X' V='0.09842519834637642'/><Cell N='Y' V='-0.1865591555833816'/><Cell N='XDyn' V='0.09842519834637642' F='Inh'/><Cell N='YDyn' V='-0.1865591555833816' F='Inh'/></Row></Section><Section N='Character'><Row IX='0'><Cell N='Font' V='Times New Roman'/><Cell N='ComplexScriptFont' V='Times New Roman'/></Row></Section><Section N='Geometry' IX='0'><Row T='MoveTo' IX='1'><Cell N='X' V='0.09770753062617033'/></Row><Row T='LineTo' IX='2'><Cell N='X' V='0.09914286307461673'/><Cell N='Y' V='-0.373118318501696'/></Row><Row T='LineTo' IX='3' Del='1'/></Section></Shape><Shape ID='285' Type='Shape' Master='5'><Cell N='PinX' V='5.25251157756991' F='Inh'/><Cell N='PinY' V='4.990606942120353' F='Inh'/><Cell N='Width' V='0.1968503937007874' F='GUARD(0.19685039370079DL)'/><Cell N='Height' V='-0.4518581172311036' F='GUARD(EndY-BeginY)'/><Cell N='LocPinX' V='0.09842519685039369' F='Inh'/><Cell N='LocPinY' V='-0.2259290586155518' F='Inh'/><Cell N='BeginX' V='5.252104727550656'/><Cell N='BeginY' V='5.216536000735905'/><Cell N='EndX' V='5.252918427589164' F='PAR(PNT(Sheet.281!Connections.X1,Sheet.281!Connections.Y1))'/><Cell N='EndY' V='4.764677883504802' F='PAR(PNT(Sheet.281!Connections.X1,Sheet.281!Connections.Y1))'/><Cell N='LayerMember' V='0'/><Cell N='BegTrigger' V='1' F='_XFTRIGGER(EventXFMod)'/><Cell N='EndTrigger' V='2' F='_XFTRIGGER(Sheet.281!EventXFMod)'/><Cell N='ConFixedCode' V='3'/><Cell N='TxtPinX' V='0.09842519834637642' F='Inh'/><Cell N='TxtPinY' V='-0.2259290516376495' F='Inh'/><Section N='Control'><Row N='TextPosition'><Cell N='X' V='0.09842519834637642'/><Cell N='Y' V='-0.2259290516376495'/><Cell N='XDyn' V='0.09842519834637642' F='Inh'/><Cell N='YDyn' V='-0.2259290516376495' F='Inh'/></Row></Section><Section N='Character'><Row IX='0'><Cell N='Font' V='Times New Roman'/><Cell N='ComplexScriptFont' V='Times New Roman'/></Row></Section><Section N='Geometry' IX='0'><Row T='MoveTo' IX='1'><Cell N='X' V='0.09801834683113953'/></Row><Row T='LineTo' IX='2'><Cell N='X' V='0.09883204686964842'/><Cell N='Y' V='-0.4518581172310991'/></Row><Row T='LineTo' IX='3' Del='1'/></Section></Shape><Shape ID='288' Type='Shape' LineStyle='1' FillStyle='1' TextStyle='8'><Cell N='PinX' V='6.050483602007188'/><Cell N='PinY' V='4.64656764728433'/><Cell N='Width' V='0.5761978189043182'/><Cell N='Height' V='0.1666666666666696'/><Cell N='LocPinX' V='0.2880989094521591' F='Width*0.5'/><Cell N='LocPinY' V='0.08333333333333481' F='Height*0.5'/><Cell N='Angle' V='0'/><Cell N='FlipX' V='0'/><Cell N='FlipY' V='0'/><Cell N='ResizeMode' V='0'/><Cell N='EventDblClick' V='0' F='OPENTEXTWIN()'/><Cell N='LinePattern' V='0' F='THEMEGUARD(0)'/><Cell N='FillPattern' V='0' F='THEMEGUARD(0)'/><Cell N='ShdwPattern' V='0' F='THEMEGUARD(0)'/><Cell N='LineGradientEnabled' V='0' F='THEMEGUARD(FALSE)'/><Cell N='FillGradientEnabled' V='0' F='THEMEGUARD(FALSE)'/><Cell N='QuickStyleVariation' V='3'/><Section N='Character'><Row IX='0'><Cell N='Font' V='Times New Roman'/><Cell N='Size' V='0.1666666666666667' U='PT'/><Cell N='ComplexScriptFont' V='Times New Roman'/></Row></Section><Section N='Geometry' IX='0'><Cell N='NoFill' V='0'/><Cell N='NoLine' V='0'/><Cell N='NoShow' V='0'/><Cell N='NoSnap' V='0'/><Cell N='NoQuickDrag' V='0'/><Row T='RelMoveTo' IX='1'><Cell N='X' V='0'/><Cell N='Y' V='0'/></Row><Row T='RelLineTo' IX='2'><Cell N='X' V='1'/><Cell N='Y' V='0'/></Row><Row T='RelLineTo' IX='3'><Cell N='X' V='1'/><Cell N='Y' V='1'/></Row><Row T='RelLineTo' IX='4'><Cell N='X' V='0'/><Cell N='Y' V='1'/></Row><Row T='RelLineTo' IX='5'><Cell N='X' V='0'/><Cell N='Y' V='0'/></Row></Section><Text><cp IX='0'/>reward
</Text></Shape><Shape ID='292' Type='Shape' LineStyle='1' FillStyle='1' TextStyle='8'><Cell N='PinX' V='2.096456662591847'/><Cell N='PinY' V='6.124782266951785'/><Cell N='Width' V='1.653543313609758'/><Cell N='Height' V='0.1666666666666696'/><Cell N='LocPinX' V='0.8267716568048789' F='Width*0.5'/><Cell N='LocPinY' V='0.08333333333333481' F='Height*0.5'/><Cell N='Angle' V='0'/><Cell N='FlipX' V='0'/><Cell N='FlipY' V='0'/><Cell N='ResizeMode' V='0'/><Cell N='EventDblClick' V='0' F='OPENTEXTWIN()'/><Cell N='LinePattern' V='0' F='THEMEGUARD(0)'/><Cell N='FillPattern' V='0' F='THEMEGUARD(0)'/><Cell N='ShdwPattern' V='0' F='THEMEGUARD(0)'/><Cell N='LineGradientEnabled' V='0' F='THEMEGUARD(FALSE)'/><Cell N='FillGradientEnabled' V='0' F='THEMEGUARD(FALSE)'/><Cell N='QuickStyleVariation' V='3'/><Section N='Character'><Row IX='0'><Cell N='Font' V='Times New Roman'/><Cell N='Size' V='0.1666666666666667' U='PT'/><Cell N='ComplexScriptFont' V='Times New Roman'/></Row><Row IX='1'><Cell N='Font' V='Times New Roman'/><Cell N='Color' V='#000000' F='THEMEVAL("TextColor",RGB(0,0,0))'/><Cell N='Style' V='0' F='THEMEVAL()'/><Cell N='Case' V='0'/><Cell N='Pos' V='0'/><Cell N='FontScale' V='1'/><Cell N='Size' V='0.1666666666666667' U='PT'/><Cell N='DblUnderline' V='0'/><Cell N='Overline' V='0'/><Cell N='Strikethru' V='0'/><Cell N='DoubleStrikethrough' V='0'/><Cell N='Letterspace' V='0'/><Cell N='ColorTrans' V='0'/><Cell N='AsianFont' V='SimSun' F='THEMEVAL()'/><Cell N='ComplexScriptFont' V='Times New Roman'/><Cell N='ComplexScriptSize' V='-1'/><Cell N='LangID' V='en-US'/></Row></Section><Section N='Geometry' IX='0'><Cell N='NoFill' V='0'/><Cell N='NoLine' V='0'/><Cell N='NoShow' V='0'/><Cell N='NoSnap' V='0'/><Cell N='NoQuickDrag' V='0'/><Row T='RelMoveTo' IX='1'><Cell N='X' V='0'/><Cell N='Y' V='0'/></Row><Row T='RelLineTo' IX='2'><Cell N='X' V='1'/><Cell N='Y' V='0'/></Row><Row T='RelLineTo' IX='3'><Cell N='X' V='1'/><Cell N='Y' V='1'/></Row><Row T='RelLineTo' IX='4'><Cell N='X' V='0'/><Cell N='Y' V='1'/></Row><Row T='RelLineTo' IX='5'><Cell N='X' V='0'/><Cell N='Y' V='0'/></Row></Section><Text><cp IX='0'/>feature <cp IX='1'/>extraction
</Text></Shape><Shape ID='304' Type='Shape' LineStyle='1' FillStyle='1' TextStyle='8'><Cell N='PinX' V='6.870078587136558'/><Cell N='PinY' V='6.131889970524005'/><Cell N='Width' V='1.653543313609758'/><Cell N='Height' V='0.1666666666666696'/><Cell N='LocPinX' V='0.8267716568048789' F='Width*0.5'/><Cell N='LocPinY' V='0.08333333333333481' F='Height*0.5'/><Cell N='Angle' V='0'/><Cell N='FlipX' V='0'/><Cell N='FlipY' V='0'/><Cell N='ResizeMode' V='0'/><Cell N='EventDblClick' V='0' F='OPENTEXTWIN()'/><Cell N='LinePattern' V='0' F='THEMEGUARD(0)'/><Cell N='FillPattern' V='0' F='THEMEGUARD(0)'/><Cell N='ShdwPattern' V='0' F='THEMEGUARD(0)'/><Cell N='LineGradientEnabled' V='0' F='THEMEGUARD(FALSE)'/><Cell N='FillGradientEnabled' V='0' F='THEMEGUARD(FALSE)'/><Cell N='SketchEnabled' V='0'/><Section N='Character'><Row IX='0'><Cell N='Font' V='Times New Roman'/><Cell N='Color' V='0'/><Cell N='Style' V='0'/><Cell N='Size' V='0.1666666666666667' U='PT'/><Cell N='AsianFont' V='SimSun'/><Cell N='ComplexScriptFont' V='Times New Roman'/></Row></Section><Section N='Geometry' IX='0'><Cell N='NoFill' V='0'/><Cell N='NoLine' V='0'/><Cell N='NoShow' V='0'/><Cell N='NoSnap' V='0'/><Cell N='NoQuickDrag' V='0'/><Row T='RelMoveTo' IX='1'><Cell N='X' V='0'/><Cell N='Y' V='0'/></Row><Row T='RelLineTo' IX='2'><Cell N='X' V='1'/><Cell N='Y' V='0'/></Row><Row T='RelLineTo' IX='3'><Cell N='X' V='1'/><Cell N='Y' V='1'/></Row><Row T='RelLineTo' IX='4'><Cell N='X' V='0'/><Cell N='Y' V='1'/></Row><Row T='RelLineTo' IX='5'><Cell N='X' V='0'/><Cell N='Y' V='0'/></Row></Section><Text><cp IX='0'/>reinforcement learning
</Text></Shape><Shape ID='315' Type='Group' LineStyle='8' FillStyle='8' TextStyle='8'><Cell N='PinX' V='0.9291337868767814'/><Cell N='PinY' V='5.610236443865144'/><Cell N='Width' V='0.3952327706787523'/><Cell N='Height' V='0.8650915226206111'/><Cell N='LocPinX' V='0.1976163853393761' F='Width*0.5'/><Cell N='LocPinY' V='0.4325457613103055' F='Height*0.5'/><Cell N='Angle' V='0'/><Cell N='FlipX' V='0'/><Cell N='FlipY' V='0'/><Cell N='ResizeMode' V='0'/><Cell N='QuickStyleVariation' V='2'/><Cell N='ObjType' V='9'/><Section N='Character'><Row IX='0'><Cell N='Font' V='Times New Roman'/><Cell N='ComplexScriptFont' V='Times New Roman'/></Row></Section><Shapes><Shape ID='293' Type='Group' LineStyle='8' FillStyle='8' TextStyle='8'><Cell N='PinX' V='0.1936571650880883' F='Sheet.315!Width*0.48998256079705'/><Cell N='PinY' V='0.6862921665667502' F='Sheet.315!Height*0.79331741049522'/><Cell N='Width' V='0.3873143301761765' F='Sheet.315!Width*0.9799651215941'/><Cell N='Height' V='0.3575987121077217' F='Sheet.315!Height*0.41336517900956'/><Cell N='LocPinX' V='0.1936571650880883' F='Width*0.5'/><Cell N='LocPinY' V='0.1787993560538609' F='Height*0.5'/><Cell N='Angle' V='0'/><Cell N='FlipX' V='0'/><Cell N='FlipY' V='0'/><Cell N='ResizeMode' V='0'/><Cell N='QuickStyleVariation' V='2'/><Cell N='ObjType' V='8'/><Section N='Character'><Row IX='0'><Cell N='Font' V='Times New Roman'/><Cell N='ComplexScriptFont' V='Times New Roman'/></Row></Section><Shapes><Shape ID='294' NameU='Rectangle' Name='矩形' Type='Shape' Master='4'><Cell N='PinX' V='0.1789392271830791' F='Sheet.293!Width*0.46200001714805'/><Cell N='PinY' V='0.2598665211858525' F='Sheet.293!Height*0.72669870552434'/><Cell N='Width' V='0.3578784543661581' F='Sheet.293!Width*0.9240000342961'/><Cell N='Height' V='0.1946900105282004' F='Sheet.293!Height*0.54443711326777'/><Cell N='LocPinX' V='0.1789392271830791' F='Inh'/><Cell N='LocPinY' V='0.09734500526410019' F='Inh'/><Cell N='ObjType' V='1'/><Cell N='LineWeight' V='0.01388888888888889' U='PT'/><Section N='Connection'><Row T='Connection' IX='0'><Cell N='X' V='0.1789392271830791' F='Inh'/></Row><Row T='Connection' IX='1'><Cell N='X' V='0.3578784543661581' F='Inh'/><Cell N='Y' V='0.09734500526410019' F='Inh'/></Row><Row T='Connection' IX='2'><Cell N='X' V='0.1789392271830791' F='Inh'/><Cell N='Y' V='0.1946900105282004' F='Inh'/></Row><Row T='Connection' IX='3'><Cell N='Y' V='0.09734500526410019' F='Inh'/></Row><Row T='Connection' IX='4'><Cell N='X' V='0.1789392271830791' F='Inh'/><Cell N='Y' V='0.09734500526410019' F='Inh'/></Row></Section><Section N='Character'><Row IX='0'><Cell N='Font' V='Times New Roman'/><Cell N='ComplexScriptFont' V='Times New Roman'/></Row></Section><Section N='Geometry' IX='0'><Row T='LineTo' IX='2'><Cell N='X' V='0.3578784543661581' F='Inh'/></Row><Row T='LineTo' IX='3'><Cell N='X' V='0.3578784543661581' F='Inh'/><Cell N='Y' V='0.1946900105282004' F='Inh'/></Row><Row T='LineTo' IX='4'><Cell N='Y' V='0.1946900105282004' F='Inh'/></Row></Section></Shape><Shape ID='295' Type='Foreign' LineStyle='2' FillStyle='2' TextStyle='2'><Cell N='PinX' V='0.1791974414404365' F='Sheet.293!Width*0.46266669595965'/><Cell N='PinY' V='0.2598019292805863' F='Sheet.293!Height*0.72651807874052'/><Cell N='Width' V='0.3578784630304494' F='Sheet.293!Width*0.92400005666628'/><Cell N='Height' V='0.1955935656542673' F='Sheet.293!Height*0.54696384251895'/><Cell N='LocPinX' V='0.1789392315152247' F='Width*0.5'/><Cell N='LocPinY' V='0.09779678282713362' F='Height*0.5'/><Cell N='Angle' V='0'/><Cell N='FlipX' V='0'/><Cell N='FlipY' V='0'/><Cell N='ResizeMode' V='0'/><Cell N='ImgOffsetX' V='0' F='ImgWidth*0'/><Cell N='ImgOffsetY' V='0' F='ImgHeight*0'/><Cell N='ImgWidth' V='0.3578784630304494' F='Width*1'/><Cell N='ImgHeight' V='0.1955935656542673' F='Height*1'/><Cell N='ClippingPath' V='' E='#N/A'/><Cell N='TxtPinX' V='0.1789392315152247' F='Width*0.5'/><Cell N='TxtPinY' V='0' F='Height*0'/><Cell N='TxtWidth' V='0.3578784630304494' F='Width*1'/><Cell N='TxtHeight' V='0' F='Height*0'/><Cell N='TxtLocPinX' V='0.1789392315152247' F='TxtWidth*0.5'/><Cell N='TxtLocPinY' V='0' F='TxtHeight*0.5'/><Cell N='TxtAngle' V='0'/><Cell N='VerticalAlign' V='0'/><Section N='Character'><Row IX='0'><Cell N='Font' V='Times New Roman'/><Cell N='ComplexScriptFont' V='Times New Roman'/></Row></Section><Section N='Geometry' IX='0'><Cell N='NoFill' V='0'/><Cell N='NoLine' V='0'/><Cell N='NoShow' V='0'/><Cell N='NoSnap' V='0'/><Cell N='NoQuickDrag' V='0'/><Row T='RelMoveTo' IX='1'><Cell N='X' V='0'/><Cell N='Y' V='0'/></Row><Row T='RelLineTo' IX='2'><Cell N='X' V='1'/><Cell N='Y' V='0'/></Row><Row T='RelLineTo' IX='3'><Cell N='X' V='1'/><Cell N='Y' V='1'/></Row><Row T='RelLineTo' IX='4'><Cell N='X' V='0'/><Cell N='Y' V='1'/></Row><Row T='RelLineTo' IX='5'><Cell N='X' V='0'/><Cell N='Y' V='0'/></Row></Section><ForeignData ForeignType='Bitmap' CompressionType='JPEG' CompressionLevel='0.05'><Rel r:id='rId5'/></ForeignData></Shape><Shape ID='296' NameU='Rectangle.4' IsCustomNameU='1' Name='矩形.4' IsCustomName='1' Type='Shape' Master='4'><Cell N='PinX' V='0.1913332755367174' F='Sheet.293!Width*0.49399999078187'/><Cell N='PinY' V='0.1795632283207961' F='Sheet.293!Height*0.50213611582221'/><Cell N='Width' V='0.3578784489913661' F='Sheet.293!Width*0.92400002041902'/><Cell N='Height' V='0.1955937410612989' F='Sheet.293!Height*0.54696433303255'/><Cell N='LocPinX' V='0.1789392244956831' F='Inh'/><Cell N='LocPinY' V='0.09779687053064944' F='Inh'/><Cell N='ObjType' V='1'/><Cell N='LineWeight' V='0.01388888888888889' U='PT'/><Cell N='SketchEnabled' V='0'/><Section N='Connection'><Row T='Connection' IX='0'><Cell N='X' V='0.1789392244956831' F='Inh'/></Row><Row T='Connection' IX='1'><Cell N='X' V='0.3578784489913661' F='Inh'/><Cell N='Y' V='0.09779687053064944' F='Inh'/></Row><Row T='Connection' IX='2'><Cell N='X' V='0.1789392244956831' F='Inh'/><Cell N='Y' V='0.1955937410612989' F='Inh'/></Row><Row T='Connection' IX='3'><Cell N='Y' V='0.09779687053064944' F='Inh'/></Row><Row T='Connection' IX='4'><Cell N='X' V='0.1789392244956831' F='Inh'/><Cell N='Y' V='0.09779687053064944' F='Inh'/></Row></Section><Section N='Character'><Row IX='0'><Cell N='Font' V='Times New Roman'/><Cell N='Color' V='0'/><Cell N='Style' V='0'/><Cell N='AsianFont' V='SimSun'/><Cell N='ComplexScriptFont' V='Times New Roman'/></Row></Section><Section N='Geometry' IX='0'><Row T='LineTo' IX='2'><Cell N='X' V='0.3578784489913661' F='Inh'/></Row><Row T='LineTo' IX='3'><Cell N='X' V='0.3578784489913661' F='Inh'/><Cell N='Y' V='0.1955937410612989' F='Inh'/></Row><Row T='LineTo' IX='4'><Cell N='Y' V='0.1955937410612989' F='Inh'/></Row></Section></Shape><Shape ID='297' Type='Foreign' LineStyle='2' FillStyle='2' TextStyle='2'><Cell N='PinX' V='0.1913332852392667' F='Sheet.293!Width*0.49400001583271'/><Cell N='PinY' V='0.1798215566450809' F='Sheet.293!Height*0.50285851306677'/><Cell N='Width' V='0.354779941548701' F='Sheet.293!Width*0.91600003900533'/><Cell N='Height' V='0.191591495771783' F='Sheet.293!Height*0.53577233162425'/><Cell N='LocPinX' V='0.1773899707743505' F='Width*0.5'/><Cell N='LocPinY' V='0.09579574788589149' F='Height*0.5'/><Cell N='Angle' V='0'/><Cell N='FlipX' V='0'/><Cell N='FlipY' V='0'/><Cell N='ResizeMode' V='0'/><Cell N='ImgOffsetX' V='0' F='ImgWidth*0'/><Cell N='ImgOffsetY' V='0' F='ImgHeight*0'/><Cell N='ImgWidth' V='0.354779941548701' F='Width*1'/><Cell N='ImgHeight' V='0.191591495771783' F='Height*1'/><Cell N='ClippingPath' V='' E='#N/A'/><Cell N='TxtPinX' V='0.1773899707743505' F='Width*0.5'/><Cell N='TxtPinY' V='0' F='Height*0'/><Cell N='TxtWidth' V='0.354779941548701' F='Width*1'/><Cell N='TxtHeight' V='0' F='Height*0'/><Cell N='TxtLocPinX' V='0.1773899707743505' F='TxtWidth*0.5'/><Cell N='TxtLocPinY' V='0' F='TxtHeight*0.5'/><Cell N='TxtAngle' V='0'/><Cell N='VerticalAlign' V='0'/><Section N='Character'><Row IX='0'><Cell N='Font' V='Times New Roman'/><Cell N='ComplexScriptFont' V='Times New Roman'/></Row></Section><Section N='Geometry' IX='0'><Cell N='NoFill' V='0'/><Cell N='NoLine' V='0'/><Cell N='NoShow' V='0'/><Cell N='NoSnap' V='0'/><Cell N='NoQuickDrag' V='0'/><Row T='RelMoveTo' IX='1'><Cell N='X' V='0'/><Cell N='Y' V='0'/></Row><Row T='RelLineTo' IX='2'><Cell N='X' V='1'/><Cell N='Y' V='0'/></Row><Row T='RelLineTo' IX='3'><Cell N='X' V='1'/><Cell N='Y' V='1'/></Row><Row T='RelLineTo' IX='4'><Cell N='X' V='0'/><Cell N='Y' V='1'/></Row><Row T='RelLineTo' IX='5'><Cell N='X' V='0'/><Cell N='Y' V='0'/></Row></Section><ForeignData ForeignType='Bitmap' CompressionType='JPEG' CompressionLevel='0.05'><Rel r:id='rId7'/></ForeignData></Shape><Shape ID='298' NameU='Rectangle.5' IsCustomNameU='1' Name='矩形.5' IsCustomName='1' Type='Shape' Master='4'><Cell N='PinX' V='0.2083751056804934' F='Sheet.293!Width*0.53799998979049'/><Cell N='PinY' V='0.09779687053064765' F='Sheet.293!Height*0.27348216651627'/><Cell N='Width' V='0.3578784489913661' F='Sheet.293!Width*0.92400002041902'/><Cell N='Height' V='0.1955937410612989' F='Sheet.293!Height*0.54696433303255'/><Cell N='LocPinX' V='0.1789392244956831' F='Inh'/><Cell N='LocPinY' V='0.09779687053064944' F='Inh'/><Cell N='ObjType' V='1'/><Cell N='LineWeight' V='0.01388888888888889' U='PT'/><Cell N='SketchEnabled' V='0'/><Section N='Connection'><Row T='Connection' IX='0'><Cell N='X' V='0.1789392244956831' F='Inh'/></Row><Row T='Connection' IX='1'><Cell N='X' V='0.3578784489913661' F='Inh'/><Cell N='Y' V='0.09779687053064944' F='Inh'/></Row><Row T='Connection' IX='2'><Cell N='X' V='0.1789392244956831' F='Inh'/><Cell N='Y' V='0.1955937410612989' F='Inh'/></Row><Row T='Connection' IX='3'><Cell N='Y' V='0.09779687053064944' F='Inh'/></Row><Row T='Connection' IX='4'><Cell N='X' V='0.1789392244956831' F='Inh'/><Cell N='Y' V='0.09779687053064944' F='Inh'/></Row></Section><Section N='Character'><Row IX='0'><Cell N='Font' V='Times New Roman'/><Cell N='Color' V='0'/><Cell N='Style' V='0'/><Cell N='AsianFont' V='SimSun'/><Cell N='ComplexScriptFont' V='Times New Roman'/></Row></Section><Section N='Geometry' IX='0'><Row T='LineTo' IX='2'><Cell N='X' V='0.3578784489913661' F='Inh'/></Row><Row T='LineTo' IX='3'><Cell N='X' V='0.3578784489913661' F='Inh'/><Cell N='Y' V='0.1955937410612989' F='Inh'/></Row><Row T='LineTo' IX='4'><Cell N='Y' V='0.1955937410612989' F='Inh'/></Row></Section></Shape><Shape ID='299' Type='Foreign' LineStyle='2' FillStyle='2' TextStyle='2'><Cell N='PinX' V='0.2085687745413162' F='Sheet.293!Width*0.5385000199875'/><Cell N='PinY' V='0.09848554428913539' F='Sheet.293!Height*0.2754079949244'/><Cell N='Width' V='0.3543926252651902' F='Sheet.293!Width*0.91500003396205'/><Cell N='Height' V='0.1931407531499917' F='Sheet.293!Height*0.54010472244601'/><Cell N='LocPinX' V='0.1771963126325951' F='Width*0.5'/><Cell N='LocPinY' V='0.09657037657499584' F='Height*0.5'/><Cell N='Angle' V='0'/><Cell N='FlipX' V='0'/><Cell N='FlipY' V='0'/><Cell N='ResizeMode' V='0'/><Cell N='ImgOffsetX' V='0' F='ImgWidth*0'/><Cell N='ImgOffsetY' V='0' F='ImgHeight*0'/><Cell N='ImgWidth' V='0.3543926252651902' F='Width*1'/><Cell N='ImgHeight' V='0.1931407531499917' F='Height*1'/><Cell N='ClippingPath' V='' E='#N/A'/><Cell N='TxtPinX' V='0.1771963126325951' F='Width*0.5'/><Cell N='TxtPinY' V='0' F='Height*0'/><Cell N='TxtWidth' V='0.3543926252651902' F='Width*1'/><Cell N='TxtHeight' V='0' F='Height*0'/><Cell N='TxtLocPinX' V='0.1771963126325951' F='TxtWidth*0.5'/><Cell N='TxtLocPinY' V='0' F='TxtHeight*0.5'/><Cell N='TxtAngle' V='0'/><Cell N='VerticalAlign' V='0'/><Section N='Character'><Row IX='0'><Cell N='Font' V='Times New Roman'/><Cell N='ComplexScriptFont' V='Times New Roman'/></Row></Section><Section N='Geometry' IX='0'><Cell N='NoFill' V='0'/><Cell N='NoLine' V='0'/><Cell N='NoShow' V='0'/><Cell N='NoSnap' V='0'/><Cell N='NoQuickDrag' V='0'/><Row T='RelMoveTo' IX='1'><Cell N='X' V='0'/><Cell N='Y' V='0'/></Row><Row T='RelLineTo' IX='2'><Cell N='X' V='1'/><Cell N='Y' V='0'/></Row><Row T='RelLineTo' IX='3'><Cell N='X' V='1'/><Cell N='Y' V='1'/></Row><Row T='RelLineTo' IX='4'><Cell N='X' V='0'/><Cell N='Y' V='1'/></Row><Row T='RelLineTo' IX='5'><Cell N='X' V='0'/><Cell N='Y' V='0'/></Row></Section><ForeignData ForeignType='Bitmap' CompressionType='JPEG' CompressionLevel='0.05'><Rel r:id='rId9'/></ForeignData></Shape></Shapes></Shape><Shape ID='305' Type='Group' LineStyle='8' FillStyle='8' TextStyle='8'><Cell N='PinX' V='0.1936579561052441' F='Sheet.315!Width*0.48998456219272'/><Cell N='PinY' V='0.1787997536771837' F='Sheet.315!Height*0.20668304913629'/><Cell N='Width' V='0.3873127481418727' F='Sheet.315!Width*0.97996111880278'/><Cell N='Height' V='0.3575995073543587' F='Sheet.315!Height*0.41336609827257'/><Cell N='LocPinX' V='0.1936563740709363' F='Width*0.5'/><Cell N='LocPinY' V='0.1787997536771794' F='Height*0.5'/><Cell N='Angle' V='0'/><Cell N='FlipX' V='0'/><Cell N='FlipY' V='0'/><Cell N='ResizeMode' V='0'/><Cell N='QuickStyleVariation' V='2'/><Cell N='ObjType' V='8'/><Section N='Character'><Row IX='0'><Cell N='Font' V='Times New Roman'/><Cell N='ComplexScriptFont' V='Times New Roman'/></Row></Section><Shapes><Shape ID='306' NameU='Rectangle.44' IsCustomNameU='1' Name='矩形.44' IsCustomName='1' Type='Shape' Master='4'><Cell N='PinX' V='0.1782255868855924' F='Sheet.305!Width*0.46015936149953'/><Cell N='PinY' V='0.2590373615567493' F='Sheet.305!Height*0.72437840721089'/><Cell N='Width' V='0.3564511737711887' F='Sheet.305!Width*0.92031872299907'/><Cell N='Height' V='0.1971242915952188' F='Sheet.305!Height*0.55124318557822'/><Cell N='LocPinX' V='0.1782255868855943' F='Inh'/><Cell N='LocPinY' V='0.09856214579760941' F='Inh'/><Cell N='ObjType' V='1'/><Cell N='LineWeight' V='0.01388888888888889' U='PT'/><Cell N='SketchEnabled' V='0'/><Section N='Connection'><Row T='Connection' IX='0'><Cell N='X' V='0.1782255868855943' F='Inh'/></Row><Row T='Connection' IX='1'><Cell N='X' V='0.3564511737711887' F='Inh'/><Cell N='Y' V='0.09856214579760941' F='Inh'/></Row><Row T='Connection' IX='2'><Cell N='X' V='0.1782255868855943' F='Inh'/><Cell N='Y' V='0.1971242915952188' F='Inh'/></Row><Row T='Connection' IX='3'><Cell N='Y' V='0.09856214579760941' F='Inh'/></Row><Row T='Connection' IX='4'><Cell N='X' V='0.1782255868855943' F='Inh'/><Cell N='Y' V='0.09856214579760941' F='Inh'/></Row></Section><Section N='Character'><Row IX='0'><Cell N='Font' V='Times New Roman'/><Cell N='Color' V='0'/><Cell N='Style' V='0'/><Cell N='AsianFont' V='SimSun'/><Cell N='ComplexScriptFont' V='Times New Roman'/></Row></Section><Section N='Geometry' IX='0'><Row T='LineTo' IX='2'><Cell N='X' V='0.3564511737711887' F='Inh'/></Row><Row T='LineTo' IX='3'><Cell N='X' V='0.3564511737711887' F='Inh'/><Cell N='Y' V='0.1971242915952188' F='Inh'/></Row><Row T='LineTo' IX='4'><Cell N='Y' V='0.1971242915952188' F='Inh'/></Row></Section></Shape><Shape ID='307' Type='Foreign' LineStyle='2' FillStyle='2' TextStyle='2'><Cell N='PinX' V='0.1779684191651142' F='Sheet.305!Width*0.45949538201083'/><Cell N='PinY' V='0.2590374575534788' F='Sheet.305!Height*0.72437867565849'/><Cell N='Width' V='0.3538793812953661' F='Sheet.305!Width*0.9136786304946'/><Cell N='Height' V='0.1936111883161193' F='Sheet.305!Height*0.54141905772891'/><Cell N='LocPinX' V='0.1769396906476831' F='Width*0.5'/><Cell N='LocPinY' V='0.09680559415805964' F='Height*0.5'/><Cell N='Angle' V='0'/><Cell N='FlipX' V='0'/><Cell N='FlipY' V='0'/><Cell N='ResizeMode' V='0'/><Cell N='ImgOffsetX' V='0' F='ImgWidth*0'/><Cell N='ImgOffsetY' V='0' F='ImgHeight*0'/><Cell N='ImgWidth' V='0.3538793812953661' F='Width*1'/><Cell N='ImgHeight' V='0.1936111883161193' F='Height*1'/><Cell N='ClippingPath' V='' E='#N/A'/><Cell N='TxtPinX' V='0.1769396906476831' F='Width*0.5'/><Cell N='TxtPinY' V='0' F='Height*0'/><Cell N='TxtWidth' V='0.3538793812953661' F='Width*1'/><Cell N='TxtHeight' V='0' F='Height*0'/><Cell N='TxtLocPinX' V='0.1769396906476831' F='TxtWidth*0.5'/><Cell N='TxtLocPinY' V='0' F='TxtHeight*0.5'/><Cell N='TxtAngle' V='0'/><Cell N='VerticalAlign' V='0'/><Section N='Character'><Row IX='0'><Cell N='Font' V='Times New Roman'/><Cell N='ComplexScriptFont' V='Times New Roman'/></Row></Section><Section N='Geometry' IX='0'><Cell N='NoFill' V='0'/><Cell N='NoLine' V='0'/><Cell N='NoShow' V='0'/><Cell N='NoSnap' V='0'/><Cell N='NoQuickDrag' V='0'/><Row T='RelMoveTo' IX='1'><Cell N='X' V='0'/><Cell N='Y' V='0'/></Row><Row T='RelLineTo' IX='2'><Cell N='X' V='1'/><Cell N='Y' V='0'/></Row><Row T='RelLineTo' IX='3'><Cell N='X' V='1'/><Cell N='Y' V='1'/></Row><Row T='RelLineTo' IX='4'><Cell N='X' V='0'/><Cell N='Y' V='1'/></Row><Row T='RelLineTo' IX='5'><Cell N='X' V='0'/><Cell N='Y' V='0'/></Row></Section><ForeignData ForeignType='Bitmap' CompressionType='JPEG' CompressionLevel='0.05'><Rel r:id='rId11'/></ForeignData></Shape><Shape ID='308' NameU='Rectangle.46' IsCustomNameU='1' Name='矩形.46' IsCustomName='1' Type='Shape' Master='4'><Cell N='PinX' V='0.1921132965961434' F='Sheet.305!Width*0.49601593936116'/><Cell N='PinY' V='0.1809683376739245' F='Sheet.305!Height*0.50606428127597'/><Cell N='Width' V='0.3564511737711887' F='Sheet.305!Width*0.92031872299907'/><Cell N='Height' V='0.1971242915952188' F='Sheet.305!Height*0.55124318557822'/><Cell N='LocPinX' V='0.1782255868855943' F='Inh'/><Cell N='LocPinY' V='0.09856214579760941' F='Inh'/><Cell N='ObjType' V='1'/><Cell N='LineWeight' V='0.01388888888888889' U='PT'/><Cell N='SketchEnabled' V='0'/><Section N='Connection'><Row T='Connection' IX='0'><Cell N='X' V='0.1782255868855943' F='Inh'/></Row><Row T='Connection' IX='1'><Cell N='X' V='0.3564511737711887' F='Inh'/><Cell N='Y' V='0.09856214579760941' F='Inh'/></Row><Row T='Connection' IX='2'><Cell N='X' V='0.1782255868855943' F='Inh'/><Cell N='Y' V='0.1971242915952188' F='Inh'/></Row><Row T='Connection' IX='3'><Cell N='Y' V='0.09856214579760941' F='Inh'/></Row><Row T='Connection' IX='4'><Cell N='X' V='0.1782255868855943' F='Inh'/><Cell N='Y' V='0.09856214579760941' F='Inh'/></Row></Section><Section N='Character'><Row IX='0'><Cell N='Font' V='Times New Roman'/><Cell N='Color' V='0'/><Cell N='Style' V='0'/><Cell N='AsianFont' V='SimSun'/><Cell N='ComplexScriptFont' V='Times New Roman'/></Row></Section><Section N='Geometry' IX='0'><Row T='LineTo' IX='2'><Cell N='X' V='0.3564511737711887' F='Inh'/></Row><Row T='LineTo' IX='3'><Cell N='X' V='0.3564511737711887' F='Inh'/><Cell N='Y' V='0.1971242915952188' F='Inh'/></Row><Row T='LineTo' IX='4'><Cell N='Y' V='0.1971242915952188' F='Inh'/></Row></Section></Shape><Shape ID='309' Type='Foreign' LineStyle='2' FillStyle='2' TextStyle='2'><Cell N='PinX' V='0.1918561323520759' F='Sheet.305!Width*0.49535196884818'/><Cell N='PinY' V='0.1811849860325409' F='Sheet.305!Height*0.50667012203962'/><Cell N='Width' V='0.3528506691364376' F='Sheet.305!Width*0.91102260596697'/><Cell N='Height' V='0.1944607027702603' F='Sheet.305!Height*0.54379466070562'/><Cell N='LocPinX' V='0.1764253345682188' F='Width*0.5'/><Cell N='LocPinY' V='0.09723035138513017' F='Height*0.5'/><Cell N='Angle' V='0'/><Cell N='FlipX' V='0'/><Cell N='FlipY' V='0'/><Cell N='ResizeMode' V='0'/><Cell N='ImgOffsetX' V='0' F='ImgWidth*0'/><Cell N='ImgOffsetY' V='0' F='ImgHeight*0'/><Cell N='ImgWidth' V='0.3528506691364376' F='Width*1'/><Cell N='ImgHeight' V='0.1944607027702603' F='Height*1'/><Cell N='ClippingPath' V='' E='#N/A'/><Cell N='TxtPinX' V='0.1764253345682188' F='Width*0.5'/><Cell N='TxtPinY' V='0' F='Height*0'/><Cell N='TxtWidth' V='0.3528506691364376' F='Width*1'/><Cell N='TxtHeight' V='0' F='Height*0'/><Cell N='TxtLocPinX' V='0.1764253345682188' F='TxtWidth*0.5'/><Cell N='TxtLocPinY' V='0' F='TxtHeight*0.5'/><Cell N='TxtAngle' V='0'/><Cell N='VerticalAlign' V='0'/><Section N='Character'><Row IX='0'><Cell N='Font' V='Times New Roman'/><Cell N='ComplexScriptFont' V='Times New Roman'/></Row></Section><Section N='Geometry' IX='0'><Cell N='NoFill' V='0'/><Cell N='NoLine' V='0'/><Cell N='NoShow' V='0'/><Cell N='NoSnap' V='0'/><Cell N='NoQuickDrag' V='0'/><Row T='RelMoveTo' IX='1'><Cell N='X' V='0'/><Cell N='Y' V='0'/></Row><Row T='RelLineTo' IX='2'><Cell N='X' V='1'/><Cell N='Y' V='0'/></Row><Row T='RelLineTo' IX='3'><Cell N='X' V='1'/><Cell N='Y' V='1'/></Row><Row T='RelLineTo' IX='4'><Cell N='X' V='0'/><Cell N='Y' V='1'/></Row><Row T='RelLineTo' IX='5'><Cell N='X' V='0'/><Cell N='Y' V='0'/></Row></Section><ForeignData ForeignType='Bitmap' CompressionType='JPEG' CompressionLevel='0.05'><Rel r:id='rId12'/></ForeignData></Shape><Shape ID='310' NameU='Rectangle.48' IsCustomNameU='1' Name='矩形.48' IsCustomName='1' Type='Shape' Master='4'><Cell N='PinX' V='0.2090871612562803' F='Sheet.305!Width*0.53984063850047'/><Cell N='PinY' V='0.09856214579760941' F='Sheet.305!Height*0.27562159278911'/><Cell N='Width' V='0.3564511737711887' F='Sheet.305!Width*0.92031872299907'/><Cell N='Height' V='0.1971242915952188' F='Sheet.305!Height*0.55124318557822'/><Cell N='LocPinX' V='0.1782255868855943' F='Inh'/><Cell N='LocPinY' V='0.09856214579760941' F='Inh'/><Cell N='ObjType' V='1'/><Cell N='LineWeight' V='0.01388888888888889' U='PT'/><Cell N='SketchEnabled' V='0'/><Section N='Connection'><Row T='Connection' IX='0'><Cell N='X' V='0.1782255868855943' F='Inh'/></Row><Row T='Connection' IX='1'><Cell N='X' V='0.3564511737711887' F='Inh'/><Cell N='Y' V='0.09856214579760941' F='Inh'/></Row><Row T='Connection' IX='2'><Cell N='X' V='0.1782255868855943' F='Inh'/><Cell N='Y' V='0.1971242915952188' F='Inh'/></Row><Row T='Connection' IX='3'><Cell N='Y' V='0.09856214579760941' F='Inh'/></Row><Row T='Connection' IX='4'><Cell N='X' V='0.1782255868855943' F='Inh'/><Cell N='Y' V='0.09856214579760941' F='Inh'/></Row></Section><Section N='Character'><Row IX='0'><Cell N='Font' V='Times New Roman'/><Cell N='Color' V='0'/><Cell N='Style' V='0'/><Cell N='AsianFont' V='SimSun'/><Cell N='ComplexScriptFont' V='Times New Roman'/></Row></Section><Section N='Geometry' IX='0'><Row T='LineTo' IX='2'><Cell N='X' V='0.3564511737711887' F='Inh'/></Row><Row T='LineTo' IX='3'><Cell N='X' V='0.3564511737711887' F='Inh'/><Cell N='Y' V='0.1971242915952188' F='Inh'/></Row><Row T='LineTo' IX='4'><Cell N='Y' V='0.1971242915952188' F='Inh'/></Row></Section></Shape><Shape ID='311' Type='Foreign' LineStyle='2' FillStyle='2' TextStyle='2'><Cell N='PinX' V='0.2092157639208631' F='Sheet.305!Width*0.54017267679562'/><Cell N='PinY' V='0.09919109109831255' F='Sheet.305!Height*0.27738039079573'/><Cell N='Width' V='0.353107857166903' F='Sheet.305!Width*0.91168663789388'/><Cell N='Height' V='0.1945219668993921' F='Sheet.305!Height*0.54396598121326'/><Cell N='LocPinX' V='0.1765539285834515' F='Width*0.5'/><Cell N='LocPinY' V='0.09726098344969605' F='Height*0.5'/><Cell N='Angle' V='0'/><Cell N='FlipX' V='0'/><Cell N='FlipY' V='0'/><Cell N='ResizeMode' V='0'/><Cell N='ImgOffsetX' V='0' F='ImgWidth*0'/><Cell N='ImgOffsetY' V='0' F='ImgHeight*0'/><Cell N='ImgWidth' V='0.353107857166903' F='Width*1'/><Cell N='ImgHeight' V='0.1945219668993921' F='Height*1'/><Cell N='ClippingPath' V='' E='#N/A'/><Cell N='TxtPinX' V='0.1765539285834515' F='Width*0.5'/><Cell N='TxtPinY' V='0' F='Height*0'/><Cell N='TxtWidth' V='0.353107857166903' F='Width*1'/><Cell N='TxtHeight' V='0' F='Height*0'/><Cell N='TxtLocPinX' V='0.1765539285834515' F='TxtWidth*0.5'/><Cell N='TxtLocPinY' V='0' F='TxtHeight*0.5'/><Cell N='TxtAngle' V='0'/><Cell N='VerticalAlign' V='0'/><Section N='Character'><Row IX='0'><Cell N='Font' V='Times New Roman'/><Cell N='ComplexScriptFont' V='Times New Roman'/></Row></Section><Section N='Geometry' IX='0'><Cell N='NoFill' V='0'/><Cell N='NoLine' V='0'/><Cell N='NoShow' V='0'/><Cell N='NoSnap' V='0'/><Cell N='NoQuickDrag' V='0'/><Row T='RelMoveTo' IX='1'><Cell N='X' V='0'/><Cell N='Y' V='0'/></Row><Row T='RelLineTo' IX='2'><Cell N='X' V='1'/><Cell N='Y' V='0'/></Row><Row T='RelLineTo' IX='3'><Cell N='X' V='1'/><Cell N='Y' V='1'/></Row><Row T='RelLineTo' IX='4'><Cell N='X' V='0'/><Cell N='Y' V='1'/></Row><Row T='RelLineTo' IX='5'><Cell N='X' V='0'/><Cell N='Y' V='0'/></Row></Section><ForeignData ForeignType='Bitmap' CompressionType='JPEG' CompressionLevel='0.05'><Rel r:id='rId13'/></ForeignData></Shape></Shapes></Shape><Shape ID='312' Type='Shape' LineStyle='1' FillStyle='1' TextStyle='8'><Cell N='PinX' V='0.1976171763565281' F='Sheet.315!Width*0.50000200139566'/><Cell N='PinY' V='0.4228653071620547' F='Sheet.315!Height*0.48880990751253'/><Cell N='Width' V='0.3952311886444445' F='Sheet.315!Width*0.99999599720867'/><Cell N='Height' V='0.6053909191287982' F='Sheet.315!Height*0.69979985157512'/><Cell N='LocPinX' V='0.1976155943222223' F='Width*0.5'/><Cell N='LocPinY' V='0.3026954595643991' F='Height*0.5'/><Cell N='Angle' V='0'/><Cell N='FlipX' V='0'/><Cell N='FlipY' V='0'/><Cell N='ResizeMode' V='0'/><Cell N='EventDblClick' V='0' F='OPENTEXTWIN()'/><Cell N='TextDirection' V='1'/><Cell N='LinePattern' V='0' F='THEMEGUARD(0)'/><Cell N='FillPattern' V='0' F='THEMEGUARD(0)'/><Cell N='ShdwPattern' V='0' F='THEMEGUARD(0)'/><Cell N='LineGradientEnabled' V='0' F='THEMEGUARD(FALSE)'/><Cell N='FillGradientEnabled' V='0' F='THEMEGUARD(FALSE)'/><Cell N='QuickStyleVariation' V='3'/><Section N='Character'><Row IX='0'><Cell N='Font' V='Times New Roman'/><Cell N='Size' V='0.08333333333333333' U='PT'/><Cell N='ComplexScriptFont' V='Times New Roman'/></Row></Section><Section N='Geometry' IX='0'><Cell N='NoFill' V='0'/><Cell N='NoLine' V='0'/><Cell N='NoShow' V='0'/><Cell N='NoSnap' V='0'/><Cell N='NoQuickDrag' V='0'/><Row T='RelMoveTo' IX='1'><Cell N='X' V='0'/><Cell N='Y' V='0'/></Row><Row T='RelLineTo' IX='2'><Cell N='X' V='1'/><Cell N='Y' V='0'/></Row><Row T='RelLineTo' IX='3'><Cell N='X' V='1'/><Cell N='Y' V='1'/></Row><Row T='RelLineTo' IX='4'><Cell N='X' V='0'/><Cell N='Y' V='1'/></Row><Row T='RelLineTo' IX='5'><Cell N='X' V='0'/><Cell N='Y' V='0'/></Row></Section><Text><cp IX='0'/>...
</Text></Shape></Shapes></Shape><Shape ID='317' NameU='Dynamic connector.317' Name='动态连接线.317' Type='Shape' Master='5'><Cell N='PinX' V='1.362692167250881' U='MM' F='Inh'/><Cell N='PinY' V='5.662563784678945' F='Inh'/><Cell N='Width' V='0.2938627104336367' U='MM' F='GUARD(EndX-BeginX)'/><Cell N='Height' V='0.1968503937007874' F='GUARD(0.19685039370079DL)'/><Cell N='LocPinX' V='0.1469313552168183' U='MM' F='Inh'/><Cell N='LocPinY' V='0.098425196850395' F='Inh'/><Cell N='BeginX' V='1.215760812034063'/><Cell N='BeginY' V='5.580709229082375'/><Cell N='EndX' V='1.5096235224677' U='MM' F='PAR(PNT(Sheet.332!Connections.X4,Sheet.332!Connections.Y4))'/><Cell N='EndY' V='5.744418340275514' F='PAR(PNT(Sheet.332!Connections.X4,Sheet.332!Connections.Y4))'/><Cell N='LayerMember' V='0'/><Cell N='BegTrigger' V='1' F='_XFTRIGGER(EventXFMod)'/><Cell N='EndTrigger' V='2' F='_XFTRIGGER(Sheet.332!EventXFMod)'/><Cell N='TxtPinX' V='0.1469313502311707' F='Inh'/><Cell N='TxtPinY' V='0.09842519368976355' F='Inh'/><Cell N='ConFixedCode' V='3'/><Section N='Control'><Row N='TextPosition'><Cell N='X' V='0.1469313502311707'/><Cell N='Y' V='0.09842519368976353'/><Cell N='XDyn' V='0.1469313502311707' F='Inh'/><Cell N='YDyn' V='0.09842519368976355' F='Inh'/></Row></Section><Section N='Character'><Row IX='0'><Cell N='Font' V='Times New Roman'/><Cell N='ComplexScriptFont' V='Times New Roman'/></Row></Section><Section N='Geometry' IX='0'><Row T='MoveTo' IX='1'><Cell N='Y' V='0.01657064125382401'/></Row><Row T='LineTo' IX='2'><Cell N='X' V='0.2938627104336364'/><Cell N='Y' V='0.180279752446963'/></Row><Row T='LineTo' IX='3' Del='1'/></Section></Shape><Shape ID='318' Type='Group' LineStyle='8' FillStyle='8' TextStyle='8'><Cell N='PinX' V='3.187444294934163'/><Cell N='PinY' V='5.580709229082375'/><Cell N='Width' V='0.4755049654643859'/><Cell N='Height' V='0.5332916395535285'/><Cell N='LocPinX' V='0.237752482732193' F='Width*0.5'/><Cell N='LocPinY' V='0.2666458197767643' F='Height*0.5'/><Cell N='Angle' V='0'/><Cell N='FlipX' V='0'/><Cell N='FlipY' V='0'/><Cell N='ResizeMode' V='0'/><Cell N='QuickStyleVariation' V='2'/><Cell N='ObjType' V='8'/><Section N='Character'><Row IX='0'><Cell N='Font' V='Times New Roman'/><Cell N='ComplexScriptFont' V='Times New Roman'/></Row></Section><Shapes><Shape ID='219' NameU='Rectangle.56' IsCustomNameU='1' Name='矩形.56' IsCustomName='1' Type='Shape' Master='4'><Cell N='PinX' V='0.237752482732193' F='Sheet.318!Width*0.5'/><Cell N='PinY' V='0.2666458197767643' F='Sheet.318!Height*0.5'/><Cell N='Width' V='0.475504965464386' F='Sheet.318!Width*1'/><Cell N='Height' V='0.5332916395535278' F='Sheet.318!Height*1'/><Cell N='LocPinX' V='0.237752482732193' F='Inh'/><Cell N='LocPinY' V='0.2666458197767638' F='Inh'/><Cell N='ObjType' V='1'/><Cell N='SketchEnabled' V='0'/><Cell N='FillForegnd' V='#ebf1df' F='THEMEGUARD(MSOTINT(THEMEVAL("AccentColor2"),80))'/><Cell N='FillBkgnd' V='#f0f4e8' F='THEMEGUARD(SHADE(FillForegnd,LUMDIFF(THEMEVAL("FillColor"),THEMEVAL("FillColor2"))))'/><Cell N='ShapeShdwShow' V='2'/><Cell N='FillGradientEnabled' V='0'/><Section N='Connection'><Row T='Connection' IX='0'><Cell N='X' V='0.237752482732193' F='Inh'/></Row><Row T='Connection' IX='1'><Cell N='X' V='0.475504965464386' F='Inh'/><Cell N='Y' V='0.2666458197767638' F='Inh'/></Row><Row T='Connection' IX='2'><Cell N='X' V='0.237752482732193' F='Inh'/><Cell N='Y' V='0.5332916395535277' F='Inh'/></Row><Row T='Connection' IX='3'><Cell N='Y' V='0.2666458197767638' F='Inh'/></Row><Row T='Connection' IX='4'><Cell N='X' V='0.237752482732193' F='Inh'/><Cell N='Y' V='0.2666458197767638' F='Inh'/></Row></Section><Section N='Character'><Row IX='0'><Cell N='Font' V='Times New Roman'/><Cell N='Color' V='0'/><Cell N='Style' V='0'/><Cell N='Size' V='0.1666666666666667' U='PT'/><Cell N='AsianFont' V='SimSun'/><Cell N='ComplexScriptFont' V='Times New Roman'/></Row></Section><Section N='Geometry' IX='0'><Row T='LineTo' IX='2'><Cell N='X' V='0.475504965464386' F='Inh'/></Row><Row T='LineTo' IX='3'><Cell N='X' V='0.475504965464386' F='Inh'/><Cell N='Y' V='0.5332916395535277' F='Inh'/></Row><Row T='LineTo' IX='4'><Cell N='Y' V='0.5332916395535277' F='Inh'/></Row></Section><Text><cp IX='0'/></Text></Shape><Shape ID='220' NameU='Circle' Name='圆形' Type='Shape' Master='10'><Cell N='PinX' V='0.07497162956531378' F='Sheet.318!Width*0.15766739573812'/><Cell N='PinY' V='0.3997737751449542' F='Sheet.318!Height*0.74963443169603'/><Cell N='Width' V='0.0555125187913327' F='Sheet.318!Width*0.11674435142253'/><Cell N='Height' V='0.1064028180687955' F='Sheet.318!Height*0.19952088159094'/><Cell N='LocPinX' V='0.02775625939566635' F='Inh'/><Cell N='LocPinY' V='0.05320140903439774' F='Inh'/><Cell N='TxtPinX' V='0.02775625939566635' F='Inh'/><Cell N='TxtPinY' V='0.05320140903439774' F='Inh'/><Cell N='TxtWidth' V='0.04857345394241611' F='Inh'/><Cell N='TxtHeight' V='0.07980211355159661' F='Inh'/><Cell N='TxtLocPinX' V='0.02428672697120806' F='Inh'/><Cell N='TxtLocPinY' V='0.03990105677579831' F='Inh'/><Cell N='FillForegnd' V='#dbeef3' F='THEMEGUARD(MSOTINT(THEMEVAL("AccentColor4"),80))'/><Cell N='FillBkgnd' V='#e4f2f5' F='THEMEGUARD(SHADE(FillForegnd,LUMDIFF(THEMEVAL("FillColor"),THEMEVAL("FillColor2"))))'/><Cell N='ShapeShdwShow' V='2'/><Cell N='FillGradientEnabled' V='0'/><Section N='Connection'><Row T='Connection' IX='0'><Cell N='X' V='0.02775625939566635' F='Inh'/><Cell N='Y' V='0.1064028180687955' F='Inh'/></Row><Row T='Connection' IX='1'><Cell N='X' V='0.02775625939566635' F='Inh'/><Cell N='Y' V='0.05320140903439774' F='Inh'/></Row><Row T='Connection' IX='2'><Cell N='Y' V='0.05320140903439774' F='Inh'/></Row><Row T='Connection' IX='3'><Cell N='X' V='0.02775625939566635' F='Inh'/></Row><Row T='Connection' IX='4'><Cell N='X' V='0.0555125187913327' F='Inh'/><Cell N='Y' V='0.05320140903439774' F='Inh'/></Row><Row T='Connection' IX='5'><Cell N='X' V='0.008127032751051108' F='Inh'/><Cell N='Y' V='0.01557737256527166' F='Inh'/></Row><Row T='Connection' IX='6'><Cell N='X' V='0.0473854860402816' F='Inh'/><Cell N='Y' V='0.01557737256527166' F='Inh'/></Row><Row T='Connection' IX='7'><Cell N='X' V='0.0473854860402816' F='Inh'/><Cell N='Y' V='0.09082544550352383' F='Inh'/></Row><Row T='Connection' IX='8'><Cell N='X' V='0.008127032751051108' F='Inh'/><Cell N='Y' V='0.09082544550352383' F='Inh'/></Row></Section><Section N='Character'><Row IX='0'><Cell N='Font' V='Times New Roman'/><Cell N='Color' V='#00b0f0' F='THEMEGUARD(RGB(0,176,240))'/><Cell N='ComplexScriptFont' V='Times New Roman'/></Row></Section><Section N='Geometry' IX='0'><Row T='MoveTo' IX='1'><Cell N='Y' V='0.05320140903439774' F='Inh'/></Row><Row T='EllipticalArcTo' IX='2'><Cell N='X' V='0.0555125187913327' F='Inh'/><Cell N='Y' V='0.05320140903439774' F='Inh'/><Cell N='A' V='0.02775625939566635' U='DL' F='Inh'/><Cell N='B' V='0.1064028180687955' U='DL' F='Inh'/><Cell N='D' V='0.5217203810846502' F='Inh'/></Row><Row T='EllipticalArcTo' IX='3'><Cell N='Y' V='0.05320140903439774' F='Inh'/><Cell N='A' V='0.02775625939566635' U='DL' F='Inh'/><Cell N='D' V='0.5217203810846502' F='Inh'/></Row></Section></Shape><Shape ID='221' NameU='Circle.206' IsCustomNameU='1' Name='圆形.206' IsCustomName='1' Type='Shape' Master='10'><Cell N='PinX' V='0.1776724919835518' F='Sheet.318!Width*0.37365012962595'/><Cell N='PinY' V='0.3997737751449542' F='Sheet.318!Height*0.74963443169603'/><Cell N='Width' V='0.0555125187913327' F='Sheet.318!Width*0.11674435142253'/><Cell N='Height' V='0.1064028180687955' F='Sheet.318!Height*0.19952088159094'/><Cell N='LocPinX' V='0.02775625939566635' F='Inh'/><Cell N='LocPinY' V='0.05320140903439774' F='Inh'/><Cell N='TxtPinX' V='0.02775625939566635' F='Inh'/><Cell N='TxtPinY' V='0.05320140903439774' F='Inh'/><Cell N='TxtWidth' V='0.04857345394241611' F='Inh'/><Cell N='TxtHeight' V='0.07980211355159661' F='Inh'/><Cell N='TxtLocPinX' V='0.02428672697120806' F='Inh'/><Cell N='TxtLocPinY' V='0.03990105677579831' F='Inh'/><Cell N='FillForegnd' V='#dbeef3' F='THEMEGUARD(MSOTINT(THEMEVAL("AccentColor4"),80))'/><Cell N='FillBkgnd' V='#e4f2f5' F='THEMEGUARD(SHADE(FillForegnd,LUMDIFF(THEMEVAL("FillColor"),THEMEVAL("FillColor2"))))'/><Cell N='ShapeShdwShow' V='2'/><Cell N='FillGradientEnabled' V='0'/><Section N='Connection'><Row T='Connection' IX='0'><Cell N='X' V='0.02775625939566635' F='Inh'/><Cell N='Y' V='0.1064028180687955' F='Inh'/></Row><Row T='Connection' IX='1'><Cell N='X' V='0.02775625939566635' F='Inh'/><Cell N='Y' V='0.05320140903439774' F='Inh'/></Row><Row T='Connection' IX='2'><Cell N='Y' V='0.05320140903439774' F='Inh'/></Row><Row T='Connection' IX='3'><Cell N='X' V='0.02775625939566635' F='Inh'/></Row><Row T='Connection' IX='4'><Cell N='X' V='0.0555125187913327' F='Inh'/><Cell N='Y' V='0.05320140903439774' F='Inh'/></Row><Row T='Connection' IX='5'><Cell N='X' V='0.008127032751051108' F='Inh'/><Cell N='Y' V='0.01557737256527166' F='Inh'/></Row><Row T='Connection' IX='6'><Cell N='X' V='0.0473854860402816' F='Inh'/><Cell N='Y' V='0.01557737256527166' F='Inh'/></Row><Row T='Connection' IX='7'><Cell N='X' V='0.0473854860402816' F='Inh'/><Cell N='Y' V='0.09082544550352383' F='Inh'/></Row><Row T='Connection' IX='8'><Cell N='X' V='0.008127032751051108' F='Inh'/><Cell N='Y' V='0.09082544550352383' F='Inh'/></Row></Section><Section N='Character'><Row IX='0'><Cell N='Font' V='Times New Roman'/><Cell N='Color' V='#00b0f0' F='THEMEGUARD(RGB(0,176,240))'/><Cell N='ComplexScriptFont' V='Times New Roman'/></Row></Section><Section N='Geometry' IX='0'><Row T='MoveTo' IX='1'><Cell N='Y' V='0.05320140903439774' F='Inh'/></Row><Row T='EllipticalArcTo' IX='2'><Cell N='X' V='0.0555125187913327' F='Inh'/><Cell N='Y' V='0.05320140903439774' F='Inh'/><Cell N='A' V='0.02775625939566635' U='DL' F='Inh'/><Cell N='B' V='0.1064028180687955' U='DL' F='Inh'/><Cell N='D' V='0.5217203810846502' F='Inh'/></Row><Row T='EllipticalArcTo' IX='3'><Cell N='Y' V='0.05320140903439774' F='Inh'/><Cell N='A' V='0.02775625939566635' U='DL' F='Inh'/><Cell N='D' V='0.5217203810846502' F='Inh'/></Row></Section></Shape><Shape ID='222' NameU='Circle.207' IsCustomNameU='1' Name='圆形.207' IsCustomName='1' Type='Shape' Master='10'><Cell N='PinX' V='0.28037335440179' F='Sheet.318!Width*0.58963286351379'/><Cell N='PinY' V='0.3997737751449542' F='Sheet.318!Height*0.74963443169603'/><Cell N='Width' V='0.0555125187913327' F='Sheet.318!Width*0.11674435142253'/><Cell N='Height' V='0.1064028180687955' F='Sheet.318!Height*0.19952088159094'/><Cell N='LocPinX' V='0.02775625939566635' F='Inh'/><Cell N='LocPinY' V='0.05320140903439774' F='Inh'/><Cell N='TxtPinX' V='0.02775625939566635' F='Inh'/><Cell N='TxtPinY' V='0.05320140903439774' F='Inh'/><Cell N='TxtWidth' V='0.04857345394241611' F='Inh'/><Cell N='TxtHeight' V='0.07980211355159661' F='Inh'/><Cell N='TxtLocPinX' V='0.02428672697120806' F='Inh'/><Cell N='TxtLocPinY' V='0.03990105677579831' F='Inh'/><Cell N='FillForegnd' V='#dbeef3' F='THEMEGUARD(MSOTINT(THEMEVAL("AccentColor4"),80))'/><Cell N='FillBkgnd' V='#e4f2f5' F='THEMEGUARD(SHADE(FillForegnd,LUMDIFF(THEMEVAL("FillColor"),THEMEVAL("FillColor2"))))'/><Cell N='ShapeShdwShow' V='2'/><Cell N='FillGradientEnabled' V='0'/><Section N='Connection'><Row T='Connection' IX='0'><Cell N='X' V='0.02775625939566635' F='Inh'/><Cell N='Y' V='0.1064028180687955' F='Inh'/></Row><Row T='Connection' IX='1'><Cell N='X' V='0.02775625939566635' F='Inh'/><Cell N='Y' V='0.05320140903439774' F='Inh'/></Row><Row T='Connection' IX='2'><Cell N='Y' V='0.05320140903439774' F='Inh'/></Row><Row T='Connection' IX='3'><Cell N='X' V='0.02775625939566635' F='Inh'/></Row><Row T='Connection' IX='4'><Cell N='X' V='0.0555125187913327' F='Inh'/><Cell N='Y' V='0.05320140903439774' F='Inh'/></Row><Row T='Connection' IX='5'><Cell N='X' V='0.008127032751051108' F='Inh'/><Cell N='Y' V='0.01557737256527166' F='Inh'/></Row><Row T='Connection' IX='6'><Cell N='X' V='0.0473854860402816' F='Inh'/><Cell N='Y' V='0.01557737256527166' F='Inh'/></Row><Row T='Connection' IX='7'><Cell N='X' V='0.0473854860402816' F='Inh'/><Cell N='Y' V='0.09082544550352383' F='Inh'/></Row><Row T='Connection' IX='8'><Cell N='X' V='0.008127032751051108' F='Inh'/><Cell N='Y' V='0.09082544550352383' F='Inh'/></Row></Section><Section N='Character'><Row IX='0'><Cell N='Font' V='Times New Roman'/><Cell N='Color' V='#00b0f0' F='THEMEGUARD(RGB(0,176,240))'/><Cell N='ComplexScriptFont' V='Times New Roman'/></Row></Section><Section N='Geometry' IX='0'><Row T='MoveTo' IX='1'><Cell N='Y' V='0.05320140903439774' F='Inh'/></Row><Row T='EllipticalArcTo' IX='2'><Cell N='X' V='0.0555125187913327' F='Inh'/><Cell N='Y' V='0.05320140903439774' F='Inh'/><Cell N='A' V='0.02775625939566635' U='DL' F='Inh'/><Cell N='B' V='0.1064028180687955' U='DL' F='Inh'/><Cell N='D' V='0.5217203810846502' F='Inh'/></Row><Row T='EllipticalArcTo' IX='3'><Cell N='Y' V='0.05320140903439774' F='Inh'/><Cell N='A' V='0.02775625939566635' U='DL' F='Inh'/><Cell N='D' V='0.5217203810846502' F='Inh'/></Row></Section></Shape><Shape ID='223' NameU='Circle.208' IsCustomNameU='1' Name='圆形.208' IsCustomName='1' Type='Shape' Master='10'><Cell N='PinX' V='0.3830742168200291' F='Sheet.318!Width*0.80561559740162'/><Cell N='PinY' V='0.3997737751449542' F='Sheet.318!Height*0.74963443169603'/><Cell N='Width' V='0.0555125187913327' F='Sheet.318!Width*0.11674435142253'/><Cell N='Height' V='0.1064028180687955' F='Sheet.318!Height*0.19952088159094'/><Cell N='LocPinX' V='0.02775625939566635' F='Inh'/><Cell N='LocPinY' V='0.05320140903439774' F='Inh'/><Cell N='TxtPinX' V='0.02775625939566635' F='Inh'/><Cell N='TxtPinY' V='0.05320140903439774' F='Inh'/><Cell N='TxtWidth' V='0.04857345394241611' F='Inh'/><Cell N='TxtHeight' V='0.07980211355159661' F='Inh'/><Cell N='TxtLocPinX' V='0.02428672697120806' F='Inh'/><Cell N='TxtLocPinY' V='0.03990105677579831' F='Inh'/><Cell N='FillForegnd' V='#dbeef3' F='THEMEGUARD(MSOTINT(THEMEVAL("AccentColor4"),80))'/><Cell N='FillBkgnd' V='#e4f2f5' F='THEMEGUARD(SHADE(FillForegnd,LUMDIFF(THEMEVAL("FillColor"),THEMEVAL("FillColor2"))))'/><Cell N='ShapeShdwShow' V='2'/><Cell N='FillGradientEnabled' V='0'/><Section N='Connection'><Row T='Connection' IX='0'><Cell N='X' V='0.02775625939566635' F='Inh'/><Cell N='Y' V='0.1064028180687955' F='Inh'/></Row><Row T='Connection' IX='1'><Cell N='X' V='0.02775625939566635' F='Inh'/><Cell N='Y' V='0.05320140903439774' F='Inh'/></Row><Row T='Connection' IX='2'><Cell N='Y' V='0.05320140903439774' F='Inh'/></Row><Row T='Connection' IX='3'><Cell N='X' V='0.02775625939566635' F='Inh'/></Row><Row T='Connection' IX='4'><Cell N='X' V='0.0555125187913327' F='Inh'/><Cell N='Y' V='0.05320140903439774' F='Inh'/></Row><Row T='Connection' IX='5'><Cell N='X' V='0.008127032751051108' F='Inh'/><Cell N='Y' V='0.01557737256527166' F='Inh'/></Row><Row T='Connection' IX='6'><Cell N='X' V='0.0473854860402816' F='Inh'/><Cell N='Y' V='0.01557737256527166' F='Inh'/></Row><Row T='Connection' IX='7'><Cell N='X' V='0.0473854860402816' F='Inh'/><Cell N='Y' V='0.09082544550352383' F='Inh'/></Row><Row T='Connection' IX='8'><Cell N='X' V='0.008127032751051108' F='Inh'/><Cell N='Y' V='0.09082544550352383' F='Inh'/></Row></Section><Section N='Character'><Row IX='0'><Cell N='Font' V='Times New Roman'/><Cell N='Color' V='#00b0f0' F='THEMEGUARD(RGB(0,176,240))'/><Cell N='ComplexScriptFont' V='Times New Roman'/></Row></Section><Section N='Geometry' IX='0'><Row T='MoveTo' IX='1'><Cell N='Y' V='0.05320140903439774' F='Inh'/></Row><Row T='EllipticalArcTo' IX='2'><Cell N='X' V='0.0555125187913327' F='Inh'/><Cell N='Y' V='0.05320140903439774' F='Inh'/><Cell N='A' V='0.02775625939566635' U='DL' F='Inh'/><Cell N='B' V='0.1064028180687955' U='DL' F='Inh'/><Cell N='D' V='0.5217203810846502' F='Inh'/></Row><Row T='EllipticalArcTo' IX='3'><Cell N='Y' V='0.05320140903439774' F='Inh'/><Cell N='A' V='0.02775625939566635' U='DL' F='Inh'/><Cell N='D' V='0.5217203810846502' F='Inh'/></Row></Section></Shape><Shape ID='224' NameU='Circle.209' IsCustomNameU='1' Name='圆形.209' IsCustomName='1' Type='Shape' Master='10'><Cell N='PinX' V='0.3347777849407141' F='Sheet.318!Width*0.70404687491279'/><Cell N='PinY' V='0.2561247904785642' F='Sheet.318!Height*0.48027152777604'/><Cell N='Width' V='0.0555125187913327' F='Sheet.318!Width*0.11674435142253'/><Cell N='Height' V='0.1064028180687955' F='Sheet.318!Height*0.19952088159094'/><Cell N='LocPinX' V='0.02775625939566635' F='Inh'/><Cell N='LocPinY' V='0.05320140903439774' F='Inh'/><Cell N='TxtPinX' V='0.02775625939566635' F='Inh'/><Cell N='TxtPinY' V='0.05320140903439774' F='Inh'/><Cell N='TxtWidth' V='0.04857345394241611' F='Inh'/><Cell N='TxtHeight' V='0.07980211355159661' F='Inh'/><Cell N='TxtLocPinX' V='0.02428672697120806' F='Inh'/><Cell N='TxtLocPinY' V='0.03990105677579831' F='Inh'/><Cell N='FillForegnd' V='#dbeef3' F='THEMEGUARD(MSOTINT(THEMEVAL("AccentColor4"),80))'/><Cell N='FillBkgnd' V='#e4f2f5' F='THEMEGUARD(SHADE(FillForegnd,LUMDIFF(THEMEVAL("FillColor"),THEMEVAL("FillColor2"))))'/><Cell N='ShapeShdwShow' V='2'/><Cell N='FillGradientEnabled' V='0'/><Section N='Connection'><Row T='Connection' IX='0'><Cell N='X' V='0.02775625939566635' F='Inh'/><Cell N='Y' V='0.1064028180687955' F='Inh'/></Row><Row T='Connection' IX='1'><Cell N='X' V='0.02775625939566635' F='Inh'/><Cell N='Y' V='0.05320140903439774' F='Inh'/></Row><Row T='Connection' IX='2'><Cell N='Y' V='0.05320140903439774' F='Inh'/></Row><Row T='Connection' IX='3'><Cell N='X' V='0.02775625939566635' F='Inh'/></Row><Row T='Connection' IX='4'><Cell N='X' V='0.0555125187913327' F='Inh'/><Cell N='Y' V='0.05320140903439774' F='Inh'/></Row><Row T='Connection' IX='5'><Cell N='X' V='0.008127032751051108' F='Inh'/><Cell N='Y' V='0.01557737256527166' F='Inh'/></Row><Row T='Connection' IX='6'><Cell N='X' V='0.0473854860402816' F='Inh'/><Cell N='Y' V='0.01557737256527166' F='Inh'/></Row><Row T='Connection' IX='7'><Cell N='X' V='0.0473854860402816' F='Inh'/><Cell N='Y' V='0.09082544550352383' F='Inh'/></Row><Row T='Connection' IX='8'><Cell N='X' V='0.008127032751051108' F='Inh'/><Cell N='Y' V='0.09082544550352383' F='Inh'/></Row></Section><Section N='Character'><Row IX='0'><Cell N='Font' V='Times New Roman'/><Cell N='Color' V='#00b0f0' F='THEMEGUARD(RGB(0,176,240))'/><Cell N='ComplexScriptFont' V='Times New Roman'/></Row></Section><Section N='Geometry' IX='0'><Row T='MoveTo' IX='1'><Cell N='Y' V='0.05320140903439774' F='Inh'/></Row><Row T='EllipticalArcTo' IX='2'><Cell N='X' V='0.0555125187913327' F='Inh'/><Cell N='Y' V='0.05320140903439774' F='Inh'/><Cell N='A' V='0.02775625939566635' U='DL' F='Inh'/><Cell N='B' V='0.1064028180687955' U='DL' F='Inh'/><Cell N='D' V='0.5217203810846502' F='Inh'/></Row><Row T='EllipticalArcTo' IX='3'><Cell N='Y' V='0.05320140903439774' F='Inh'/><Cell N='A' V='0.02775625939566635' U='DL' F='Inh'/><Cell N='D' V='0.5217203810846502' F='Inh'/></Row></Section></Shape><Shape ID='225' NameU='Circle.210' IsCustomNameU='1' Name='圆形.210' IsCustomName='1' Type='Shape' Master='10'><Cell N='PinX' V='0.2310769404410355' F='Sheet.318!Width*0.48596115124763'/><Cell N='PinY' V='0.2561247904785642' F='Sheet.318!Height*0.48027152777604'/><Cell N='Width' V='0.0555125187913327' F='Sheet.318!Width*0.11674435142253'/><Cell N='Height' V='0.1064028180687955' F='Sheet.318!Height*0.19952088159094'/><Cell N='LocPinX' V='0.02775625939566635' F='Inh'/><Cell N='LocPinY' V='0.05320140903439774' F='Inh'/><Cell N='TxtPinX' V='0.02775625939566635' F='Inh'/><Cell N='TxtPinY' V='0.05320140903439774' F='Inh'/><Cell N='TxtWidth' V='0.04857345394241611' F='Inh'/><Cell N='TxtHeight' V='0.07980211355159661' F='Inh'/><Cell N='TxtLocPinX' V='0.02428672697120806' F='Inh'/><Cell N='TxtLocPinY' V='0.03990105677579831' F='Inh'/><Cell N='FillForegnd' V='#dbeef3' F='THEMEGUARD(MSOTINT(THEMEVAL("AccentColor4"),80))'/><Cell N='FillBkgnd' V='#e4f2f5' F='THEMEGUARD(SHADE(FillForegnd,LUMDIFF(THEMEVAL("FillColor"),THEMEVAL("FillColor2"))))'/><Cell N='ShapeShdwShow' V='2'/><Cell N='FillGradientEnabled' V='0'/><Section N='Connection'><Row T='Connection' IX='0'><Cell N='X' V='0.02775625939566635' F='Inh'/><Cell N='Y' V='0.1064028180687955' F='Inh'/></Row><Row T='Connection' IX='1'><Cell N='X' V='0.02775625939566635' F='Inh'/><Cell N='Y' V='0.05320140903439774' F='Inh'/></Row><Row T='Connection' IX='2'><Cell N='Y' V='0.05320140903439774' F='Inh'/></Row><Row T='Connection' IX='3'><Cell N='X' V='0.02775625939566635' F='Inh'/></Row><Row T='Connection' IX='4'><Cell N='X' V='0.0555125187913327' F='Inh'/><Cell N='Y' V='0.05320140903439774' F='Inh'/></Row><Row T='Connection' IX='5'><Cell N='X' V='0.008127032751051108' F='Inh'/><Cell N='Y' V='0.01557737256527166' F='Inh'/></Row><Row T='Connection' IX='6'><Cell N='X' V='0.0473854860402816' F='Inh'/><Cell N='Y' V='0.01557737256527166' F='Inh'/></Row><Row T='Connection' IX='7'><Cell N='X' V='0.0473854860402816' F='Inh'/><Cell N='Y' V='0.09082544550352383' F='Inh'/></Row><Row T='Connection' IX='8'><Cell N='X' V='0.008127032751051108' F='Inh'/><Cell N='Y' V='0.09082544550352383' F='Inh'/></Row></Section><Section N='Character'><Row IX='0'><Cell N='Font' V='Times New Roman'/><Cell N='Color' V='#00b0f0' F='THEMEGUARD(RGB(0,176,240))'/><Cell N='ComplexScriptFont' V='Times New Roman'/></Row></Section><Section N='Geometry' IX='0'><Row T='MoveTo' IX='1'><Cell N='Y' V='0.05320140903439774' F='Inh'/></Row><Row T='EllipticalArcTo' IX='2'><Cell N='X' V='0.0555125187913327' F='Inh'/><Cell N='Y' V='0.05320140903439774' F='Inh'/><Cell N='A' V='0.02775625939566635' U='DL' F='Inh'/><Cell N='B' V='0.1064028180687955' U='DL' F='Inh'/><Cell N='D' V='0.5217203810846502' F='Inh'/></Row><Row T='EllipticalArcTo' IX='3'><Cell N='Y' V='0.05320140903439774' F='Inh'/><Cell N='A' V='0.02775625939566635' U='DL' F='Inh'/><Cell N='D' V='0.5217203810846502' F='Inh'/></Row></Section></Shape><Shape ID='226' NameU='Circle.211' IsCustomNameU='1' Name='圆形.211' IsCustomName='1' Type='Shape' Master='10'><Cell N='PinX' V='0.1160519745326091' F='Sheet.318!Width*0.24406048929325'/><Cell N='PinY' V='0.2561247904785642' F='Sheet.318!Height*0.48027152777604'/><Cell N='Width' V='0.0555125187913327' F='Sheet.318!Width*0.11674435142253'/><Cell N='Height' V='0.1064028180687955' F='Sheet.318!Height*0.19952088159094'/><Cell N='LocPinX' V='0.02775625939566635' F='Inh'/><Cell N='LocPinY' V='0.05320140903439774' F='Inh'/><Cell N='TxtPinX' V='0.02775625939566635' F='Inh'/><Cell N='TxtPinY' V='0.05320140903439774' F='Inh'/><Cell N='TxtWidth' V='0.04857345394241611' F='Inh'/><Cell N='TxtHeight' V='0.07980211355159661' F='Inh'/><Cell N='TxtLocPinX' V='0.02428672697120806' F='Inh'/><Cell N='TxtLocPinY' V='0.03990105677579831' F='Inh'/><Cell N='FillForegnd' V='#dbeef3' F='THEMEGUARD(MSOTINT(THEMEVAL("AccentColor4"),80))'/><Cell N='FillBkgnd' V='#e4f2f5' F='THEMEGUARD(SHADE(FillForegnd,LUMDIFF(THEMEVAL("FillColor"),THEMEVAL("FillColor2"))))'/><Cell N='ShapeShdwShow' V='2'/><Cell N='FillGradientEnabled' V='0'/><Section N='Connection'><Row T='Connection' IX='0'><Cell N='X' V='0.02775625939566635' F='Inh'/><Cell N='Y' V='0.1064028180687955' F='Inh'/></Row><Row T='Connection' IX='1'><Cell N='X' V='0.02775625939566635' F='Inh'/><Cell N='Y' V='0.05320140903439774' F='Inh'/></Row><Row T='Connection' IX='2'><Cell N='Y' V='0.05320140903439774' F='Inh'/></Row><Row T='Connection' IX='3'><Cell N='X' V='0.02775625939566635' F='Inh'/></Row><Row T='Connection' IX='4'><Cell N='X' V='0.0555125187913327' F='Inh'/><Cell N='Y' V='0.05320140903439774' F='Inh'/></Row><Row T='Connection' IX='5'><Cell N='X' V='0.008127032751051108' F='Inh'/><Cell N='Y' V='0.01557737256527166' F='Inh'/></Row><Row T='Connection' IX='6'><Cell N='X' V='0.0473854860402816' F='Inh'/><Cell N='Y' V='0.01557737256527166' F='Inh'/></Row><Row T='Connection' IX='7'><Cell N='X' V='0.0473854860402816' F='Inh'/><Cell N='Y' V='0.09082544550352383' F='Inh'/></Row><Row T='Connection' IX='8'><Cell N='X' V='0.008127032751051108' F='Inh'/><Cell N='Y' V='0.09082544550352383' F='Inh'/></Row></Section><Section N='Character'><Row IX='0'><Cell N='Font' V='Times New Roman'/><Cell N='Color' V='#00b0f0' F='THEMEGUARD(RGB(0,176,240))'/><Cell N='ComplexScriptFont' V='Times New Roman'/></Row></Section><Section N='Geometry' IX='0'><Row T='MoveTo' IX='1'><Cell N='Y' V='0.05320140903439774' F='Inh'/></Row><Row T='EllipticalArcTo' IX='2'><Cell N='X' V='0.0555125187913327' F='Inh'/><Cell N='Y' V='0.05320140903439774' F='Inh'/><Cell N='A' V='0.02775625939566635' U='DL' F='Inh'/><Cell N='B' V='0.1064028180687955' U='DL' F='Inh'/><Cell N='D' V='0.5217203810846502' F='Inh'/></Row><Row T='EllipticalArcTo' IX='3'><Cell N='Y' V='0.05320140903439774' F='Inh'/><Cell N='A' V='0.02775625939566635' U='DL' F='Inh'/><Cell N='D' V='0.5217203810846502' F='Inh'/></Row></Section></Shape><Shape ID='227' NameU='Circle.212' IsCustomNameU='1' Name='圆形.212' IsCustomName='1' Type='Shape' Master='10'><Cell N='PinX' V='0.07397164748387383' F='Sheet.318!Width*0.15556440596079'/><Cell N='PinY' V='0.1084351924677947' F='Sheet.318!Height*0.20333188151717'/><Cell N='Width' V='0.0555125187913327' F='Sheet.318!Width*0.11674435142253'/><Cell N='Height' V='0.1064028180687955' F='Sheet.318!Height*0.19952088159094'/><Cell N='LocPinX' V='0.02775625939566635' F='Inh'/><Cell N='LocPinY' V='0.05320140903439774' F='Inh'/><Cell N='TxtPinX' V='0.02775625939566635' F='Inh'/><Cell N='TxtPinY' V='0.05320140903439774' F='Inh'/><Cell N='TxtWidth' V='0.04857345394241611' F='Inh'/><Cell N='TxtHeight' V='0.07980211355159661' F='Inh'/><Cell N='TxtLocPinX' V='0.02428672697120806' F='Inh'/><Cell N='TxtLocPinY' V='0.03990105677579831' F='Inh'/><Cell N='FillForegnd' V='#dbeef3' F='THEMEGUARD(MSOTINT(THEMEVAL("AccentColor4"),80))'/><Cell N='FillBkgnd' V='#e4f2f5' F='THEMEGUARD(SHADE(FillForegnd,LUMDIFF(THEMEVAL("FillColor"),THEMEVAL("FillColor2"))))'/><Cell N='ShapeShdwShow' V='2'/><Cell N='FillGradientEnabled' V='0'/><Section N='Connection'><Row T='Connection' IX='0'><Cell N='X' V='0.02775625939566635' F='Inh'/><Cell N='Y' V='0.1064028180687955' F='Inh'/></Row><Row T='Connection' IX='1'><Cell N='X' V='0.02775625939566635' F='Inh'/><Cell N='Y' V='0.05320140903439774' F='Inh'/></Row><Row T='Connection' IX='2'><Cell N='Y' V='0.05320140903439774' F='Inh'/></Row><Row T='Connection' IX='3'><Cell N='X' V='0.02775625939566635' F='Inh'/></Row><Row T='Connection' IX='4'><Cell N='X' V='0.0555125187913327' F='Inh'/><Cell N='Y' V='0.05320140903439774' F='Inh'/></Row><Row T='Connection' IX='5'><Cell N='X' V='0.008127032751051108' F='Inh'/><Cell N='Y' V='0.01557737256527166' F='Inh'/></Row><Row T='Connection' IX='6'><Cell N='X' V='0.0473854860402816' F='Inh'/><Cell N='Y' V='0.01557737256527166' F='Inh'/></Row><Row T='Connection' IX='7'><Cell N='X' V='0.0473854860402816' F='Inh'/><Cell N='Y' V='0.09082544550352383' F='Inh'/></Row><Row T='Connection' IX='8'><Cell N='X' V='0.008127032751051108' F='Inh'/><Cell N='Y' V='0.09082544550352383' F='Inh'/></Row></Section><Section N='Character'><Row IX='0'><Cell N='Font' V='Times New Roman'/><Cell N='Color' V='#00b0f0' F='THEMEGUARD(RGB(0,176,240))'/><Cell N='ComplexScriptFont' V='Times New Roman'/></Row></Section><Section N='Geometry' IX='0'><Row T='MoveTo' IX='1'><Cell N='Y' V='0.05320140903439774' F='Inh'/></Row><Row T='EllipticalArcTo' IX='2'><Cell N='X' V='0.0555125187913327' F='Inh'/><Cell N='Y' V='0.05320140903439774' F='Inh'/><Cell N='A' V='0.02775625939566635' U='DL' F='Inh'/><Cell N='B' V='0.1064028180687955' U='DL' F='Inh'/><Cell N='D' V='0.5217203810846502' F='Inh'/></Row><Row T='EllipticalArcTo' IX='3'><Cell N='Y' V='0.05320140903439774' F='Inh'/><Cell N='A' V='0.02775625939566635' U='DL' F='Inh'/><Cell N='D' V='0.5217203810846502' F='Inh'/></Row></Section></Shape><Shape ID='228' NameU='Circle.213' IsCustomNameU='1' Name='圆形.213' IsCustomName='1' Type='Shape' Master='10'><Cell N='PinX' V='0.1766725099021119' F='Sheet.318!Width*0.37154713984863'/><Cell N='PinY' V='0.1084351924677947' F='Sheet.318!Height*0.20333188151717'/><Cell N='Width' V='0.0555125187913327' F='Sheet.318!Width*0.11674435142253'/><Cell N='Height' V='0.1064028180687955' F='Sheet.318!Height*0.19952088159094'/><Cell N='LocPinX' V='0.02775625939566635' F='Inh'/><Cell N='LocPinY' V='0.05320140903439774' F='Inh'/><Cell N='TxtPinX' V='0.02775625939566635' F='Inh'/><Cell N='TxtPinY' V='0.05320140903439774' F='Inh'/><Cell N='TxtWidth' V='0.04857345394241611' F='Inh'/><Cell N='TxtHeight' V='0.07980211355159661' F='Inh'/><Cell N='TxtLocPinX' V='0.02428672697120806' F='Inh'/><Cell N='TxtLocPinY' V='0.03990105677579831' F='Inh'/><Cell N='FillForegnd' V='#dbeef3' F='THEMEGUARD(MSOTINT(THEMEVAL("AccentColor4"),80))'/><Cell N='FillBkgnd' V='#e4f2f5' F='THEMEGUARD(SHADE(FillForegnd,LUMDIFF(THEMEVAL("FillColor"),THEMEVAL("FillColor2"))))'/><Cell N='ShapeShdwShow' V='2'/><Cell N='FillGradientEnabled' V='0'/><Section N='Connection'><Row T='Connection' IX='0'><Cell N='X' V='0.02775625939566635' F='Inh'/><Cell N='Y' V='0.1064028180687955' F='Inh'/></Row><Row T='Connection' IX='1'><Cell N='X' V='0.02775625939566635' F='Inh'/><Cell N='Y' V='0.05320140903439774' F='Inh'/></Row><Row T='Connection' IX='2'><Cell N='Y' V='0.05320140903439774' F='Inh'/></Row><Row T='Connection' IX='3'><Cell N='X' V='0.02775625939566635' F='Inh'/></Row><Row T='Connection' IX='4'><Cell N='X' V='0.0555125187913327' F='Inh'/><Cell N='Y' V='0.05320140903439774' F='Inh'/></Row><Row T='Connection' IX='5'><Cell N='X' V='0.008127032751051108' F='Inh'/><Cell N='Y' V='0.01557737256527166' F='Inh'/></Row><Row T='Connection' IX='6'><Cell N='X' V='0.0473854860402816' F='Inh'/><Cell N='Y' V='0.01557737256527166' F='Inh'/></Row><Row T='Connection' IX='7'><Cell N='X' V='0.0473854860402816' F='Inh'/><Cell N='Y' V='0.09082544550352383' F='Inh'/></Row><Row T='Connection' IX='8'><Cell N='X' V='0.008127032751051108' F='Inh'/><Cell N='Y' V='0.09082544550352383' F='Inh'/></Row></Section><Section N='Character'><Row IX='0'><Cell N='Font' V='Times New Roman'/><Cell N='Color' V='#00b0f0' F='THEMEGUARD(RGB(0,176,240))'/><Cell N='ComplexScriptFont' V='Times New Roman'/></Row></Section><Section N='Geometry' IX='0'><Row T='MoveTo' IX='1'><Cell N='Y' V='0.05320140903439774' F='Inh'/></Row><Row T='EllipticalArcTo' IX='2'><Cell N='X' V='0.0555125187913327' F='Inh'/><Cell N='Y' V='0.05320140903439774' F='Inh'/><Cell N='A' V='0.02775625939566635' U='DL' F='Inh'/><Cell N='B' V='0.1064028180687955' U='DL' F='Inh'/><Cell N='D' V='0.5217203810846502' F='Inh'/></Row><Row T='EllipticalArcTo' IX='3'><Cell N='Y' V='0.05320140903439774' F='Inh'/><Cell N='A' V='0.02775625939566635' U='DL' F='Inh'/><Cell N='D' V='0.5217203810846502' F='Inh'/></Row></Section></Shape><Shape ID='229' NameU='Circle.214' IsCustomNameU='1' Name='圆形.214' IsCustomName='1' Type='Shape' Master='10'><Cell N='PinX' V='0.27937337232035' F='Sheet.318!Width*0.58752987373646'/><Cell N='PinY' V='0.1084351924677947' F='Sheet.318!Height*0.20333188151717'/><Cell N='Width' V='0.0555125187913327' F='Sheet.318!Width*0.11674435142253'/><Cell N='Height' V='0.1064028180687955' F='Sheet.318!Height*0.19952088159094'/><Cell N='LocPinX' V='0.02775625939566635' F='Inh'/><Cell N='LocPinY' V='0.05320140903439774' F='Inh'/><Cell N='TxtPinX' V='0.02775625939566635' F='Inh'/><Cell N='TxtPinY' V='0.05320140903439774' F='Inh'/><Cell N='TxtWidth' V='0.04857345394241611' F='Inh'/><Cell N='TxtHeight' V='0.07980211355159661' F='Inh'/><Cell N='TxtLocPinX' V='0.02428672697120806' F='Inh'/><Cell N='TxtLocPinY' V='0.03990105677579831' F='Inh'/><Cell N='FillForegnd' V='#dbeef3' F='THEMEGUARD(MSOTINT(THEMEVAL("AccentColor4"),80))'/><Cell N='FillBkgnd' V='#e4f2f5' F='THEMEGUARD(SHADE(FillForegnd,LUMDIFF(THEMEVAL("FillColor"),THEMEVAL("FillColor2"))))'/><Cell N='ShapeShdwShow' V='2'/><Cell N='FillGradientEnabled' V='0'/><Section N='Connection'><Row T='Connection' IX='0'><Cell N='X' V='0.02775625939566635' F='Inh'/><Cell N='Y' V='0.1064028180687955' F='Inh'/></Row><Row T='Connection' IX='1'><Cell N='X' V='0.02775625939566635' F='Inh'/><Cell N='Y' V='0.05320140903439774' F='Inh'/></Row><Row T='Connection' IX='2'><Cell N='Y' V='0.05320140903439774' F='Inh'/></Row><Row T='Connection' IX='3'><Cell N='X' V='0.02775625939566635' F='Inh'/></Row><Row T='Connection' IX='4'><Cell N='X' V='0.0555125187913327' F='Inh'/><Cell N='Y' V='0.05320140903439774' F='Inh'/></Row><Row T='Connection' IX='5'><Cell N='X' V='0.008127032751051108' F='Inh'/><Cell N='Y' V='0.01557737256527166' F='Inh'/></Row><Row T='Connection' IX='6'><Cell N='X' V='0.0473854860402816' F='Inh'/><Cell N='Y' V='0.01557737256527166' F='Inh'/></Row><Row T='Connection' IX='7'><Cell N='X' V='0.0473854860402816' F='Inh'/><Cell N='Y' V='0.09082544550352383' F='Inh'/></Row><Row T='Connection' IX='8'><Cell N='X' V='0.008127032751051108' F='Inh'/><Cell N='Y' V='0.09082544550352383' F='Inh'/></Row></Section><Section N='Character'><Row IX='0'><Cell N='Font' V='Times New Roman'/><Cell N='Color' V='#00b0f0' F='THEMEGUARD(RGB(0,176,240))'/><Cell N='ComplexScriptFont' V='Times New Roman'/></Row></Section><Section N='Geometry' IX='0'><Row T='MoveTo' IX='1'><Cell N='Y' V='0.05320140903439774' F='Inh'/></Row><Row T='EllipticalArcTo' IX='2'><Cell N='X' V='0.0555125187913327' F='Inh'/><Cell N='Y' V='0.05320140903439774' F='Inh'/><Cell N='A' V='0.02775625939566635' U='DL' F='Inh'/><Cell N='B' V='0.1064028180687955' U='DL' F='Inh'/><Cell N='D' V='0.5217203810846502' F='Inh'/></Row><Row T='EllipticalArcTo' IX='3'><Cell N='Y' V='0.05320140903439774' F='Inh'/><Cell N='A' V='0.02775625939566635' U='DL' F='Inh'/><Cell N='D' V='0.5217203810846502' F='Inh'/></Row></Section></Shape><Shape ID='230' NameU='Circle.215' IsCustomNameU='1' Name='圆形.215' IsCustomName='1' Type='Shape' Master='10'><Cell N='PinX' V='0.382074234738588' F='Sheet.318!Width*0.80351260762429'/><Cell N='PinY' V='0.1084351924677947' F='Sheet.318!Height*0.20333188151717'/><Cell N='Width' V='0.0555125187913327' F='Sheet.318!Width*0.11674435142253'/><Cell N='Height' V='0.1064028180687955' F='Sheet.318!Height*0.19952088159094'/><Cell N='LocPinX' V='0.02775625939566635' F='Inh'/><Cell N='LocPinY' V='0.05320140903439774' F='Inh'/><Cell N='TxtPinX' V='0.02775625939566635' F='Inh'/><Cell N='TxtPinY' V='0.05320140903439774' F='Inh'/><Cell N='TxtWidth' V='0.04857345394241611' F='Inh'/><Cell N='TxtHeight' V='0.07980211355159661' F='Inh'/><Cell N='TxtLocPinX' V='0.02428672697120806' F='Inh'/><Cell N='TxtLocPinY' V='0.03990105677579831' F='Inh'/><Cell N='FillForegnd' V='#dbeef3' F='THEMEGUARD(MSOTINT(THEMEVAL("AccentColor4"),80))'/><Cell N='FillBkgnd' V='#e4f2f5' F='THEMEGUARD(SHADE(FillForegnd,LUMDIFF(THEMEVAL("FillColor"),THEMEVAL("FillColor2"))))'/><Cell N='ShapeShdwShow' V='2'/><Cell N='FillGradientEnabled' V='0'/><Section N='Connection'><Row T='Connection' IX='0'><Cell N='X' V='0.02775625939566635' F='Inh'/><Cell N='Y' V='0.1064028180687955' F='Inh'/></Row><Row T='Connection' IX='1'><Cell N='X' V='0.02775625939566635' F='Inh'/><Cell N='Y' V='0.05320140903439774' F='Inh'/></Row><Row T='Connection' IX='2'><Cell N='Y' V='0.05320140903439774' F='Inh'/></Row><Row T='Connection' IX='3'><Cell N='X' V='0.02775625939566635' F='Inh'/></Row><Row T='Connection' IX='4'><Cell N='X' V='0.0555125187913327' F='Inh'/><Cell N='Y' V='0.05320140903439774' F='Inh'/></Row><Row T='Connection' IX='5'><Cell N='X' V='0.008127032751051108' F='Inh'/><Cell N='Y' V='0.01557737256527166' F='Inh'/></Row><Row T='Connection' IX='6'><Cell N='X' V='0.0473854860402816' F='Inh'/><Cell N='Y' V='0.01557737256527166' F='Inh'/></Row><Row T='Connection' IX='7'><Cell N='X' V='0.0473854860402816' F='Inh'/><Cell N='Y' V='0.09082544550352383' F='Inh'/></Row><Row T='Connection' IX='8'><Cell N='X' V='0.008127032751051108' F='Inh'/><Cell N='Y' V='0.09082544550352383' F='Inh'/></Row></Section><Section N='Character'><Row IX='0'><Cell N='Font' V='Times New Roman'/><Cell N='Color' V='#00b0f0' F='THEMEGUARD(RGB(0,176,240))'/><Cell N='ComplexScriptFont' V='Times New Roman'/></Row></Section><Section N='Geometry' IX='0'><Row T='MoveTo' IX='1'><Cell N='Y' V='0.05320140903439774' F='Inh'/></Row><Row T='EllipticalArcTo' IX='2'><Cell N='X' V='0.0555125187913327' F='Inh'/><Cell N='Y' V='0.05320140903439774' F='Inh'/><Cell N='A' V='0.02775625939566635' U='DL' F='Inh'/><Cell N='B' V='0.1064028180687955' U='DL' F='Inh'/><Cell N='D' V='0.5217203810846502' F='Inh'/></Row><Row T='EllipticalArcTo' IX='3'><Cell N='Y' V='0.05320140903439774' F='Inh'/><Cell N='A' V='0.02775625939566635' U='DL' F='Inh'/><Cell N='D' V='0.5217203810846502' F='Inh'/></Row></Section></Shape></Shapes></Shape><Shape ID='332' NameU='Rectangle' Name='矩形' Type='Shape' Master='4'><Cell N='PinX' V='2.078357089601881'/><Cell N='PinY' V='5.744418340275514'/><Cell N='Width' V='1.137467134268362'/><Cell N='Height' V='0.205873417167252'/><Cell N='LocPinX' V='0.5687335671341809' F='Inh'/><Cell N='LocPinY' V='0.102936708583626' F='Inh'/><Cell N='ObjType' V='1'/><Cell N='FillPattern' V='0' F='THEMEGUARD(0)'/><Cell N='ShdwPattern' V='0' F='THEMEGUARD(0)'/><Cell N='LineGradientDir' V='0'/><Cell N='LineGradientAngle' V='1.5707963267949' U='DEG'/><Cell N='LineGradientEnabled' V='0'/><Cell N='FillGradientEnabled' V='0' F='THEMEGUARD(FALSE)'/><Cell N='LineWeight' V='Themed' F='THEMEVAL()'/><Cell N='LineColor' V='#c05046' F='THEMEGUARD(THEMEVAL("AccentColor"))'/><Cell N='LinePattern' V='1'/><Cell N='LeftMargin' V='0.02777777777777778' U='PT'/><Cell N='RightMargin' V='0.02777777777777778' U='PT'/><Cell N='TopMargin' V='0.02777777777777778' U='PT'/><Cell N='BottomMargin' V='0.02777777777777778' U='PT'/><Cell N='SketchEnabled' V='0'/><Section N='Connection'><Row T='Connection' IX='0'><Cell N='X' V='0.5687335671341809' F='Inh'/></Row><Row T='Connection' IX='1'><Cell N='X' V='1.137467134268362' F='Inh'/><Cell N='Y' V='0.102936708583626' F='Inh'/></Row><Row T='Connection' IX='2'><Cell N='X' V='0.5687335671341809' F='Inh'/><Cell N='Y' V='0.205873417167252' F='Inh'/></Row><Row T='Connection' IX='3'><Cell N='Y' V='0.102936708583626' F='Inh'/></Row><Row T='Connection' IX='4'><Cell N='X' V='0.5687335671341809' F='Inh'/><Cell N='Y' V='0.102936708583626' F='Inh'/></Row></Section><Section N='Character'><Row IX='0'><Cell N='Font' V='Times New Roman'/><Cell N='Color' V='0'/><Cell N='Style' V='0'/><Cell N='Size' V='0.1666666666666667' U='PT'/><Cell N='AsianFont' V='SimSun'/><Cell N='ComplexScriptFont' V='Times New Roman'/></Row></Section><Section N='LineGradient'><Row IX='0'><Cell N='GradientStopColor' V='#fbf6f5' F='THEMEGUARD(MSOTINT(THEMEVAL("AccentColor"),95))'/><Cell N='GradientStopColorTrans' V='0'/><Cell N='GradientStopPosition' V='0'/></Row><Row IX='1'><Cell N='GradientStopColor' V='#e2b0ab' F='THEMEGUARD(MSOTINT(THEMEVAL("AccentColor"),55))'/><Cell N='GradientStopColorTrans' V='0'/><Cell N='GradientStopPosition' V='0.74'/></Row><Row IX='2'><Cell N='GradientStopColor' V='#e2b0ab' F='THEMEGUARD(MSOTINT(THEMEVAL("AccentColor"),55))'/><Cell N='GradientStopColorTrans' V='0'/><Cell N='GradientStopPosition' V='0.83'/></Row><Row IX='3'><Cell N='GradientStopColor' V='#eccac7' F='THEMEGUARD(MSOTINT(THEMEVAL("AccentColor"),70))'/><Cell N='GradientStopColorTrans' V='0'/><Cell N='GradientStopPosition' V='1'/></Row><Row IX='4' Del='1'/><Row IX='5' Del='1'/><Row IX='6' Del='1'/><Row IX='7' Del='1'/><Row IX='8' Del='1'/><Row IX='9' Del='1'/></Section><Section N='Geometry' IX='0'><Row T='LineTo' IX='2'><Cell N='X' V='1.137467134268362' F='Inh'/></Row><Row T='LineTo' IX='3'><Cell N='X' V='1.137467134268362' F='Inh'/><Cell N='Y' V='0.205873417167252' F='Inh'/></Row><Row T='LineTo' IX='4'><Cell N='Y' V='0.205873417167252' F='Inh'/></Row></Section><Text><cp IX='0'/>ResNet-152
</Text></Shape><Shape ID='333' NameU='Dynamic connector.333' Name='动态连接线.333' Type='Shape' Master='5'><Cell N='PinX' V='2.798391234469015' U='MM' F='Inh'/><Cell N='PinY' V='5.662563784678945' F='Inh'/><Cell N='Width' V='0.3026011554659083' U='MM' F='GUARD(EndX-BeginX)'/><Cell N='Height' V='-0.1968503937007874' F='GUARD(-0.19685039370079DL)'/><Cell N='LocPinX' V='0.1513005777329537' U='MM' F='Inh'/><Cell N='LocPinY' V='-0.09842519685039369' F='Inh'/><Cell N='BeginX' V='2.647090656736062' F='PAR(PNT(Sheet.332!Connections.X2,Sheet.332!Connections.Y2))'/><Cell N='BeginY' V='5.744418340275514' F='PAR(PNT(Sheet.332!Connections.X2,Sheet.332!Connections.Y2))'/><Cell N='EndX' V='2.94969181220197' U='MM' F='PAR(PNT(Sheet.219!Connections.X4,Sheet.219!Connections.Y4))'/><Cell N='EndY' V='5.580709229082375' F='PAR(PNT(Sheet.219!Connections.X4,Sheet.219!Connections.Y4))'/><Cell N='LayerMember' V='0'/><Cell N='BegTrigger' V='2' F='_XFTRIGGER(Sheet.332!EventXFMod)'/><Cell N='EndTrigger' V='2' F='_XFTRIGGER(Sheet.219!EventXFMod)'/><Cell N='TxtPinX' V='0.1513005793094639' F='Inh'/><Cell N='TxtPinY' V='-0.09842519368976371' F='Inh'/><Cell N='ShapeRouteStyle' V='16'/><Cell N='ConLineRouteExt' V='1'/><Section N='Control'><Row N='TextPosition'><Cell N='X' V='0.1513005793094639'/><Cell N='Y' V='-0.09842519368976371'/><Cell N='XDyn' V='0.1513005793094639' F='Inh'/><Cell N='YDyn' V='-0.09842519368976371' F='Inh'/></Row></Section><Section N='Character'><Row IX='0'><Cell N='Font' V='Times New Roman'/><Cell N='ComplexScriptFont' V='Times New Roman'/></Row></Section><Section N='Geometry' IX='0'><Row T='MoveTo' IX='1'><Cell N='Y' V='-0.01657064125382401'/></Row><Row T='LineTo' IX='2'><Cell N='X' V='0.3026011554659065'/><Cell N='Y' V='-0.180279752446963'/></Row><Row T='LineTo' IX='3' Del='1'/></Section></Shape><Shape ID='257' Type='Shape' Master='5'><Cell N='PinX' V='6.134147570438951' U='MM' F='Inh'/><Cell N='PinY' V='5.579513569984835' F='Inh'/><Cell N='Width' V='0.4876108562411474' U='MM' F='GUARD(EndX-BeginX)'/><Cell N='Height' V='0.1968503937007874' F='GUARD(0.19685039370079DL)'/><Cell N='LocPinX' V='0.2438054281205737' U='MM' F='Inh'/><Cell N='LocPinY' V='0.09842519685039369' F='Inh'/><Cell N='BeginX' V='5.890342142318377'/><Cell N='BeginY' V='5.579513569984835'/><Cell N='EndX' V='6.377952998559525' U='MM' F='PAR(PNT(Sheet.253!Connections.X3,Sheet.253!Connections.Y3))'/><Cell N='EndY' V='5.579513569984835' F='PAR(PNT(Sheet.253!Connections.X3,Sheet.253!Connections.Y3))'/><Cell N='LayerMember' V='0'/><Cell N='BegTrigger' V='1' F='_XFTRIGGER(EventXFMod)'/><Cell N='EndTrigger' V='2' F='_XFTRIGGER(Sheet.253!EventXFMod)'/><Cell N='TxtPinX' V='0.2438054233789453' F='Inh'/><Cell N='TxtPinY' V='0.09842519462108756' F='Inh'/><Cell N='ShapeShdwShow' V='2'/><Section N='Control'><Row N='TextPosition'><Cell N='X' V='0.2438054233789453'/><Cell N='Y' V='0.09842519462108756'/><Cell N='XDyn' V='0.2438054233789453' F='Inh'/><Cell N='YDyn' V='0.09842519462108756' F='Inh'/></Row></Section><Section N='Character'><Row IX='0'><Cell N='Font' V='Times New Roman'/><Cell N='ComplexScriptFont' V='Times New Roman'/></Row></Section><Section N='Geometry' IX='0'><Row T='MoveTo' IX='1'><Cell N='Y' V='0.09842519685039353'/></Row><Row T='LineTo' IX='2'><Cell N='X' V='0.4876108562411465'/><Cell N='Y' V='0.09842519685039353'/></Row><Row T='LineTo' IX='3' Del='1'/></Section></Shape><Shape ID='265' NameU='Rectangle.265' Name='矩形.265' Type='Shape' Master='4'><Cell N='PinX' V='4.756943897209125'/><Cell N='PinY' V='5.701772400583815'/><Cell N='Width' V='2.263779527559055'/><Cell N='Height' V='1.127952397154587'/><Cell N='LocPinX' V='1.131889763779527' F='Inh'/><Cell N='LocPinY' V='0.5639761985772935' F='Inh'/><Cell N='ObjType' V='1'/><Cell N='LinePattern' V='16'/><Cell N='ShapeShdwShow' V='2'/><Section N='Connection'><Row T='Connection' IX='0'><Cell N='X' V='1.131889763779527' F='Inh'/></Row><Row T='Connection' IX='1'><Cell N='X' V='2.263779527559055' F='Inh'/><Cell N='Y' V='0.5639761985772935' F='Inh'/></Row><Row T='Connection' IX='2'><Cell N='X' V='1.131889763779527' F='Inh'/><Cell N='Y' V='1.127952397154587' F='Inh'/></Row><Row T='Connection' IX='3'><Cell N='Y' V='0.5639761985772935' F='Inh'/></Row><Row T='Connection' IX='4'><Cell N='X' V='1.131889763779527' F='Inh'/><Cell N='Y' V='0.5639761985772935' F='Inh'/></Row></Section><Section N='Character'><Row IX='0'><Cell N='Font' V='Times New Roman'/><Cell N='ComplexScriptFont' V='Times New Roman'/></Row></Section><Section N='Geometry' IX='0'><Row T='LineTo' IX='2'><Cell N='X' V='2.263779527559055' F='Inh'/></Row><Row T='LineTo' IX='3'><Cell N='X' V='2.263779527559055' F='Inh'/><Cell N='Y' V='1.127952397154587' F='Inh'/></Row><Row T='LineTo' IX='4'><Cell N='Y' V='1.127952397154587' F='Inh'/></Row></Section></Shape><Shape ID='269' NameU='Rectangle.269' Name='矩形.269' Type='Shape' Master='4'><Cell N='PinX' V='4.153597466902046'/><Cell N='PinY' V='5.580709229082364'/><Cell N='Width' V='0.9114172700629738'/><Cell N='Height' V='0.5332916395535285'/><Cell N='LocPinX' V='0.4557086350314869' F='Inh'/><Cell N='LocPinY' V='0.2666458197767643' F='Inh'/><Cell N='ObjType' V='1'/><Cell N='SketchEnabled' V='0'/><Cell N='FillForegnd' V='#92cddc' F='THEMEGUARD(MSOTINT(THEMEVAL("AccentColor4"),40))'/><Cell N='FillBkgnd' V='#b0dbe6' F='THEMEGUARD(SHADE(FillForegnd,LUMDIFF(THEMEVAL("FillColor"),THEMEVAL("FillColor2"))))'/><Cell N='ShapeShdwShow' V='2'/><Cell N='FillGradientEnabled' V='0'/><Section N='Connection'><Row T='Connection' IX='0'><Cell N='X' V='0.4557086350314869' F='Inh'/></Row><Row T='Connection' IX='1'><Cell N='X' V='0.9114172700629738' F='Inh'/><Cell N='Y' V='0.2666458197767643' F='Inh'/></Row><Row T='Connection' IX='2'><Cell N='X' V='0.4557086350314869' F='Inh'/><Cell N='Y' V='0.5332916395535285' F='Inh'/></Row><Row T='Connection' IX='3'><Cell N='Y' V='0.2666458197767643' F='Inh'/></Row><Row T='Connection' IX='4'><Cell N='X' V='0.4557086350314869' F='Inh'/><Cell N='Y' V='0.2666458197767643' F='Inh'/></Row></Section><Section N='Character'><Row IX='0'><Cell N='Font' V='Times New Roman'/><Cell N='Color' V='0'/><Cell N='Style' V='0'/><Cell N='Size' V='0.1666666666666667' U='PT'/><Cell N='AsianFont' V='SimSun'/><Cell N='ComplexScriptFont' V='Times New Roman'/></Row></Section><Section N='Geometry' IX='0'><Row T='LineTo' IX='2'><Cell N='X' V='0.9114172700629738' F='Inh'/></Row><Row T='LineTo' IX='3'><Cell N='X' V='0.9114172700629738' F='Inh'/><Cell N='Y' V='0.5332916395535285' F='Inh'/></Row><Row T='LineTo' IX='4'><Cell N='Y' V='0.5332916395535285' F='Inh'/></Row></Section><Text><cp IX='0'/>transformer encode
</Text></Shape><Shape ID='270' NameU='Rectangle.270' Name='矩形.270' Type='Shape' Master='4'><Cell N='PinX' V='5.089456959165127'/><Cell N='PinY' V='5.581607017363064'/><Cell N='Width' V='0.6453410845419292'/><Cell N='Height' V='0.5332916395535268'/><Cell N='LocPinX' V='0.3226705422709646' F='Inh'/><Cell N='LocPinY' V='0.2666458197767634' F='Inh'/><Cell N='ObjType' V='1'/><Cell N='SketchEnabled' V='0'/><Cell N='FillForegnd' V='#f9c499' F='THEMEGUARD(MSOTINT(THEMEVAL("AccentColor5"),40))'/><Cell N='FillBkgnd' V='#fbd5b5' F='THEMEGUARD(SHADE(FillForegnd,LUMDIFF(THEMEVAL("FillColor"),THEMEVAL("FillColor2"))))'/><Cell N='ShapeShdwShow' V='2'/><Cell N='FillGradientEnabled' V='0'/><Section N='Connection'><Row T='Connection' IX='0'><Cell N='X' V='0.3226705422709646' F='Inh'/></Row><Row T='Connection' IX='1'><Cell N='X' V='0.6453410845419292' F='Inh'/><Cell N='Y' V='0.2666458197767634' F='Inh'/></Row><Row T='Connection' IX='2'><Cell N='X' V='0.3226705422709646' F='Inh'/><Cell N='Y' V='0.5332916395535268' F='Inh'/></Row><Row T='Connection' IX='3'><Cell N='Y' V='0.2666458197767634' F='Inh'/></Row><Row T='Connection' IX='4'><Cell N='X' V='0.3226705422709646' F='Inh'/><Cell N='Y' V='0.2666458197767634' F='Inh'/></Row></Section><Section N='Character'><Row IX='0'><Cell N='Font' V='Times New Roman'/><Cell N='Color' V='0'/><Cell N='Style' V='0'/><Cell N='Size' V='0.1666666666666667' U='PT'/><Cell N='AsianFont' V='SimSun'/><Cell N='ComplexScriptFont' V='Times New Roman'/></Row></Section><Section N='Geometry' IX='0'><Row T='LineTo' IX='2'><Cell N='X' V='0.6453410845419292' F='Inh'/></Row><Row T='LineTo' IX='3'><Cell N='X' V='0.6453410845419292' F='Inh'/><Cell N='Y' V='0.5332916395535268' F='Inh'/></Row><Row T='LineTo' IX='4'><Cell N='Y' V='0.5332916395535268' F='Inh'/></Row></Section><Text><cp IX='0'/>LSTM decoder
</Text></Shape><Shape ID='271' NameU='Dynamic connector.271' Name='动态连接线.271' Type='Shape' Master='5'><Cell N='PinX' V='4.688046259413847' U='MM' F='Inh'/><Cell N='PinY' V='5.581158123222714' F='Inh'/><Cell N='Width' V='0.1968503937007874' F='GUARD(0.19685039370079DL)'/><Cell N='Height' V='0.1968503937007874' F='GUARD(0.19685039370079DL)'/><Cell N='LocPinX' V='0.09842519685039369' F='Inh'/><Cell N='LocPinY' V='0.09842519685039369' F='Inh'/><Cell N='BeginX' V='4.609306101933532' F='PAR(PNT(Sheet.269!Connections.X2,Sheet.269!Connections.Y2))'/><Cell N='BeginY' V='5.580709229082364' F='PAR(PNT(Sheet.269!Connections.X2,Sheet.269!Connections.Y2))'/><Cell N='EndX' V='4.766786416894163' U='MM' F='PAR(PNT(Sheet.270!Connections.X4,Sheet.270!Connections.Y4))'/><Cell N='EndY' V='5.581607017363064' F='PAR(PNT(Sheet.270!Connections.X4,Sheet.270!Connections.Y4))'/><Cell N='LayerMember' V='0'/><Cell N='BegTrigger' V='2' F='_XFTRIGGER(Sheet.269!EventXFMod)'/><Cell N='EndTrigger' V='2' F='_XFTRIGGER(Sheet.270!EventXFMod)'/><Cell N='TxtPinX' V='0.09797630271004304' F='Inh'/><Cell N='TxtPinY' V='0.09887409099074168' F='Inh'/><Cell N='ShapeShdwShow' V='2'/><Section N='Control'><Row N='TextPosition'><Cell N='X' V='0.09797630271004346'/><Cell N='Y' V='0.09887409099074079'/><Cell N='XDyn' V='0.09797630271004304' F='Inh'/><Cell N='YDyn' V='0.09887409099074168' F='Inh'/></Row></Section><Section N='Character'><Row IX='0'><Cell N='Font' V='Times New Roman'/><Cell N='ComplexScriptFont' V='Times New Roman'/></Row></Section><Section N='Geometry' IX='0'><Row T='MoveTo' IX='1'><Cell N='X' V='0.01968503937007871'/><Cell N='Y' V='0.09797630271004376'/></Row><Row T='LineTo' IX='2'><Cell N='X' V='0.09350393700787407'/><Cell N='Y' V='0.09797630271004376'/></Row><Row T='LineTo' IX='3'><Cell N='X' V='0.09350393700787407'/><Cell N='Y' V='0.09887409099074329'/></Row><Row T='LineTo' IX='4'><Cell N='X' V='0.1771653543307092'/><Cell N='Y' V='0.09887409099074329'/></Row></Section></Shape><Shape ID='272' Type='Foreign' LineStyle='2' FillStyle='2' TextStyle='2'><Cell N='PinX' V='5.771576517737375'/><Cell N='PinY' V='5.597638362940634'/><Cell N='Width' V='0.2811023622047244'/><Cell N='Height' V='0.2708661417322835'/><Cell N='LocPinX' V='0.1405511811023622' F='Width*0.5'/><Cell N='LocPinY' V='0.1354330708661417' F='Height*0.5'/><Cell N='Angle' V='0'/><Cell N='FlipX' V='0'/><Cell N='FlipY' V='0'/><Cell N='ResizeMode' V='0'/><Cell N='ImgOffsetX' V='0' F='ImgWidth*0'/><Cell N='ImgOffsetY' V='0' F='ImgHeight*0'/><Cell N='ImgWidth' V='0.2811023622047244' F='Width*1'/><Cell N='ImgHeight' V='0.2708661417322835' F='Height*1'/><Cell N='ClippingPath' V='' F='No Formula' E='#N/A'/><Cell N='TxtPinX' V='0.1405511811023622' F='Width*0.5'/><Cell N='TxtPinY' V='0' F='Height*0'/><Cell N='TxtWidth' V='0.2811023622047244' F='Width*1'/><Cell N='TxtHeight' V='0' F='Height*0'/><Cell N='TxtLocPinX' V='0.1405511811023622' F='TxtWidth*0.5'/><Cell N='TxtLocPinY' V='0' F='TxtHeight*0.5'/><Cell N='TxtAngle' V='0'/><Cell N='VerticalAlign' V='0'/><Cell N='ObjType' V='1'/><Cell N='ShapeShdwShow' V='2'/><Section N='Character'><Row IX='0'><Cell N='Font' V='Times New Roman'/><Cell N='ComplexScriptFont' V='Times New Roman'/></Row></Section><Section N='Geometry' IX='0'><Cell N='NoFill' V='0'/><Cell N='NoLine' V='0'/><Cell N='NoShow' V='0'/><Cell N='NoSnap' V='0'/><Cell N='NoQuickDrag' V='0'/><Row T='RelMoveTo' IX='1'><Cell N='X' V='0'/><Cell N='Y' V='0'/></Row><Row T='RelLineTo' IX='2'><Cell N='X' V='1'/><Cell N='Y' V='0'/></Row><Row T='RelLineTo' IX='3'><Cell N='X' V='1'/><Cell N='Y' V='1'/></Row><Row T='RelLineTo' IX='4'><Cell N='X' V='0'/><Cell N='Y' V='1'/></Row><Row T='RelLineTo' IX='5'><Cell N='X' V='0'/><Cell N='Y' V='0'/></Row></Section><ForeignData ForeignType='Object' ObjectType='33280' ShowAsIcon='0' ObjectWidth='0.28110236220472' ObjectHeight='0.27086614173228'><Rel r:id='rId3'/></ForeignData></Shape><Shape ID='273' NameU='Dynamic connector.273' Name='动态连接线.273' Type='Shape' Master='5'><Cell N='PinX' V='5.536635474153659' F='Inh'/><Cell N='PinY' V='5.58214237519122' F='Inh'/><Cell N='Width' V='0.2490159454351346' F='GUARD(EndX-BeginX)'/><Cell N='Height' V='0.1968503937007874' F='GUARD(0.19685039370079DL)'/><Cell N='LocPinX' V='0.1245079727175673' F='Inh'/><Cell N='LocPinY' V='0.09842519685039369' F='Inh'/><Cell N='BeginX' V='5.412127501436092' F='PAR(PNT(Sheet.270!Connections.X2,Sheet.270!Connections.Y2))'/><Cell N='BeginY' V='5.581607017363064' F='PAR(PNT(Sheet.270!Connections.X2,Sheet.270!Connections.Y2))'/><Cell N='EndX' V='5.661143446871226'/><Cell N='EndY' V='5.582677733019375'/><Cell N='LayerMember' V='0'/><Cell N='BegTrigger' V='2' F='_XFTRIGGER(Sheet.270!EventXFMod)'/><Cell N='EndTrigger' V='1' F='_XFTRIGGER(EventXFMod)'/><Cell N='TxtPinX' V='0.1245079711079602' F='Inh'/><Cell N='TxtPinY' V='0.09842519834637786' F='Inh'/><Cell N='ConFixedCode' V='3'/><Cell N='ShapeShdwShow' V='2'/><Section N='Control'><Row N='TextPosition'><Cell N='X' V='0.1245079711079602'/><Cell N='Y' V='0.09842519834637786'/><Cell N='XDyn' V='0.1245079711079602' F='Inh'/><Cell N='YDyn' V='0.09842519834637786' F='Inh'/></Row></Section><Section N='Character'><Row IX='0'><Cell N='Font' V='Times New Roman'/><Cell N='ComplexScriptFont' V='Times New Roman'/></Row></Section><Section N='Geometry' IX='0'><Row T='MoveTo' IX='1'><Cell N='Y' V='0.09788983902223514'/></Row><Row T='LineTo' IX='2'><Cell N='X' V='0.2490159454351435'/><Cell N='Y' V='0.09896055467855192'/></Row><Row T='LineTo' IX='3' Del='1'/></Section></Shape><Shape ID='339' Type='Foreign' LineStyle='2' FillStyle='2' TextStyle='2'><Cell N='PinX' V='5.706977680932588'/><Cell N='PinY' V='5.854724977113865'/><Cell N='Width' V='0.2637795275590552'/><Cell N='Height' V='0.1803149606299213'/><Cell N='LocPinX' V='0.1318897637795276' F='Width*0.5'/><Cell N='LocPinY' V='0.09015748031496063' F='Height*0.5'/><Cell N='Angle' V='0'/><Cell N='FlipX' V='0'/><Cell N='FlipY' V='0'/><Cell N='ResizeMode' V='0'/><Cell N='ImgOffsetX' V='0' F='ImgWidth*0'/><Cell N='ImgOffsetY' V='0' F='ImgHeight*0'/><Cell N='ImgWidth' V='0.2637795275590552' F='Width*1'/><Cell N='ImgHeight' V='0.1803149606299213' F='Height*1'/><Cell N='ClippingPath' V='' F='No Formula' E='#N/A'/><Cell N='TxtPinX' V='0.1318897637795276' F='Width*0.5'/><Cell N='TxtPinY' V='0' F='Height*0'/><Cell N='TxtWidth' V='0.2637795275590552' F='Width*1'/><Cell N='TxtHeight' V='0' F='Height*0'/><Cell N='TxtLocPinX' V='0.1318897637795276' F='TxtWidth*0.5'/><Cell N='TxtLocPinY' V='0' F='TxtHeight*0.5'/><Cell N='TxtAngle' V='0'/><Cell N='VerticalAlign' V='0'/><Cell N='ShapeShdwShow' V='2'/><Section N='Character'><Row IX='0'><Cell N='Font' V='Times New Roman'/><Cell N='ComplexScriptFont' V='Times New Roman'/></Row></Section><Section N='Geometry' IX='0'><Cell N='NoFill' V='0'/><Cell N='NoLine' V='0'/><Cell N='NoShow' V='0'/><Cell N='NoSnap' V='0'/><Cell N='NoQuickDrag' V='0'/><Row T='RelMoveTo' IX='1'><Cell N='X' V='0'/><Cell N='Y' V='0'/></Row><Row T='RelLineTo' IX='2'><Cell N='X' V='1'/><Cell N='Y' V='0'/></Row><Row T='RelLineTo' IX='3'><Cell N='X' V='1'/><Cell N='Y' V='1'/></Row><Row T='RelLineTo' IX='4'><Cell N='X' V='0'/><Cell N='Y' V='1'/></Row><Row T='RelLineTo' IX='5'><Cell N='X' V='0'/><Cell N='Y' V='0'/></Row></Section><ForeignData ForeignType='Object' ObjectType='33280' ShowAsIcon='0' ObjectWidth='0.26377952755906' ObjectHeight='0.18031496062992'><Rel r:id='rId6'/></ForeignData></Shape><Shape ID='420' NameU='Rectangle.420' Name='矩形.420' Type='Shape' Master='4'><Cell N='PinX' V='2.078357089601881'/><Cell N='PinY' V='5.417000117889234'/><Cell N='Width' V='1.137467134268362'/><Cell N='Height' V='0.205873417167252'/><Cell N='LocPinX' V='0.5687335671341809' F='Inh'/><Cell N='LocPinY' V='0.102936708583626' F='Inh'/><Cell N='ObjType' V='1'/><Cell N='FillPattern' V='0' F='THEMEGUARD(0)'/><Cell N='ShdwPattern' V='0' F='THEMEGUARD(0)'/><Cell N='LineGradientEnabled' V='0'/><Cell N='FillGradientEnabled' V='0' F='THEMEGUARD(FALSE)'/><Cell N='LineWeight' V='Themed' F='THEMEVAL()'/><Cell N='LineColor' V='#c05046' F='THEMEGUARD(THEMEVAL("AccentColor"))'/><Cell N='LinePattern' V='1'/><Cell N='LeftMargin' V='0.02777777777777778' U='PT'/><Cell N='RightMargin' V='0.02777777777777778' U='PT'/><Cell N='TopMargin' V='0.02777777777777778' U='PT'/><Cell N='BottomMargin' V='0.02777777777777778' U='PT'/><Cell N='SketchEnabled' V='0'/><Section N='Connection'><Row T='Connection' IX='0'><Cell N='X' V='0.5687335671341809' F='Inh'/></Row><Row T='Connection' IX='1'><Cell N='X' V='1.137467134268362' F='Inh'/><Cell N='Y' V='0.102936708583626' F='Inh'/></Row><Row T='Connection' IX='2'><Cell N='X' V='0.5687335671341809' F='Inh'/><Cell N='Y' V='0.205873417167252' F='Inh'/></Row><Row T='Connection' IX='3'><Cell N='Y' V='0.102936708583626' F='Inh'/></Row><Row T='Connection' IX='4'><Cell N='X' V='0.5687335671341809' F='Inh'/><Cell N='Y' V='0.102936708583626' F='Inh'/></Row></Section><Section N='Character'><Row IX='0'><Cell N='Font' V='Times New Roman'/><Cell N='Color' V='0'/><Cell N='Style' V='0'/><Cell N='Size' V='0.1666666666666667' U='PT'/><Cell N='AsianFont' V='SimSun'/><Cell N='ComplexScriptFont' V='Times New Roman'/></Row></Section><Section N='Geometry' IX='0'><Row T='LineTo' IX='2'><Cell N='X' V='1.137467134268362' F='Inh'/></Row><Row T='LineTo' IX='3'><Cell N='X' V='1.137467134268362' F='Inh'/><Cell N='Y' V='0.205873417167252' F='Inh'/></Row><Row T='LineTo' IX='4'><Cell N='Y' V='0.205873417167252' F='Inh'/></Row></Section><Text><cp IX='0'/>ResNext-101
</Text></Shape><Shape ID='421' NameU='Dynamic connector.421' Name='动态连接线.421' Type='Shape' Master='5'><Cell N='PinX' V='2.798391234469015' U='MM' F='Inh'/><Cell N='PinY' V='5.498854673485805' F='Inh'/><Cell N='Width' V='0.3026011554659083' U='MM' F='GUARD(EndX-BeginX)'/><Cell N='Height' V='0.1968503937007874' F='GUARD(0.19685039370079DL)'/><Cell N='LocPinX' V='0.1513005777329537' U='MM' F='Inh'/><Cell N='LocPinY' V='0.09842519685039369' F='Inh'/><Cell N='BeginX' V='2.647090656736062' F='PAR(PNT(Sheet.420!Connections.X2,Sheet.420!Connections.Y2))'/><Cell N='BeginY' V='5.417000117889234' F='PAR(PNT(Sheet.420!Connections.X2,Sheet.420!Connections.Y2))'/><Cell N='EndX' V='2.94969181220197' U='MM' F='PAR(PNT(Sheet.219!Connections.X4,Sheet.219!Connections.Y4))'/><Cell N='EndY' V='5.580709229082375' F='PAR(PNT(Sheet.219!Connections.X4,Sheet.219!Connections.Y4))'/><Cell N='LayerMember' V='0'/><Cell N='BegTrigger' V='2' F='_XFTRIGGER(Sheet.420!EventXFMod)'/><Cell N='EndTrigger' V='2' F='_XFTRIGGER(Sheet.219!EventXFMod)'/><Cell N='TxtPinX' V='0.1513005793094639' F='Inh'/><Cell N='TxtPinY' V='0.0984251936897638' F='Inh'/><Cell N='ShapeRouteStyle' V='16'/><Cell N='ConLineRouteExt' V='1'/><Section N='Control'><Row N='TextPosition'><Cell N='X' V='0.1513005793094639'/><Cell N='Y' V='0.0984251936897638'/><Cell N='XDyn' V='0.1513005793094639' F='Inh'/><Cell N='YDyn' V='0.0984251936897638' F='Inh'/></Row></Section><Section N='Character'><Row IX='0'><Cell N='Font' V='Times New Roman'/><Cell N='ComplexScriptFont' V='Times New Roman'/></Row></Section><Section N='Geometry' IX='0'><Row T='MoveTo' IX='1'><Cell N='Y' V='0.01657064125382224'/></Row><Row T='LineTo' IX='2'><Cell N='X' V='0.3026011554659065'/><Cell N='Y' V='0.1802797524469648'/></Row><Row T='LineTo' IX='3' Del='1'/></Section></Shape><Shape ID='422' NameU='Dynamic connector.422' Name='动态连接线.422' Type='Shape' Master='5'><Cell N='PinX' V='1.362692167250881' U='MM' F='Inh'/><Cell N='PinY' V='5.498854673222829' F='Inh'/><Cell N='Width' V='0.2938627104336367' U='MM' F='GUARD(EndX-BeginX)'/><Cell N='Height' V='-0.1968503937007874' F='GUARD(-0.19685039370079DL)'/><Cell N='LocPinX' V='0.1469313552168183' U='MM' F='Inh'/><Cell N='LocPinY' V='-0.09842519685039369' F='Inh'/><Cell N='BeginX' V='1.215760812034063'/><Cell N='BeginY' V='5.580709228556424'/><Cell N='EndX' V='1.5096235224677' U='MM' F='PAR(PNT(Sheet.420!Connections.X4,Sheet.420!Connections.Y4))'/><Cell N='EndY' V='5.417000117889234' F='PAR(PNT(Sheet.420!Connections.X4,Sheet.420!Connections.Y4))'/><Cell N='LayerMember' V='0'/><Cell N='BegTrigger' V='1' F='_XFTRIGGER(EventXFMod)'/><Cell N='EndTrigger' V='2' F='_XFTRIGGER(Sheet.420!EventXFMod)'/><Cell N='TxtPinX' V='0.1469313502311707' F='Inh'/><Cell N='TxtPinY' V='-0.09842519368976355' F='Inh'/><Cell N='ShapeRouteStyle' V='16'/><Cell N='ConLineRouteExt' V='1'/><Section N='Control'><Row N='TextPosition'><Cell N='X' V='0.1469313502311707'/><Cell N='Y' V='-0.09842519368976353'/><Cell N='XDyn' V='0.1469313502311707' F='Inh'/><Cell N='YDyn' V='-0.09842519368976355' F='Inh'/></Row></Section><Section N='Character'><Row IX='0'><Cell N='Font' V='Times New Roman'/><Cell N='ComplexScriptFont' V='Times New Roman'/></Row></Section><Section N='Geometry' IX='0'><Row T='MoveTo' IX='1'><Cell N='Y' V='-0.01657064151679588'/></Row><Row T='LineTo' IX='2'><Cell N='X' V='0.2938627104336362'/><Cell N='Y' V='-0.1802797521839912'/></Row><Row T='LineTo' IX='3' Del='1'/></Section></Shape><Shape ID='424' Type='Shape' Master='4'><Cell N='PinX' V='2.096456662591849'/><Cell N='PinY' V='5.701772056610995'/><Cell N='Width' V='2.854330617567459'/><Cell N='Height' V='1.127953085100227'/><Cell N='LocPinX' V='1.42716530878373' F='Inh'/><Cell N='LocPinY' V='0.5639765425501135' F='Inh'/><Cell N='FillPattern' V='0'/><Cell N='FillGradientEnabled' V='0'/><Cell N='RotateGradientWithShape' V='0'/><Cell N='UseGroupGradient' V='0'/><Cell N='LinePattern' V='16'/><Section N='Connection'><Row T='Connection' IX='0'><Cell N='X' V='1.42716530878373' F='Inh'/></Row><Row T='Connection' IX='1'><Cell N='X' V='2.854330617567459' F='Inh'/><Cell N='Y' V='0.5639765425501135' F='Inh'/></Row><Row T='Connection' IX='2'><Cell N='X' V='1.42716530878373' F='Inh'/><Cell N='Y' V='1.127953085100227' F='Inh'/></Row><Row T='Connection' IX='3'><Cell N='Y' V='0.5639765425501135' F='Inh'/></Row><Row T='Connection' IX='4'><Cell N='X' V='1.42716530878373' F='Inh'/><Cell N='Y' V='0.5639765425501135' F='Inh'/></Row></Section><Section N='Character'><Row IX='0'><Cell N='Font' V='Times New Roman'/><Cell N='ComplexScriptFont' V='Times New Roman'/></Row></Section><Section N='Geometry' IX='0'><Row T='LineTo' IX='2'><Cell N='X' V='2.854330617567459' F='Inh'/></Row><Row T='LineTo' IX='3'><Cell N='X' V='2.854330617567459' F='Inh'/><Cell N='Y' V='1.127953085100227' F='Inh'/></Row><Row T='LineTo' IX='4'><Cell N='Y' V='1.127953085100227' F='Inh'/></Row></Section></Shape><Shape ID='425' Type='Foreign' LineStyle='2' FillStyle='2' TextStyle='2'><Cell N='PinX' V='7.587007833482125'/><Cell N='PinY' V='5.579513569984835'/><Cell N='Width' V='0.2811023622047244'/><Cell N='Height' V='0.2708661417322835'/><Cell N='LocPinX' V='0.1405511811023622' F='Width*0.5'/><Cell N='LocPinY' V='0.1354330708661417' F='Height*0.5'/><Cell N='Angle' V='0'/><Cell N='FlipX' V='0'/><Cell N='FlipY' V='0'/><Cell N='ResizeMode' V='0'/><Cell N='ImgOffsetX' V='0' F='ImgWidth*0'/><Cell N='ImgOffsetY' V='0' F='ImgHeight*0'/><Cell N='ImgWidth' V='0.2811023622047244' F='Width*1'/><Cell N='ImgHeight' V='0.2708661417322835' F='Height*1'/><Cell N='ClippingPath' V='' F='No Formula' E='#N/A'/><Cell N='TxtPinX' V='0.1405511811023622' F='Width*0.5'/><Cell N='TxtPinY' V='0' F='Height*0'/><Cell N='TxtWidth' V='0.2811023622047244' F='Width*1'/><Cell N='TxtHeight' V='0' F='Height*0'/><Cell N='TxtLocPinX' V='0.1405511811023622' F='TxtWidth*0.5'/><Cell N='TxtLocPinY' V='0' F='TxtHeight*0.5'/><Cell N='TxtAngle' V='0'/><Cell N='VerticalAlign' V='0'/><Cell N='ObjType' V='1'/><Section N='Character'><Row IX='0'><Cell N='Font' V='Times New Roman'/><Cell N='ComplexScriptFont' V='Times New Roman'/></Row></Section><Section N='Geometry' IX='0'><Cell N='NoFill' V='0'/><Cell N='NoLine' V='0'/><Cell N='NoShow' V='0'/><Cell N='NoSnap' V='0'/><Cell N='NoQuickDrag' V='0'/><Row T='RelMoveTo' IX='1'><Cell N='X' V='0'/><Cell N='Y' V='0'/></Row><Row T='RelLineTo' IX='2'><Cell N='X' V='1'/><Cell N='Y' V='0'/></Row><Row T='RelLineTo' IX='3'><Cell N='X' V='1'/><Cell N='Y' V='1'/></Row><Row T='RelLineTo' IX='4'><Cell N='X' V='0'/><Cell N='Y' V='1'/></Row><Row T='RelLineTo' IX='5'><Cell N='X' V='0'/><Cell N='Y' V='0'/></Row></Section><ForeignData ForeignType='Object' ObjectType='33280' ShowAsIcon='0' ObjectWidth='0.28110236220472' ObjectHeight='0.27086614173228'><Rel r:id='rId10'/></ForeignData></Shape><Shape ID='302' Type='Shape' LineStyle='1' FillStyle='1' TextStyle='8'><Cell N='PinX' V='4.707731309655837'/><Cell N='PinY' V='6.133202668973155'/><Cell N='Width' V='2.362204702665631'/><Cell N='Height' V='0.1666666666666696'/><Cell N='LocPinX' V='1.181102351332815' F='Width*0.5'/><Cell N='LocPinY' V='0.08333333333333481' F='Height*0.5'/><Cell N='Angle' V='0'/><Cell N='FlipX' V='0'/><Cell N='FlipY' V='0'/><Cell N='ResizeMode' V='0'/><Cell N='EventDblClick' V='0' F='OPENTEXTWIN()'/><Cell N='LinePattern' V='0' F='THEMEGUARD(0)'/><Cell N='FillPattern' V='0' F='THEMEGUARD(0)'/><Cell N='ShdwPattern' V='0' F='THEMEGUARD(0)'/><Cell N='LineGradientEnabled' V='0' F='THEMEGUARD(FALSE)'/><Cell N='FillGradientEnabled' V='0' F='THEMEGUARD(FALSE)'/><Cell N='SketchEnabled' V='0'/><Section N='Character'><Row IX='0'><Cell N='Font' V='Times New Roman'/><Cell N='Color' V='0'/><Cell N='Style' V='0'/><Cell N='Size' V='0.1666666666666667' U='PT'/><Cell N='AsianFont' V='SimSun'/><Cell N='ComplexScriptFont' V='Times New Roman'/></Row></Section><Section N='Geometry' IX='0'><Cell N='NoFill' V='0'/><Cell N='NoLine' V='0'/><Cell N='NoShow' V='0'/><Cell N='NoSnap' V='0'/><Cell N='NoQuickDrag' V='0'/><Row T='RelMoveTo' IX='1'><Cell N='X' V='0'/><Cell N='Y' V='0'/></Row><Row T='RelLineTo' IX='2'><Cell N='X' V='1'/><Cell N='Y' V='0'/></Row><Row T='RelLineTo' IX='3'><Cell N='X' V='1'/><Cell N='Y' V='1'/></Row><Row T='RelLineTo' IX='4'><Cell N='X' V='0'/><Cell N='Y' V='1'/></Row><Row T='RelLineTo' IX='5'><Cell N='X' V='0'/><Cell N='Y' V='0'/></Row></Section><Text><cp IX='0'/>video captioning generation
</Text></Shape></Shapes><Connects><Connect FromSheet='422' FromCell='EndX' FromPart='12' ToSheet='420' ToCell='Connections.X4' ToPart='103'/><Connect FromSheet='421' FromCell='EndX' FromPart='12' ToSheet='219' ToCell='Connections.X4' ToPart='103'/><Connect FromSheet='421' FromCell='BeginX' FromPart='9' ToSheet='420' ToCell='Connections.X2' ToPart='101'/><Connect FromSheet='333' FromCell='EndX' FromPart='12' ToSheet='219' ToCell='Connections.X4' ToPart='103'/><Connect FromSheet='333' FromCell='BeginX' FromPart='9' ToSheet='332' ToCell='Connections.X2' ToPart='101'/><Connect FromSheet='317' FromCell='EndX' FromPart='12' ToSheet='332' ToCell='Connections.X4' ToPart='103'/><Connect FromSheet='285' FromCell='EndX' FromPart='12' ToSheet='281' ToCell='Connections.X1' ToPart='100'/><Connect FromSheet='284' FromCell='EndX' FromPart='12' ToSheet='279' ToCell='Connections.X1' ToPart='100'/><Connect FromSheet='276' FromCell='EndX' FromPart='12' ToSheet='281' ToCell='Connections.X5' ToPart='104'/><Connect FromSheet='273' FromCell='BeginX' FromPart='9' ToSheet='270' ToCell='Connections.X2' ToPart='101'/><Connect FromSheet='249' FromCell='BeginX' FromPart='9' ToSheet='219' ToCell='Connections.X2' ToPart='101'/><Connect FromSheet='257' FromCell='EndX' FromPart='12' ToSheet='253' ToCell='Connections.X3' ToPart='102'/><Connect FromSheet='258' FromCell='BeginX' FromPart='9' ToSheet='253' ToCell='Connections.X4' ToPart='103'/><Connect FromSheet='259' FromCell='EndX' FromPart='12' ToSheet='253' ToCell='Connections.X5' ToPart='104'/><Connect FromSheet='271' FromCell='BeginX' FromPart='9' ToSheet='269' ToCell='Connections.X2' ToPart='101'/><Connect FromSheet='271' FromCell='EndX' FromPart='12' ToSheet='270' ToCell='Connections.X4' ToPart='103'/><Connect FromSheet='284' FromCell='BeginX' FromPart='9' ToSheet='265' ToCell='PinX' ToPart='3'/><Connect FromSheet='249' FromCell='EndX' FromPart='12' ToSheet='265' ToCell='PinX' ToPart='3'/><Connect FromSheet='258' FromCell='EndX' FromPart='12' ToSheet='254' ToCell='PinX' ToPart='3'/></Connects></PageContents>
