# Supplementary material for: Video captioning based on vision transformer and reinforcement learning
Source: PeerJ Comput Sci. 2022 Mar 16;8:e916. doi: 10.7717/peerj-cs.916 (PMC9044334; doi:10.7717/peerj-cs.916)
Supplement: Supplemental Information 1 — The model includes three parts: feature extraction, video captioning generation, reward mechanism (Policy Gradient). L is the number of transformer encoder blocks in the encoder of the model, ws is the word sequence generated by the model, and r(*) is the reinforcement learning reward function [file peerj-cs-08-916-s001.vsdx › visio/windows.xml]

<?xml version='1.0' encoding='utf-8' ?>
<Windows ClientWidth='1440' ClientHeight='679' xmlns='http://schemas.microsoft.com/office/visio/2012/main' xmlns:r='http://schemas.openxmlformats.org/officeDocument/2006/relationships' xml:space='preserve'><Window ID='0' WindowType='Drawing' WindowState='1073741824' WindowLeft='-8' WindowTop='-31' WindowWidth='1456' WindowHeight='718' ContainerType='Page' Page='0' ViewScale='0.75' ViewCenterX='5.5750842986671' ViewCenterY='6.2992125240929'><ShowRulers>1</ShowRulers><ShowGrid>0</ShowGrid><ShowPageBreaks>1</ShowPageBreaks><ShowGuides>1</ShowGuides><ShowConnectionPoints>1</ShowConnectionPoints><GlueSettings>9</GlueSettings><SnapSettings>295</SnapSettings><SnapExtensions>34</SnapExtensions><SnapAngles/><DynamicGridEnabled>1</DynamicGridEnabled><TabSplitterPos>0.5</TabSplitterPos></Window><Window ID='1' WindowType='Stencil' WindowState='1025' WindowLeft='0' WindowTop='-10' WindowWidth='247' WindowHeight='672' Document='C:\Program Files (x86)\Microsoft Office\Root\Office16\visio content\2052\ARROWS_M.vssx' ParentWindow='0'><StencilGroup>10</StencilGroup><StencilGroupPos>1</StencilGroupPos></Window><Window ID='2' WindowType='Stencil' WindowState='1025' WindowLeft='0' WindowTop='-10' WindowWidth='247' WindowHeight='672' Document='C:\Program Files (x86)\Microsoft Office\Root\Office16\visio content\2052\EPC_M.vssx' ParentWindow='0'><StencilGroup>10</StencilGroup><StencilGroupPos>2</StencilGroupPos></Window><Window ID='3' WindowType='Stencil' WindowState='67109889' WindowLeft='0' WindowTop='-10' WindowWidth='247' WindowHeight='672' Document='C:\Program Files (x86)\Microsoft Office\Root\Office16\visio content\2052\BASIC_M.vssx' ParentWindow='0'><StencilGroup>10</StencilGroup><StencilGroupPos>3</StencilGroupPos></Window></Windows>
