# Supplementary material for: Video captioning based on vision transformer and reinforcement learning
Source: PeerJ Comput Sci. 2022 Mar 16;8:e916. doi: 10.7717/peerj-cs.916 (PMC9044334; doi:10.7717/peerj-cs.916)
Supplement: Supplemental Information 3 — Specifically, the encoding block first inputs the features into Layer Norm and Multi-Head Attention, and then sends them to the MLP block. [file peerj-cs-08-916-s003.vsdx › docProps/custom.xml]

<?xml version="1.0" encoding="UTF-8" standalone="yes"?>
<Properties xmlns="http://schemas.openxmlformats.org/officeDocument/2006/custom-properties" xmlns:vt="http://schemas.openxmlformats.org/officeDocument/2006/docPropsVTypes"><property fmtid="{D5CDD505-2E9C-101B-9397-08002B2CF9AE}" pid="2" name="_VPID_ALTERNATENAMES"><vt:lpwstr></vt:lpwstr></property><property fmtid="{D5CDD505-2E9C-101B-9397-08002B2CF9AE}" pid="3" name="BuildNumberCreated"><vt:i4>1075197942</vt:i4></property><property fmtid="{D5CDD505-2E9C-101B-9397-08002B2CF9AE}" pid="4" name="BuildNumberEdited"><vt:i4>1074804726</vt:i4></property><property fmtid="{D5CDD505-2E9C-101B-9397-08002B2CF9AE}" pid="5" name="IsMetric"><vt:bool>true</vt:bool></property><property fmtid="{D5CDD505-2E9C-101B-9397-08002B2CF9AE}" pid="6" name="TimeEdited"><vt:filetime>2021-11-08T15:21:53Z</vt:filetime></property></Properties>
