# Supplementary material for: Video captioning based on vision transformer and reinforcement learning
Source: PeerJ Comput Sci. 2022 Mar 16;8:e916. doi: 10.7717/peerj-cs.916 (PMC9044334; doi:10.7717/peerj-cs.916)
Supplement: Supplemental Information 3 — Specifically, the encoding block first inputs the features into Layer Norm and Multi-Head Attention, and then sends them to the MLP block. [file peerj-cs-08-916-s003.vsdx › visio/masters/masters.xml]

<?xml version='1.0' encoding='utf-8' ?>
<Masters xmlns='http://schemas.microsoft.com/office/visio/2012/main' xmlns:r='http://schemas.openxmlformats.org/officeDocument/2006/relationships' xml:space='preserve'><Master ID='2' NameU='Square' IsCustomNameU='1' Name='正方形' IsCustomName='1' Prompt='拖到绘图页上。' IconSize='1' AlignName='2' MatchByName='0' IconUpdate='1' UniqueID='{08840B52-0004-0000-8E40-00608CF305B2}' BaseID='{CA4BD435-ACDA-4E69-93B6-4BE97F7387BB}' PatternFlags='0' Hidden='0' MasterType='2'><PageSheet LineStyle='0' FillStyle='0' TextStyle='0'><Cell N='PageWidth' V='3.937007874015748' U='MM'/><Cell N='PageHeight' V='3.937007874015748' U='MM'/><Cell N='ShdwOffsetX' V='0.1181102362204724'/><Cell N='ShdwOffsetY' V='-0.1181102362204724'/><Cell N='PageScale' V='0.03937007874015748' U='MM'/><Cell N='DrawingScale' V='0.03937007874015748' U='MM'/><Cell N='DrawingSizeType' V='0'/><Cell N='DrawingScaleType' V='0'/><Cell N='InhibitSnap' V='0'/><Cell N='PageLockReplace' V='0' U='BOOL'/><Cell N='PageLockDuplicate' V='0' U='BOOL'/><Cell N='UIVisibility' V='0'/><Cell N='ShdwType' V='0'/><Cell N='ShdwObliqueAngle' V='0'/><Cell N='ShdwScaleFactor' V='1'/><Cell N='DrawingResizeType' V='1'/><Cell N='ShapeKeywords' V='基本,形状,几何图形,多边形,矩形,右,角,四边'/></PageSheet><Icon>
AAABAAEAICAQFwAAAADoAgAAFgAAACgAAAAgAAAAQAAAAAEABAAAAAAAgAIAAAAAAAAAAAAAAAAAA
AAAAAAAAAAAAACAAACAAAAAgIAAgAAAAIAAgACAgAAAgICAAMDAwAAAAP8AAP8AAAD//wD/AAAA/w
D/AP//AAD///8AAAAAAAAAAAAAAAAAAAAAAAB3d3d3d3d3d3d3d3d3dwAA//////////////////9
wAP//////////////////cAD//////////////////3AA//////////////////9wAP//////////
////////cAD//////////////////3AA//////////////////9wAP//////////////////cAD//
////////////////3AA//////////////////9wAP//////////////////cAD///////////////
///3AA//////////////////9wAP//////////////////cAD//////////////////3AA///////
///////////9wAP//////////////////cAD//////////////////3AA//////////////////9w
AP//////////////////cAD//////////////////3AA//////////////////9wAP///////////
///////cAD//////////////////3AA//////////////////9wAP//////////////////cAD///
///////////////3AA//////////////////9wAAAAAAAAAAAAAAAAAAAAAAAAAAAAAAAAAAAAAAA
AAAD/////gAAAAcAAAAHAAAABwAAAAcAAAAHAAAABwAAAAcAAAAHAAAABwAAAAcAAAAHAAAABwAAA
AcAAAAHAAAABwAAAAcAAAAHAAAABwAAAAcAAAAHAAAABwAAAAcAAAAHAAAABwAAAAcAAAAHAAAABw
AAAAcAAAAGAAAAB/////w==</Icon><Rel r:id='rId1'/></Master><Master ID='4' NameU='Rectangle' IsCustomNameU='1' Name='矩形' IsCustomName='1' Prompt='拖到绘图页上。' IconSize='1' AlignName='2' MatchByName='0' IconUpdate='1' UniqueID='{08840884-0002-0000-8E40-00608CF305B2}' BaseID='{265F9737-E810-4325-8E7F-292854638452}' PatternFlags='0' Hidden='0' MasterType='2'><PageSheet LineStyle='0' FillStyle='0' TextStyle='0'><Cell N='PageWidth' V='3.937007874015748' U='MM'/><Cell N='PageHeight' V='3.937007874015748' U='MM'/><Cell N='ShdwOffsetX' V='0.1181102362204724'/><Cell N='ShdwOffsetY' V='-0.1181102362204724'/><Cell N='PageScale' V='0.03937007874015748' U='MM'/><Cell N='DrawingScale' V='0.03937007874015748' U='MM'/><Cell N='DrawingSizeType' V='0'/><Cell N='DrawingScaleType' V='0'/><Cell N='InhibitSnap' V='0'/><Cell N='PageLockReplace' V='0' U='BOOL'/><Cell N='PageLockDuplicate' V='0' U='BOOL'/><Cell N='UIVisibility' V='0'/><Cell N='ShdwType' V='0'/><Cell N='ShdwObliqueAngle' V='0'/><Cell N='ShdwScaleFactor' V='1'/><Cell N='DrawingResizeType' V='1'/><Cell N='ShapeKeywords' V='基本,形状,几何图形,多边形,矩形,右,角,四边'/></PageSheet><Icon>
AAABAAEAICAQFwAAAADoAgAAFgAAACgAAAAgAAAAQAAAAAEABAAAAAAAgAIAAAAAAAAAAAAAAAAAA
AAAAAAAAAAAAACAAACAAAAAgIAAgAAAAIAAgACAgAAAgICAAMDAwAAAAP8AAP8AAAD//wD/AAAA/w
D/AP//AAD///8AAAAAAAAAAAAAAAAAAAAAAAAAAAAAAAAAAAAAAAAAAAAAAAAAAAAAAAAAAAAAAAA
AAAAAAAAAAAAAAAAAAAAAAAAAAAAAAAAAAAAAAAAAAAAAiIiIiIiIiIiIiIiIiIhwAP//////////
////////cAD//////////////////3AA//////////////////9wAP//////////////////cAD//
////////////////3AA//////////////////9wAP//////////////////cAD///////////////
///3AA//////////////////9wAP//////////////////cAD//////////////////3AA///////
///////////9wAP//////////////////cAD//////////////////3AA//////////////////9w
AP//////////////////cAD//////////////////3AA//////////////////9wAP///////////
///////cAD//////////////////3AAd3d3d3d3d3d3d3d3d3cAAAAAAAAAAAAAAAAAAAAAAAAAAA
AAAAAAAAAAAAAAAAAAAAAAAAAAAAAAAAAAAAAAAAAAAAAAAAAAAAAAAAAAAAAAAAAAAAAAAAAAAAA
AAAD/////////////////////gAAAAYAAAAHAAAABwAAAAcAAAAHAAAABwAAAAcAAAAHAAAABwAAA
AcAAAAHAAAABwAAAAcAAAAHAAAABwAAAAcAAAAHAAAABwAAAAcAAAAHAAAABwAAAAYAAAAH//////
////////////////////w==</Icon><Rel r:id='rId2'/></Master><Master ID='5' NameU='Dynamic connector' IsCustomNameU='1' Name='动态连接线' IsCustomName='1' Prompt='T' IconSize='1' AlignName='2' MatchByName='1' IconUpdate='0' UniqueID='{002A9503-0000-0000-8E40-00608CF305B2}' BaseID='{F7290A45-E3AD-11D2-AE4F-006008C9F5A9}' PatternFlags='0' Hidden='0' MasterType='541'><PageSheet LineStyle='0' FillStyle='0' TextStyle='0'><Cell N='PageWidth' V='3.937007874015748'/><Cell N='PageHeight' V='3.937007874015748'/><Cell N='ShdwOffsetX' V='0.1181102362204724'/><Cell N='ShdwOffsetY' V='-0.1181102362204724'/><Cell N='PageScale' V='0.03937007874015748' U='MM'/><Cell N='DrawingScale' V='0.03937007874015748' U='MM'/><Cell N='DrawingSizeType' V='4'/><Cell N='DrawingScaleType' V='0'/><Cell N='InhibitSnap' V='0'/><Cell N='PageLockReplace' V='0' U='BOOL'/><Cell N='PageLockDuplicate' V='0' U='BOOL'/><Cell N='UIVisibility' V='0'/><Cell N='ShdwType' V='0'/><Cell N='ShdwObliqueAngle' V='0'/><Cell N='ShdwScaleFactor' V='1'/><Cell N='DrawingResizeType' V='0'/><Section N='Layer'><Row IX='0'><Cell N='Name' V='连接线'/><Cell N='Color' V='255'/><Cell N='Status' V='0'/><Cell N='Visible' V='1'/><Cell N='Print' V='1'/><Cell N='Active' V='0'/><Cell N='Lock' V='0'/><Cell N='Snap' V='1'/><Cell N='Glue' V='1'/><Cell N='NameUniv' V='Connector'/><Cell N='ColorTrans' V='0'/></Row></Section></PageSheet><Icon>
AAABAAEAICAQFgAAAADoAgAAFgAAACgAAAAgAAAAQAAAAAEABAAAAAAAgAIAAAAAAAAAAAAAAAAAA
AAAAAAAAAAAAACAAACAAAAAgIAAgAAAAIAAgACAgAAAgICAAMDAwAAAAP8AAP8AAAD//wD/AAAA/w
D/AP//AAD///8AAAAAAAAAAAAAAAAAAAAAAAAAAAAAAAAAAAAAAAAAAAAAAAAAAAAAAAAAAAAAAAA
AAAAAAAeHh4eAAAAAAAAAAAAAAAAIAAAAcAAAAAAAAAAAAAADNzMzAIAAAAAAAAAAAAAAAAAAAwBw
AAAAAAAAAAAAAw///wMAgAAAAAAAAAAAAHgP//8IeHh4eHh4eHAAAACAD/n/AwCAAAAAAACAAAAAc
ACZkAAAcAAAAAAAcAAAAIAACTAAAIAAAAAAAIAAAABwAAAAAABwAAAAAABwAAAAgAAAMAAAgAAAAA
AAgAAAAHAAADMzM3MzMzMAAHAAAACAAAAAAAAAAAADAACAAAAAcAAAAAAAcAAAAwAAcAAAAIAAAAA
AAIAAAAMAAIAAAABwAAAAAABwAAADAABwAAAAgAAAAAAAgAAAAwAAgAAAAHAAAAAAAHAAM5MzMHAA
AACAAAAAAACAAAmZADCAAAAAcAAAAAAAcAD/n/AwcAAAAIeHh4eHh4eA///wh4AAAAAAAAAAAABwA
P//8DAAAAAAAAAAAAAAgAAAAAAAAAAAAAAAAAAAAHAAAHAAAAAAAAAAAAAAAACAAACAAAAAAAAAAA
AAAAAAeHh4cAAAAAAAAAAAAAAAAAAAAAAAAAAAAAAAAAAAAAAAAAAAAAAAAAAAAAAAAAAAAAAAAAA
AAAD/////////////////gH///79///4Df//8A3//+AN///AAAAf0A3/39Ad/9/eff/f3H3/3959/
9/eAAPf3gAD39/989/f/fPf3/3z39/989/f/cBf3/2AX9/9gF/AAAAf//2Af//9gP///ff///33//
/8B/////////////////w==</Icon><Rel r:id='rId3'/></Master><Master ID='6' NameU='Rounded Rectangle' IsCustomNameU='1' Name='圆角矩形' IsCustomName='1' Prompt='拖到绘图页上，然后使用黄色方形修改形状。' IconSize='1' AlignName='2' MatchByName='0' IconUpdate='1' UniqueID='{08843001-001C-0000-8E40-00608CF305B2}' BaseID='{AFF00793-3181-49B8-85EB-B927470BDD0A}' PatternFlags='0' Hidden='0' MasterType='2'><PageSheet LineStyle='0' FillStyle='0' TextStyle='0'><Cell N='PageWidth' V='3.937007874015748' U='MM'/><Cell N='PageHeight' V='3.937007874015748' U='MM'/><Cell N='ShdwOffsetX' V='0.1181102362204724'/><Cell N='ShdwOffsetY' V='-0.1181102362204724'/><Cell N='PageScale' V='0.03937007874015748' U='MM'/><Cell N='DrawingScale' V='0.03937007874015748' U='MM'/><Cell N='DrawingSizeType' V='0'/><Cell N='DrawingScaleType' V='0'/><Cell N='InhibitSnap' V='0'/><Cell N='PageLockReplace' V='0' U='BOOL'/><Cell N='PageLockDuplicate' V='0' U='BOOL'/><Cell N='UIVisibility' V='0'/><Cell N='ShdwType' V='0'/><Cell N='ShdwObliqueAngle' V='0'/><Cell N='ShdwScaleFactor' V='1'/><Cell N='DrawingResizeType' V='1'/><Cell N='ShapeKeywords' V='两个,侧面,双,剪切,圆形,曲线,统一'/></PageSheet><Icon>
AAABAAEAICAQFgAAAADoAgAAFgAAACgAAAAgAAAAQAAAAAEABAAAAAAAgAIAAAAAAAAAAAAAAAAAA
AAAAAAAAAAAAACAAACAAAAAgIAAgAAAAIAAgACAgAAAgICAAMDAwAAAAP8AAP8AAAD//wD/AAAA/w
D/AP//AAD///8AAAAAAAAAAAAAAAAAAAAAAAAAAAAAAAAAAAAAAAAAAAAAAAAAAAAAAAAAAAAAAAA
AAAAAAAAAAAAAAAAAAAAAAAAAAAAAAAAAAAAAAAAAAAAACIiIiIiIiIiIiIiIiIcAAP//////////
////////AAD//////////////////3AA//////////////////9wAP//////////////////cAD//
////////////////3AA//////////////////9wAP//////////////////cAD///////////////
///3AA//////////////////9wAP//////////////////cAD//////////////////3AA///////
///////////9wAP//////////////////cAD//////////////////3AA//////////////////9w
AP//////////////////cAD//////////////////3AA//////////////////9wAP///////////
///////cAD//////////////////wAAB3d3d3d3d3d3d3d3d3AAAAAAAAAAAAAAAAAAAAAAAAAAAA
AAAAAAAAAAAAAAAAAAAAAAAAAAAAAAAAAAAAAAAAAAAAAAAAAAAAAAAAAAAAAAAAAAAAAAAAAAAAA
AAAD/////////////////////4AAAB+AAAAOAAAABwAAAAcAAAAHAAAABwAAAAcAAAAHAAAABwAAA
AcAAAAHAAAABwAAAAcAAAAHAAAABwAAAAcAAAAHAAAABwAAAAcAAAAGAAAABgAAAAcAAAAP//////
////////////////////w==</Icon><Rel r:id='rId4'/></Master><Master ID='9' NameU='Circle' IsCustomNameU='1' Name='圆形' IsCustomName='1' Prompt='拖到绘图页上。' IconSize='1' AlignName='2' MatchByName='0' IconUpdate='1' UniqueID='{08840D74-0006-0000-8E40-00608CF305B2}' BaseID='{DA0BFBDB-EA69-4458-86EF-90D5D718690C}' PatternFlags='0' Hidden='0' MasterType='2'><PageSheet LineStyle='0' FillStyle='0' TextStyle='0'><Cell N='PageWidth' V='3.937007874015748' U='MM'/><Cell N='PageHeight' V='3.937007874015748' U='MM'/><Cell N='ShdwOffsetX' V='0.1181102362204724'/><Cell N='ShdwOffsetY' V='-0.1181102362204724'/><Cell N='PageScale' V='0.03937007874015748' U='MM'/><Cell N='DrawingScale' V='0.03937007874015748' U='MM'/><Cell N='DrawingSizeType' V='0'/><Cell N='DrawingScaleType' V='0'/><Cell N='InhibitSnap' V='0'/><Cell N='PageLockReplace' V='0' U='BOOL'/><Cell N='PageLockDuplicate' V='0' U='BOOL'/><Cell N='UIVisibility' V='0'/><Cell N='ShdwType' V='0'/><Cell N='ShdwObliqueAngle' V='0'/><Cell N='ShdwScaleFactor' V='1'/><Cell N='DrawingResizeType' V='1'/><Cell N='ShapeKeywords' V='基本,形状,几何图形,圆形,圆形'/></PageSheet><Icon>
AAABAAEAICAQFgAAAADoAgAAFgAAACgAAAAgAAAAQAAAAAEABAAAAAAAgAIAAAAAAAAAAAAAAAAAA
AAAAAAAAAAAAACAAACAAAAAgIAAgAAAAIAAgACAgAAAgICAAMDAwAAAAP8AAP8AAAD//wD/AAAA/w
D/AP//AAD///8AAAAAAAAAAAAAAAAAAAAAAAAAAAAAAAB3dwAAAAAAAAAAAAAAAHj/////+AAAAAA
AAAAAAH/////////wAAAAAAAAAAj///////////AAAAAAAAD/////////////AAAAAAAP////////
//////AAAAAAj///////////////AAAAAP///////////////4AAAA/////////////////wAAAP/
///////////////9wAAj/////////////////gAAP//////////////////AAD///////////////
///wAA//////////////////9wAP//////////////////cAD//////////////////3AA///////
///////////8AAP//////////////////AAD//////////////////wAAj/////////////////gA
AA/////////////////3AAAI////////////////8AAAAP///////////////3AAAACP/////////
/////gAAAAACP////////////+AAAAAAACP///////////4AAAAAAAACP//////////gAAAAAAAAA
AI////////gAAAAAAAAAAAAAeP////cAAAAAAAAAAAAAAAAAAAAAAAAAAAAAAAAAAAAAAAAAAAAAA
AAAD//////+Qn//+AAf/+AAF//AAAP/gAAD/wAAAP4AAAB/AAAAfAAAAD4AAAA8AAAAGAAAABgAAA
A4AAAAHAAAABwAAAAYAAAAOAAAABgAAAAcAAAAHAAAADwAAAA+AAAAfwAAAH8AAAD/gAAB/8AAA//
wAA//+AAf//8A///////w==</Icon><Rel r:id='rId5'/></Master></Masters>
