# Supplementary material for: Video captioning based on vision transformer and reinforcement learning
Source: PeerJ Comput Sci. 2022 Mar 16;8:e916. doi: 10.7717/peerj-cs.916 (PMC9044334; doi:10.7717/peerj-cs.916)
Supplement: Supplemental Information 3 — Specifically, the encoding block first inputs the features into Layer Norm and Multi-Head Attention, and then sends them to the MLP block. [file peerj-cs-08-916-s003.vsdx › visio/pages/_rels/page1.xml.rels]

<?xml version="1.0" encoding="UTF-8" standalone="yes"?>
<Relationships xmlns="http://schemas.openxmlformats.org/package/2006/relationships"><Relationship Id="rId3" Type="http://schemas.microsoft.com/visio/2010/relationships/master" Target="../masters/master5.xml"/><Relationship Id="rId2" Type="http://schemas.microsoft.com/visio/2010/relationships/master" Target="../masters/master3.xml"/><Relationship Id="rId1" Type="http://schemas.microsoft.com/visio/2010/relationships/master" Target="../masters/master2.xml"/></Relationships>
