# Supplementary material for: Video captioning based on vision transformer and reinforcement learning
Source: PeerJ Comput Sci. 2022 Mar 16;8:e916. doi: 10.7717/peerj-cs.916 (PMC9044334; doi:10.7717/peerj-cs.916)
Supplement: Supplemental Information 3 — Specifically, the encoding block first inputs the features into Layer Norm and Multi-Head Attention, and then sends them to the MLP block. [file peerj-cs-08-916-s003.vsdx › visio/pages/page1.xml]

<?xml version='1.0' encoding='utf-8' ?>
<PageContents xmlns='http://schemas.microsoft.com/office/visio/2012/main' xmlns:r='http://schemas.openxmlformats.org/officeDocument/2006/relationships' xml:space='preserve'><Shapes><Shape ID='147' NameU='Rectangle' Name='矩形' Type='Shape' Master='4'><Cell N='PinX' V='5.293311437220868'/><Cell N='PinY' V='5.709423762167477'/><Cell N='Height' V='0.2952755905511815'/><Cell N='LocPinY' V='0.1476377952755907' F='Inh'/><Cell N='Angle' V='-1.576032314550883'/><Cell N='ObjType' V='1'/><Cell N='FillForegnd' V='#b7dde8' F='THEMEGUARD(MSOTINT(THEMEVAL("AccentColor4"),60))'/><Cell N='FillBkgnd' V='#cae6ee' F='THEMEGUARD(SHADE(FillForegnd,LUMDIFF(THEMEVAL("FillColor"),THEMEVAL("FillColor2"))))'/><Cell N='ShapeShdwShow' V='2'/><Cell N='FillGradientEnabled' V='0'/><Section N='Connection'><Row T='Connection' IX='1'><Cell N='Y' V='0.1476377952755907' F='Inh'/></Row><Row T='Connection' IX='2'><Cell N='Y' V='0.2952755905511815' F='Inh'/></Row><Row T='Connection' IX='3'><Cell N='Y' V='0.1476377952755907' F='Inh'/></Row><Row T='Connection' IX='4'><Cell N='Y' V='0.1476377952755907' F='Inh'/></Row></Section><Section N='Character'><Row IX='0'><Cell N='Font' V='Times New Roman'/><Cell N='ComplexScriptFont' V='Times New Roman'/></Row></Section><Section N='Geometry' IX='0'><Row T='LineTo' IX='3'><Cell N='Y' V='0.2952755905511815' F='Inh'/></Row><Row T='LineTo' IX='4'><Cell N='Y' V='0.2952755905511815' F='Inh'/></Row></Section><Text><cp IX='0'/>Dropout/Drop Path
</Text></Shape><Shape ID='148' NameU='Rectangle.148' Name='矩形.148' Type='Shape' Master='4'><Cell N='PinX' V='4.751980275079052'/><Cell N='PinY' V='5.711338109734769'/><Cell N='Height' V='0.2952755905511815'/><Cell N='LocPinY' V='0.1476377952755907' F='Inh'/><Cell N='Angle' V='-1.576032314550883'/><Cell N='ObjType' V='1'/><Cell N='FillForegnd' V='#d7e3bf' F='THEMEGUARD(MSOTINT(THEMEVAL("AccentColor2"),60))'/><Cell N='FillBkgnd' V='#e2ebd1' F='THEMEGUARD(SHADE(FillForegnd,LUMDIFF(THEMEVAL("FillColor"),THEMEVAL("FillColor2"))))'/><Cell N='ShapeShdwShow' V='2'/><Cell N='FillGradientEnabled' V='0'/><Section N='Connection'><Row T='Connection' IX='1'><Cell N='Y' V='0.1476377952755907' F='Inh'/></Row><Row T='Connection' IX='2'><Cell N='Y' V='0.2952755905511815' F='Inh'/></Row><Row T='Connection' IX='3'><Cell N='Y' V='0.1476377952755907' F='Inh'/></Row><Row T='Connection' IX='4'><Cell N='Y' V='0.1476377952755907' F='Inh'/></Row></Section><Section N='Character'><Row IX='0'><Cell N='Font' V='Times New Roman'/><Cell N='ComplexScriptFont' V='Times New Roman'/></Row></Section><Section N='Geometry' IX='0'><Row T='LineTo' IX='3'><Cell N='Y' V='0.2952755905511815' F='Inh'/></Row><Row T='LineTo' IX='4'><Cell N='Y' V='0.2952755905511815' F='Inh'/></Row></Section><Text><cp IX='0'/>MLP Block
</Text></Shape><Shape ID='149' NameU='Rectangle.149' Name='矩形.149' Type='Shape' Master='4'><Cell N='PinX' V='4.210649112937236'/><Cell N='PinY' V='5.714172538974221'/><Cell N='Height' V='0.2952755905511815'/><Cell N='LocPinY' V='0.1476377952755907' F='Inh'/><Cell N='Angle' V='-1.576032314550883'/><Cell N='ObjType' V='1'/><Cell N='FillForegnd' V='#fff2cc' F='THEMEGUARD(MSOTINT(THEMEVAL("AccentColor6"),80))'/><Cell N='FillBkgnd' V='#fff5d9' F='THEMEGUARD(SHADE(FillForegnd,LUMDIFF(THEMEVAL("FillColor"),THEMEVAL("FillColor2"))))'/><Cell N='ShapeShdwShow' V='2'/><Cell N='FillGradientEnabled' V='0'/><Section N='Connection'><Row T='Connection' IX='1'><Cell N='Y' V='0.1476377952755907' F='Inh'/></Row><Row T='Connection' IX='2'><Cell N='Y' V='0.2952755905511815' F='Inh'/></Row><Row T='Connection' IX='3'><Cell N='Y' V='0.1476377952755907' F='Inh'/></Row><Row T='Connection' IX='4'><Cell N='Y' V='0.1476377952755907' F='Inh'/></Row></Section><Section N='Character'><Row IX='0'><Cell N='Font' V='Times New Roman'/><Cell N='ComplexScriptFont' V='Times New Roman'/></Row></Section><Section N='Geometry' IX='0'><Row T='LineTo' IX='3'><Cell N='Y' V='0.2952755905511815' F='Inh'/></Row><Row T='LineTo' IX='4'><Cell N='Y' V='0.2952755905511815' F='Inh'/></Row></Section><Text><cp IX='0'/>Layer Norm
</Text></Shape><Shape ID='151' NameU='Rectangle.151' Name='矩形.151' Type='Shape' Master='4'><Cell N='PinX' V='3.226410636315752'/><Cell N='PinY' V='5.714989632212385'/><Cell N='Height' V='0.2952755905511815'/><Cell N='LocPinY' V='0.1476377952755907' F='Inh'/><Cell N='Angle' V='-1.576032314550883'/><Cell N='ObjType' V='1'/><Cell N='FillForegnd' V='#b7dde8' F='THEMEGUARD(MSOTINT(THEMEVAL("AccentColor4"),60))'/><Cell N='FillBkgnd' V='#cae6ee' F='THEMEGUARD(SHADE(FillForegnd,LUMDIFF(THEMEVAL("FillColor"),THEMEVAL("FillColor2"))))'/><Cell N='ShapeShdwShow' V='2'/><Cell N='FillGradientEnabled' V='0'/><Cell N='SketchEnabled' V='0'/><Section N='Connection'><Row T='Connection' IX='1'><Cell N='Y' V='0.1476377952755907' F='Inh'/></Row><Row T='Connection' IX='2'><Cell N='Y' V='0.2952755905511815' F='Inh'/></Row><Row T='Connection' IX='3'><Cell N='Y' V='0.1476377952755907' F='Inh'/></Row><Row T='Connection' IX='4'><Cell N='Y' V='0.1476377952755907' F='Inh'/></Row></Section><Section N='Character'><Row IX='0'><Cell N='Font' V='Times New Roman'/><Cell N='Color' V='0'/><Cell N='Style' V='0'/><Cell N='AsianFont' V='SimSun'/><Cell N='ComplexScriptFont' V='Times New Roman'/></Row></Section><Section N='Geometry' IX='0'><Row T='LineTo' IX='3'><Cell N='Y' V='0.2952755905511815' F='Inh'/></Row><Row T='LineTo' IX='4'><Cell N='Y' V='0.2952755905511815' F='Inh'/></Row></Section><Text><cp IX='0'/>Dropout/Drop Path
</Text></Shape><Shape ID='152' NameU='Rectangle.152' Name='矩形.152' Type='Shape' Master='4'><Cell N='PinX' V='2.685079474173936'/><Cell N='PinY' V='5.715199389535824'/><Cell N='Height' V='0.2952755905511815'/><Cell N='LocPinY' V='0.1476377952755907' F='Inh'/><Cell N='Angle' V='-1.576032314550883'/><Cell N='ObjType' V='1'/><Cell N='FillForegnd' V='#f9c499' F='THEMEGUARD(MSOTINT(THEMEVAL("AccentColor5"),40))'/><Cell N='FillBkgnd' V='#fbd5b5' F='THEMEGUARD(SHADE(FillForegnd,LUMDIFF(THEMEVAL("FillColor"),THEMEVAL("FillColor2"))))'/><Cell N='ShapeShdwShow' V='2'/><Cell N='FillGradientEnabled' V='0'/><Section N='Connection'><Row T='Connection' IX='1'><Cell N='Y' V='0.1476377952755907' F='Inh'/></Row><Row T='Connection' IX='2'><Cell N='Y' V='0.2952755905511815' F='Inh'/></Row><Row T='Connection' IX='3'><Cell N='Y' V='0.1476377952755907' F='Inh'/></Row><Row T='Connection' IX='4'><Cell N='Y' V='0.1476377952755907' F='Inh'/></Row></Section><Section N='Character'><Row IX='0'><Cell N='Font' V='Times New Roman'/><Cell N='ComplexScriptFont' V='Times New Roman'/></Row></Section><Section N='Geometry' IX='0'><Row T='LineTo' IX='3'><Cell N='Y' V='0.2952755905511815' F='Inh'/></Row><Row T='LineTo' IX='4'><Cell N='Y' V='0.2952755905511815' F='Inh'/></Row></Section><Text><cp IX='0'/>Multi-Head Attention
</Text></Shape><Shape ID='153' NameU='Rectangle.153' Name='矩形.153' Type='Shape' Master='4'><Cell N='PinX' V='2.143748312032122'/><Cell N='PinY' V='5.715409146859265'/><Cell N='Height' V='0.2952755905511815'/><Cell N='LocPinY' V='0.1476377952755907' F='Inh'/><Cell N='Angle' V='-1.576032314550883'/><Cell N='ObjType' V='1'/><Cell N='FillForegnd' V='#fff2cc' F='THEMEGUARD(MSOTINT(THEMEVAL("AccentColor6"),80))'/><Cell N='FillBkgnd' V='#fff5d9' F='THEMEGUARD(SHADE(FillForegnd,LUMDIFF(THEMEVAL("FillColor"),THEMEVAL("FillColor2"))))'/><Cell N='ShapeShdwShow' V='2'/><Cell N='FillGradientEnabled' V='0'/><Cell N='SketchEnabled' V='0'/><Section N='Connection'><Row T='Connection' IX='1'><Cell N='Y' V='0.1476377952755907' F='Inh'/></Row><Row T='Connection' IX='2'><Cell N='Y' V='0.2952755905511815' F='Inh'/></Row><Row T='Connection' IX='3'><Cell N='Y' V='0.1476377952755907' F='Inh'/></Row><Row T='Connection' IX='4'><Cell N='Y' V='0.1476377952755907' F='Inh'/></Row></Section><Section N='Character'><Row IX='0'><Cell N='Font' V='Times New Roman'/><Cell N='Color' V='0'/><Cell N='Style' V='0'/><Cell N='AsianFont' V='SimSun'/><Cell N='ComplexScriptFont' V='Times New Roman'/></Row></Section><Section N='Geometry' IX='0'><Row T='LineTo' IX='3'><Cell N='Y' V='0.2952755905511815' F='Inh'/></Row><Row T='LineTo' IX='4'><Cell N='Y' V='0.2952755905511815' F='Inh'/></Row></Section><Text><cp IX='0'/>Layer Norm
</Text></Shape><Shape ID='154' NameU='Dynamic connector' Name='动态连接线' Type='Shape' Master='5'><Cell N='PinX' V='5.022645856149961' U='MM' F='Inh'/><Cell N='PinY' V='5.710380935951123' U='MM' F='Inh'/><Cell N='Width' V='0.2460596191553703' U='MM' F='GUARD(EndX-BeginX)'/><Cell N='Height' V='-0.1968503937007874' F='GUARD(-0.19685039370079DL)'/><Cell N='LocPinX' V='0.1230298095776856' U='MM' F='Inh'/><Cell N='LocPinY' V='-0.09842519685039369' F='Inh'/><Cell N='BeginX' V='4.899616046572275' U='MM' F='PAR(PNT(Sheet.148!Connections.X3,Sheet.148!Connections.Y3))'/><Cell N='BeginY' V='5.710565083578555' F='PAR(PNT(Sheet.148!Connections.X3,Sheet.148!Connections.Y3))'/><Cell N='EndX' V='5.145675665727645' U='MM' F='PAR(PNT(Sheet.147!Connections.X1,Sheet.147!Connections.Y1))'/><Cell N='EndY' V='5.710196788323691' U='MM' F='PAR(PNT(Sheet.147!Connections.X1,Sheet.147!Connections.Y1))'/><Cell N='LayerMember' V='0'/><Cell N='BegTrigger' V='2' F='_XFTRIGGER(Sheet.148!EventXFMod)'/><Cell N='EndTrigger' V='2' F='_XFTRIGGER(Sheet.147!EventXFMod)'/><Cell N='TxtPinX' V='0.1228456619502536' F='Inh'/><Cell N='TxtPinY' V='-0.0986093444778251' F='Inh'/><Cell N='ShapeShdwShow' V='2'/><Section N='Control'><Row N='TextPosition'><Cell N='X' V='0.1228456619502536'/><Cell N='Y' V='-0.09860934447782555'/><Cell N='XDyn' V='0.1228456619502536' F='Inh'/><Cell N='YDyn' V='-0.0986093444778251' F='Inh'/></Row></Section><Section N='Character'><Row IX='0'><Cell N='Font' V='Times New Roman'/><Cell N='ComplexScriptFont' V='Times New Roman'/></Row></Section><Section N='Geometry' IX='0'><Row T='MoveTo' IX='1'><Cell N='Y' V='-0.09824104922296151'/></Row><Row T='LineTo' IX='2'><Cell N='X' V='0.07794170380426024'/><Cell N='Y' V='-0.09824104922296151'/></Row><Row T='LineTo' IX='3'><Cell N='X' V='0.07794170380426024'/><Cell N='Y' V='-0.09860934447782555'/></Row><Row T='LineTo' IX='4'><Cell N='X' V='0.2460596191553712'/><Cell N='Y' V='-0.09860934447782555'/></Row></Section></Shape><Shape ID='155' Type='Shape' Master='5'><Cell N='PinX' V='4.481314694008145' U='MM' F='Inh'/><Cell N='PinY' V='5.712755324354495' U='MM' F='Inh'/><Cell N='Width' V='0.2460596191553703' U='MM' F='GUARD(EndX-BeginX)'/><Cell N='Height' V='-0.1968503937007874' F='GUARD(-0.19685039370079DL)'/><Cell N='LocPinX' V='0.1230298095776852' U='MM' F='Inh'/><Cell N='LocPinY' V='-0.09842519685039369' F='Inh'/><Cell N='BeginX' V='4.358284884430459' U='MM' F='PAR(PNT(Sheet.149!Connections.X3,Sheet.149!Connections.Y3))'/><Cell N='BeginY' V='5.713399512818008' F='PAR(PNT(Sheet.149!Connections.X3,Sheet.149!Connections.Y3))'/><Cell N='EndX' V='4.604344503585829' U='MM' F='PAR(PNT(Sheet.148!Connections.X1,Sheet.148!Connections.Y1))'/><Cell N='EndY' V='5.712111135890983' U='MM' F='PAR(PNT(Sheet.148!Connections.X1,Sheet.148!Connections.Y1))'/><Cell N='LayerMember' V='0'/><Cell N='BegTrigger' V='2' F='_XFTRIGGER(Sheet.149!EventXFMod)'/><Cell N='EndTrigger' V='2' F='_XFTRIGGER(Sheet.148!EventXFMod)'/><Cell N='TxtPinX' V='0.1223856211141729' F='Inh'/><Cell N='TxtPinY' V='-0.09906938531390575' F='Inh'/><Cell N='ShapeShdwShow' V='2'/><Section N='Control'><Row N='TextPosition'><Cell N='X' V='0.1223856211141729'/><Cell N='Y' V='-0.09906938531390619'/><Cell N='XDyn' V='0.1223856211141729' F='Inh'/><Cell N='YDyn' V='-0.09906938531390575' F='Inh'/></Row></Section><Section N='Character'><Row IX='0'><Cell N='Font' V='Times New Roman'/><Cell N='ComplexScriptFont' V='Times New Roman'/></Row></Section><Section N='Geometry' IX='0'><Row T='MoveTo' IX='1'><Cell N='Y' V='-0.09778100838688175'/></Row><Row T='LineTo' IX='2'><Cell N='X' V='0.07794170380425936'/><Cell N='Y' V='-0.09778100838688175'/></Row><Row T='LineTo' IX='3'><Cell N='X' V='0.07794170380425936'/><Cell N='Y' V='-0.09906938531390619'/></Row><Row T='LineTo' IX='4'><Cell N='X' V='0.2460596191553703'/><Cell N='Y' V='-0.09906938531390619'/></Row></Section></Shape><Shape ID='157' Type='Shape' Master='5'><Cell N='PinX' V='2.955745055244845' U='MM' F='Inh'/><Cell N='PinY' V='5.715094510874105' F='Inh'/><Cell N='Width' V='0.2460596191553708' U='MM' F='GUARD(EndX-BeginX)'/><Cell N='Height' V='0.1968503937007874' F='GUARD(0.19685039370079DL)'/><Cell N='LocPinX' V='0.1230298095776854' U='MM' F='Inh'/><Cell N='LocPinY' V='0.09842519685039369' F='Inh'/><Cell N='BeginX' V='2.832715245667159' U='MM' F='PAR(PNT(Sheet.152!Connections.X3,Sheet.152!Connections.Y3))'/><Cell N='BeginY' V='5.71442636337961' F='PAR(PNT(Sheet.152!Connections.X3,Sheet.152!Connections.Y3))'/><Cell N='EndX' V='3.07877486482253' F='_WALKGLUE(EndTrigger,BegTrigger,WalkPreference)'/><Cell N='EndY' V='5.715762658368599' F='_WALKGLUE(EndTrigger,BegTrigger,WalkPreference)'/><Cell N='LayerMember' V='0'/><Cell N='BegTrigger' V='2' F='_XFTRIGGER(Sheet.152!EventXFMod)'/><Cell N='EndTrigger' V='2' F='_XFTRIGGER(Sheet.151!EventXFMod)'/><Cell N='TxtPinX' V='0.1223616620831913' F='Inh'/><Cell N='TxtPinY' V='0.09909334434488759' F='Inh'/><Cell N='ShapeShdwShow' V='2'/><Section N='Control'><Row N='TextPosition'><Cell N='X' V='0.1223616620831911'/><Cell N='Y' V='0.09909334434488759'/><Cell N='XDyn' V='0.1223616620831913' F='Inh'/><Cell N='YDyn' V='0.09909334434488759' F='Inh'/></Row></Section><Section N='Character'><Row IX='0'><Cell N='Font' V='Times New Roman'/><Cell N='ComplexScriptFont' V='Times New Roman'/></Row></Section><Section N='Geometry' IX='0'><Row T='MoveTo' IX='1'><Cell N='Y' V='0.09775704935589946'/></Row><Row T='LineTo' IX='2'><Cell N='X' V='0.07794170380425891'/><Cell N='Y' V='0.09775704935589946'/></Row><Row T='LineTo' IX='3'><Cell N='X' V='0.07794170380425891'/><Cell N='Y' V='0.09909334434488759'/></Row><Row T='LineTo' IX='4'><Cell N='X' V='0.2460596191553703'/><Cell N='Y' V='0.09909334434488759'/></Row></Section></Shape><Shape ID='158' Type='Shape' Master='5'><Cell N='PinX' V='2.414413893103029' U='MM' F='Inh'/><Cell N='PinY' V='5.715304268197545' U='MM' F='Inh'/><Cell N='Width' V='0.2460596191553695' U='MM' F='GUARD(EndX-BeginX)'/><Cell N='Height' V='0.1968503937007874' F='GUARD(0.19685039370079DL)'/><Cell N='LocPinX' V='0.1230298095776847' U='MM' F='Inh'/><Cell N='LocPinY' V='0.09842519685039369' F='Inh'/><Cell N='BeginX' V='2.291384083525344' U='MM' F='PAR(PNT(Sheet.153!Connections.X3,Sheet.153!Connections.Y3))'/><Cell N='BeginY' V='5.714636120703052' F='PAR(PNT(Sheet.153!Connections.X3,Sheet.153!Connections.Y3))'/><Cell N='EndX' V='2.537443702680714' U='MM' F='PAR(PNT(Sheet.152!Connections.X1,Sheet.152!Connections.Y1))'/><Cell N='EndY' V='5.715972415692038' U='MM' F='PAR(PNT(Sheet.152!Connections.X1,Sheet.152!Connections.Y1))'/><Cell N='LayerMember' V='0'/><Cell N='BegTrigger' V='2' F='_XFTRIGGER(Sheet.153!EventXFMod)'/><Cell N='EndTrigger' V='2' F='_XFTRIGGER(Sheet.152!EventXFMod)'/><Cell N='TxtPinX' V='0.1223616620831916' F='Inh'/><Cell N='TxtPinY' V='0.09909334434488715' F='Inh'/><Cell N='ShapeShdwShow' V='2'/><Section N='Control'><Row N='TextPosition'><Cell N='X' V='0.1223616620831914'/><Cell N='Y' V='0.09909334434488759'/><Cell N='XDyn' V='0.1223616620831916' F='Inh'/><Cell N='YDyn' V='0.09909334434488715' F='Inh'/></Row></Section><Section N='Character'><Row IX='0'><Cell N='Font' V='Times New Roman'/><Cell N='ComplexScriptFont' V='Times New Roman'/></Row></Section><Section N='Geometry' IX='0'><Row T='MoveTo' IX='1'><Cell N='Y' V='0.09775704935590035'/></Row><Row T='LineTo' IX='2'><Cell N='X' V='0.0779417038042598'/><Cell N='Y' V='0.09775704935590035'/></Row><Row T='LineTo' IX='3'><Cell N='X' V='0.0779417038042598'/><Cell N='Y' V='0.09909334434488759'/></Row><Row T='LineTo' IX='4'><Cell N='X' V='0.2460596191553699'/><Cell N='Y' V='0.09909334434488759'/></Row></Section></Shape><Shape ID='159' Type='Shape' Master='5'><Cell N='PinX' V='1.870107191366488' U='MM' F='Inh'/><Cell N='PinY' V='5.716419775320479' U='MM' F='Inh'/><Cell N='Width' V='0.2520106983448207' U='MM' F='GUARD(EndX-BeginX)'/><Cell N='Height' V='-0.1968503937007874' F='GUARD(-0.19685039370079DL)'/><Cell N='LocPinX' V='0.1260053491724104' U='MM' F='Inh'/><Cell N='LocPinY' V='-0.09842519685039369' F='Inh'/><Cell N='BeginX' V='1.744101842194078'/><Cell N='BeginY' V='5.716657377625479'/><Cell N='EndX' V='1.996112540538899' U='MM' F='PAR(PNT(Sheet.153!Connections.X1,Sheet.153!Connections.Y1))'/><Cell N='EndY' V='5.716182173015479' U='MM' F='PAR(PNT(Sheet.153!Connections.X1,Sheet.153!Connections.Y1))'/><Cell N='LayerMember' V='0'/><Cell N='BegTrigger' V='1' F='_XFTRIGGER(EventXFMod)'/><Cell N='EndTrigger' V='2' F='_XFTRIGGER(Sheet.153!EventXFMod)'/><Cell N='ConFixedCode' V='3'/><Cell N='TxtPinX' V='0.1260053515434265' F='Inh'/><Cell N='TxtPinY' V='-0.09842519834637642' F='Inh'/><Cell N='ShapeShdwShow' V='2'/><Section N='Control'><Row N='TextPosition'><Cell N='X' V='0.1260053515434265'/><Cell N='Y' V='-0.09842519834637642'/><Cell N='XDyn' V='0.1260053515434265' F='Inh'/><Cell N='YDyn' V='-0.09842519834637642' F='Inh'/></Row></Section><Section N='Character'><Row IX='0'><Cell N='Font' V='Times New Roman'/><Cell N='ComplexScriptFont' V='Times New Roman'/></Row></Section><Section N='Geometry' IX='0'><Row T='MoveTo' IX='1'><Cell N='Y' V='-0.09818759454539361'/></Row><Row T='LineTo' IX='2'><Cell N='X' V='0.2520106983448205'/><Cell N='Y' V='-0.09866279915539344'/></Row><Row T='LineTo' IX='3' Del='1'/></Section></Shape><Shape ID='160' Type='Shape' Master='5'><Cell N='PinX' V='5.563977018291775' F='Inh'/><Cell N='PinY' V='5.704771842302018' F='Inh'/><Cell N='Width' V='0.246059619155373' F='GUARD(EndX-BeginX)'/><Cell N='Height' V='-0.1968503937007874' F='GUARD(-0.19685039370079DL)'/><Cell N='LocPinX' V='0.1230298095776856' F='Inh'/><Cell N='LocPinY' V='-0.09842519685039369' F='Inh'/><Cell N='BeginX' V='5.440947208714088'/><Cell N='BeginY' V='5.70587607160161'/><Cell N='EndX' V='5.687006827869461'/><Cell N='EndY' V='5.703667613002427'/><Cell N='LayerMember' V='0'/><Cell N='BegTrigger' V='1' F='_XFTRIGGER(EventXFMod)'/><Cell N='EndTrigger' V='1' F='_XFTRIGGER(EventXFMod)'/><Cell N='TxtPinX' V='0.1219255802780946' F='Inh'/><Cell N='TxtPinY' V='-0.09952942614998461' F='Inh'/><Cell N='ShapeShdwShow' V='2'/><Section N='Control'><Row N='TextPosition'><Cell N='X' V='0.1219255802780946'/><Cell N='Y' V='-0.09952942614998504'/><Cell N='XDyn' V='0.1219255802780946' F='Inh'/><Cell N='YDyn' V='-0.09952942614998461' F='Inh'/></Row></Section><Section N='Character'><Row IX='0'><Cell N='Font' V='Times New Roman'/><Cell N='ComplexScriptFont' V='Times New Roman'/></Row></Section><Section N='Geometry' IX='0'><Row T='MoveTo' IX='1'><Cell N='Y' V='-0.097320967550802'/></Row><Row T='LineTo' IX='2'><Cell N='Y' V='-0.09952942614998506'/></Row><Row T='LineTo' IX='3'><Cell N='X' V='0.246059619155373'/><Cell N='Y' V='-0.09952942614998506'/></Row></Section></Shape><Shape ID='166' Type='Group' LineStyle='8' FillStyle='8' TextStyle='8'><Cell N='PinX' V='3.692939674234333'/><Cell N='PinY' V='5.715171541474758'/><Cell N='Width' V='0.2440944881889746'/><Cell N='Height' V='0.2440944881889746'/><Cell N='LocPinX' V='0.1220472440944873' F='Width*0.5'/><Cell N='LocPinY' V='0.1220472440944873' F='Height*0.5'/><Cell N='Angle' V='-1.576032314550883'/><Cell N='FlipX' V='0'/><Cell N='FlipY' V='0'/><Cell N='ResizeMode' V='0'/><Cell N='QuickStyleVariation' V='2'/><Cell N='ObjType' V='8'/><Cell N='FillForegnd' V='#d8d8d8' F='THEMEGUARD(MSOTINT(THEMEVAL("Light"),-15))'/><Cell N='FillBkgnd' V='#e2e2e2' F='THEMEGUARD(SHADE(FillForegnd,LUMDIFF(THEMEVAL("FillColor"),THEMEVAL("FillColor2"))))'/><Cell N='ShapeShdwShow' V='2'/><Cell N='FillGradientEnabled' V='0'/><Section N='Character'><Row IX='0'><Cell N='Font' V='Times New Roman'/><Cell N='ComplexScriptFont' V='Times New Roman'/></Row></Section><Shapes><Shape ID='161' NameU='Circle' Name='圆形' Type='Shape' Master='9'><Cell N='PinX' V='0.1220472440944869' F='Sheet.166!Width*0.5'/><Cell N='PinY' V='0.1220472440944869' F='Sheet.166!Height*0.5'/><Cell N='Width' V='0.2440944881889744' F='Sheet.166!Width*1'/><Cell N='Height' V='0.2440944881889744' F='Sheet.166!Height*1'/><Cell N='LocPinX' V='0.1220472440944872' F='Inh'/><Cell N='LocPinY' V='0.1220472440944872' F='Inh'/><Cell N='TxtPinX' V='0.1220472440944872' F='Inh'/><Cell N='TxtPinY' V='0.1220472440944872' F='Inh'/><Cell N='TxtWidth' V='0.2135826771653526' F='Inh'/><Cell N='TxtHeight' V='0.1830708661417308' F='Inh'/><Cell N='TxtLocPinX' V='0.1067913385826763' F='Inh'/><Cell N='TxtLocPinY' V='0.0915354330708654' F='Inh'/><Cell N='ObjType' V='1'/><Cell N='FillForegnd' V='#d8d8d8' F='THEMEGUARD(MSOTINT(THEMEVAL("Light"),-15))'/><Cell N='FillBkgnd' V='#e2e2e2' F='THEMEGUARD(SHADE(FillForegnd,LUMDIFF(THEMEVAL("FillColor"),THEMEVAL("FillColor2"))))'/><Cell N='FillGradientEnabled' V='0'/><Section N='Connection'><Row T='Connection' IX='0'><Cell N='X' V='0.1220472440944872' F='Inh'/><Cell N='Y' V='0.2440944881889744' F='Inh'/></Row><Row T='Connection' IX='1'><Cell N='X' V='0.1220472440944872' F='Inh'/><Cell N='Y' V='0.1220472440944872' F='Inh'/></Row><Row T='Connection' IX='2'><Cell N='Y' V='0.1220472440944872' F='Inh'/></Row><Row T='Connection' IX='3'><Cell N='X' V='0.1220472440944872' F='Inh'/></Row><Row T='Connection' IX='4'><Cell N='X' V='0.2440944881889744' F='Inh'/><Cell N='Y' V='0.1220472440944872' F='Inh'/></Row><Row T='Connection' IX='5'><Cell N='X' V='0.03573543307086585' F='Inh'/><Cell N='Y' V='0.03573543307086585' F='Inh'/></Row><Row T='Connection' IX='6'><Cell N='X' V='0.2083590551181085' F='Inh'/><Cell N='Y' V='0.03573543307086585' F='Inh'/></Row><Row T='Connection' IX='7'><Cell N='X' V='0.2083590551181085' F='Inh'/><Cell N='Y' V='0.2083590551181085' F='Inh'/></Row><Row T='Connection' IX='8'><Cell N='X' V='0.03573543307086585' F='Inh'/><Cell N='Y' V='0.2083590551181085' F='Inh'/></Row></Section><Section N='Character'><Row IX='0'><Cell N='Font' V='Times New Roman'/><Cell N='ComplexScriptFont' V='Times New Roman'/></Row></Section><Section N='Geometry' IX='0'><Row T='MoveTo' IX='1'><Cell N='Y' V='0.1220472440944872' F='Inh'/></Row><Row T='EllipticalArcTo' IX='2'><Cell N='X' V='0.2440944881889744' F='Inh'/><Cell N='Y' V='0.1220472440944872' F='Inh'/><Cell N='A' V='0.1220472440944872' U='DL' F='Inh'/><Cell N='B' V='0.2440944881889744' U='DL' F='Inh'/></Row><Row T='EllipticalArcTo' IX='3'><Cell N='Y' V='0.1220472440944872' F='Inh'/><Cell N='A' V='0.1220472440944872' U='DL' F='Inh'/></Row></Section></Shape><Shape ID='164' Type='Shape' LineStyle='8' FillStyle='8' TextStyle='8'><Cell N='PinX' V='0.1220472440944872' U='MM' F='(BeginX+EndX)/2'/><Cell N='PinY' V='0.1220472440944866' F='(BeginY+EndY)/2'/><Cell N='Width' V='0.2440944881889752' U='MM' F='SQRT((EndX-BeginX)^2+(EndY-BeginY)^2)'/><Cell N='Height' V='0'/><Cell N='LocPinX' V='0.1220472440944876' U='MM' F='Width*0.5'/><Cell N='LocPinY' V='0' F='Height*0.5'/><Cell N='Angle' V='-3.979791406821649E-16' F='ATAN2(EndY-BeginY,EndX-BeginX)'/><Cell N='FlipX' V='0'/><Cell N='FlipY' V='0'/><Cell N='ResizeMode' V='0'/><Cell N='BeginX' V='-3.855475775266434E-16' U='MM' F='PAR(PNT(Sheet.161!Connections.X3,Sheet.161!Connections.Y3))'/><Cell N='BeginY' V='0.1220472440944867' F='PAR(PNT(Sheet.161!Connections.X3,Sheet.161!Connections.Y3))'/><Cell N='EndX' V='0.2440944881889748' F='PAR(PNT(Sheet.161!Connections.X5,Sheet.161!Connections.Y5))'/><Cell N='EndY' V='0.1220472440944866' F='PAR(PNT(Sheet.161!Connections.X5,Sheet.161!Connections.Y5))'/><Cell N='TextBkgnd' V='#ffffff' F='THEMEGUARD(THEMEVAL("BackgroundColor")+1)'/><Cell N='QuickStyleLineMatrix' V='1'/><Cell N='QuickStyleFillMatrix' V='1'/><Cell N='QuickStyleEffectsMatrix' V='1'/><Cell N='QuickStyleFontMatrix' V='1'/><Cell N='FillForegnd' V='#d8d8d8' F='THEMEGUARD(MSOTINT(THEMEVAL("Light"),-15))'/><Cell N='FillBkgnd' V='#e2e2e2' F='THEMEGUARD(SHADE(FillForegnd,LUMDIFF(THEMEVAL("FillColor"),THEMEVAL("FillColor2"))))'/><Cell N='FillGradientEnabled' V='0'/><Section N='Character'><Row IX='0'><Cell N='Font' V='Times New Roman'/><Cell N='ComplexScriptFont' V='Times New Roman'/></Row></Section><Section N='Geometry' IX='0'><Cell N='NoFill' V='1'/><Cell N='NoLine' V='0'/><Cell N='NoShow' V='0'/><Cell N='NoSnap' V='0'/><Cell N='NoQuickDrag' V='0'/><Row T='MoveTo' IX='1'><Cell N='X' V='0' U='MM' F='Width*0'/><Cell N='Y' V='0'/></Row><Row T='LineTo' IX='2'><Cell N='X' V='0.2440944881889752' U='MM' F='Width*1'/><Cell N='Y' V='0'/></Row></Section></Shape><Shape ID='165' Type='Shape' LineStyle='8' FillStyle='8' TextStyle='8'><Cell N='PinX' V='0.1220472440944869' F='(BeginX+EndX)/2'/><Cell N='PinY' V='0.1220472440944866' U='MM' F='(BeginY+EndY)/2'/><Cell N='Width' V='0.2440944881889743' U='MM' F='SQRT((EndX-BeginX)^2+(EndY-BeginY)^2)'/><Cell N='Height' V='0'/><Cell N='LocPinX' V='0.1220472440944871' U='MM' F='Width*0.5'/><Cell N='LocPinY' V='0' F='Height*0.5'/><Cell N='Angle' V='-1.570796326794893' F='ATAN2(EndY-BeginY,EndX-BeginX)'/><Cell N='FlipX' V='0'/><Cell N='FlipY' V='0'/><Cell N='ResizeMode' V='0'/><Cell N='BeginX' V='0.1220472440944868' F='PAR(PNT(Sheet.161!Connections.X1,Sheet.161!Connections.Y1))'/><Cell N='BeginY' V='0.2440944881889738' F='PAR(PNT(Sheet.161!Connections.X1,Sheet.161!Connections.Y1))'/><Cell N='EndX' V='0.1220472440944876' F='PAR(PNT(Sheet.161!Connections.X4,Sheet.161!Connections.Y4))'/><Cell N='EndY' V='-4.979672317174197E-16' U='MM' F='PAR(PNT(Sheet.161!Connections.X4,Sheet.161!Connections.Y4))'/><Cell N='TextBkgnd' V='#ffffff' F='THEMEGUARD(THEMEVAL("BackgroundColor")+1)'/><Cell N='QuickStyleLineMatrix' V='1'/><Cell N='QuickStyleFillMatrix' V='1'/><Cell N='QuickStyleEffectsMatrix' V='1'/><Cell N='QuickStyleFontMatrix' V='1'/><Cell N='FillForegnd' V='#d8d8d8' F='THEMEGUARD(MSOTINT(THEMEVAL("Light"),-15))'/><Cell N='FillBkgnd' V='#e2e2e2' F='THEMEGUARD(SHADE(FillForegnd,LUMDIFF(THEMEVAL("FillColor"),THEMEVAL("FillColor2"))))'/><Cell N='FillGradientEnabled' V='0'/><Section N='Character'><Row IX='0'><Cell N='Font' V='Times New Roman'/><Cell N='ComplexScriptFont' V='Times New Roman'/></Row></Section><Section N='Geometry' IX='0'><Cell N='NoFill' V='1'/><Cell N='NoLine' V='0'/><Cell N='NoShow' V='0'/><Cell N='NoSnap' V='0'/><Cell N='NoQuickDrag' V='0'/><Row T='MoveTo' IX='1'><Cell N='X' V='0' U='MM' F='Width*0'/><Cell N='Y' V='0'/></Row><Row T='LineTo' IX='2'><Cell N='X' V='0.2440944881889743' U='MM' F='Width*1'/><Cell N='Y' V='0'/></Row></Section></Shape></Shapes></Shape><Shape ID='167' Type='Shape' Master='5'><Cell N='PinX' V='3.472470255471122' U='MM' F='Inh'/><Cell N='PinY' V='5.715013591243366' U='MM' F='Inh'/><Cell N='Width' V='0.1968503937007874' F='GUARD(0.19685039370079DL)'/><Cell N='Height' V='0.1968503937007874' F='GUARD(0.19685039370079DL)'/><Cell N='LocPinX' V='0.09842519685039369' F='Inh'/><Cell N='LocPinY' V='0.09842519685039369' F='Inh'/><Cell N='BeginX' V='3.374046407808975' U='MM' F='PAR(PNT(Sheet.151!Connections.X3,Sheet.151!Connections.Y3))'/><Cell N='BeginY' V='5.714216606056171' F='PAR(PNT(Sheet.151!Connections.X3,Sheet.151!Connections.Y3))'/><Cell N='EndX' V='3.57089410313327' F='PAR(PNT(Sheet.161!Connections.X4,Sheet.161!Connections.Y4))'/><Cell N='EndY' V='5.715810576430561' U='MM' F='PAR(PNT(Sheet.161!Connections.X4,Sheet.161!Connections.Y4))'/><Cell N='LayerMember' V='0'/><Cell N='BegTrigger' V='2' F='_XFTRIGGER(Sheet.151!EventXFMod)'/><Cell N='EndTrigger' V='2' F='_XFTRIGGER(Sheet.161!EventXFMod)'/><Cell N='TxtPinX' V='0.09762821166319613' F='Inh'/><Cell N='TxtPinY' V='0.09922218203759137' F='Inh'/><Cell N='ShapeShdwShow' V='2'/><Section N='Control'><Row N='TextPosition'><Cell N='X' V='0.09762821166319766'/><Cell N='Y' V='0.09922218203758959'/><Cell N='XDyn' V='0.09762821166319613' F='Inh'/><Cell N='YDyn' V='0.09922218203759137' F='Inh'/></Row></Section><Section N='Character'><Row IX='0'><Cell N='Font' V='Times New Roman'/><Cell N='ComplexScriptFont' V='Times New Roman'/></Row></Section><Section N='Geometry' IX='0'><Row T='MoveTo' IX='1'><Cell N='X' V='1.349188245569621E-6'/><Cell N='Y' V='0.09762821166319746'/></Row><Row T='LineTo' IX='2'><Cell N='X' V='0.07794305299250492'/><Cell N='Y' V='0.09762821166319746'/></Row><Row T='LineTo' IX='3'><Cell N='X' V='0.07794305299250492'/><Cell N='Y' V='0.09922218203758959'/></Row><Row T='LineTo' IX='4'><Cell N='X' V='0.1968490445125415'/><Cell N='Y' V='0.09922218203758959'/></Row></Section></Shape><Shape ID='168' Type='Shape' Master='5'><Cell N='PinX' V='3.938999293389704' U='MM' F='Inh'/><Cell N='PinY' V='5.714739035824695' U='MM' F='Inh'/><Cell N='Width' V='0.2480280961086177' U='MM' F='GUARD(EndX-BeginX)'/><Cell N='Height' V='0.1968503937007874' F='GUARD(0.19685039370079DL)'/><Cell N='LocPinX' V='0.1240140480543091' U='MM' F='Inh'/><Cell N='LocPinY' V='0.09842519685039369' F='Inh'/><Cell N='BeginX' V='3.814985245335396' F='PAR(PNT(Sheet.161!Connections.X1,Sheet.161!Connections.Y1))'/><Cell N='BeginY' V='5.714532506518955' F='PAR(PNT(Sheet.161!Connections.X1,Sheet.161!Connections.Y1))'/><Cell N='EndX' V='4.063013341444013' U='MM' F='PAR(PNT(Sheet.149!Connections.X1,Sheet.149!Connections.Y1))'/><Cell N='EndY' V='5.714945565130435' U='MM' F='PAR(PNT(Sheet.149!Connections.X1,Sheet.149!Connections.Y1))'/><Cell N='LayerMember' V='0'/><Cell N='BegTrigger' V='2' F='_XFTRIGGER(Sheet.161!EventXFMod)'/><Cell N='EndTrigger' V='2' F='_XFTRIGGER(Sheet.149!EventXFMod)'/><Cell N='TxtPinX' V='0.1238075187485699' F='Inh'/><Cell N='TxtPinY' V='0.09863172615613225' F='Inh'/><Cell N='ShapeShdwShow' V='2'/><Section N='Control'><Row N='TextPosition'><Cell N='X' V='0.1238075187485683'/><Cell N='Y' V='0.09863172615613358'/><Cell N='XDyn' V='0.1238075187485699' F='Inh'/><Cell N='YDyn' V='0.09863172615613225' F='Inh'/></Row></Section><Section N='Character'><Row IX='0'><Cell N='Font' V='Times New Roman'/><Cell N='ComplexScriptFont' V='Times New Roman'/></Row></Section><Section N='Geometry' IX='0'><Row T='MoveTo' IX='1'><Cell N='Y' V='0.09821866754465436'/></Row><Row T='LineTo' IX='2'><Cell N='X' V='0.07445793259359679'/><Cell N='Y' V='0.09821866754465436'/></Row><Row T='LineTo' IX='3'><Cell N='X' V='0.07445793259359679'/><Cell N='Y' V='0.09863172615613358'/></Row><Row T='LineTo' IX='4'><Cell N='X' V='0.2480280961086159'/><Cell N='Y' V='0.09863172615613358'/></Row></Section></Shape><Shape ID='170' Type='Group' LineStyle='8' FillStyle='8' TextStyle='8'><Cell N='PinX' V='5.809052398970523'/><Cell N='PinY' V='5.705803242456278'/><Cell N='Width' V='0.2440944881889746'/><Cell N='Height' V='0.2440944881889746'/><Cell N='LocPinX' V='0.1220472440944873' F='Width*0.5'/><Cell N='LocPinY' V='0.1220472440944873' F='Height*0.5'/><Cell N='Angle' V='-1.576032314550883'/><Cell N='FlipX' V='0'/><Cell N='FlipY' V='0'/><Cell N='ResizeMode' V='0'/><Cell N='QuickStyleVariation' V='2'/><Cell N='ObjType' V='8'/><Cell N='FillForegnd' V='#d8d8d8' F='THEMEGUARD(MSOTINT(THEMEVAL("Light"),-15))'/><Cell N='FillBkgnd' V='#e2e2e2' F='THEMEGUARD(SHADE(FillForegnd,LUMDIFF(THEMEVAL("FillColor"),THEMEVAL("FillColor2"))))'/><Cell N='ShapeShdwShow' V='2'/><Cell N='FillGradientEnabled' V='0'/><Cell N='SketchEnabled' V='0'/><Section N='Character'><Row IX='0'><Cell N='Font' V='Times New Roman'/><Cell N='Color' V='0'/><Cell N='Style' V='0'/><Cell N='AsianFont' V='SimSun'/><Cell N='ComplexScriptFont' V='Times New Roman'/></Row></Section><Shapes><Shape ID='171' NameU='Circle' Name='圆形' Type='Shape' Master='9'><Cell N='PinX' V='0.1220472440944869' F='Sheet.170!Width*0.5'/><Cell N='PinY' V='0.1220472440944869' F='Sheet.170!Height*0.5'/><Cell N='Width' V='0.2440944881889744' F='Sheet.170!Width*1'/><Cell N='Height' V='0.2440944881889744' F='Sheet.170!Height*1'/><Cell N='LocPinX' V='0.1220472440944872' F='Inh'/><Cell N='LocPinY' V='0.1220472440944872' F='Inh'/><Cell N='TxtPinX' V='0.1220472440944872' F='Inh'/><Cell N='TxtPinY' V='0.1220472440944872' F='Inh'/><Cell N='TxtWidth' V='0.2135826771653526' F='Inh'/><Cell N='TxtHeight' V='0.1830708661417308' F='Inh'/><Cell N='TxtLocPinX' V='0.1067913385826763' F='Inh'/><Cell N='TxtLocPinY' V='0.0915354330708654' F='Inh'/><Cell N='ObjType' V='1'/><Cell N='FillForegnd' V='#d8d8d8' F='THEMEGUARD(MSOTINT(THEMEVAL("Light"),-15))'/><Cell N='FillBkgnd' V='#e2e2e2' F='THEMEGUARD(SHADE(FillForegnd,LUMDIFF(THEMEVAL("FillColor"),THEMEVAL("FillColor2"))))'/><Cell N='ShdwForegnd' V='#000000' F='THEMEVAL("ShadowColor",RGB(0,0,0))'/><Cell N='FillGradientEnabled' V='0'/><Cell N='LineColor' V='#000000' F='THEMEVAL("LineColor",RGB(0,0,0))'/><Cell N='LeftMargin' V='0.02777777777777778' U='PT'/><Cell N='RightMargin' V='0.02777777777777778' U='PT'/><Cell N='TopMargin' V='0.02777777777777778' U='PT'/><Cell N='BottomMargin' V='0.02777777777777778' U='PT'/><Cell N='SketchEnabled' V='0'/><Section N='Connection'><Row T='Connection' IX='0'><Cell N='X' V='0.1220472440944872' F='Inh'/><Cell N='Y' V='0.2440944881889744' F='Inh'/></Row><Row T='Connection' IX='1'><Cell N='X' V='0.1220472440944872' F='Inh'/><Cell N='Y' V='0.1220472440944872' F='Inh'/></Row><Row T='Connection' IX='2'><Cell N='Y' V='0.1220472440944872' F='Inh'/></Row><Row T='Connection' IX='3'><Cell N='X' V='0.1220472440944872' F='Inh'/></Row><Row T='Connection' IX='4'><Cell N='X' V='0.2440944881889744' F='Inh'/><Cell N='Y' V='0.1220472440944872' F='Inh'/></Row><Row T='Connection' IX='5'><Cell N='X' V='0.03573543307086585' F='Inh'/><Cell N='Y' V='0.03573543307086585' F='Inh'/></Row><Row T='Connection' IX='6'><Cell N='X' V='0.2083590551181085' F='Inh'/><Cell N='Y' V='0.03573543307086585' F='Inh'/></Row><Row T='Connection' IX='7'><Cell N='X' V='0.2083590551181085' F='Inh'/><Cell N='Y' V='0.2083590551181085' F='Inh'/></Row><Row T='Connection' IX='8'><Cell N='X' V='0.03573543307086585' F='Inh'/><Cell N='Y' V='0.2083590551181085' F='Inh'/></Row></Section><Section N='Character'><Row IX='0'><Cell N='Font' V='Times New Roman'/><Cell N='Color' V='0'/><Cell N='Style' V='0'/><Cell N='Size' V='0.1111111111111111' U='PT'/><Cell N='AsianFont' V='SimSun'/><Cell N='ComplexScriptFont' V='Times New Roman'/></Row></Section><Section N='Geometry' IX='0'><Row T='MoveTo' IX='1'><Cell N='Y' V='0.1220472440944872' F='Inh'/></Row><Row T='EllipticalArcTo' IX='2'><Cell N='X' V='0.2440944881889744' F='Inh'/><Cell N='Y' V='0.1220472440944872' F='Inh'/><Cell N='A' V='0.1220472440944872' U='DL' F='Inh'/><Cell N='B' V='0.2440944881889744' U='DL' F='Inh'/></Row><Row T='EllipticalArcTo' IX='3'><Cell N='Y' V='0.1220472440944872' F='Inh'/><Cell N='A' V='0.1220472440944872' U='DL' F='Inh'/></Row></Section></Shape><Shape ID='172' Type='Shape' LineStyle='8' FillStyle='8' TextStyle='8'><Cell N='PinX' V='0.1220472440944872' U='MM' F='(BeginX+EndX)/2'/><Cell N='PinY' V='0.1220472440944866' F='(BeginY+EndY)/2'/><Cell N='Width' V='0.2440944881889752' U='MM' F='SQRT((EndX-BeginX)^2+(EndY-BeginY)^2)'/><Cell N='Height' V='0'/><Cell N='LocPinX' V='0.1220472440944876' U='MM' F='Width*0.5'/><Cell N='LocPinY' V='0' F='Height*0.5'/><Cell N='Angle' V='-3.979791406821649E-16' F='ATAN2(EndY-BeginY,EndX-BeginX)'/><Cell N='FlipX' V='0'/><Cell N='FlipY' V='0'/><Cell N='ResizeMode' V='0'/><Cell N='BeginX' V='-3.901012890722336E-16' U='MM' F='PAR(PNT(Sheet.171!Connections.X3,Sheet.171!Connections.Y3))'/><Cell N='BeginY' V='0.1220472440944876' F='PAR(PNT(Sheet.171!Connections.X3,Sheet.171!Connections.Y3))'/><Cell N='EndX' V='0.2440944881889748' F='PAR(PNT(Sheet.171!Connections.X5,Sheet.171!Connections.Y5))'/><Cell N='EndY' V='0.1220472440944875' F='PAR(PNT(Sheet.171!Connections.X5,Sheet.171!Connections.Y5))'/><Cell N='QuickStyleLineMatrix' V='1'/><Cell N='QuickStyleFillMatrix' V='1'/><Cell N='QuickStyleEffectsMatrix' V='1'/><Cell N='QuickStyleFontMatrix' V='1'/><Cell N='FillForegnd' V='#d8d8d8' F='THEMEGUARD(MSOTINT(THEMEVAL("Light"),-15))'/><Cell N='FillBkgnd' V='#e2e2e2' F='THEMEGUARD(SHADE(FillForegnd,LUMDIFF(THEMEVAL("FillColor"),THEMEVAL("FillColor2"))))'/><Cell N='FillGradientEnabled' V='0'/><Cell N='SketchEnabled' V='0'/><Section N='Character'><Row IX='0'><Cell N='Font' V='Times New Roman'/><Cell N='Color' V='0'/><Cell N='Style' V='0'/><Cell N='AsianFont' V='SimSun'/><Cell N='ComplexScriptFont' V='Times New Roman'/></Row></Section><Section N='Geometry' IX='0'><Cell N='NoFill' V='1'/><Cell N='NoLine' V='0'/><Cell N='NoShow' V='0'/><Cell N='NoSnap' V='0'/><Cell N='NoQuickDrag' V='0'/><Row T='MoveTo' IX='1'><Cell N='X' V='0' U='MM' F='Width*0'/><Cell N='Y' V='0'/></Row><Row T='LineTo' IX='2'><Cell N='X' V='0.2440944881889752' U='MM' F='Width*1'/><Cell N='Y' V='0'/></Row></Section></Shape><Shape ID='173' Type='Shape' LineStyle='8' FillStyle='8' TextStyle='8'><Cell N='PinX' V='0.1220472440944869' F='(BeginX+EndX)/2'/><Cell N='PinY' V='0.1220472440944875' U='MM' F='(BeginY+EndY)/2'/><Cell N='Width' V='0.2440944881889743' U='MM' F='SQRT((EndX-BeginX)^2+(EndY-BeginY)^2)'/><Cell N='Height' V='0'/><Cell N='LocPinX' V='0.1220472440944871' U='MM' F='Width*0.5'/><Cell N='LocPinY' V='0' F='Height*0.5'/><Cell N='Angle' V='-1.570796326794893' F='ATAN2(EndY-BeginY,EndX-BeginX)'/><Cell N='FlipX' V='0'/><Cell N='FlipY' V='0'/><Cell N='ResizeMode' V='0'/><Cell N='BeginX' V='0.1220472440944868' F='PAR(PNT(Sheet.171!Connections.X1,Sheet.171!Connections.Y1))'/><Cell N='BeginY' V='0.2440944881889746' F='PAR(PNT(Sheet.171!Connections.X1,Sheet.171!Connections.Y1))'/><Cell N='EndX' V='0.1220472440944876' F='PAR(PNT(Sheet.171!Connections.X4,Sheet.171!Connections.Y4))'/><Cell N='EndY' V='3.901990130526874E-16' U='MM' F='PAR(PNT(Sheet.171!Connections.X4,Sheet.171!Connections.Y4))'/><Cell N='QuickStyleLineMatrix' V='1'/><Cell N='QuickStyleFillMatrix' V='1'/><Cell N='QuickStyleEffectsMatrix' V='1'/><Cell N='QuickStyleFontMatrix' V='1'/><Cell N='FillForegnd' V='#d8d8d8' F='THEMEGUARD(MSOTINT(THEMEVAL("Light"),-15))'/><Cell N='FillBkgnd' V='#e2e2e2' F='THEMEGUARD(SHADE(FillForegnd,LUMDIFF(THEMEVAL("FillColor"),THEMEVAL("FillColor2"))))'/><Cell N='FillGradientEnabled' V='0'/><Cell N='SketchEnabled' V='0'/><Section N='Character'><Row IX='0'><Cell N='Font' V='Times New Roman'/><Cell N='Color' V='0'/><Cell N='Style' V='0'/><Cell N='AsianFont' V='SimSun'/><Cell N='ComplexScriptFont' V='Times New Roman'/></Row></Section><Section N='Geometry' IX='0'><Cell N='NoFill' V='1'/><Cell N='NoLine' V='0'/><Cell N='NoShow' V='0'/><Cell N='NoSnap' V='0'/><Cell N='NoQuickDrag' V='0'/><Row T='MoveTo' IX='1'><Cell N='X' V='0' U='MM' F='Width*0'/><Cell N='Y' V='0'/></Row><Row T='LineTo' IX='2'><Cell N='X' V='0.2440944881889743' U='MM' F='Width*1'/><Cell N='Y' V='0'/></Row></Section></Shape></Shapes></Shape><Shape ID='175' Type='Shape' Master='5'><Cell N='PinX' V='2.775609664284837' U='MM' F='Inh'/><Cell N='PinY' V='5.776830197035199' F='Inh'/><Cell N='Width' V='1.835938089810598' U='MM' F='GUARD(EndX-BeginX)'/><Cell N='Height' V='0.1968503937007874' F='GUARD(0.19685039370079DL)'/><Cell N='LocPinX' V='0.9179690449052991' U='MM' F='Inh'/><Cell N='LocPinY' V='0.09842519685039369' F='Inh'/><Cell N='BeginX' V='1.857640619379538'/><Cell N='BeginY' V='5.716443281494577'/><Cell N='EndX' V='3.693578709190136' U='MM' F='PAR(PNT(Sheet.161!Connections.X3,Sheet.161!Connections.Y3))'/><Cell N='EndY' V='5.837217112575821' F='PAR(PNT(Sheet.161!Connections.X3,Sheet.161!Connections.Y3))'/><Cell N='LayerMember' V='0'/><Cell N='BegTrigger' V='1' F='_XFTRIGGER(EventXFMod)'/><Cell N='EndTrigger' V='2' F='_XFTRIGGER(Sheet.161!EventXFMod)'/><Cell N='ConFixedCode' V='3'/><Cell N='TxtPinX' V='0.8575821293646764' F='Inh'/><Cell N='TxtPinY' V='0.8743805525530526' F='Inh'/><Cell N='ShapeShdwShow' V='2'/><Section N='Control'><Row N='TextPosition'><Cell N='X' V='0.8575821293646769'/><Cell N='Y' V='0.874380552553053'/><Cell N='XDyn' V='0.8575821293646764' F='Inh'/><Cell N='YDyn' V='0.8743805525530526' F='Inh'/></Row></Section><Section N='Character'><Row IX='0'><Cell N='Font' V='Times New Roman'/><Cell N='ComplexScriptFont' V='Times New Roman'/></Row></Section><Section N='Geometry' IX='0'><Row T='MoveTo' IX='1'><Cell N='Y' V='0.03803828130977038'/></Row><Row T='LineTo' IX='2'><Cell N='X' V='8.881784197001252E-16'/><Cell N='Y' V='0.8743805525530526'/></Row><Row T='LineTo' IX='3'><Cell N='X' V='1.8359380898106'/><Cell N='Y' V='0.8743805525530526'/></Row><Row T='LineTo' IX='4'><Cell N='X' V='1.8359380898106'/><Cell N='Y' V='0.1588121123910167'/></Row></Section></Shape><Shape ID='176' Type='Shape' Master='5'><Cell N='PinX' V='6.030506056210357' F='Inh'/><Cell N='PinY' V='5.704643703221957' F='Inh'/><Cell N='Width' V='0.1988161722775423' F='GUARD(EndX-BeginX)'/><Cell N='Height' V='-0.1968503937007874' F='GUARD(-0.19685039370079DL)'/><Cell N='LocPinX' V='0.09940808613877117' F='Inh'/><Cell N='LocPinY' V='-0.09842519685039369' F='Inh'/><Cell N='BeginX' V='5.931097970071586' F='PAR(PNT(Sheet.171!Connections.X1,Sheet.171!Connections.Y1))'/><Cell N='BeginY' V='5.705164207500475' F='PAR(PNT(Sheet.171!Connections.X1,Sheet.171!Connections.Y1))'/><Cell N='EndX' V='6.129914142349128'/><Cell N='EndY' V='5.70412319894344'/><Cell N='LayerMember' V='0'/><Cell N='BegTrigger' V='2' F='_XFTRIGGER(Sheet.171!EventXFMod)'/><Cell N='EndTrigger' V='1' F='_XFTRIGGER(EventXFMod)'/><Cell N='TxtPinX' V='0.09888758186027258' F='Inh'/><Cell N='TxtPinY' V='-0.09894570112889056' F='Inh'/><Cell N='ShapeShdwShow' V='2'/><Section N='Control'><Row N='TextPosition'><Cell N='X' V='0.09888758186025967'/><Cell N='Y' V='-0.09894570112890433'/><Cell N='XDyn' V='0.09888758186027258' F='Inh'/><Cell N='YDyn' V='-0.09894570112889056' F='Inh'/></Row></Section><Section N='Character'><Row IX='0'><Cell N='Font' V='Times New Roman'/><Cell N='ComplexScriptFont' V='Times New Roman'/></Row></Section><Section N='Geometry' IX='0'><Row T='MoveTo' IX='1'><Cell N='Y' V='-0.09790469257187695'/></Row><Row T='LineTo' IX='2'><Cell N='X' V='0.07445793259359679'/><Cell N='Y' V='-0.09790469257187695'/></Row><Row T='LineTo' IX='3'><Cell N='X' V='0.07445793259359679'/><Cell N='Y' V='-0.09894570112891099'/></Row><Row T='LineTo' IX='4'><Cell N='X' V='0.1988161722775423'/><Cell N='Y' V='-0.09894570112891099'/></Row></Section></Shape><Shape ID='180' Type='Shape' Master='5'><Cell N='PinX' V='4.862534501938558' U='MM' F='Inh'/><Cell N='PinY' V='5.771397189343889' F='Inh'/><Cell N='Width' V='1.894313863975537' U='MM' F='GUARD(EndX-BeginX)'/><Cell N='Height' V='0.1968503937007874' F='GUARD(0.19685039370079DL)'/><Cell N='LocPinX' V='0.9471569319877684' U='MM' F='Inh'/><Cell N='LocPinY' V='0.09842519685039369' F='Inh'/><Cell N='BeginX' V='3.91537756995079'/><Cell N='BeginY' V='5.714945565130435'/><Cell N='EndX' V='5.809691433926327' U='MM' F='PAR(PNT(Sheet.171!Connections.X3,Sheet.171!Connections.Y3))'/><Cell N='EndY' V='5.827848813557341' F='PAR(PNT(Sheet.171!Connections.X3,Sheet.171!Connections.Y3))'/><Cell N='LayerMember' V='0'/><Cell N='BegTrigger' V='1' F='_XFTRIGGER(EventXFMod)'/><Cell N='EndTrigger' V='2' F='_XFTRIGGER(Sheet.171!EventXFMod)'/><Cell N='ConFixedCode' V='3'/><Cell N='TxtPinX' V='0.8907053077743152' F='Inh'/><Cell N='TxtPinY' V='0.8785769523593228' F='Inh'/><Section N='Control'><Row N='TextPosition'><Cell N='X' V='0.8907053077743158'/><Cell N='Y' V='0.878576952359322'/><Cell N='XDyn' V='0.8907053077743152' F='Inh'/><Cell N='YDyn' V='0.8785769523593228' F='Inh'/></Row></Section><Section N='Character'><Row IX='0'><Cell N='Font' V='Times New Roman'/><Cell N='ComplexScriptFont' V='Times New Roman'/></Row></Section><Section N='Geometry' IX='0'><Row T='MoveTo' IX='1'><Cell N='Y' V='0.04197357263694013'/></Row><Row T='LineTo' IX='2'><Cell N='Y' V='0.8785769523593219'/></Row><Row T='LineTo' IX='3'><Cell N='X' V='1.894313863975538'/><Cell N='Y' V='0.8785769523593219'/></Row><Row T='LineTo' IX='4'><Cell N='X' V='1.894313863975538'/><Cell N='Y' V='0.1548768210638469'/></Row></Section></Shape></Shapes><Connects><Connect FromSheet='180' FromCell='EndX' FromPart='12' ToSheet='171' ToCell='Connections.X3' ToPart='102'/><Connect FromSheet='176' FromCell='BeginX' FromPart='9' ToSheet='171' ToCell='Connections.X1' ToPart='100'/><Connect FromSheet='175' FromCell='EndX' FromPart='12' ToSheet='161' ToCell='Connections.X3' ToPart='102'/><Connect FromSheet='173' FromCell='EndX' FromPart='12' ToSheet='171' ToCell='Connections.X4' ToPart='103'/><Connect FromSheet='173' FromCell='BeginX' FromPart='9' ToSheet='171' ToCell='Connections.X1' ToPart='100'/><Connect FromSheet='172' FromCell='EndX' FromPart='12' ToSheet='171' ToCell='Connections.X5' ToPart='104'/><Connect FromSheet='172' FromCell='BeginX' FromPart='9' ToSheet='171' ToCell='Connections.X3' ToPart='102'/><Connect FromSheet='168' FromCell='EndX' FromPart='12' ToSheet='149' ToCell='Connections.X1' ToPart='100'/><Connect FromSheet='168' FromCell='BeginX' FromPart='9' ToSheet='161' ToCell='Connections.X1' ToPart='100'/><Connect FromSheet='167' FromCell='EndX' FromPart='12' ToSheet='161' ToCell='Connections.X4' ToPart='103'/><Connect FromSheet='167' FromCell='BeginX' FromPart='9' ToSheet='151' ToCell='Connections.X3' ToPart='102'/><Connect FromSheet='165' FromCell='EndX' FromPart='12' ToSheet='161' ToCell='Connections.X4' ToPart='103'/><Connect FromSheet='165' FromCell='BeginX' FromPart='9' ToSheet='161' ToCell='Connections.X1' ToPart='100'/><Connect FromSheet='164' FromCell='EndX' FromPart='12' ToSheet='161' ToCell='Connections.X5' ToPart='104'/><Connect FromSheet='164' FromCell='BeginX' FromPart='9' ToSheet='161' ToCell='Connections.X3' ToPart='102'/><Connect FromSheet='159' FromCell='EndX' FromPart='12' ToSheet='153' ToCell='Connections.X1' ToPart='100'/><Connect FromSheet='154' FromCell='BeginX' FromPart='9' ToSheet='148' ToCell='Connections.X3' ToPart='102'/><Connect FromSheet='154' FromCell='EndX' FromPart='12' ToSheet='147' ToCell='Connections.X1' ToPart='100'/><Connect FromSheet='155' FromCell='BeginX' FromPart='9' ToSheet='149' ToCell='Connections.X3' ToPart='102'/><Connect FromSheet='155' FromCell='EndX' FromPart='12' ToSheet='148' ToCell='Connections.X1' ToPart='100'/><Connect FromSheet='157' FromCell='BeginX' FromPart='9' ToSheet='152' ToCell='Connections.X3' ToPart='102'/><Connect FromSheet='158' FromCell='BeginX' FromPart='9' ToSheet='153' ToCell='Connections.X3' ToPart='102'/><Connect FromSheet='158' FromCell='EndX' FromPart='12' ToSheet='152' ToCell='Connections.X1' ToPart='100'/><Connect FromSheet='157' FromCell='EndX' FromPart='12' ToSheet='151' ToCell='PinX' ToPart='3'/></Connects></PageContents>
