# Supplementary material for: Video captioning based on vision transformer and reinforcement learning
Source: PeerJ Comput Sci. 2022 Mar 16;8:e916. doi: 10.7717/peerj-cs.916 (PMC9044334; doi:10.7717/peerj-cs.916)
Supplement: Supplemental Information 3 — Specifically, the encoding block first inputs the features into Layer Norm and Multi-Head Attention, and then sends them to the MLP block. [file peerj-cs-08-916-s003.vsdx › visio/pages/pages.xml]

<?xml version='1.0' encoding='utf-8' ?>
<Pages xmlns='http://schemas.microsoft.com/office/visio/2012/main' xmlns:r='http://schemas.openxmlformats.org/officeDocument/2006/relationships' xml:space='preserve'><Page ID='0' NameU='Page-1' Name='页-1' ViewScale='0.67' ViewCenterX='7.8661419685587' ViewCenterY='8.2519687518013'><PageSheet LineStyle='0' FillStyle='0' TextStyle='0'><Cell N='PageWidth' V='8.26771653543307' U='MM'/><Cell N='PageHeight' V='11.69291338582677' U='MM'/><Cell N='ShdwOffsetX' V='0.05905511811023622' U='MM'/><Cell N='ShdwOffsetY' V='-0.05905511811023622' U='MM'/><Cell N='PageScale' V='0.03937007874015748' U='MM'/><Cell N='DrawingScale' V='0.03937007874015748' U='MM'/><Cell N='DrawingSizeType' V='0'/><Cell N='DrawingScaleType' V='0'/><Cell N='InhibitSnap' V='0'/><Cell N='PageLockReplace' V='0' U='BOOL'/><Cell N='PageLockDuplicate' V='0' U='BOOL'/><Cell N='UIVisibility' V='0'/><Cell N='ShdwType' V='0'/><Cell N='ShdwObliqueAngle' V='0'/><Cell N='ShdwScaleFactor' V='1'/><Cell N='DrawingResizeType' V='1'/><Cell N='PlaceStyle' V='1'/><Cell N='RouteStyle' V='5'/><Cell N='PlaceDepth' V='1'/><Cell N='LineToNodeX' V='0.1968503937007874' U='MM'/><Cell N='LineToNodeY' V='0.1968503937007874' U='MM'/><Cell N='BlockSizeX' V='0.984251968503937' U='MM'/><Cell N='BlockSizeY' V='0.984251968503937' U='MM'/><Cell N='AvenueSizeX' V='0.5905511811023622' U='MM'/><Cell N='AvenueSizeY' V='0.5905511811023622' U='MM'/><Cell N='LineToLineX' V='0.1968503937007874' U='MM'/><Cell N='LineToLineY' V='0.1968503937007874' U='MM'/><Cell N='PageShapeSplit' V='1'/><Section N='Layer'><Row IX='0'><Cell N='Name' V='连接线'/><Cell N='Color' V='255'/><Cell N='Status' V='0'/><Cell N='Visible' V='1'/><Cell N='Print' V='1'/><Cell N='Active' V='0'/><Cell N='Lock' V='0'/><Cell N='Snap' V='1'/><Cell N='Glue' V='1'/><Cell N='NameUniv' V='Connector'/><Cell N='ColorTrans' V='0'/></Row></Section></PageSheet><Rel r:id='rId1'/></Page></Pages>
