# Supplementary material for: Video captioning based on vision transformer and reinforcement learning
Source: PeerJ Comput Sci. 2022 Mar 16;8:e916. doi: 10.7717/peerj-cs.916 (PMC9044334; doi:10.7717/peerj-cs.916)
Supplement: Supplemental Information 4 [file peerj-cs-08-916-s004.vsdx]

Archive with 107 entries (107 files):
- [Content_Types].xml
- _rels/.rels
- visio/document.xml
- visio/masters/masters.xml
- visio/pages/pages.xml
- visio/_rels/document.xml.rels
- visio/masters/_rels/masters.xml.rels
- visio/pages/_rels/pages.xml.rels
- visio/masters/master1.xml
- visio/masters/master2.xml
- visio/masters/master3.xml
- visio/masters/master4.xml
- visio/masters/master5.xml
- visio/pages/page1.xml
- visio/pages/_rels/page1.xml.rels
- visio/media/image3.emf
- visio/embeddings/oleObject4.bin
- visio/media/image4.emf
- visio/embeddings/oleObject5.bin
- visio/media/image5.emf
- visio/embeddings/oleObject6.bin
- visio/media/image6.emf
- visio/embeddings/oleObject7.bin
- visio/media/image7.emf
- visio/embeddings/oleObject8.bin
- visio/media/image8.emf
- visio/embeddings/oleObject9.bin
- visio/media/image9.emf
- visio/embeddings/oleObject10.bin
- visio/media/image10.emf
- visio/embeddings/oleObject11.bin
- visio/media/image11.emf
- visio/embeddings/oleObject12.bin
- visio/media/image12.emf
- visio/embeddings/oleObject13.bin
- visio/media/image13.emf
- visio/embeddings/oleObject14.bin
- visio/media/image14.emf
- visio/embeddings/oleObject15.bin
- visio/media/image15.emf
- visio/embeddings/oleObject16.bin
- visio/media/image16.emf
- visio/embeddings/oleObject17.bin
- visio/media/image17.emf
- visio/embeddings/oleObject18.bin
- visio/media/image18.emf
- visio/embeddings/oleObject19.bin
- visio/media/image19.emf
- visio/embeddings/oleObject20.bin
- visio/media/image20.emf
- visio/embeddings/oleObject21.bin
- visio/media/image21.emf
- visio/embeddings/oleObject22.bin
- visio/media/image22.emf
- visio/embeddings/oleObject23.bin
- visio/media/image23.emf
- visio/embeddings/oleObject24.bin
- visio/media/image24.emf
- visio/embeddings/oleObject25.bin
- visio/media/image25.emf
- visio/embeddings/oleObject26.bin
- visio/media/image26.emf
- visio/embeddings/oleObject27.bin
- visio/media/image27.emf
- visio/embeddings/oleObject28.bin
- visio/media/image28.emf
- visio/embeddings/oleObject29.bin
- visio/media/image29.emf
- docProps/thumbnail.emf
- visio/windows.xml
- visio/embeddings/oleObject1.bin
- visio/media/image1.emf
- visio/embeddings/oleObject2.bin
- visio/media/image2.emf
- visio/embeddings/_rels/oleObject1.bin.rels
- visio/embeddings/_rels/oleObject2.bin.rels
- visio/embeddings/_rels/oleObject3.bin.rels
- visio/embeddings/oleObject3.bin
- visio/embeddings/_rels/oleObject5.bin.rels
- visio/embeddings/_rels/oleObject6.bin.rels
- visio/embeddings/_rels/oleObject7.bin.rels
- visio/embeddings/_rels/oleObject8.bin.rels
- visio/embeddings/_rels/oleObject9.bin.rels
- visio/embeddings/_rels/oleObject10.bin.rels
- visio/embeddings/_rels/oleObject11.bin.rels
- visio/embeddings/_rels/oleObject12.bin.rels
- visio/embeddings/_rels/oleObject13.bin.rels
- visio/embeddings/_rels/oleObject14.bin.rels
- visio/embeddings/_rels/oleObject15.bin.rels
- visio/embeddings/_rels/oleObject16.bin.rels
- visio/embeddings/_rels/oleObject4.bin.rels
- visio/embeddings/_rels/oleObject18.bin.rels
- visio/embeddings/_rels/oleObject19.bin.rels
- visio/embeddings/_rels/oleObject20.bin.rels
- visio/embeddings/_rels/oleObject21.bin.rels
- visio/embeddings/_rels/oleObject22.bin.rels
- visio/embeddings/_rels/oleObject23.bin.rels
- visio/embeddings/_rels/oleObject24.bin.rels
- visio/embeddings/_rels/oleObject25.bin.rels
- visio/embeddings/_rels/oleObject26.bin.rels
- visio/embeddings/_rels/oleObject27.bin.rels
- visio/embeddings/_rels/oleObject28.bin.rels
- visio/embeddings/_rels/oleObject29.bin.rels
- visio/embeddings/_rels/oleObject17.bin.rels
- docProps/custom.xml
- docProps/core.xml
- docProps/app.xml
