# Supplementary material for: Video captioning based on vision transformer and reinforcement learning
Source: PeerJ Comput Sci. 2022 Mar 16;8:e916. doi: 10.7717/peerj-cs.916 (PMC9044334; doi:10.7717/peerj-cs.916)
Supplement: Supplemental Information 4 [file peerj-cs-08-916-s004.vsdx › visio/pages/_rels/page1.xml.rels]

<?xml version="1.0" encoding="UTF-8" standalone="yes"?>
<Relationships xmlns="http://schemas.openxmlformats.org/package/2006/relationships"><Relationship Id="rId8" Type="http://schemas.openxmlformats.org/officeDocument/2006/relationships/oleObject" Target="../embeddings/oleObject5.bin"/><Relationship Id="rId13" Type="http://schemas.openxmlformats.org/officeDocument/2006/relationships/oleObject" Target="../embeddings/oleObject10.bin"/><Relationship Id="rId18" Type="http://schemas.openxmlformats.org/officeDocument/2006/relationships/oleObject" Target="../embeddings/oleObject15.bin"/><Relationship Id="rId26" Type="http://schemas.openxmlformats.org/officeDocument/2006/relationships/oleObject" Target="../embeddings/oleObject23.bin"/><Relationship Id="rId3" Type="http://schemas.microsoft.com/visio/2010/relationships/master" Target="../masters/master5.xml"/><Relationship Id="rId21" Type="http://schemas.openxmlformats.org/officeDocument/2006/relationships/oleObject" Target="../embeddings/oleObject18.bin"/><Relationship Id="rId7" Type="http://schemas.openxmlformats.org/officeDocument/2006/relationships/oleObject" Target="../embeddings/oleObject4.bin"/><Relationship Id="rId12" Type="http://schemas.openxmlformats.org/officeDocument/2006/relationships/oleObject" Target="../embeddings/oleObject9.bin"/><Relationship Id="rId17" Type="http://schemas.openxmlformats.org/officeDocument/2006/relationships/oleObject" Target="../embeddings/oleObject14.bin"/><Relationship Id="rId25" Type="http://schemas.openxmlformats.org/officeDocument/2006/relationships/oleObject" Target="../embeddings/oleObject22.bin"/><Relationship Id="rId2" Type="http://schemas.microsoft.com/visio/2010/relationships/master" Target="../masters/master2.xml"/><Relationship Id="rId16" Type="http://schemas.openxmlformats.org/officeDocument/2006/relationships/oleObject" Target="../embeddings/oleObject13.bin"/><Relationship Id="rId20" Type="http://schemas.openxmlformats.org/officeDocument/2006/relationships/oleObject" Target="../embeddings/oleObject17.bin"/><Relationship Id="rId29" Type="http://schemas.openxmlformats.org/officeDocument/2006/relationships/oleObject" Target="../embeddings/oleObject26.bin"/><Relationship Id="rId1" Type="http://schemas.microsoft.com/visio/2010/relationships/master" Target="../masters/master3.xml"/><Relationship Id="rId6" Type="http://schemas.openxmlformats.org/officeDocument/2006/relationships/oleObject" Target="../embeddings/oleObject3.bin"/><Relationship Id="rId11" Type="http://schemas.openxmlformats.org/officeDocument/2006/relationships/oleObject" Target="../embeddings/oleObject8.bin"/><Relationship Id="rId24" Type="http://schemas.openxmlformats.org/officeDocument/2006/relationships/oleObject" Target="../embeddings/oleObject21.bin"/><Relationship Id="rId32" Type="http://schemas.openxmlformats.org/officeDocument/2006/relationships/oleObject" Target="../embeddings/oleObject29.bin"/><Relationship Id="rId5" Type="http://schemas.openxmlformats.org/officeDocument/2006/relationships/oleObject" Target="../embeddings/oleObject2.bin"/><Relationship Id="rId15" Type="http://schemas.openxmlformats.org/officeDocument/2006/relationships/oleObject" Target="../embeddings/oleObject12.bin"/><Relationship Id="rId23" Type="http://schemas.openxmlformats.org/officeDocument/2006/relationships/oleObject" Target="../embeddings/oleObject20.bin"/><Relationship Id="rId28" Type="http://schemas.openxmlformats.org/officeDocument/2006/relationships/oleObject" Target="../embeddings/oleObject25.bin"/><Relationship Id="rId10" Type="http://schemas.openxmlformats.org/officeDocument/2006/relationships/oleObject" Target="../embeddings/oleObject7.bin"/><Relationship Id="rId19" Type="http://schemas.openxmlformats.org/officeDocument/2006/relationships/oleObject" Target="../embeddings/oleObject16.bin"/><Relationship Id="rId31" Type="http://schemas.openxmlformats.org/officeDocument/2006/relationships/oleObject" Target="../embeddings/oleObject28.bin"/><Relationship Id="rId4" Type="http://schemas.openxmlformats.org/officeDocument/2006/relationships/oleObject" Target="../embeddings/oleObject1.bin"/><Relationship Id="rId9" Type="http://schemas.openxmlformats.org/officeDocument/2006/relationships/oleObject" Target="../embeddings/oleObject6.bin"/><Relationship Id="rId14" Type="http://schemas.openxmlformats.org/officeDocument/2006/relationships/oleObject" Target="../embeddings/oleObject11.bin"/><Relationship Id="rId22" Type="http://schemas.openxmlformats.org/officeDocument/2006/relationships/oleObject" Target="../embeddings/oleObject19.bin"/><Relationship Id="rId27" Type="http://schemas.openxmlformats.org/officeDocument/2006/relationships/oleObject" Target="../embeddings/oleObject24.bin"/><Relationship Id="rId30" Type="http://schemas.openxmlformats.org/officeDocument/2006/relationships/oleObject" Target="../embeddings/oleObject27.bin"/></Relationships>
