# Supplementary material for: Video captioning based on vision transformer and reinforcement learning
Source: PeerJ Comput Sci. 2022 Mar 16;8:e916. doi: 10.7717/peerj-cs.916 (PMC9044334; doi:10.7717/peerj-cs.916)
Supplement: Supplemental Information 4 [file peerj-cs-08-916-s004.vsdx › visio/pages/page1.xml]

<?xml version='1.0' encoding='utf-8' ?>
<PageContents xmlns='http://schemas.microsoft.com/office/visio/2012/main' xmlns:r='http://schemas.openxmlformats.org/officeDocument/2006/relationships' xml:space='preserve'><Shapes><Shape ID='153' NameU='Rectangle.89' IsCustomNameU='1' Name='矩形.89' IsCustomName='1' Type='Shape' Master='4'><Cell N='PinX' V='1.712266887412091'/><Cell N='PinY' V='4.376716205064688'/><Cell N='Width' V='2.165354389455119'/><Cell N='Height' V='1.416818022173294'/><Cell N='LocPinX' V='1.082677194727559' F='Inh'/><Cell N='LocPinY' V='0.7084090110866472' F='Inh'/><Cell N='FillPattern' V='0'/><Cell N='FillGradientEnabled' V='0'/><Cell N='RotateGradientWithShape' V='0'/><Cell N='UseGroupGradient' V='0'/><Cell N='Rounding' V='0.1574803149606299'/><Section N='Connection'><Row T='Connection' IX='0'><Cell N='X' V='1.082677194727559' F='Inh'/></Row><Row T='Connection' IX='1'><Cell N='X' V='2.165354389455119' F='Inh'/><Cell N='Y' V='0.7084090110866472' F='Inh'/></Row><Row T='Connection' IX='2'><Cell N='X' V='1.082677194727559' F='Inh'/><Cell N='Y' V='1.416818022173294' F='Inh'/></Row><Row T='Connection' IX='3'><Cell N='Y' V='0.7084090110866472' F='Inh'/></Row><Row T='Connection' IX='4'><Cell N='X' V='1.082677194727559' F='Inh'/><Cell N='Y' V='0.7084090110866472' F='Inh'/></Row></Section><Section N='Geometry' IX='0'><Row T='LineTo' IX='2'><Cell N='X' V='2.165354389455119' F='Inh'/></Row><Row T='LineTo' IX='3'><Cell N='X' V='2.165354389455119' F='Inh'/><Cell N='Y' V='1.416818022173294' F='Inh'/></Row><Row T='LineTo' IX='4'><Cell N='Y' V='1.416818022173294' F='Inh'/></Row></Section></Shape><Shape ID='154' NameU='Dynamic connector.1' Name='动态连接线.1' Type='Shape' Master='5'><Cell N='PinX' V='0.6166389746286947' U='MM' F='Inh'/><Cell N='PinY' V='4.950165898365484' F='Inh'/><Cell N='Width' V='0.1968503937007874' F='GUARD(0.19685039370079DL)'/><Cell N='Height' V='0.1968503937007874' F='GUARD(0.19685039370079DL)'/><Cell N='LocPinX' V='0.09842519685039369' F='Inh'/><Cell N='LocPinY' V='0.09842519685039369' F='Inh'/><Cell N='BeginX' V='0.5441152085493881'/><Cell N='BeginY' V='4.947834738055418'/><Cell N='EndX' V='0.6891627407080012' U='MM' F='PAR(PNT(Sheet.157!Connections.X3,Sheet.157!Connections.Y3))'/><Cell N='EndY' V='4.952497058675551' F='PAR(PNT(Sheet.157!Connections.X3,Sheet.157!Connections.Y3))'/><Cell N='LayerMember' V='0'/><Cell N='BegTrigger' V='1' F='_XFTRIGGER(EventXFMod)'/><Cell N='EndTrigger' V='2' F='_XFTRIGGER(Sheet.157!EventXFMod)'/><Cell N='TxtPinX' V='0.09972032840888206' F='Inh'/><Cell N='TxtPinY' V='0.09713006529190556' F='Inh'/><Cell N='EndArrow' V='0'/><Cell N='FillForegnd' V='#000000' F='Inh'/><Cell N='FillBkgnd' V='#ffffff' F='Inh'/><Cell N='ShdwForegnd' V='#000000' F='Inh'/><Cell N='ShapeShdwShow' V='2'/><Section N='Control'><Row N='TextPosition'><Cell N='X' V='0.09972032840888195'/><Cell N='Y' V='0.09713006529190567'/><Cell N='XDyn' V='0.09972032840888206' F='Inh'/><Cell N='YDyn' V='0.09713006529190556' F='Inh'/></Row></Section><Section N='Geometry' IX='0'><Row T='MoveTo' IX='1'><Cell N='X' V='0.02590143077108698'/><Cell N='Y' V='0.09609403654032711'/></Row><Row T='LineTo' IX='2'><Cell N='X' V='0.09972032840888223'/><Cell N='Y' V='0.09609403654032711'/></Row><Row T='LineTo' IX='3'><Cell N='X' V='0.09972032840888223'/><Cell N='Y' V='0.1007563571604599'/></Row><Row T='LineTo' IX='4'><Cell N='X' V='0.1709489629297005'/><Cell N='Y' V='0.1007563571604599'/></Row></Section></Shape><Shape ID='155' NameU='Dynamic connector.2' Name='Dynamic connector.2' Type='Shape' Master='5'><Cell N='PinX' V='2.690043496550565' F='Inh'/><Cell N='PinY' V='4.026574880955937' U='MM' F='Inh'/><Cell N='Width' V='0.432553000990632' F='GUARD(EndX-BeginX)'/><Cell N='Height' V='-0.622047281799027' U='MM' F='GUARD(EndY-BeginY)'/><Cell N='LocPinX' V='0.216276500495316' F='Inh'/><Cell N='LocPinY' V='-0.3110236408995135' U='MM' F='Inh'/><Cell N='BeginX' V='2.473766996055249' F='PAR(PNT(Sheet.167!Connections.X4,Sheet.167!Connections.Y4))'/><Cell N='BeginY' V='4.33759852185545' U='MM' F='PAR(PNT(Sheet.167!Connections.X4,Sheet.167!Connections.Y4))'/><Cell N='EndX' V='2.906319997045881'/><Cell N='EndY' V='3.715551240056423'/><Cell N='LayerMember' V='0'/><Cell N='BegTrigger' V='2' F='_XFTRIGGER(Sheet.167!EventXFMod)'/><Cell N='EndTrigger' V='1' F='_XFTRIGGER(EventXFMod)'/><Cell N='TxtPinY' V='-0.5273001413948307' F='Inh'/><Cell N='ConFixedCode' V='3'/><Cell N='FillForegnd' V='#000000' F='Inh'/><Cell N='FillBkgnd' V='#ffffff' F='Inh'/><Cell N='ShdwForegnd' V='#000000' F='Inh'/><Cell N='ShapeShdwShow' V='2'/><Section N='Control'><Row N='TextPosition'><Cell N='Y' V='-0.5273001413948305'/><Cell N='YDyn' V='-0.5273001413948307' F='Inh'/></Row></Section><Section N='Geometry' IX='0'><Row T='LineTo' IX='2'><Cell N='Y' V='-0.6220472817990288'/></Row><Row T='LineTo' IX='3'><Cell N='X' V='0.432553000990632'/><Cell N='Y' V='-0.6220472817990288'/></Row></Section></Shape><Shape ID='156' Type='Group' LineStyle='8' FillStyle='8' TextStyle='8'><Cell N='PinX' V='0.797430475821046'/><Cell N='PinY' V='4.952497058675551'/><Cell N='Width' V='0.2165354702260895'/><Cell N='Height' V='0.2165354702260895'/><Cell N='LocPinX' V='0.1082677351130448' F='Width*0.5'/><Cell N='LocPinY' V='0.1082677351130448' F='Height*0.5'/><Cell N='Angle' V='0'/><Cell N='FlipX' V='0'/><Cell N='FlipY' V='0'/><Cell N='ResizeMode' V='0'/><Cell N='QuickStyleVariation' V='2'/><Cell N='ObjType' V='8'/><Cell N='ShapeShdwShow' V='2'/><Shapes><Shape ID='157' NameU='Circle' Name='圆形' Type='Shape' Master='9'><Cell N='PinX' V='0.1082677351130448' F='Sheet.156!Width*0.5'/><Cell N='PinY' V='0.1082677351130448' F='Sheet.156!Height*0.5'/><Cell N='Width' V='0.2165354702260895' F='Sheet.156!Width*1'/><Cell N='Height' V='0.2165354702260895' F='Sheet.156!Height*1'/><Cell N='LocPinX' V='0.1082677351130448' F='Inh'/><Cell N='LocPinY' V='0.1082677351130448' F='Inh'/><Cell N='TxtPinX' V='0.1082677351130448' F='Inh'/><Cell N='TxtPinY' V='0.1082677351130448' F='Inh'/><Cell N='TxtWidth' V='0.1894685364478283' F='Inh'/><Cell N='TxtHeight' V='0.1624016026695672' F='Inh'/><Cell N='TxtLocPinX' V='0.09473426822391416' F='Inh'/><Cell N='TxtLocPinY' V='0.08120080133478358' F='Inh'/><Cell N='ObjType' V='1'/><Section N='Connection'><Row T='Connection' IX='0'><Cell N='X' V='0.1082677351130448' F='Inh'/><Cell N='Y' V='0.2165354702260895' F='Inh'/></Row><Row T='Connection' IX='1'><Cell N='X' V='0.1082677351130448' F='Inh'/><Cell N='Y' V='0.1082677351130448' F='Inh'/></Row><Row T='Connection' IX='2'><Cell N='Y' V='0.1082677351130448' F='Inh'/></Row><Row T='Connection' IX='3'><Cell N='X' V='0.1082677351130448' F='Inh'/></Row><Row T='Connection' IX='4'><Cell N='X' V='0.2165354702260895' F='Inh'/><Cell N='Y' V='0.1082677351130448' F='Inh'/></Row><Row T='Connection' IX='5'><Cell N='X' V='0.03170079284109951' F='Inh'/><Cell N='Y' V='0.03170079284109951' F='Inh'/></Row><Row T='Connection' IX='6'><Cell N='X' V='0.18483467738499' F='Inh'/><Cell N='Y' V='0.03170079284109951' F='Inh'/></Row><Row T='Connection' IX='7'><Cell N='X' V='0.18483467738499' F='Inh'/><Cell N='Y' V='0.18483467738499' F='Inh'/></Row><Row T='Connection' IX='8'><Cell N='X' V='0.03170079284109951' F='Inh'/><Cell N='Y' V='0.18483467738499' F='Inh'/></Row></Section><Section N='Geometry' IX='0'><Row T='MoveTo' IX='1'><Cell N='Y' V='0.1082677351130448' F='Inh'/></Row><Row T='EllipticalArcTo' IX='2'><Cell N='X' V='0.2165354702260895' F='Inh'/><Cell N='Y' V='0.1082677351130448' F='Inh'/><Cell N='A' V='0.1082677351130448' U='DL' F='Inh'/><Cell N='B' V='0.2165354702260895' U='DL' F='Inh'/></Row><Row T='EllipticalArcTo' IX='3'><Cell N='Y' V='0.1082677351130448' F='Inh'/><Cell N='A' V='0.1082677351130448' U='DL' F='Inh'/></Row></Section></Shape><Shape ID='158' NameU='Dynamic connector.11' Name='动态连接线.11' Type='Shape' Master='5'><Cell N='PinX' V='0.1082677351130448' F='Inh'/><Cell N='PinY' V='0.1082677351130448' F='Inh'/><Cell N='Width' V='0.1968503937007874' F='GUARD(0.19685039370079DL)'/><Cell N='Height' V='0.1968503937007874' F='GUARD(0.19685039370079DL)'/><Cell N='LocPinX' V='0.09842519685039369' F='Inh'/><Cell N='LocPinY' V='0.09842519685039369' F='Inh'/><Cell N='BeginX' V='0.0317007928410995' F='PAR(PNT(Sheet.157!Connections.X6,Sheet.157!Connections.Y6))'/><Cell N='BeginY' V='0.03170079284109928' F='PAR(PNT(Sheet.157!Connections.X6,Sheet.157!Connections.Y6))'/><Cell N='EndX' V='0.18483467738499' F='PAR(PNT(Sheet.157!Connections.X8,Sheet.157!Connections.Y8))'/><Cell N='EndY' V='0.1848346773849903' F='PAR(PNT(Sheet.157!Connections.X8,Sheet.157!Connections.Y8))'/><Cell N='LayerMember' V='0'/><Cell N='BegTrigger' V='2' F='_XFTRIGGER(Sheet.157!EventXFMod)'/><Cell N='EndTrigger' V='2' F='_XFTRIGGER(Sheet.157!EventXFMod)'/><Cell N='ShapeRouteStyle' V='16'/><Cell N='ConLineRouteExt' V='1'/><Cell N='TxtPinX' V='0.09842519927769902' F='Inh'/><Cell N='TxtPinY' V='0.09842519927769902' F='Inh'/><Cell N='EndArrow' V='0'/><Section N='Control'><Row N='TextPosition'><Cell N='X' V='0.09842519927769902'/><Cell N='Y' V='0.09842519927769902'/><Cell N='XDyn' V='0.09842519927769902' F='Inh'/><Cell N='YDyn' V='0.09842519927769902' F='Inh'/></Row></Section><Section N='Geometry' IX='0'><Row T='MoveTo' IX='1'><Cell N='X' V='0.02185825457844842'/><Cell N='Y' V='0.0218582545784482'/></Row><Row T='LineTo' IX='2'><Cell N='X' V='0.174992139122339'/><Cell N='Y' V='0.1749921391223392'/></Row><Row T='LineTo' IX='3' Del='1'/></Section></Shape><Shape ID='159' NameU='Dynamic connector.12' Name='动态连接线.12' Type='Shape' Master='5'><Cell N='PinX' V='0.1082677351130448' F='Inh'/><Cell N='PinY' V='0.1082677351130448' F='Inh'/><Cell N='Width' V='0.1968503937007874' F='GUARD(0.19685039370079DL)'/><Cell N='Height' V='-0.1968503937007874' F='GUARD(-0.19685039370079DL)'/><Cell N='LocPinX' V='0.09842519685039369' F='Inh'/><Cell N='LocPinY' V='-0.09842519685039369' F='Inh'/><Cell N='BeginX' V='0.0317007928410995' F='PAR(PNT(Sheet.157!Connections.X9,Sheet.157!Connections.Y9))'/><Cell N='BeginY' V='0.1848346773849903' F='PAR(PNT(Sheet.157!Connections.X9,Sheet.157!Connections.Y9))'/><Cell N='EndX' V='0.18483467738499' F='PAR(PNT(Sheet.157!Connections.X7,Sheet.157!Connections.Y7))'/><Cell N='EndY' V='0.03170079284109928' F='PAR(PNT(Sheet.157!Connections.X7,Sheet.157!Connections.Y7))'/><Cell N='LayerMember' V='0'/><Cell N='BegTrigger' V='2' F='_XFTRIGGER(Sheet.157!EventXFMod)'/><Cell N='EndTrigger' V='2' F='_XFTRIGGER(Sheet.157!EventXFMod)'/><Cell N='ShapeRouteStyle' V='16'/><Cell N='ConLineRouteExt' V='1'/><Cell N='TxtPinX' V='0.09842519927769902' F='Inh'/><Cell N='TxtPinY' V='-0.09842519927769902' F='Inh'/><Cell N='EndArrow' V='0'/><Section N='Control'><Row N='TextPosition'><Cell N='X' V='0.09842519927769902'/><Cell N='Y' V='-0.09842519927769902'/><Cell N='XDyn' V='0.09842519927769902' F='Inh'/><Cell N='YDyn' V='-0.09842519927769902' F='Inh'/></Row></Section><Section N='Geometry' IX='0'><Row T='MoveTo' IX='1'><Cell N='X' V='0.02185825457844842'/><Cell N='Y' V='-0.0218582545784482'/></Row><Row T='LineTo' IX='2'><Cell N='X' V='0.174992139122339'/><Cell N='Y' V='-0.1749921391223392'/></Row><Row T='LineTo' IX='3' Del='1'/></Section></Shape></Shapes></Shape><Shape ID='160' NameU='Dynamic connector.14' Name='Dynamic connector.14' Type='Shape' Master='5'><Cell N='PinX' V='1.1732593962207' U='MM' F='Inh'/><Cell N='PinY' V='4.952519581747628' F='Inh'/><Cell N='Width' V='0.5351223705732187' U='MM' F='GUARD(EndX-BeginX)'/><Cell N='Height' V='0.1968503937007874' F='GUARD(0.19685039370079DL)'/><Cell N='LocPinX' V='0.2675611852866093' U='MM' F='Inh'/><Cell N='LocPinY' V='0.09842519685039369' F='Inh'/><Cell N='BeginX' V='0.9056982109340908' F='PAR(PNT(Sheet.157!Connections.X5,Sheet.157!Connections.Y5))'/><Cell N='BeginY' V='4.952497058675551' F='PAR(PNT(Sheet.157!Connections.X5,Sheet.157!Connections.Y5))'/><Cell N='EndX' V='1.440820581507309' U='MM' F='PAR(PNT(Sheet.162!Connections.X3,Sheet.162!Connections.Y3))'/><Cell N='EndY' V='4.952542104819705' F='PAR(PNT(Sheet.162!Connections.X3,Sheet.162!Connections.Y3))'/><Cell N='LayerMember' V='0'/><Cell N='BegTrigger' V='2' F='_XFTRIGGER(Sheet.157!EventXFMod)'/><Cell N='EndTrigger' V='2' F='_XFTRIGGER(Sheet.162!EventXFMod)'/><Cell N='ConFixedCode' V='3'/><Cell N='TxtPinX' V='0.2675611972808838' F='Inh'/><Cell N='TxtPinY' V='0.09842519462108612' F='Inh'/><Cell N='EndArrow' V='0'/><Cell N='FillForegnd' V='#000000' F='Inh'/><Cell N='FillBkgnd' V='#ffffff' F='Inh'/><Cell N='ShdwForegnd' V='#000000' F='Inh'/><Cell N='ShapeShdwShow' V='2'/><Section N='Control'><Row N='TextPosition'><Cell N='X' V='0.2675611972808838'/><Cell N='Y' V='0.09842519462108612'/><Cell N='XDyn' V='0.2675611972808838' F='Inh'/><Cell N='YDyn' V='0.09842519462108612' F='Inh'/></Row></Section><Section N='Geometry' IX='0'><Row T='MoveTo' IX='1'><Cell N='Y' V='0.0984026737783168'/></Row><Row T='LineTo' IX='2'><Cell N='X' V='0.5351223705732195'/><Cell N='Y' V='0.09844771992247026'/></Row><Row T='LineTo' IX='3' Del='1'/></Section></Shape><Shape ID='161' Type='Group' LineStyle='8' FillStyle='8' TextStyle='8'><Cell N='PinX' V='1.549088316620355'/><Cell N='PinY' V='4.952542104819705'/><Cell N='Width' V='0.2165354702260904'/><Cell N='Height' V='0.2165354702260904'/><Cell N='LocPinX' V='0.1082677351130452' F='Width*0.5'/><Cell N='LocPinY' V='0.1082677351130452' F='Height*0.5'/><Cell N='Angle' V='0'/><Cell N='FlipX' V='0'/><Cell N='FlipY' V='0'/><Cell N='ResizeMode' V='0'/><Cell N='QuickStyleVariation' V='2'/><Cell N='ObjType' V='8'/><Cell N='ShapeShdwShow' V='2'/><Shapes><Shape ID='162' NameU='Circle' Name='圆形' Type='Shape' Master='9'><Cell N='PinX' V='0.1082677351130452' F='Sheet.161!Width*0.5'/><Cell N='PinY' V='0.1082677351130452' F='Sheet.161!Height*0.5'/><Cell N='Width' V='0.2165354702260904' F='Sheet.161!Width*1'/><Cell N='Height' V='0.2165354702260904' F='Sheet.161!Height*1'/><Cell N='LocPinX' V='0.1082677351130452' F='Inh'/><Cell N='LocPinY' V='0.1082677351130452' F='Inh'/><Cell N='TxtPinX' V='0.1082677351130452' F='Inh'/><Cell N='TxtPinY' V='0.1082677351130452' F='Inh'/><Cell N='TxtWidth' V='0.1894685364478291' F='Inh'/><Cell N='TxtHeight' V='0.1624016026695678' F='Inh'/><Cell N='TxtLocPinX' V='0.09473426822391456' F='Inh'/><Cell N='TxtLocPinY' V='0.08120080133478391' F='Inh'/><Cell N='ObjType' V='1'/><Section N='Connection'><Row T='Connection' IX='0'><Cell N='X' V='0.1082677351130452' F='Inh'/><Cell N='Y' V='0.2165354702260904' F='Inh'/></Row><Row T='Connection' IX='1'><Cell N='X' V='0.1082677351130452' F='Inh'/><Cell N='Y' V='0.1082677351130452' F='Inh'/></Row><Row T='Connection' IX='2'><Cell N='Y' V='0.1082677351130452' F='Inh'/></Row><Row T='Connection' IX='3'><Cell N='X' V='0.1082677351130452' F='Inh'/></Row><Row T='Connection' IX='4'><Cell N='X' V='0.2165354702260904' F='Inh'/><Cell N='Y' V='0.1082677351130452' F='Inh'/></Row><Row T='Connection' IX='5'><Cell N='X' V='0.03170079284109964' F='Inh'/><Cell N='Y' V='0.03170079284109964' F='Inh'/></Row><Row T='Connection' IX='6'><Cell N='X' V='0.1848346773849908' F='Inh'/><Cell N='Y' V='0.03170079284109964' F='Inh'/></Row><Row T='Connection' IX='7'><Cell N='X' V='0.1848346773849908' F='Inh'/><Cell N='Y' V='0.1848346773849908' F='Inh'/></Row><Row T='Connection' IX='8'><Cell N='X' V='0.03170079284109964' F='Inh'/><Cell N='Y' V='0.1848346773849908' F='Inh'/></Row></Section><Section N='Geometry' IX='0'><Row T='MoveTo' IX='1'><Cell N='Y' V='0.1082677351130452' F='Inh'/></Row><Row T='EllipticalArcTo' IX='2'><Cell N='X' V='0.2165354702260904' F='Inh'/><Cell N='Y' V='0.1082677351130452' F='Inh'/><Cell N='A' V='0.1082677351130452' U='DL' F='Inh'/><Cell N='B' V='0.2165354702260904' U='DL' F='Inh'/></Row><Row T='EllipticalArcTo' IX='3'><Cell N='Y' V='0.1082677351130452' F='Inh'/><Cell N='A' V='0.1082677351130452' U='DL' F='Inh'/></Row></Section></Shape><Shape ID='163' NameU='Dynamic connector.11' IsCustomNameU='1' Name='动态连接线.11' IsCustomName='1' Type='Shape' Master='5'><Cell N='PinX' V='0.1082677351130452' F='Inh'/><Cell N='PinY' V='0.1082677351130452' F='Inh'/><Cell N='Width' V='0.1968503937007874' F='GUARD(0.19685039370079DL)'/><Cell N='Height' V='0.1968503937007874' F='GUARD(0.19685039370079DL)'/><Cell N='LocPinX' V='0.09842519685039369' F='Inh'/><Cell N='LocPinY' V='0.09842519685039369' F='Inh'/><Cell N='BeginX' V='0.03170079284109972' F='PAR(PNT(Sheet.162!Connections.X6,Sheet.162!Connections.Y6))'/><Cell N='BeginY' V='0.03170079284109928' F='PAR(PNT(Sheet.162!Connections.X6,Sheet.162!Connections.Y6))'/><Cell N='EndX' V='0.1848346773849907' F='PAR(PNT(Sheet.162!Connections.X8,Sheet.162!Connections.Y8))'/><Cell N='EndY' V='0.1848346773849912' F='PAR(PNT(Sheet.162!Connections.X8,Sheet.162!Connections.Y8))'/><Cell N='LayerMember' V='0'/><Cell N='BegTrigger' V='2' F='_XFTRIGGER(Sheet.162!EventXFMod)'/><Cell N='EndTrigger' V='2' F='_XFTRIGGER(Sheet.162!EventXFMod)'/><Cell N='ShapeRouteStyle' V='16'/><Cell N='ConLineRouteExt' V='1'/><Cell N='TxtPinX' V='0.09842519927769901' F='Inh'/><Cell N='TxtPinY' V='0.09842519927769904' F='Inh'/><Cell N='EndArrow' V='0'/><Section N='Control'><Row N='TextPosition'><Cell N='X' V='0.09842519927769901'/><Cell N='Y' V='0.09842519927769904'/><Cell N='XDyn' V='0.09842519927769901' F='Inh'/><Cell N='YDyn' V='0.09842519927769904' F='Inh'/></Row></Section><Section N='Geometry' IX='0'><Row T='MoveTo' IX='1'><Cell N='X' V='0.0218582545784482'/><Cell N='Y' V='0.0218582545784482'/></Row><Row T='LineTo' IX='2'><Cell N='X' V='0.1749921391223392'/><Cell N='Y' V='0.1749921391223392'/></Row><Row T='LineTo' IX='3' Del='1'/></Section></Shape><Shape ID='164' NameU='Dynamic connector.12' IsCustomNameU='1' Name='动态连接线.12' IsCustomName='1' Type='Shape' Master='5'><Cell N='PinX' V='0.1082677351130452' F='Inh'/><Cell N='PinY' V='0.1082677351130452' F='Inh'/><Cell N='Width' V='0.1968503937007874' F='GUARD(0.19685039370079DL)'/><Cell N='Height' V='-0.1968503937007874' F='GUARD(-0.19685039370079DL)'/><Cell N='LocPinX' V='0.09842519685039369' F='Inh'/><Cell N='LocPinY' V='-0.09842519685039369' F='Inh'/><Cell N='BeginX' V='0.03170079284109972' F='PAR(PNT(Sheet.162!Connections.X9,Sheet.162!Connections.Y9))'/><Cell N='BeginY' V='0.1848346773849912' F='PAR(PNT(Sheet.162!Connections.X9,Sheet.162!Connections.Y9))'/><Cell N='EndX' V='0.1848346773849907' F='PAR(PNT(Sheet.162!Connections.X7,Sheet.162!Connections.Y7))'/><Cell N='EndY' V='0.03170079284109928' F='PAR(PNT(Sheet.162!Connections.X7,Sheet.162!Connections.Y7))'/><Cell N='LayerMember' V='0'/><Cell N='BegTrigger' V='2' F='_XFTRIGGER(Sheet.162!EventXFMod)'/><Cell N='EndTrigger' V='2' F='_XFTRIGGER(Sheet.162!EventXFMod)'/><Cell N='ShapeRouteStyle' V='16'/><Cell N='ConLineRouteExt' V='1'/><Cell N='TxtPinX' V='0.09842519927769904' F='Inh'/><Cell N='TxtPinY' V='-0.09842519927769904' F='Inh'/><Cell N='EndArrow' V='0'/><Section N='Control'><Row N='TextPosition'><Cell N='X' V='0.09842519927769904'/><Cell N='Y' V='-0.09842519927769901'/><Cell N='XDyn' V='0.09842519927769904' F='Inh'/><Cell N='YDyn' V='-0.09842519927769904' F='Inh'/></Row></Section><Section N='Geometry' IX='0'><Row T='MoveTo' IX='1'><Cell N='X' V='0.0218582545784482'/><Cell N='Y' V='-0.0218582545784482'/></Row><Row T='LineTo' IX='2'><Cell N='X' V='0.1749921391223392'/><Cell N='Y' V='-0.1749921391223392'/></Row><Row T='LineTo' IX='3' Del='1'/></Section></Shape></Shapes></Shape><Shape ID='165' NameU='Dynamic connector.19' Name='Dynamic connector.19' Type='Shape' Master='5'><Cell N='PinX' V='2.281838024389641' F='Inh'/><Cell N='PinY' V='4.950188421437561' F='Inh'/><Cell N='Width' V='1.248963945312481' F='GUARD(EndX-BeginX)'/><Cell N='Height' V='-0.1968503937007874' F='GUARD(-0.19685039370079DL)'/><Cell N='LocPinX' V='0.6244819726562405' F='Inh'/><Cell N='LocPinY' V='-0.09842519685039369' F='Inh'/><Cell N='BeginX' V='1.6573560517334' F='PAR(PNT(Sheet.162!Connections.X5,Sheet.162!Connections.Y5))'/><Cell N='BeginY' V='4.952542104819705' F='PAR(PNT(Sheet.162!Connections.X5,Sheet.162!Connections.Y5))'/><Cell N='EndX' V='2.906319997045881'/><Cell N='EndY' V='4.947834738055418'/><Cell N='LayerMember' V='0'/><Cell N='BegTrigger' V='2' F='_XFTRIGGER(Sheet.162!EventXFMod)'/><Cell N='EndTrigger' V='1' F='_XFTRIGGER(EventXFMod)'/><Cell N='TxtPinX' V='0.6244819760322586' F='Inh'/><Cell N='TxtPinY' V='-0.09842519462108659' F='Inh'/><Cell N='ConFixedCode' V='3'/><Cell N='FillForegnd' V='#000000' F='Inh'/><Cell N='FillBkgnd' V='#ffffff' F='Inh'/><Cell N='ShdwForegnd' V='#000000' F='Inh'/><Cell N='ShapeShdwShow' V='2'/><Section N='Control'><Row N='TextPosition'><Cell N='X' V='0.6244819760322586'/><Cell N='Y' V='-0.09842519462108659'/><Cell N='XDyn' V='0.6244819760322586' F='Inh'/><Cell N='YDyn' V='-0.09842519462108659' F='Inh'/></Row></Section><Section N='Geometry' IX='0'><Row T='MoveTo' IX='1'><Cell N='Y' V='-0.09607151346825038'/></Row><Row T='LineTo' IX='2'><Cell N='X' V='1.248963945312481'/><Cell N='Y' V='-0.1007788802325367'/></Row><Row T='LineTo' IX='3' Del='1'/></Section></Shape><Shape ID='166' Type='Group' LineStyle='8' FillStyle='8' TextStyle='8'><Cell N='PinX' V='2.473766996055249'/><Cell N='PinY' V='4.445866256968494'/><Cell N='Width' V='0.2165354702260887'/><Cell N='Height' V='0.2165354702260887'/><Cell N='LocPinX' V='0.1082677351130443' F='Width*0.5'/><Cell N='LocPinY' V='0.1082677351130443' F='Height*0.5'/><Cell N='Angle' V='0'/><Cell N='FlipX' V='0'/><Cell N='FlipY' V='0'/><Cell N='ResizeMode' V='0'/><Cell N='QuickStyleVariation' V='2'/><Cell N='ObjType' V='8'/><Cell N='ShapeShdwShow' V='2'/><Shapes><Shape ID='167' NameU='Circle' Name='圆形' Type='Shape' Master='9'><Cell N='PinX' V='0.1082677351130443' F='Sheet.166!Width*0.5'/><Cell N='PinY' V='0.1082677351130443' F='Sheet.166!Height*0.5'/><Cell N='Width' V='0.2165354702260887' F='Sheet.166!Width*1'/><Cell N='Height' V='0.2165354702260887' F='Sheet.166!Height*1'/><Cell N='LocPinX' V='0.1082677351130443' F='Inh'/><Cell N='LocPinY' V='0.1082677351130443' F='Inh'/><Cell N='TxtPinX' V='0.1082677351130443' F='Inh'/><Cell N='TxtPinY' V='0.1082677351130443' F='Inh'/><Cell N='TxtWidth' V='0.1894685364478276' F='Inh'/><Cell N='TxtHeight' V='0.1624016026695665' F='Inh'/><Cell N='TxtLocPinX' V='0.09473426822391379' F='Inh'/><Cell N='TxtLocPinY' V='0.08120080133478325' F='Inh'/><Cell N='ObjType' V='1'/><Section N='Connection'><Row T='Connection' IX='0'><Cell N='X' V='0.1082677351130443' F='Inh'/><Cell N='Y' V='0.2165354702260887' F='Inh'/></Row><Row T='Connection' IX='1'><Cell N='X' V='0.1082677351130443' F='Inh'/><Cell N='Y' V='0.1082677351130443' F='Inh'/></Row><Row T='Connection' IX='2'><Cell N='Y' V='0.1082677351130443' F='Inh'/></Row><Row T='Connection' IX='3'><Cell N='X' V='0.1082677351130443' F='Inh'/></Row><Row T='Connection' IX='4'><Cell N='X' V='0.2165354702260887' F='Inh'/><Cell N='Y' V='0.1082677351130443' F='Inh'/></Row><Row T='Connection' IX='5'><Cell N='X' V='0.03170079284109938' F='Inh'/><Cell N='Y' V='0.03170079284109938' F='Inh'/></Row><Row T='Connection' IX='6'><Cell N='X' V='0.1848346773849893' F='Inh'/><Cell N='Y' V='0.03170079284109938' F='Inh'/></Row><Row T='Connection' IX='7'><Cell N='X' V='0.1848346773849893' F='Inh'/><Cell N='Y' V='0.1848346773849893' F='Inh'/></Row><Row T='Connection' IX='8'><Cell N='X' V='0.03170079284109938' F='Inh'/><Cell N='Y' V='0.1848346773849893' F='Inh'/></Row></Section><Section N='Geometry' IX='0'><Row T='MoveTo' IX='1'><Cell N='Y' V='0.1082677351130443' F='Inh'/></Row><Row T='EllipticalArcTo' IX='2'><Cell N='X' V='0.2165354702260887' F='Inh'/><Cell N='Y' V='0.1082677351130443' F='Inh'/><Cell N='A' V='0.1082677351130443' U='DL' F='Inh'/><Cell N='B' V='0.2165354702260887' U='DL' F='Inh'/></Row><Row T='EllipticalArcTo' IX='3'><Cell N='Y' V='0.1082677351130443' F='Inh'/><Cell N='A' V='0.1082677351130443' U='DL' F='Inh'/></Row></Section></Shape><Shape ID='168' NameU='Dynamic connector.11' IsCustomNameU='1' Name='动态连接线.11' IsCustomName='1' Type='Shape' Master='5'><Cell N='PinX' V='0.1082677351130443' F='Inh'/><Cell N='PinY' V='0.1082677351130443' F='Inh'/><Cell N='Width' V='0.1968503937007874' F='GUARD(0.19685039370079DL)'/><Cell N='Height' V='0.1968503937007874' F='GUARD(0.19685039370079DL)'/><Cell N='LocPinX' V='0.09842519685039369' F='Inh'/><Cell N='LocPinY' V='0.09842519685039369' F='Inh'/><Cell N='BeginX' V='0.03170079284109928' F='PAR(PNT(Sheet.167!Connections.X6,Sheet.167!Connections.Y6))'/><Cell N='BeginY' V='0.03170079284109928' F='PAR(PNT(Sheet.167!Connections.X6,Sheet.167!Connections.Y6))'/><Cell N='EndX' V='0.1848346773849894' F='PAR(PNT(Sheet.167!Connections.X8,Sheet.167!Connections.Y8))'/><Cell N='EndY' V='0.1848346773849894' F='PAR(PNT(Sheet.167!Connections.X8,Sheet.167!Connections.Y8))'/><Cell N='LayerMember' V='0'/><Cell N='BegTrigger' V='2' F='_XFTRIGGER(Sheet.167!EventXFMod)'/><Cell N='EndTrigger' V='2' F='_XFTRIGGER(Sheet.167!EventXFMod)'/><Cell N='ShapeRouteStyle' V='16'/><Cell N='ConLineRouteExt' V='1'/><Cell N='TxtPinX' V='0.09842519927769901' F='Inh'/><Cell N='TxtPinY' V='0.09842519927769904' F='Inh'/><Cell N='EndArrow' V='0'/><Section N='Control'><Row N='TextPosition'><Cell N='X' V='0.09842519927769901'/><Cell N='Y' V='0.09842519927769904'/><Cell N='XDyn' V='0.09842519927769901' F='Inh'/><Cell N='YDyn' V='0.09842519927769904' F='Inh'/></Row></Section><Section N='Geometry' IX='0'><Row T='MoveTo' IX='1'><Cell N='X' V='0.02185825457844864'/><Cell N='Y' V='0.02185825457844864'/></Row><Row T='LineTo' IX='2'><Cell N='X' V='0.1749921391223387'/><Cell N='Y' V='0.1749921391223387'/></Row><Row T='LineTo' IX='3' Del='1'/></Section></Shape><Shape ID='169' NameU='Dynamic connector.12' IsCustomNameU='1' Name='动态连接线.12' IsCustomName='1' Type='Shape' Master='5'><Cell N='PinX' V='0.1082677351130443' F='Inh'/><Cell N='PinY' V='0.1082677351130443' F='Inh'/><Cell N='Width' V='0.1968503937007874' F='GUARD(0.19685039370079DL)'/><Cell N='Height' V='-0.1968503937007874' F='GUARD(-0.19685039370079DL)'/><Cell N='LocPinX' V='0.09842519685039369' F='Inh'/><Cell N='LocPinY' V='-0.09842519685039369' F='Inh'/><Cell N='BeginX' V='0.03170079284109928' F='PAR(PNT(Sheet.167!Connections.X9,Sheet.167!Connections.Y9))'/><Cell N='BeginY' V='0.1848346773849894' F='PAR(PNT(Sheet.167!Connections.X9,Sheet.167!Connections.Y9))'/><Cell N='EndX' V='0.1848346773849894' F='PAR(PNT(Sheet.167!Connections.X7,Sheet.167!Connections.Y7))'/><Cell N='EndY' V='0.03170079284109928' F='PAR(PNT(Sheet.167!Connections.X7,Sheet.167!Connections.Y7))'/><Cell N='LayerMember' V='0'/><Cell N='BegTrigger' V='2' F='_XFTRIGGER(Sheet.167!EventXFMod)'/><Cell N='EndTrigger' V='2' F='_XFTRIGGER(Sheet.167!EventXFMod)'/><Cell N='ShapeRouteStyle' V='16'/><Cell N='ConLineRouteExt' V='1'/><Cell N='TxtPinX' V='0.09842519927769904' F='Inh'/><Cell N='TxtPinY' V='-0.09842519927769904' F='Inh'/><Cell N='EndArrow' V='0'/><Section N='Control'><Row N='TextPosition'><Cell N='X' V='0.09842519927769904'/><Cell N='Y' V='-0.09842519927769901'/><Cell N='XDyn' V='0.09842519927769904' F='Inh'/><Cell N='YDyn' V='-0.09842519927769904' F='Inh'/></Row></Section><Section N='Geometry' IX='0'><Row T='MoveTo' IX='1'><Cell N='X' V='0.02185825457844864'/><Cell N='Y' V='-0.02185825457844864'/></Row><Row T='LineTo' IX='2'><Cell N='X' V='0.1749921391223387'/><Cell N='Y' V='-0.1749921391223387'/></Row><Row T='LineTo' IX='3' Del='1'/></Section></Shape></Shapes></Shape><Shape ID='170' Type='Group' LineStyle='8' FillStyle='8' TextStyle='8'><Cell N='PinX' V='1.549329958554702'/><Cell N='PinY' V='4.44586626932814'/><Cell N='Width' V='0.2165354702260901'/><Cell N='Height' V='0.21653547022609'/><Cell N='LocPinX' V='0.108267735113045' F='Width*0.5'/><Cell N='LocPinY' V='0.108267735113045' F='Height*0.5'/><Cell N='Angle' V='0'/><Cell N='FlipX' V='0'/><Cell N='FlipY' V='0'/><Cell N='ResizeMode' V='0'/><Cell N='QuickStyleVariation' V='2'/><Cell N='ObjType' V='8'/><Cell N='ShapeShdwShow' V='2'/><Shapes><Shape ID='171' NameU='Circle' Name='圆形' Type='Shape' Master='9'><Cell N='PinX' V='0.108267735113045' F='Sheet.170!Width*0.5'/><Cell N='PinY' V='0.108267735113045' F='Sheet.170!Height*0.5'/><Cell N='Width' V='0.21653547022609' F='Sheet.170!Width*1'/><Cell N='Height' V='0.21653547022609' F='Sheet.170!Height*1'/><Cell N='LocPinX' V='0.108267735113045' F='Inh'/><Cell N='LocPinY' V='0.108267735113045' F='Inh'/><Cell N='TxtPinX' V='0.108267735113045' F='Inh'/><Cell N='TxtPinY' V='0.108267735113045' F='Inh'/><Cell N='TxtWidth' V='0.1894685364478288' F='Inh'/><Cell N='TxtHeight' V='0.1624016026695676' F='Inh'/><Cell N='TxtLocPinX' V='0.0947342682239144' F='Inh'/><Cell N='TxtLocPinY' V='0.08120080133478377' F='Inh'/><Cell N='ObjType' V='1'/><Section N='Connection'><Row T='Connection' IX='0'><Cell N='X' V='0.108267735113045' F='Inh'/><Cell N='Y' V='0.21653547022609' F='Inh'/></Row><Row T='Connection' IX='1'><Cell N='X' V='0.108267735113045' F='Inh'/><Cell N='Y' V='0.108267735113045' F='Inh'/></Row><Row T='Connection' IX='2'><Cell N='Y' V='0.108267735113045' F='Inh'/></Row><Row T='Connection' IX='3'><Cell N='X' V='0.108267735113045' F='Inh'/></Row><Row T='Connection' IX='4'><Cell N='X' V='0.21653547022609' F='Inh'/><Cell N='Y' V='0.108267735113045' F='Inh'/></Row><Row T='Connection' IX='5'><Cell N='X' V='0.03170079284109958' F='Inh'/><Cell N='Y' V='0.03170079284109958' F='Inh'/></Row><Row T='Connection' IX='6'><Cell N='X' V='0.1848346773849905' F='Inh'/><Cell N='Y' V='0.03170079284109958' F='Inh'/></Row><Row T='Connection' IX='7'><Cell N='X' V='0.1848346773849905' F='Inh'/><Cell N='Y' V='0.1848346773849905' F='Inh'/></Row><Row T='Connection' IX='8'><Cell N='X' V='0.03170079284109958' F='Inh'/><Cell N='Y' V='0.1848346773849905' F='Inh'/></Row></Section><Section N='Geometry' IX='0'><Row T='MoveTo' IX='1'><Cell N='Y' V='0.108267735113045' F='Inh'/></Row><Row T='EllipticalArcTo' IX='2'><Cell N='X' V='0.21653547022609' F='Inh'/><Cell N='Y' V='0.108267735113045' F='Inh'/><Cell N='A' V='0.108267735113045' U='DL' F='Inh'/><Cell N='B' V='0.21653547022609' U='DL' F='Inh'/></Row><Row T='EllipticalArcTo' IX='3'><Cell N='Y' V='0.108267735113045' F='Inh'/><Cell N='A' V='0.108267735113045' U='DL' F='Inh'/></Row></Section></Shape><Shape ID='172' NameU='Dynamic connector.11' IsCustomNameU='1' Name='动态连接线.11' IsCustomName='1' Type='Shape' Master='5'><Cell N='PinX' V='0.108267735113045' F='Inh'/><Cell N='PinY' V='0.1082677351130448' F='Inh'/><Cell N='Width' V='0.1968503937007874' F='GUARD(0.19685039370079DL)'/><Cell N='Height' V='0.1968503937007874' F='GUARD(0.19685039370079DL)'/><Cell N='LocPinX' V='0.09842519685039369' F='Inh'/><Cell N='LocPinY' V='0.09842519685039369' F='Inh'/><Cell N='BeginX' V='0.0317007928410995' F='PAR(PNT(Sheet.171!Connections.X6,Sheet.171!Connections.Y6))'/><Cell N='BeginY' V='0.03170079284109928' F='PAR(PNT(Sheet.171!Connections.X6,Sheet.171!Connections.Y6))'/><Cell N='EndX' V='0.1848346773849905' F='PAR(PNT(Sheet.171!Connections.X8,Sheet.171!Connections.Y8))'/><Cell N='EndY' V='0.1848346773849903' F='PAR(PNT(Sheet.171!Connections.X8,Sheet.171!Connections.Y8))'/><Cell N='LayerMember' V='0'/><Cell N='BegTrigger' V='2' F='_XFTRIGGER(Sheet.171!EventXFMod)'/><Cell N='EndTrigger' V='2' F='_XFTRIGGER(Sheet.171!EventXFMod)'/><Cell N='ShapeRouteStyle' V='16'/><Cell N='ConLineRouteExt' V='1'/><Cell N='TxtPinX' V='0.09842519927769902' F='Inh'/><Cell N='TxtPinY' V='0.09842519927769902' F='Inh'/><Cell N='EndArrow' V='0'/><Section N='Control'><Row N='TextPosition'><Cell N='X' V='0.09842519927769902'/><Cell N='Y' V='0.09842519927769902'/><Cell N='XDyn' V='0.09842519927769902' F='Inh'/><Cell N='YDyn' V='0.09842519927769902' F='Inh'/></Row></Section><Section N='Geometry' IX='0'><Row T='MoveTo' IX='1'><Cell N='X' V='0.02185825457844842'/><Cell N='Y' V='0.0218582545784482'/></Row><Row T='LineTo' IX='2'><Cell N='X' V='0.174992139122339'/><Cell N='Y' V='0.1749921391223392'/></Row><Row T='LineTo' IX='3' Del='1'/></Section></Shape><Shape ID='173' NameU='Dynamic connector.12' IsCustomNameU='1' Name='动态连接线.12' IsCustomName='1' Type='Shape' Master='5'><Cell N='PinX' V='0.108267735113045' F='Inh'/><Cell N='PinY' V='0.1082677351130448' F='Inh'/><Cell N='Width' V='0.1968503937007874' F='GUARD(0.19685039370079DL)'/><Cell N='Height' V='-0.1968503937007874' F='GUARD(-0.19685039370079DL)'/><Cell N='LocPinX' V='0.09842519685039369' F='Inh'/><Cell N='LocPinY' V='-0.09842519685039369' F='Inh'/><Cell N='BeginX' V='0.0317007928410995' F='PAR(PNT(Sheet.171!Connections.X9,Sheet.171!Connections.Y9))'/><Cell N='BeginY' V='0.1848346773849903' F='PAR(PNT(Sheet.171!Connections.X9,Sheet.171!Connections.Y9))'/><Cell N='EndX' V='0.1848346773849905' F='PAR(PNT(Sheet.171!Connections.X7,Sheet.171!Connections.Y7))'/><Cell N='EndY' V='0.03170079284109928' F='PAR(PNT(Sheet.171!Connections.X7,Sheet.171!Connections.Y7))'/><Cell N='LayerMember' V='0'/><Cell N='BegTrigger' V='2' F='_XFTRIGGER(Sheet.171!EventXFMod)'/><Cell N='EndTrigger' V='2' F='_XFTRIGGER(Sheet.171!EventXFMod)'/><Cell N='ShapeRouteStyle' V='16'/><Cell N='ConLineRouteExt' V='1'/><Cell N='TxtPinX' V='0.09842519927769902' F='Inh'/><Cell N='TxtPinY' V='-0.09842519927769902' F='Inh'/><Cell N='EndArrow' V='0'/><Section N='Control'><Row N='TextPosition'><Cell N='X' V='0.09842519927769902'/><Cell N='Y' V='-0.09842519927769902'/><Cell N='XDyn' V='0.09842519927769902' F='Inh'/><Cell N='YDyn' V='-0.09842519927769902' F='Inh'/></Row></Section><Section N='Geometry' IX='0'><Row T='MoveTo' IX='1'><Cell N='X' V='0.02185825457844842'/><Cell N='Y' V='-0.0218582545784482'/></Row><Row T='LineTo' IX='2'><Cell N='X' V='0.174992139122339'/><Cell N='Y' V='-0.1749921391223392'/></Row><Row T='LineTo' IX='3' Del='1'/></Section></Shape></Shapes></Shape><Shape ID='174' NameU='Dynamic connector.36' Name='Dynamic connector.36' Type='Shape' Master='5'><Cell N='PinX' V='1.549209137587528' F='Inh'/><Cell N='PinY' V='4.699204187073923' U='MM' F='Inh'/><Cell N='Width' V='-0.1968503937007874' F='GUARD(-0.19685039370079DL)'/><Cell N='Height' V='0.2901403652654757' U='MM' F='GUARD(EndY-BeginY)'/><Cell N='LocPinX' V='-0.09842519685039369' F='Inh'/><Cell N='LocPinY' V='0.1450701826327379' U='MM' F='Inh'/><Cell N='BeginX' V='1.549329958554702' F='PAR(PNT(Sheet.171!Connections.X1,Sheet.171!Connections.Y1))'/><Cell N='BeginY' V='4.554134004441185' F='PAR(PNT(Sheet.171!Connections.X1,Sheet.171!Connections.Y1))'/><Cell N='EndX' V='1.549088316620355' F='PAR(PNT(Sheet.162!Connections.X4,Sheet.162!Connections.Y4))'/><Cell N='EndY' V='4.84427436970666' U='MM' F='PAR(PNT(Sheet.162!Connections.X4,Sheet.162!Connections.Y4))'/><Cell N='LayerMember' V='0'/><Cell N='BegTrigger' V='2' F='_XFTRIGGER(Sheet.171!EventXFMod)'/><Cell N='EndTrigger' V='2' F='_XFTRIGGER(Sheet.162!EventXFMod)'/><Cell N='TxtPinX' V='-0.09830437588321961' F='Inh'/><Cell N='TxtPinY' V='0.1451910035999113' F='Inh'/><Cell N='FillForegnd' V='#000000' F='Inh'/><Cell N='FillBkgnd' V='#ffffff' F='Inh'/><Cell N='ShdwForegnd' V='#000000' F='Inh'/><Cell N='ShapeShdwShow' V='2'/><Section N='Control'><Row N='TextPosition'><Cell N='X' V='-0.09830437588321983'/><Cell N='Y' V='0.1451910035999113'/><Cell N='XDyn' V='-0.09830437588321961' F='Inh'/><Cell N='YDyn' V='0.1451910035999113' F='Inh'/></Row></Section><Section N='Geometry' IX='0'><Row T='MoveTo' IX='1'><Cell N='X' V='-0.09830437588322005'/></Row><Row T='LineTo' IX='2'><Cell N='X' V='-0.09830437588322005'/><Cell N='Y' V='0.1476377952755907'/></Row><Row T='LineTo' IX='3'><Cell N='X' V='-0.09854601781756744'/><Cell N='Y' V='0.1476377952755907'/></Row><Row T='LineTo' IX='4'><Cell N='X' V='-0.09854601781756744'/><Cell N='Y' V='0.2901403652654748'/></Row></Section></Shape><Shape ID='175' NameU='Rectangle.48' Name='矩形.48' Type='Shape' Master='4'><Cell N='PinX' V='0.8000206344091501'/><Cell N='PinY' V='3.983267518107533'/><Cell N='Width' V='0.2165354702260904'/><Cell N='Height' V='0.23622047026656'/><Cell N='LocPinX' V='0.1082677351130452' F='Inh'/><Cell N='LocPinY' V='0.11811023513328' F='Inh'/><Cell N='ObjType' V='1'/><Cell N='ShapeShdwShow' V='2'/><Section N='Connection'><Row T='Connection' IX='0'><Cell N='X' V='0.1082677351130452' F='Inh'/></Row><Row T='Connection' IX='1'><Cell N='X' V='0.2165354702260904' F='Inh'/><Cell N='Y' V='0.11811023513328' F='Inh'/></Row><Row T='Connection' IX='2'><Cell N='X' V='0.1082677351130452' F='Inh'/><Cell N='Y' V='0.23622047026656' F='Inh'/></Row><Row T='Connection' IX='3'><Cell N='Y' V='0.11811023513328' F='Inh'/></Row><Row T='Connection' IX='4'><Cell N='X' V='0.1082677351130452' F='Inh'/><Cell N='Y' V='0.11811023513328' F='Inh'/></Row></Section><Section N='Geometry' IX='0'><Row T='LineTo' IX='2'><Cell N='X' V='0.2165354702260904' F='Inh'/></Row><Row T='LineTo' IX='3'><Cell N='X' V='0.2165354702260904' F='Inh'/><Cell N='Y' V='0.23622047026656' F='Inh'/></Row><Row T='LineTo' IX='4'><Cell N='Y' V='0.23622047026656' F='Inh'/></Row></Section></Shape><Shape ID='176' NameU='Dynamic connector.49' Name='动态连接线.49' Type='Shape' Master='5'><Cell N='PinX' V='0.798725555115098' F='Inh'/><Cell N='PinY' V='4.472803538401659' U='MM' F='Inh'/><Cell N='Width' V='-0.1968503937007874' F='GUARD(-0.19685039370079DL)'/><Cell N='Height' V='0.7428515703216938' U='MM' F='GUARD(EndY-BeginY)'/><Cell N='LocPinX' V='-0.09842519685039369' F='Inh'/><Cell N='LocPinY' V='0.3714257851608469' U='MM' F='Inh'/><Cell N='BeginX' V='0.8000206344091501' F='PAR(PNT(Sheet.175!Connections.X3,Sheet.175!Connections.Y3))'/><Cell N='BeginY' V='4.101377753240812' F='PAR(PNT(Sheet.175!Connections.X3,Sheet.175!Connections.Y3))'/><Cell N='EndX' V='0.797430475821046' F='PAR(PNT(Sheet.157!Connections.X4,Sheet.157!Connections.Y4))'/><Cell N='EndY' V='4.844229323562506' U='MM' F='PAR(PNT(Sheet.157!Connections.X4,Sheet.157!Connections.Y4))'/><Cell N='LayerMember' V='0'/><Cell N='BegTrigger' V='2' F='_XFTRIGGER(Sheet.175!EventXFMod)'/><Cell N='EndTrigger' V='2' F='_XFTRIGGER(Sheet.157!EventXFMod)'/><Cell N='TxtPinX' V='-0.09842519834637642' F='Inh'/><Cell N='TxtPinY' V='0.3714257776737213' F='Inh'/><Cell N='ConFixedCode' V='3'/><Cell N='FillForegnd' V='#000000' F='Inh'/><Cell N='FillBkgnd' V='#ffffff' F='Inh'/><Cell N='ShdwForegnd' V='#000000' F='Inh'/><Cell N='ShapeShdwShow' V='2'/><Section N='Control'><Row N='TextPosition'><Cell N='X' V='-0.09842519834637642'/><Cell N='Y' V='0.3714257776737213'/><Cell N='XDyn' V='-0.09842519834637642' F='Inh'/><Cell N='YDyn' V='0.3714257776737213' F='Inh'/></Row></Section><Section N='Geometry' IX='0'><Row T='MoveTo' IX='1'><Cell N='X' V='-0.09713011755634171'/></Row><Row T='LineTo' IX='2'><Cell N='X' V='-0.09972027614444579'/><Cell N='Y' V='0.7428515703216965'/></Row><Row T='LineTo' IX='3' Del='1'/></Section></Shape><Shape ID='177' NameU='Rectangle.53' Name='Rectangle.53' Type='Shape' Master='4'><Cell N='PinX' V='1.190440607773515'/><Cell N='PinY' V='3.983267518107532'/><Cell N='Width' V='0.2165354702260904'/><Cell N='Height' V='0.23622047026656'/><Cell N='LocPinX' V='0.1082677351130452' F='Inh'/><Cell N='LocPinY' V='0.11811023513328' F='Inh'/><Cell N='ObjType' V='1'/><Cell N='ShapeShdwShow' V='2'/><Section N='Connection'><Row T='Connection' IX='0'><Cell N='X' V='0.1082677351130452' F='Inh'/></Row><Row T='Connection' IX='1'><Cell N='X' V='0.2165354702260904' F='Inh'/><Cell N='Y' V='0.11811023513328' F='Inh'/></Row><Row T='Connection' IX='2'><Cell N='X' V='0.1082677351130452' F='Inh'/><Cell N='Y' V='0.23622047026656' F='Inh'/></Row><Row T='Connection' IX='3'><Cell N='Y' V='0.11811023513328' F='Inh'/></Row><Row T='Connection' IX='4'><Cell N='X' V='0.1082677351130452' F='Inh'/><Cell N='Y' V='0.11811023513328' F='Inh'/></Row></Section><Section N='Geometry' IX='0'><Row T='LineTo' IX='2'><Cell N='X' V='0.2165354702260904' F='Inh'/></Row><Row T='LineTo' IX='3'><Cell N='X' V='0.2165354702260904' F='Inh'/><Cell N='Y' V='0.23622047026656' F='Inh'/></Row><Row T='LineTo' IX='4'><Cell N='Y' V='0.23622047026656' F='Inh'/></Row></Section></Shape><Shape ID='178' NameU='Rectangle.56' Name='Rectangle.56' Type='Shape' Master='4'><Cell N='PinX' V='1.5493645149973'/><Cell N='PinY' V='3.983267518107532'/><Cell N='Width' V='0.3468503937007874'/><Cell N='Height' V='0.23622047026656'/><Cell N='LocPinX' V='0.1734251968503937' F='Inh'/><Cell N='LocPinY' V='0.11811023513328' F='Inh'/><Cell N='ObjType' V='1'/><Cell N='ShapeShdwShow' V='2'/><Section N='Connection'><Row T='Connection' IX='0'><Cell N='X' V='0.1734251968503937' F='Inh'/></Row><Row T='Connection' IX='1'><Cell N='X' V='0.3468503937007874' F='Inh'/><Cell N='Y' V='0.11811023513328' F='Inh'/></Row><Row T='Connection' IX='2'><Cell N='X' V='0.1734251968503937' F='Inh'/><Cell N='Y' V='0.23622047026656' F='Inh'/></Row><Row T='Connection' IX='3'><Cell N='Y' V='0.11811023513328' F='Inh'/></Row><Row T='Connection' IX='4'><Cell N='X' V='0.1734251968503937' F='Inh'/><Cell N='Y' V='0.11811023513328' F='Inh'/></Row></Section><Section N='Geometry' IX='0'><Row T='LineTo' IX='2'><Cell N='X' V='0.3468503937007874' F='Inh'/></Row><Row T='LineTo' IX='3'><Cell N='X' V='0.3468503937007874' F='Inh'/><Cell N='Y' V='0.23622047026656' F='Inh'/></Row><Row T='LineTo' IX='4'><Cell N='Y' V='0.23622047026656' F='Inh'/></Row></Section></Shape><Shape ID='179' NameU='Rectangle.58' Name='Rectangle.58' Type='Shape' Master='4'><Cell N='PinX' V='2.05002066439869'/><Cell N='PinY' V='3.983267518107532'/><Cell N='Width' V='0.2165354702260904'/><Cell N='Height' V='0.23622047026656'/><Cell N='LocPinX' V='0.1082677351130452' F='Inh'/><Cell N='LocPinY' V='0.11811023513328' F='Inh'/><Cell N='ObjType' V='1'/><Cell N='ShapeShdwShow' V='2'/><Section N='Connection'><Row T='Connection' IX='0'><Cell N='X' V='0.1082677351130452' F='Inh'/></Row><Row T='Connection' IX='1'><Cell N='X' V='0.2165354702260904' F='Inh'/><Cell N='Y' V='0.11811023513328' F='Inh'/></Row><Row T='Connection' IX='2'><Cell N='X' V='0.1082677351130452' F='Inh'/><Cell N='Y' V='0.23622047026656' F='Inh'/></Row><Row T='Connection' IX='3'><Cell N='Y' V='0.11811023513328' F='Inh'/></Row><Row T='Connection' IX='4'><Cell N='X' V='0.1082677351130452' F='Inh'/><Cell N='Y' V='0.11811023513328' F='Inh'/></Row></Section><Section N='Geometry' IX='0'><Row T='LineTo' IX='2'><Cell N='X' V='0.2165354702260904' F='Inh'/></Row><Row T='LineTo' IX='3'><Cell N='X' V='0.2165354702260904' F='Inh'/><Cell N='Y' V='0.23622047026656' F='Inh'/></Row><Row T='LineTo' IX='4'><Cell N='Y' V='0.23622047026656' F='Inh'/></Row></Section></Shape><Shape ID='180' NameU='Dynamic connector.59' Name='Dynamic connector.59' Type='Shape' Master='5'><Cell N='PinX' V='1.315751415607586' U='MM' F='Inh'/><Cell N='PinY' V='4.273622011284475' F='Inh'/><Cell N='Width' V='0.2506216156681422' U='MM' F='GUARD(EndX-BeginX)'/><Cell N='Height' V='0.3444885160873286' F='GUARD(EndY-BeginY)'/><Cell N='LocPinX' V='0.1253108078340712' U='MM' F='Inh'/><Cell N='LocPinY' V='0.1722442580436643' F='Inh'/><Cell N='BeginX' V='1.190440607773515' F='PAR(PNT(Sheet.177!Connections.X3,Sheet.177!Connections.Y3))'/><Cell N='BeginY' V='4.101377753240811' F='PAR(PNT(Sheet.177!Connections.X3,Sheet.177!Connections.Y3))'/><Cell N='EndX' V='1.441062223441657' U='MM' F='PAR(PNT(Sheet.171!Connections.X3,Sheet.171!Connections.Y3))'/><Cell N='EndY' V='4.44586626932814' F='PAR(PNT(Sheet.171!Connections.X3,Sheet.171!Connections.Y3))'/><Cell N='LayerMember' V='0'/><Cell N='BegTrigger' V='2' F='_XFTRIGGER(Sheet.177!EventXFMod)'/><Cell N='EndTrigger' V='2' F='_XFTRIGGER(Sheet.171!EventXFMod)'/><Cell N='TxtPinY' V='0.2975550658777355' F='Inh'/><Cell N='FillForegnd' V='#000000' F='Inh'/><Cell N='FillBkgnd' V='#ffffff' F='Inh'/><Cell N='ShdwForegnd' V='#000000' F='Inh'/><Cell N='ShapeShdwShow' V='2'/><Section N='Control'><Row N='TextPosition'><Cell N='Y' V='0.2975550658777352'/><Cell N='YDyn' V='0.2975550658777355' F='Inh'/></Row></Section><Section N='Geometry' IX='0'><Row T='LineTo' IX='2'><Cell N='Y' V='0.3444885160873286'/></Row><Row T='LineTo' IX='3'><Cell N='X' V='0.2506216156681416'/><Cell N='Y' V='0.3444885160873286'/></Row></Section></Shape><Shape ID='181' NameU='Dynamic connector.60' Name='Dynamic connector.60' Type='Shape' Master='5'><Cell N='PinX' V='1.549347236776001' F='Inh'/><Cell N='PinY' V='4.219488143727953' U='MM' F='Inh'/><Cell N='Width' V='-0.1968503937007874' F='GUARD(-0.19685039370079DL)'/><Cell N='Height' V='0.2362207809742838' U='MM' F='GUARD(EndY-BeginY)'/><Cell N='LocPinX' V='-0.09842519685039369' F='Inh'/><Cell N='LocPinY' V='0.1181103904871419' U='MM' F='Inh'/><Cell N='BeginX' V='1.5493645149973' F='PAR(PNT(Sheet.178!Connections.X3,Sheet.178!Connections.Y3))'/><Cell N='BeginY' V='4.101377753240811' F='PAR(PNT(Sheet.178!Connections.X3,Sheet.178!Connections.Y3))'/><Cell N='EndX' V='1.549329958554702' F='PAR(PNT(Sheet.171!Connections.X4,Sheet.171!Connections.Y4))'/><Cell N='EndY' V='4.337598534215095' U='MM' F='PAR(PNT(Sheet.171!Connections.X4,Sheet.171!Connections.Y4))'/><Cell N='LayerMember' V='0'/><Cell N='BegTrigger' V='2' F='_XFTRIGGER(Sheet.178!EventXFMod)'/><Cell N='EndTrigger' V='2' F='_XFTRIGGER(Sheet.171!EventXFMod)'/><Cell N='TxtPinX' V='-0.09844247507169235' F='Inh'/><Cell N='TxtPinY' V='0.1180931122658433' F='Inh'/><Cell N='EndArrow' V='0'/><Cell N='FillForegnd' V='#000000' F='Inh'/><Cell N='FillBkgnd' V='#ffffff' F='Inh'/><Cell N='ShdwForegnd' V='#000000' F='Inh'/><Cell N='ShapeShdwShow' V='2'/><Section N='Control'><Row N='TextPosition'><Cell N='X' V='-0.09844247507169213'/><Cell N='Y' V='0.1180931122658435'/><Cell N='XDyn' V='-0.09844247507169235' F='Inh'/><Cell N='YDyn' V='0.1180931122658433' F='Inh'/></Row></Section><Section N='Geometry' IX='0'><Row T='MoveTo' IX='1'><Cell N='X' V='-0.09840791862909515'/></Row><Row T='LineTo' IX='2'><Cell N='X' V='-0.09840791862909515'/><Cell N='Y' V='0.07381889763779537'/></Row><Row T='LineTo' IX='3'><Cell N='X' V='-0.09844247507169235'/><Cell N='Y' V='0.07381889763779537'/></Row><Row T='LineTo' IX='4'><Cell N='X' V='-0.09844247507169235'/><Cell N='Y' V='0.2362207809742838'/></Row></Section></Shape><Shape ID='182' NameU='Rectangle.61' Name='Rectangle.61' Type='Shape' Master='4'><Cell N='PinX' V='2.47324898760777'/><Cell N='PinY' V='4.770669173858718'/><Cell N='Width' V='0.3641732054200788'/><Cell N='Height' V='0.23622047026656'/><Cell N='LocPinX' V='0.1820866027100394' F='Inh'/><Cell N='LocPinY' V='0.11811023513328' F='Inh'/><Cell N='ObjType' V='1'/><Cell N='ShapeShdwShow' V='2'/><Section N='Connection'><Row T='Connection' IX='0'><Cell N='X' V='0.1820866027100394' F='Inh'/></Row><Row T='Connection' IX='1'><Cell N='X' V='0.3641732054200788' F='Inh'/><Cell N='Y' V='0.11811023513328' F='Inh'/></Row><Row T='Connection' IX='2'><Cell N='X' V='0.1820866027100394' F='Inh'/><Cell N='Y' V='0.23622047026656' F='Inh'/></Row><Row T='Connection' IX='3'><Cell N='Y' V='0.11811023513328' F='Inh'/></Row><Row T='Connection' IX='4'><Cell N='X' V='0.1820866027100394' F='Inh'/><Cell N='Y' V='0.11811023513328' F='Inh'/></Row></Section><Section N='Geometry' IX='0'><Row T='LineTo' IX='2'><Cell N='X' V='0.3641732054200788' F='Inh'/></Row><Row T='LineTo' IX='3'><Cell N='X' V='0.3641732054200788' F='Inh'/><Cell N='Y' V='0.23622047026656' F='Inh'/></Row><Row T='LineTo' IX='4'><Cell N='Y' V='0.23622047026656' F='Inh'/></Row></Section></Shape><Shape ID='183' NameU='Dynamic connector.62' Name='Dynamic connector.62' Type='Shape' Master='5'><Cell N='PinX' V='2.207759962670448' U='MM' F='Inh'/><Cell N='PinY' V='4.273622005104652' F='Inh'/><Cell N='Width' V='0.3154785965435152' U='MM' F='GUARD(EndX-BeginX)'/><Cell N='Height' V='0.3444885037276828' F='GUARD(EndY-BeginY)'/><Cell N='LocPinX' V='0.1577392982717576' U='MM' F='Inh'/><Cell N='LocPinY' V='0.1722442518638414' F='Inh'/><Cell N='BeginX' V='2.05002066439869' F='PAR(PNT(Sheet.179!Connections.X3,Sheet.179!Connections.Y3))'/><Cell N='BeginY' V='4.101377753240811' F='PAR(PNT(Sheet.179!Connections.X3,Sheet.179!Connections.Y3))'/><Cell N='EndX' V='2.365499260942205' U='MM' F='PAR(PNT(Sheet.167!Connections.X3,Sheet.167!Connections.Y3))'/><Cell N='EndY' V='4.445866256968494' F='PAR(PNT(Sheet.167!Connections.X3,Sheet.167!Connections.Y3))'/><Cell N='LayerMember' V='0'/><Cell N='BegTrigger' V='2' F='_XFTRIGGER(Sheet.179!EventXFMod)'/><Cell N='EndTrigger' V='2' F='_XFTRIGGER(Sheet.167!EventXFMod)'/><Cell N='TxtPinY' V='0.3299835501355978' F='Inh'/><Cell N='FillForegnd' V='#000000' F='Inh'/><Cell N='FillBkgnd' V='#ffffff' F='Inh'/><Cell N='ShdwForegnd' V='#000000' F='Inh'/><Cell N='ShapeShdwShow' V='2'/><Section N='Control'><Row N='TextPosition'><Cell N='Y' V='0.3299835501355976'/><Cell N='YDyn' V='0.3299835501355978' F='Inh'/></Row></Section><Section N='Geometry' IX='0'><Row T='LineTo' IX='2'><Cell N='Y' V='0.3444885037276828'/></Row><Row T='LineTo' IX='3'><Cell N='X' V='0.3154785965435139'/><Cell N='Y' V='0.3444885037276828'/></Row></Section></Shape><Shape ID='184' NameU='Dynamic connector.63' Name='Dynamic connector.63' Type='Shape' Master='5'><Cell N='PinX' V='2.47350799183151' F='Inh'/><Cell N='PinY' V='4.603346465403488' U='MM' F='Inh'/><Cell N='Width' V='-0.1968503937007874' F='GUARD(-0.19685039370079DL)'/><Cell N='Height' V='0.1968503937007874' F='GUARD(0.19685039370079DL)'/><Cell N='LocPinX' V='-0.09842519685039369' F='Inh'/><Cell N='LocPinY' V='0.09842519685039369' F='Inh'/><Cell N='BeginX' V='2.473766996055249' F='PAR(PNT(Sheet.167!Connections.X1,Sheet.167!Connections.Y1))'/><Cell N='BeginY' V='4.554133992081539' F='PAR(PNT(Sheet.167!Connections.X1,Sheet.167!Connections.Y1))'/><Cell N='EndX' V='2.47324898760777' F='PAR(PNT(Sheet.182!Connections.X1,Sheet.182!Connections.Y1))'/><Cell N='EndY' V='4.652558938725439' U='MM' F='PAR(PNT(Sheet.182!Connections.X1,Sheet.182!Connections.Y1))'/><Cell N='LayerMember' V='0'/><Cell N='BegTrigger' V='2' F='_XFTRIGGER(Sheet.167!EventXFMod)'/><Cell N='EndTrigger' V='2' F='_XFTRIGGER(Sheet.182!EventXFMod)'/><Cell N='TxtPinX' V='-0.09868420107413511' F='Inh'/><Cell N='TxtPinY' V='0.0981661926266538' F='Inh'/><Cell N='EndArrow' V='0'/><Cell N='FillForegnd' V='#000000' F='Inh'/><Cell N='FillBkgnd' V='#ffffff' F='Inh'/><Cell N='ShdwForegnd' V='#000000' F='Inh'/><Cell N='ShapeShdwShow' V='2'/><Section N='Control'><Row N='TextPosition'><Cell N='X' V='-0.09868420107413423'/><Cell N='Y' V='0.09816619262665424'/><Cell N='XDyn' V='-0.09868420107413511' F='Inh'/><Cell N='YDyn' V='0.0981661926266538' F='Inh'/></Row></Section><Section N='Geometry' IX='0'><Row T='MoveTo' IX='1'><Cell N='X' V='-0.09816619262665416'/><Cell N='Y' V='0.04921272352844408'/></Row><Row T='LineTo' IX='2'><Cell N='X' V='-0.09816619262665416'/><Cell N='Y' V='0.08612217234734132'/></Row><Row T='LineTo' IX='3'><Cell N='X' V='-0.09868420107413289'/><Cell N='Y' V='0.08612217234734132'/></Row><Row T='LineTo' IX='4'><Cell N='X' V='-0.09868420107413289'/><Cell N='Y' V='0.1476376701723439'/></Row></Section></Shape><Shape ID='185' NameU='Dynamic connector.64' Name='Dynamic connector.64' Type='Shape' Master='5'><Cell N='PinX' V='0.8001847365872239' F='Inh'/><Cell N='PinY' V='3.657152112404071' F='Inh'/><Cell N='Width' V='0.1968503937007874' F='GUARD(0.19685039370079DL)'/><Cell N='Height' V='-0.1968503937007874' F='GUARD(-0.19685039370079DL)'/><Cell N='LocPinX' V='0.09842519685039369' F='Inh'/><Cell N='LocPinY' V='-0.09842519685039369' F='Inh'/><Cell N='BeginX' V='0.8000207075143875'/><Cell N='BeginY' V='3.707677046787273'/><Cell N='EndX' V='0.8003487656600603' F='PAR(PNT(Sheet.192!Connections.X1,Sheet.192!Connections.Y1))'/><Cell N='EndY' V='3.606627178020869' F='PAR(PNT(Sheet.192!Connections.X1,Sheet.192!Connections.Y1))'/><Cell N='LayerMember' V='0'/><Cell N='BegTrigger' V='1' F='_XFTRIGGER(EventXFMod)'/><Cell N='EndTrigger' V='2' F='_XFTRIGGER(Sheet.192!EventXFMod)'/><Cell N='ConFixedCode' V='3'/><Cell N='TxtPinX' V='0.09842519834637642' F='Inh'/><Cell N='TxtPinY' V='-0.09842519648373116' F='Inh'/><Cell N='EndArrow' V='0'/><Cell N='FillForegnd' V='#000000' F='Inh'/><Cell N='FillBkgnd' V='#ffffff' F='Inh'/><Cell N='ShdwForegnd' V='#000000' F='Inh'/><Cell N='ShapeShdwShow' V='2'/><Section N='Control'><Row N='TextPosition'><Cell N='X' V='0.09842519834637642'/><Cell N='Y' V='-0.09842519648373116'/><Cell N='XDyn' V='0.09842519834637642' F='Inh'/><Cell N='YDyn' V='-0.09842519648373116' F='Inh'/></Row></Section><Section N='Geometry' IX='0'><Row T='MoveTo' IX='1'><Cell N='X' V='0.09826116777755867'/><Cell N='Y' V='-0.04790026246719137'/></Row><Row T='LineTo' IX='2'><Cell N='X' V='0.09858922592322883'/><Cell N='Y' V='-0.1489501312335957'/></Row><Row T='LineTo' IX='3' Del='1'/></Section></Shape><Shape ID='186' NameU='Dynamic connector.65' Name='Dynamic connector.65' Type='Shape' Master='5'><Cell N='PinX' V='0.6720679214792713' F='Inh'/><Cell N='PinY' V='3.784627431974591' F='Inh'/><Cell N='Width' V='0.2559054258597664' F='GUARD(EndX-BeginX)'/><Cell N='Height' V='0.1968503937007874' F='GUARD(0.19685039370079DL)'/><Cell N='LocPinX' V='0.1279527129298812' F='Inh'/><Cell N='LocPinY' V='0.09842519685039369' F='Inh'/><Cell N='BeginX' V='0.5441152085493881'/><Cell N='BeginY' V='3.709824410515679'/><Cell N='EndX' V='0.8000206344091545'/><Cell N='EndY' V='3.859430453433504'/><Cell N='LayerMember' V='0'/><Cell N='BegTrigger' V='1' F='_XFTRIGGER(EventXFMod)'/><Cell N='EndTrigger' V='1' F='_XFTRIGGER(EventXFMod)'/><Cell N='ConFixedCode' V='3'/><Cell N='TxtPinX' V='0.2027557343887979' F='Inh'/><Cell N='TxtPinY' V='0.02362217539147721' F='Inh'/><Cell N='EndArrow' V='0'/><Cell N='FillForegnd' V='#000000' F='Inh'/><Cell N='FillBkgnd' V='#ffffff' F='Inh'/><Cell N='ShdwForegnd' V='#000000' F='Inh'/><Cell N='ShapeShdwShow' V='2'/><Section N='Control'><Row N='TextPosition'><Cell N='X' V='0.2027557343887978'/><Cell N='Y' V='0.02362217539147738'/><Cell N='XDyn' V='0.2027557343887979' F='Inh'/><Cell N='YDyn' V='0.02362217539147721' F='Inh'/></Row></Section><Section N='Geometry' IX='0'><Row T='MoveTo' IX='1'><Cell N='Y' V='0.02362217539147915'/></Row><Row T='LineTo' IX='2'><Cell N='X' V='0.2559054258597642'/><Cell N='Y' V='0.02362217539147915'/></Row><Row T='LineTo' IX='3'><Cell N='X' V='0.2559054258597642'/><Cell N='Y' V='0.1732282183093084'/></Row></Section></Shape><Shape ID='187' NameU='Dynamic connector.66' Name='Dynamic connector.66' Type='Shape' Master='5'><Cell N='PinX' V='0.9853881256898729' F='Inh'/><Cell N='PinY' V='3.78641726303312' U='MM' F='Inh'/><Cell N='Width' V='0.4101049641672838' F='GUARD(EndX-BeginX)'/><Cell N='Height' V='0.1968503937007874' F='GUARD(0.19685039370079DL)'/><Cell N='LocPinX' V='0.2050524820836419' F='Inh'/><Cell N='LocPinY' V='0.09842519685039369' F='Inh'/><Cell N='BeginX' V='0.780335643606231'/><Cell N='BeginY' V='3.707677243091988'/><Cell N='EndX' V='1.190440607773515' F='PAR(PNT(Sheet.177!Connections.X1,Sheet.177!Connections.Y1))'/><Cell N='EndY' V='3.865157282974252' U='MM' F='PAR(PNT(Sheet.177!Connections.X1,Sheet.177!Connections.Y1))'/><Cell N='LayerMember' V='0'/><Cell N='BegTrigger' V='1' F='_XFTRIGGER(EventXFMod)'/><Cell N='EndTrigger' V='2' F='_XFTRIGGER(Sheet.177!EventXFMod)'/><Cell N='ConFixedCode' V='3'/><Cell N='TxtPinX' V='0.2837925020247741' F='Inh'/><Cell N='TxtPinY' V='0.01968517690926586' F='Inh'/><Cell N='EndArrow' V='0'/><Cell N='FillForegnd' V='#000000' F='Inh'/><Cell N='FillBkgnd' V='#ffffff' F='Inh'/><Cell N='ShdwForegnd' V='#000000' F='Inh'/><Cell N='ShapeShdwShow' V='2'/><Section N='Control'><Row N='TextPosition'><Cell N='X' V='0.283792502024774'/><Cell N='Y' V='0.01968517690926586'/><Cell N='XDyn' V='0.2837925020247741' F='Inh'/><Cell N='YDyn' V='0.01968517690926586' F='Inh'/></Row></Section><Section N='Geometry' IX='0'><Row T='MoveTo' IX='1'><Cell N='Y' V='0.01968517690926364'/></Row><Row T='LineTo' IX='2'><Cell N='X' V='0.4101049641672887'/><Cell N='Y' V='0.01968517690926364'/></Row><Row T='LineTo' IX='3'><Cell N='X' V='0.4101049641672887'/><Cell N='Y' V='0.1771652167915239'/></Row></Section></Shape><Shape ID='188' NameU='Dynamic connector.67' Name='Dynamic connector.67' Type='Shape' Master='5'><Cell N='PinX' V='1.369902561385405' F='Inh'/><Cell N='PinY' V='3.786417164880762' U='MM' F='Inh'/><Cell N='Width' V='0.3589239072237889' F='GUARD(EndX-BeginX)'/><Cell N='Height' V='0.1968503937007874' F='GUARD(0.19685039370079DL)'/><Cell N='LocPinX' V='0.1794619536118944' F='Inh'/><Cell N='LocPinY' V='0.09842519685039369' F='Inh'/><Cell N='BeginX' V='1.190440607773511'/><Cell N='BeginY' V='3.707677046787273'/><Cell N='EndX' V='1.5493645149973' F='PAR(PNT(Sheet.178!Connections.X1,Sheet.178!Connections.Y1))'/><Cell N='EndY' V='3.865157282974252' U='MM' F='PAR(PNT(Sheet.178!Connections.X1,Sheet.178!Connections.Y1))'/><Cell N='LayerMember' V='0'/><Cell N='BegTrigger' V='1' F='_XFTRIGGER(EventXFMod)'/><Cell N='EndTrigger' V='2' F='_XFTRIGGER(Sheet.178!EventXFMod)'/><Cell N='ConFixedCode' V='3'/><Cell N='TxtPinX' V='0.2582020717053806' F='Inh'/><Cell N='TxtPinY' V='0.01968507875690495' F='Inh'/><Cell N='EndArrow' V='0'/><Cell N='FillForegnd' V='#000000' F='Inh'/><Cell N='FillBkgnd' V='#ffffff' F='Inh'/><Cell N='ShdwForegnd' V='#000000' F='Inh'/><Cell N='ShapeShdwShow' V='2'/><Section N='Control'><Row N='TextPosition'><Cell N='X' V='0.2582020717053807'/><Cell N='Y' V='0.0196850787569049'/><Cell N='XDyn' V='0.2582020717053806' F='Inh'/><Cell N='YDyn' V='0.01968507875690495' F='Inh'/></Row></Section><Section N='Geometry' IX='0'><Row T='MoveTo' IX='1'><Cell N='Y' V='0.01968507875690451'/></Row><Row T='LineTo' IX='2'><Cell N='X' V='0.3589239072237849'/><Cell N='Y' V='0.01968507875690451'/></Row><Row T='LineTo' IX='3'><Cell N='X' V='0.3589239072237849'/><Cell N='Y' V='0.177165314943883'/></Row></Section></Shape><Shape ID='189' NameU='Dynamic connector.68' Name='Dynamic connector.68' Type='Shape' Master='5'><Cell N='PinX' V='1.799040772763803' F='Inh'/><Cell N='PinY' V='3.786417164880762' U='MM' F='Inh'/><Cell N='Width' V='0.5019597832697742' F='GUARD(EndX-BeginX)'/><Cell N='Height' V='0.1968503937007874' F='GUARD(0.19685039370079DL)'/><Cell N='LocPinX' V='0.2509798916348871' F='Inh'/><Cell N='LocPinY' V='0.09842519685039369' F='Inh'/><Cell N='BeginX' V='1.548060881128916'/><Cell N='BeginY' V='3.707677046787273'/><Cell N='EndX' V='2.05002066439869' F='PAR(PNT(Sheet.179!Connections.X1,Sheet.179!Connections.Y1))'/><Cell N='EndY' V='3.865157282974252' U='MM' F='PAR(PNT(Sheet.179!Connections.X1,Sheet.179!Connections.Y1))'/><Cell N='LayerMember' V='0'/><Cell N='BegTrigger' V='1' F='_XFTRIGGER(EventXFMod)'/><Cell N='EndTrigger' V='2' F='_XFTRIGGER(Sheet.179!EventXFMod)'/><Cell N='ConFixedCode' V='3'/><Cell N='TxtPinX' V='0.3297200097283777' F='Inh'/><Cell N='TxtPinY' V='0.01968507875690495' F='Inh'/><Cell N='EndArrow' V='0'/><Cell N='FillForegnd' V='#000000' F='Inh'/><Cell N='FillBkgnd' V='#ffffff' F='Inh'/><Cell N='ShdwForegnd' V='#000000' F='Inh'/><Cell N='ShapeShdwShow' V='2'/><Section N='Control'><Row N='TextPosition'><Cell N='X' V='0.3297200097283777'/><Cell N='Y' V='0.0196850787569049'/><Cell N='XDyn' V='0.3297200097283777' F='Inh'/><Cell N='YDyn' V='0.01968507875690495' F='Inh'/></Row></Section><Section N='Geometry' IX='0'><Row T='MoveTo' IX='1'><Cell N='Y' V='0.01968507875690451'/></Row><Row T='LineTo' IX='2'><Cell N='X' V='0.5019597832697755'/><Cell N='Y' V='0.01968507875690451'/></Row><Row T='LineTo' IX='3'><Cell N='X' V='0.5019597832697755'/><Cell N='Y' V='0.177165314943883'/></Row></Section></Shape><Shape ID='190' NameU='Dynamic connector.69' Name='Dynamic connector.69' Type='Shape' Master='5'><Cell N='PinX' V='2.473248987607773' F='Inh'/><Cell N='PinY' V='4.920275471984124' F='Inh'/><Cell N='Width' V='0.1968503937007874' F='GUARD(0.19685039370079DL)'/><Cell N='Height' V='0.1968503937007874' F='GUARD(0.19685039370079DL)'/><Cell N='LocPinX' V='0.09842519685039369' F='Inh'/><Cell N='LocPinY' V='0.09842519685039369' F='Inh'/><Cell N='BeginX' V='2.47324898760777' F='PAR(PNT(Sheet.182!Connections.X3,Sheet.182!Connections.Y3))'/><Cell N='BeginY' V='4.888779408991999' F='PAR(PNT(Sheet.182!Connections.X3,Sheet.182!Connections.Y3))'/><Cell N='EndX' V='2.473248987607777'/><Cell N='EndY' V='4.951771534976249'/><Cell N='LayerMember' V='0'/><Cell N='BegTrigger' V='2' F='_XFTRIGGER(Sheet.182!EventXFMod)'/><Cell N='EndTrigger' V='1' F='_XFTRIGGER(EventXFMod)'/><Cell N='TxtPinX' V='0.09842519462108611' F='Inh'/><Cell N='TxtPinY' V='0.09842519462108611' F='Inh'/><Cell N='EndArrow' V='0'/><Cell N='FillForegnd' V='#000000' F='Inh'/><Cell N='FillBkgnd' V='#ffffff' F='Inh'/><Cell N='ShdwForegnd' V='#000000' F='Inh'/><Cell N='ShapeShdwShow' V='2'/><Section N='Control'><Row N='TextPosition'><Cell N='X' V='0.09842519462108611'/><Cell N='Y' V='0.09842519462108611'/><Cell N='XDyn' V='0.09842519462108611' F='Inh'/><Cell N='YDyn' V='0.09842519462108611' F='Inh'/></Row></Section><Section N='Geometry' IX='0'><Row T='MoveTo' IX='1'><Cell N='X' V='0.09842519685038997'/><Cell N='Y' V='0.06692913385826849'/></Row><Row T='LineTo' IX='2'><Cell N='X' V='0.09842519685039708'/><Cell N='Y' V='0.1299212598425186'/></Row><Row T='LineTo' IX='3' Del='1'/></Section></Shape><Shape ID='191' NameU='Dynamic connector.70' Name='Dynamic connector.70' Type='Shape' Master='5'><Cell N='PinX' V='2.710233606722102' F='Inh'/><Cell N='PinY' V='4.45737231807533' F='Inh'/><Cell N='Width' V='0.1968503937007874' F='GUARD(0.19685039370079DL)'/><Cell N='Height' V='1.499390542576115' F='GUARD(EndY-BeginY)'/><Cell N='LocPinX' V='0.09842519685039369' F='Inh'/><Cell N='LocPinY' V='0.7496952712880576' F='Inh'/><Cell N='BeginX' V='2.709469598004504'/><Cell N='BeginY' V='3.707677046787273'/><Cell N='EndX' V='2.7109976154397' F='_WALKGLUE(EndTrigger,BegTrigger,WalkPreference)'/><Cell N='EndY' V='5.207067589363388' F='_WALKGLUE(EndTrigger,BegTrigger,WalkPreference)'/><Cell N='LayerMember' V='0'/><Cell N='BegTrigger' V='1' F='_XFTRIGGER(EventXFMod)'/><Cell N='EndTrigger' V='2' F='_XFTRIGGER(Sheet.200!EventXFMod)'/><Cell N='TxtPinX' V='0.09842519834637642' F='Inh'/><Cell N='TxtPinY' V='0.7496953010559082' F='Inh'/><Cell N='ConFixedCode' V='3'/><Cell N='FillForegnd' V='#000000' F='Inh'/><Cell N='FillBkgnd' V='#ffffff' F='Inh'/><Cell N='ShdwForegnd' V='#000000' F='Inh'/><Cell N='ShapeShdwShow' V='2'/><Section N='Control'><Row N='TextPosition'><Cell N='X' V='0.09842519834637642'/><Cell N='Y' V='0.7496953010559082'/><Cell N='XDyn' V='0.09842519834637642' F='Inh'/><Cell N='YDyn' V='0.7496953010559082' F='Inh'/></Row></Section><Section N='Geometry' IX='0'><Row T='MoveTo' IX='1'><Cell N='X' V='0.09766118813279601'/></Row><Row T='LineTo' IX='2'><Cell N='X' V='0.09918920556799149'/><Cell N='Y' V='1.499390542576115'/></Row><Row T='LineTo' IX='3' Del='1'/></Section></Shape><Shape ID='192' NameU='Circle.74' Name='Circle.74' Type='Shape' Master='9'><Cell N='PinX' V='0.8003487656600603'/><Cell N='PinY' V='3.479986804488786'/><Cell N='Width' V='0.2532807470641663'/><Cell N='Height' V='0.2532807470641663'/><Cell N='LocPinX' V='0.1266403735320831' F='Inh'/><Cell N='LocPinY' V='0.1266403735320831' F='Inh'/><Cell N='TxtPinX' V='0.1266403735320831' F='Inh'/><Cell N='TxtPinY' V='0.1266403735320831' F='Inh'/><Cell N='TxtWidth' V='0.2216206536811455' F='Inh'/><Cell N='TxtHeight' V='0.1899605602981247' F='Inh'/><Cell N='TxtLocPinX' V='0.1108103268405727' F='Inh'/><Cell N='TxtLocPinY' V='0.09498028014906235' F='Inh'/><Cell N='ObjType' V='1'/><Cell N='ShapeShdwShow' V='2'/><Section N='Connection'><Row T='Connection' IX='0'><Cell N='X' V='0.1266403735320831' F='Inh'/><Cell N='Y' V='0.2532807470641663' F='Inh'/></Row><Row T='Connection' IX='1'><Cell N='X' V='0.1266403735320831' F='Inh'/><Cell N='Y' V='0.1266403735320831' F='Inh'/></Row><Row T='Connection' IX='2'><Cell N='Y' V='0.1266403735320831' F='Inh'/></Row><Row T='Connection' IX='3'><Cell N='X' V='0.1266403735320831' F='Inh'/></Row><Row T='Connection' IX='4'><Cell N='X' V='0.2532807470641663' F='Inh'/><Cell N='Y' V='0.1266403735320831' F='Inh'/></Row><Row T='Connection' IX='5'><Cell N='X' V='0.03708030137019394' F='Inh'/><Cell N='Y' V='0.03708030137019394' F='Inh'/></Row><Row T='Connection' IX='6'><Cell N='X' V='0.2162004456939723' F='Inh'/><Cell N='Y' V='0.03708030137019394' F='Inh'/></Row><Row T='Connection' IX='7'><Cell N='X' V='0.2162004456939723' F='Inh'/><Cell N='Y' V='0.2162004456939723' F='Inh'/></Row><Row T='Connection' IX='8'><Cell N='X' V='0.03708030137019394' F='Inh'/><Cell N='Y' V='0.2162004456939723' F='Inh'/></Row></Section><Section N='Geometry' IX='0'><Row T='MoveTo' IX='1'><Cell N='Y' V='0.1266403735320831' F='Inh'/></Row><Row T='EllipticalArcTo' IX='2'><Cell N='X' V='0.2532807470641663' F='Inh'/><Cell N='Y' V='0.1266403735320831' F='Inh'/><Cell N='A' V='0.1266403735320831' U='DL' F='Inh'/><Cell N='B' V='0.2532807470641663' U='DL' F='Inh'/></Row><Row T='EllipticalArcTo' IX='3'><Cell N='Y' V='0.1266403735320831' F='Inh'/><Cell N='A' V='0.1266403735320831' U='DL' F='Inh'/></Row></Section></Shape><Shape ID='193' Type='Foreign' LineStyle='2' FillStyle='2' TextStyle='2'><Cell N='PinX' V='0.797430475821046'/><Cell N='PinY' V='3.983267518107532'/><Cell N='Width' V='0.1665354330708662'/><Cell N='Height' V='0.152755905511811'/><Cell N='LocPinX' V='0.08326771653543308' F='Width*0.5'/><Cell N='LocPinY' V='0.0763779527559055' F='Height*0.5'/><Cell N='Angle' V='0'/><Cell N='FlipX' V='0'/><Cell N='FlipY' V='0'/><Cell N='ResizeMode' V='0'/><Cell N='ImgOffsetX' V='0' F='ImgWidth*0'/><Cell N='ImgOffsetY' V='0' F='ImgHeight*0'/><Cell N='ImgWidth' V='0.1665354330708662' F='Width*1'/><Cell N='ImgHeight' V='0.152755905511811' F='Height*1'/><Cell N='ClippingPath' V='' F='No Formula' E='#N/A'/><Cell N='TxtPinX' V='0.08326771653543308' F='Width*0.5'/><Cell N='TxtPinY' V='0' F='Height*0'/><Cell N='TxtWidth' V='0.1665354330708662' F='Width*1'/><Cell N='TxtHeight' V='0' F='Height*0'/><Cell N='TxtLocPinX' V='0.08326771653543308' F='TxtWidth*0.5'/><Cell N='TxtLocPinY' V='0' F='TxtHeight*0.5'/><Cell N='TxtAngle' V='0'/><Cell N='VerticalAlign' V='0'/><Cell N='ShapeShdwShow' V='2'/><Section N='Geometry' IX='0'><Cell N='NoFill' V='0'/><Cell N='NoLine' V='0'/><Cell N='NoShow' V='0'/><Cell N='NoSnap' V='0'/><Cell N='NoQuickDrag' V='0'/><Row T='RelMoveTo' IX='1'><Cell N='X' V='0'/><Cell N='Y' V='0'/></Row><Row T='RelLineTo' IX='2'><Cell N='X' V='1'/><Cell N='Y' V='0'/></Row><Row T='RelLineTo' IX='3'><Cell N='X' V='1'/><Cell N='Y' V='1'/></Row><Row T='RelLineTo' IX='4'><Cell N='X' V='0'/><Cell N='Y' V='1'/></Row><Row T='RelLineTo' IX='5'><Cell N='X' V='0'/><Cell N='Y' V='0'/></Row></Section><ForeignData ForeignType='Object' ObjectType='33280' ShowAsIcon='0' ObjectWidth='0.16653543307087' ObjectHeight='0.15275590551181'><Rel r:id='rId5'/></ForeignData></Shape><Shape ID='194' Type='Foreign' LineStyle='2' FillStyle='2' TextStyle='2'><Cell N='PinX' V='1.190440607773515'/><Cell N='PinY' V='3.983267518107532'/><Cell N='Width' V='0.1665354330708662'/><Cell N='Height' V='0.152755905511811'/><Cell N='LocPinX' V='0.08326771653543308' F='Width*0.5'/><Cell N='LocPinY' V='0.0763779527559055' F='Height*0.5'/><Cell N='Angle' V='0'/><Cell N='FlipX' V='0'/><Cell N='FlipY' V='0'/><Cell N='ResizeMode' V='0'/><Cell N='ImgOffsetX' V='0' F='ImgWidth*0'/><Cell N='ImgOffsetY' V='0' F='ImgHeight*0'/><Cell N='ImgWidth' V='0.1665354330708662' F='Width*1'/><Cell N='ImgHeight' V='0.152755905511811' F='Height*1'/><Cell N='ClippingPath' V='' F='No Formula' E='#N/A'/><Cell N='TxtPinX' V='0.08326771653543308' F='Width*0.5'/><Cell N='TxtPinY' V='0' F='Height*0'/><Cell N='TxtWidth' V='0.1665354330708662' F='Width*1'/><Cell N='TxtHeight' V='0' F='Height*0'/><Cell N='TxtLocPinX' V='0.08326771653543308' F='TxtWidth*0.5'/><Cell N='TxtLocPinY' V='0' F='TxtHeight*0.5'/><Cell N='TxtAngle' V='0'/><Cell N='VerticalAlign' V='0'/><Cell N='ShapeShdwShow' V='2'/><Section N='Geometry' IX='0'><Cell N='NoFill' V='0'/><Cell N='NoLine' V='0'/><Cell N='NoShow' V='0'/><Cell N='NoSnap' V='0'/><Cell N='NoQuickDrag' V='0'/><Row T='RelMoveTo' IX='1'><Cell N='X' V='0'/><Cell N='Y' V='0'/></Row><Row T='RelLineTo' IX='2'><Cell N='X' V='1'/><Cell N='Y' V='0'/></Row><Row T='RelLineTo' IX='3'><Cell N='X' V='1'/><Cell N='Y' V='1'/></Row><Row T='RelLineTo' IX='4'><Cell N='X' V='0'/><Cell N='Y' V='1'/></Row><Row T='RelLineTo' IX='5'><Cell N='X' V='0'/><Cell N='Y' V='0'/></Row></Section><ForeignData ForeignType='Object' ObjectType='33280' ShowAsIcon='0' ObjectWidth='0.16653543307087' ObjectHeight='0.15275590551181'><Rel r:id='rId6'/></ForeignData></Shape><Shape ID='195' Type='Foreign' LineStyle='2' FillStyle='2' TextStyle='2'><Cell N='PinX' V='2.05002066439869'/><Cell N='PinY' V='3.983267518107532'/><Cell N='Width' V='0.1665354330708662'/><Cell N='Height' V='0.152755905511811'/><Cell N='LocPinX' V='0.08326771653543308' F='Width*0.5'/><Cell N='LocPinY' V='0.0763779527559055' F='Height*0.5'/><Cell N='Angle' V='0'/><Cell N='FlipX' V='0'/><Cell N='FlipY' V='0'/><Cell N='ResizeMode' V='0'/><Cell N='ImgOffsetX' V='0' F='ImgWidth*0'/><Cell N='ImgOffsetY' V='0' F='ImgHeight*0'/><Cell N='ImgWidth' V='0.1665354330708662' F='Width*1'/><Cell N='ImgHeight' V='0.152755905511811' F='Height*1'/><Cell N='ClippingPath' V='' F='No Formula' E='#N/A'/><Cell N='TxtPinX' V='0.08326771653543308' F='Width*0.5'/><Cell N='TxtPinY' V='0' F='Height*0'/><Cell N='TxtWidth' V='0.1665354330708662' F='Width*1'/><Cell N='TxtHeight' V='0' F='Height*0'/><Cell N='TxtLocPinX' V='0.08326771653543308' F='TxtWidth*0.5'/><Cell N='TxtLocPinY' V='0' F='TxtHeight*0.5'/><Cell N='TxtAngle' V='0'/><Cell N='VerticalAlign' V='0'/><Cell N='ShapeShdwShow' V='2'/><Section N='Geometry' IX='0'><Cell N='NoFill' V='0'/><Cell N='NoLine' V='0'/><Cell N='NoShow' V='0'/><Cell N='NoSnap' V='0'/><Cell N='NoQuickDrag' V='0'/><Row T='RelMoveTo' IX='1'><Cell N='X' V='0'/><Cell N='Y' V='0'/></Row><Row T='RelLineTo' IX='2'><Cell N='X' V='1'/><Cell N='Y' V='0'/></Row><Row T='RelLineTo' IX='3'><Cell N='X' V='1'/><Cell N='Y' V='1'/></Row><Row T='RelLineTo' IX='4'><Cell N='X' V='0'/><Cell N='Y' V='1'/></Row><Row T='RelLineTo' IX='5'><Cell N='X' V='0'/><Cell N='Y' V='0'/></Row></Section><ForeignData ForeignType='Object' ObjectType='33280' ShowAsIcon='0' ObjectWidth='0.16653543307087' ObjectHeight='0.15275590551181'><Rel r:id='rId7'/></ForeignData></Shape><Shape ID='196' Type='Foreign' LineStyle='2' FillStyle='2' TextStyle='2'><Cell N='PinX' V='1.5493645149973'/><Cell N='PinY' V='3.983267518107533'/><Cell N='Width' V='0.3468503937007874'/><Cell N='Height' V='0.1940944881889764'/><Cell N='LocPinX' V='0.1734251968503937' F='Width*0.5'/><Cell N='LocPinY' V='0.09704724409448819' F='Height*0.5'/><Cell N='Angle' V='0'/><Cell N='FlipX' V='0'/><Cell N='FlipY' V='0'/><Cell N='ResizeMode' V='0'/><Cell N='ImgOffsetX' V='0' F='ImgWidth*0'/><Cell N='ImgOffsetY' V='0' F='ImgHeight*0'/><Cell N='ImgWidth' V='0.3468503937007874' F='Width*1'/><Cell N='ImgHeight' V='0.1940944881889764' F='Height*1'/><Cell N='ClippingPath' V='' F='No Formula' E='#N/A'/><Cell N='TxtPinX' V='0.1734251968503937' F='Width*0.5'/><Cell N='TxtPinY' V='0' F='Height*0'/><Cell N='TxtWidth' V='0.3468503937007874' F='Width*1'/><Cell N='TxtHeight' V='0' F='Height*0'/><Cell N='TxtLocPinX' V='0.1734251968503937' F='TxtWidth*0.5'/><Cell N='TxtLocPinY' V='0' F='TxtHeight*0.5'/><Cell N='TxtAngle' V='0'/><Cell N='VerticalAlign' V='0'/><Cell N='ShapeShdwShow' V='2'/><Section N='Geometry' IX='0'><Cell N='NoFill' V='0'/><Cell N='NoLine' V='0'/><Cell N='NoShow' V='0'/><Cell N='NoSnap' V='0'/><Cell N='NoQuickDrag' V='0'/><Row T='RelMoveTo' IX='1'><Cell N='X' V='0'/><Cell N='Y' V='0'/></Row><Row T='RelLineTo' IX='2'><Cell N='X' V='1'/><Cell N='Y' V='0'/></Row><Row T='RelLineTo' IX='3'><Cell N='X' V='1'/><Cell N='Y' V='1'/></Row><Row T='RelLineTo' IX='4'><Cell N='X' V='0'/><Cell N='Y' V='1'/></Row><Row T='RelLineTo' IX='5'><Cell N='X' V='0'/><Cell N='Y' V='0'/></Row></Section><ForeignData ForeignType='Object' ObjectType='33280' ShowAsIcon='0' ObjectWidth='0.34685039370079' ObjectHeight='0.19409448818898'><Rel r:id='rId9'/></ForeignData></Shape><Shape ID='197' Type='Foreign' LineStyle='2' FillStyle='2' TextStyle='2'><Cell N='PinX' V='2.47324898760777'/><Cell N='PinY' V='4.77066917385872'/><Cell N='Width' V='0.3468503937007874'/><Cell N='Height' V='0.1940944881889764'/><Cell N='LocPinX' V='0.1734251968503937' F='Width*0.5'/><Cell N='LocPinY' V='0.09704724409448819' F='Height*0.5'/><Cell N='Angle' V='0'/><Cell N='FlipX' V='0'/><Cell N='FlipY' V='0'/><Cell N='ResizeMode' V='0'/><Cell N='ImgOffsetX' V='0' F='ImgWidth*0'/><Cell N='ImgOffsetY' V='0' F='ImgHeight*0'/><Cell N='ImgWidth' V='0.3468503937007874' F='Width*1'/><Cell N='ImgHeight' V='0.1940944881889764' F='Height*1'/><Cell N='ClippingPath' V='' F='No Formula' E='#N/A'/><Cell N='TxtPinX' V='0.1734251968503937' F='Width*0.5'/><Cell N='TxtPinY' V='0' F='Height*0'/><Cell N='TxtWidth' V='0.3468503937007874' F='Width*1'/><Cell N='TxtHeight' V='0' F='Height*0'/><Cell N='TxtLocPinX' V='0.1734251968503937' F='TxtWidth*0.5'/><Cell N='TxtLocPinY' V='0' F='TxtHeight*0.5'/><Cell N='TxtAngle' V='0'/><Cell N='VerticalAlign' V='0'/><Cell N='ShapeShdwShow' V='2'/><Section N='Character'><Row IX='0'><Cell N='Font' V='Times New Roman'/><Cell N='ComplexScriptFont' V='Times New Roman'/></Row></Section><Section N='Geometry' IX='0'><Cell N='NoFill' V='0'/><Cell N='NoLine' V='0'/><Cell N='NoShow' V='0'/><Cell N='NoSnap' V='0'/><Cell N='NoQuickDrag' V='0'/><Row T='RelMoveTo' IX='1'><Cell N='X' V='0'/><Cell N='Y' V='0'/></Row><Row T='RelLineTo' IX='2'><Cell N='X' V='1'/><Cell N='Y' V='0'/></Row><Row T='RelLineTo' IX='3'><Cell N='X' V='1'/><Cell N='Y' V='1'/></Row><Row T='RelLineTo' IX='4'><Cell N='X' V='0'/><Cell N='Y' V='1'/></Row><Row T='RelLineTo' IX='5'><Cell N='X' V='0'/><Cell N='Y' V='0'/></Row></Section><ForeignData ForeignType='Object' ObjectType='33280' ShowAsIcon='0' ObjectWidth='0.34685039370079' ObjectHeight='0.19409448818898'><Rel r:id='rId11'/></ForeignData></Shape><Shape ID='198' Type='Foreign' LineStyle='2' FillStyle='2' TextStyle='2'><Cell N='PinX' V='0.8059262564048515'/><Cell N='PinY' V='3.508392140554493'/><Cell N='Width' V='0.2637795275590552'/><Cell N='Height' V='0.25'/><Cell N='LocPinX' V='0.1318897637795276' F='Width*0.5'/><Cell N='LocPinY' V='0.125' F='Height*0.5'/><Cell N='Angle' V='0'/><Cell N='FlipX' V='0'/><Cell N='FlipY' V='0'/><Cell N='ResizeMode' V='0'/><Cell N='ImgOffsetX' V='0' F='ImgWidth*0'/><Cell N='ImgOffsetY' V='0' F='ImgHeight*0'/><Cell N='ImgWidth' V='0.2637795275590552' F='Width*1'/><Cell N='ImgHeight' V='0.25' F='Height*1'/><Cell N='ClippingPath' V='' F='No Formula' E='#N/A'/><Cell N='TxtPinX' V='0.1318897637795276' F='Width*0.5'/><Cell N='TxtPinY' V='0' F='Height*0'/><Cell N='TxtWidth' V='0.2637795275590552' F='Width*1'/><Cell N='TxtHeight' V='0' F='Height*0'/><Cell N='TxtLocPinX' V='0.1318897637795276' F='TxtWidth*0.5'/><Cell N='TxtLocPinY' V='0' F='TxtHeight*0.5'/><Cell N='TxtAngle' V='0'/><Cell N='VerticalAlign' V='0'/><Cell N='ShapeShdwShow' V='2'/><Section N='Geometry' IX='0'><Cell N='NoFill' V='0'/><Cell N='NoLine' V='0'/><Cell N='NoShow' V='0'/><Cell N='NoSnap' V='0'/><Cell N='NoQuickDrag' V='0'/><Row T='RelMoveTo' IX='1'><Cell N='X' V='0'/><Cell N='Y' V='0'/></Row><Row T='RelLineTo' IX='2'><Cell N='X' V='1'/><Cell N='Y' V='0'/></Row><Row T='RelLineTo' IX='3'><Cell N='X' V='1'/><Cell N='Y' V='1'/></Row><Row T='RelLineTo' IX='4'><Cell N='X' V='0'/><Cell N='Y' V='1'/></Row><Row T='RelLineTo' IX='5'><Cell N='X' V='0'/><Cell N='Y' V='0'/></Row></Section><ForeignData ForeignType='Object' ObjectType='33280' ShowAsIcon='0' ObjectWidth='0.26377952755906' ObjectHeight='0.25'><Rel r:id='rId13'/></ForeignData></Shape><Shape ID='199' NameU='Circle.44' Name='圆形.44' Type='Shape' Master='9'><Cell N='PinX' V='2.709469598004507'/><Cell N='PinY' V='5.313326940634936'/><Cell N='Width' V='0.2532677165354331'/><Cell N='Height' V='0.2532677165354331'/><Cell N='LocPinX' V='0.1266338582677165' F='Inh'/><Cell N='LocPinY' V='0.1266338582677165' F='Inh'/><Cell N='TxtPinX' V='0.1266338582677165' F='Inh'/><Cell N='TxtPinY' V='0.1266338582677165' F='Inh'/><Cell N='TxtWidth' V='0.2216092519685039' F='Inh'/><Cell N='TxtHeight' V='0.1899507874015748' F='Inh'/><Cell N='TxtLocPinX' V='0.110804625984252' F='Inh'/><Cell N='TxtLocPinY' V='0.09497539370078739' F='Inh'/><Cell N='ObjType' V='1'/><Cell N='ShapeShdwShow' V='2'/><Section N='Connection'><Row T='Connection' IX='0'><Cell N='X' V='0.1266338582677165' F='Inh'/><Cell N='Y' V='0.2532677165354331' F='Inh'/></Row><Row T='Connection' IX='1'><Cell N='X' V='0.1266338582677165' F='Inh'/><Cell N='Y' V='0.1266338582677165' F='Inh'/></Row><Row T='Connection' IX='2'><Cell N='Y' V='0.1266338582677165' F='Inh'/></Row><Row T='Connection' IX='3'><Cell N='X' V='0.1266338582677165' F='Inh'/></Row><Row T='Connection' IX='4'><Cell N='X' V='0.2532677165354331' F='Inh'/><Cell N='Y' V='0.1266338582677165' F='Inh'/></Row><Row T='Connection' IX='5'><Cell N='X' V='0.0370783937007874' F='Inh'/><Cell N='Y' V='0.0370783937007874' F='Inh'/></Row><Row T='Connection' IX='6'><Cell N='X' V='0.2161893228346457' F='Inh'/><Cell N='Y' V='0.0370783937007874' F='Inh'/></Row><Row T='Connection' IX='7'><Cell N='X' V='0.2161893228346457' F='Inh'/><Cell N='Y' V='0.2161893228346457' F='Inh'/></Row><Row T='Connection' IX='8'><Cell N='X' V='0.0370783937007874' F='Inh'/><Cell N='Y' V='0.2161893228346457' F='Inh'/></Row></Section><Section N='Geometry' IX='0'><Row T='MoveTo' IX='1'><Cell N='Y' V='0.1266338582677165' F='Inh'/></Row><Row T='EllipticalArcTo' IX='2'><Cell N='X' V='0.2532677165354331' F='Inh'/><Cell N='Y' V='0.1266338582677165' F='Inh'/><Cell N='A' V='0.1266338582677165' U='DL' F='Inh'/><Cell N='B' V='0.2532677165354331' U='DL' F='Inh'/></Row><Row T='EllipticalArcTo' IX='3'><Cell N='Y' V='0.1266338582677165' F='Inh'/><Cell N='A' V='0.1266338582677165' U='DL' F='Inh'/></Row></Section></Shape><Shape ID='200' Type='Foreign' LineStyle='2' FillStyle='2' TextStyle='2'><Cell N='PinX' V='2.711103456272223'/><Cell N='PinY' V='5.306250352286452'/><Cell N='Width' V='0.25'/><Cell N='Height' V='0.25'/><Cell N='LocPinX' V='0.125' F='Width*0.5'/><Cell N='LocPinY' V='0.125' F='Height*0.5'/><Cell N='Angle' V='0'/><Cell N='FlipX' V='0'/><Cell N='FlipY' V='0'/><Cell N='ResizeMode' V='0'/><Cell N='ImgOffsetX' V='0' F='ImgWidth*0'/><Cell N='ImgOffsetY' V='0' F='ImgHeight*0'/><Cell N='ImgWidth' V='0.25' F='Width*1'/><Cell N='ImgHeight' V='0.25' F='Height*1'/><Cell N='ClippingPath' V='' F='No Formula' E='#N/A'/><Cell N='TxtPinX' V='0.125' F='Width*0.5'/><Cell N='TxtPinY' V='0' F='Height*0'/><Cell N='TxtWidth' V='0.25' F='Width*1'/><Cell N='TxtHeight' V='0' F='Height*0'/><Cell N='TxtLocPinX' V='0.125' F='TxtWidth*0.5'/><Cell N='TxtLocPinY' V='0' F='TxtHeight*0.5'/><Cell N='TxtAngle' V='0'/><Cell N='VerticalAlign' V='0'/><Cell N='ObjType' V='1'/><Cell N='ShapeShdwShow' V='2'/><Section N='Character'><Row IX='0'><Cell N='Font' V='Times New Roman'/><Cell N='ComplexScriptFont' V='Times New Roman'/></Row></Section><Section N='Geometry' IX='0'><Cell N='NoFill' V='0'/><Cell N='NoLine' V='0'/><Cell N='NoShow' V='0'/><Cell N='NoSnap' V='0'/><Cell N='NoQuickDrag' V='0'/><Row T='RelMoveTo' IX='1'><Cell N='X' V='0'/><Cell N='Y' V='0'/></Row><Row T='RelLineTo' IX='2'><Cell N='X' V='1'/><Cell N='Y' V='0'/></Row><Row T='RelLineTo' IX='3'><Cell N='X' V='1'/><Cell N='Y' V='1'/></Row><Row T='RelLineTo' IX='4'><Cell N='X' V='0'/><Cell N='Y' V='1'/></Row><Row T='RelLineTo' IX='5'><Cell N='X' V='0'/><Cell N='Y' V='0'/></Row></Section><ForeignData ForeignType='Object' ObjectType='33280' ShowAsIcon='0' ObjectWidth='0.25' ObjectHeight='0.25'><Rel r:id='rId16'/></ForeignData></Shape><Shape ID='201' Type='Foreign' LineStyle='2' FillStyle='2' TextStyle='2'><Cell N='PinX' V='2.834469625108991'/><Cell N='PinY' V='3.543307193978042'/><Cell N='Width' V='0.25'/><Cell N='Height' V='0.25'/><Cell N='LocPinX' V='0.125' F='Width*0.5'/><Cell N='LocPinY' V='0.125' F='Height*0.5'/><Cell N='Angle' V='0'/><Cell N='FlipX' V='0'/><Cell N='FlipY' V='0'/><Cell N='ResizeMode' V='0'/><Cell N='ImgOffsetX' V='0' F='ImgWidth*0'/><Cell N='ImgOffsetY' V='0' F='ImgHeight*0'/><Cell N='ImgWidth' V='0.25' F='Width*1'/><Cell N='ImgHeight' V='0.25' F='Height*1'/><Cell N='ClippingPath' V='' F='No Formula' E='#N/A'/><Cell N='TxtPinX' V='0.125' F='Width*0.5'/><Cell N='TxtPinY' V='0' F='Height*0'/><Cell N='TxtWidth' V='0.25' F='Width*1'/><Cell N='TxtHeight' V='0' F='Height*0'/><Cell N='TxtLocPinX' V='0.125' F='TxtWidth*0.5'/><Cell N='TxtLocPinY' V='0' F='TxtHeight*0.5'/><Cell N='TxtAngle' V='0'/><Cell N='VerticalAlign' V='0'/><Cell N='ObjType' V='1'/><Section N='Geometry' IX='0'><Cell N='NoFill' V='0'/><Cell N='NoLine' V='0'/><Cell N='NoShow' V='0'/><Cell N='NoSnap' V='0'/><Cell N='NoQuickDrag' V='0'/><Row T='RelMoveTo' IX='1'><Cell N='X' V='0'/><Cell N='Y' V='0'/></Row><Row T='RelLineTo' IX='2'><Cell N='X' V='1'/><Cell N='Y' V='0'/></Row><Row T='RelLineTo' IX='3'><Cell N='X' V='1'/><Cell N='Y' V='1'/></Row><Row T='RelLineTo' IX='4'><Cell N='X' V='0'/><Cell N='Y' V='1'/></Row><Row T='RelLineTo' IX='5'><Cell N='X' V='0'/><Cell N='Y' V='0'/></Row></Section><ForeignData ForeignType='Object' ObjectType='33280' ShowAsIcon='0' ObjectWidth='0.25' ObjectHeight='0.25'><Rel r:id='rId4'/></ForeignData></Shape><Shape ID='202' NameU='Rectangle.101' Name='矩形.101' Type='Shape' Master='4'><Cell N='PinX' V='4.100373135289964'/><Cell N='PinY' V='4.376716205064689'/><Cell N='Width' V='2.165354389455119'/><Cell N='Height' V='1.416818022173294'/><Cell N='LocPinX' V='1.082677194727559' F='Inh'/><Cell N='LocPinY' V='0.7084090110866472' F='Inh'/><Cell N='FillPattern' V='0'/><Cell N='ShapeShdwShow' V='2'/><Cell N='FillGradientEnabled' V='0'/><Cell N='RotateGradientWithShape' V='0'/><Cell N='UseGroupGradient' V='0'/><Cell N='Rounding' V='0.1574803149606299'/><Section N='Connection'><Row T='Connection' IX='0'><Cell N='X' V='1.082677194727559' F='Inh'/></Row><Row T='Connection' IX='1'><Cell N='X' V='2.165354389455119' F='Inh'/><Cell N='Y' V='0.7084090110866472' F='Inh'/></Row><Row T='Connection' IX='2'><Cell N='X' V='1.082677194727559' F='Inh'/><Cell N='Y' V='1.416818022173294' F='Inh'/></Row><Row T='Connection' IX='3'><Cell N='Y' V='0.7084090110866472' F='Inh'/></Row><Row T='Connection' IX='4'><Cell N='X' V='1.082677194727559' F='Inh'/><Cell N='Y' V='0.7084090110866472' F='Inh'/></Row></Section><Section N='Geometry' IX='0'><Row T='LineTo' IX='2'><Cell N='X' V='2.165354389455119' F='Inh'/></Row><Row T='LineTo' IX='3'><Cell N='X' V='2.165354389455119' F='Inh'/><Cell N='Y' V='1.416818022173294' F='Inh'/></Row><Row T='LineTo' IX='4'><Cell N='Y' V='1.416818022173294' F='Inh'/></Row></Section></Shape><Shape ID='203' NameU='Dynamic connector' Name='动态连接线' Type='Shape' Master='5'><Cell N='PinX' V='3.004745222506565' U='MM' F='Inh'/><Cell N='PinY' V='4.950165898365486' F='Inh'/><Cell N='Width' V='0.1968503937007874' F='GUARD(0.19685039370079DL)'/><Cell N='Height' V='0.1968503937007874' F='GUARD(0.19685039370079DL)'/><Cell N='LocPinX' V='0.09842519685039369' F='Inh'/><Cell N='LocPinY' V='0.09842519685039369' F='Inh'/><Cell N='BeginX' V='2.932221456427257'/><Cell N='BeginY' V='4.947834738055422'/><Cell N='EndX' V='3.077268988585872' U='MM' F='PAR(PNT(Sheet.206!Connections.X3,Sheet.206!Connections.Y3))'/><Cell N='EndY' V='4.952497058675551' F='PAR(PNT(Sheet.206!Connections.X3,Sheet.206!Connections.Y3))'/><Cell N='LayerMember' V='0'/><Cell N='BegTrigger' V='1' F='_XFTRIGGER(EventXFMod)'/><Cell N='EndTrigger' V='2' F='_XFTRIGGER(Sheet.206!EventXFMod)'/><Cell N='ConFixedCode' V='3'/><Cell N='TxtPinX' V='0.09842519927769901' F='Inh'/><Cell N='TxtPinY' V='0.0984251946210859' F='Inh'/><Cell N='EndArrow' V='0'/><Cell N='FillForegnd' V='#000000' F='Inh'/><Cell N='FillBkgnd' V='#ffffff' F='Inh'/><Cell N='ShdwForegnd' V='#000000' F='Inh'/><Cell N='ShapeShdwShow' V='2'/><Section N='Control'><Row N='TextPosition'><Cell N='X' V='0.09842519927769901'/><Cell N='Y' V='0.0984251946210859'/><Cell N='XDyn' V='0.09842519927769901' F='Inh'/><Cell N='YDyn' V='0.0984251946210859' F='Inh'/></Row></Section><Section N='Geometry' IX='0'><Row T='MoveTo' IX='1'><Cell N='X' V='0.02590143077108653'/><Cell N='Y' V='0.09609403654032889'/></Row><Row T='LineTo' IX='2'><Cell N='X' V='0.1709489629297005'/><Cell N='Y' V='0.1007563571604591'/></Row><Row T='LineTo' IX='3' Del='1'/></Section></Shape><Shape ID='204' NameU='Dynamic connector.104' Name='动态连接线.2' IsCustomName='1' Type='Shape' Master='5'><Cell N='PinX' V='5.078149744428435' F='Inh'/><Cell N='PinY' V='4.026574880955935' U='MM' F='Inh'/><Cell N='Width' V='0.4325530009906284' F='GUARD(EndX-BeginX)'/><Cell N='Height' V='-0.622047281799031' U='MM' F='GUARD(EndY-BeginY)'/><Cell N='LocPinX' V='0.2162765004953142' F='Inh'/><Cell N='LocPinY' V='-0.3110236408995155' U='MM' F='Inh'/><Cell N='BeginX' V='4.861873243933121' F='PAR(PNT(Sheet.216!Connections.X4,Sheet.216!Connections.Y4))'/><Cell N='BeginY' V='4.33759852185545' U='MM' F='PAR(PNT(Sheet.216!Connections.X4,Sheet.216!Connections.Y4))'/><Cell N='EndX' V='5.294426244923749'/><Cell N='EndY' V='3.715551240056419'/><Cell N='LayerMember' V='0'/><Cell N='BegTrigger' V='2' F='_XFTRIGGER(Sheet.216!EventXFMod)'/><Cell N='EndTrigger' V='1' F='_XFTRIGGER(EventXFMod)'/><Cell N='TxtPinY' V='-0.5273001413948307' F='Inh'/><Cell N='ConFixedCode' V='3'/><Cell N='FillForegnd' V='#000000' F='Inh'/><Cell N='FillBkgnd' V='#ffffff' F='Inh'/><Cell N='ShdwForegnd' V='#000000' F='Inh'/><Cell N='ShapeShdwShow' V='2'/><Section N='Control'><Row N='TextPosition'><Cell N='Y' V='-0.5273001413948307'/><Cell N='YDyn' V='-0.5273001413948307' F='Inh'/></Row></Section><Section N='Geometry' IX='0'><Row T='LineTo' IX='2'><Cell N='Y' V='-0.6220472817990306'/></Row><Row T='LineTo' IX='3'><Cell N='X' V='0.4325530009906302'/><Cell N='Y' V='-0.6220472817990306'/></Row></Section></Shape><Shape ID='205' Type='Group' LineStyle='8' FillStyle='8' TextStyle='8'><Cell N='PinX' V='3.185536723698917'/><Cell N='PinY' V='4.952497058675551'/><Cell N='Width' V='0.2165354702260895'/><Cell N='Height' V='0.2165354702260895'/><Cell N='LocPinX' V='0.1082677351130448' F='Width*0.5'/><Cell N='LocPinY' V='0.1082677351130448' F='Height*0.5'/><Cell N='Angle' V='0'/><Cell N='FlipX' V='0'/><Cell N='FlipY' V='0'/><Cell N='ResizeMode' V='0'/><Cell N='QuickStyleVariation' V='2'/><Cell N='ObjType' V='8'/><Cell N='ShapeShdwShow' V='2'/><Shapes><Shape ID='206' NameU='Circle' Name='圆形' Type='Shape' Master='9'><Cell N='PinX' V='0.1082677351130448' F='Sheet.205!Width*0.5'/><Cell N='PinY' V='0.1082677351130448' F='Sheet.205!Height*0.5'/><Cell N='Width' V='0.2165354702260895' F='Sheet.205!Width*1'/><Cell N='Height' V='0.2165354702260895' F='Sheet.205!Height*1'/><Cell N='LocPinX' V='0.1082677351130448' F='Inh'/><Cell N='LocPinY' V='0.1082677351130448' F='Inh'/><Cell N='TxtPinX' V='0.1082677351130448' F='Inh'/><Cell N='TxtPinY' V='0.1082677351130448' F='Inh'/><Cell N='TxtWidth' V='0.1894685364478283' F='Inh'/><Cell N='TxtHeight' V='0.1624016026695672' F='Inh'/><Cell N='TxtLocPinX' V='0.09473426822391416' F='Inh'/><Cell N='TxtLocPinY' V='0.08120080133478358' F='Inh'/><Cell N='ObjType' V='1'/><Section N='Connection'><Row T='Connection' IX='0'><Cell N='X' V='0.1082677351130448' F='Inh'/><Cell N='Y' V='0.2165354702260895' F='Inh'/></Row><Row T='Connection' IX='1'><Cell N='X' V='0.1082677351130448' F='Inh'/><Cell N='Y' V='0.1082677351130448' F='Inh'/></Row><Row T='Connection' IX='2'><Cell N='Y' V='0.1082677351130448' F='Inh'/></Row><Row T='Connection' IX='3'><Cell N='X' V='0.1082677351130448' F='Inh'/></Row><Row T='Connection' IX='4'><Cell N='X' V='0.2165354702260895' F='Inh'/><Cell N='Y' V='0.1082677351130448' F='Inh'/></Row><Row T='Connection' IX='5'><Cell N='X' V='0.03170079284109951' F='Inh'/><Cell N='Y' V='0.03170079284109951' F='Inh'/></Row><Row T='Connection' IX='6'><Cell N='X' V='0.18483467738499' F='Inh'/><Cell N='Y' V='0.03170079284109951' F='Inh'/></Row><Row T='Connection' IX='7'><Cell N='X' V='0.18483467738499' F='Inh'/><Cell N='Y' V='0.18483467738499' F='Inh'/></Row><Row T='Connection' IX='8'><Cell N='X' V='0.03170079284109951' F='Inh'/><Cell N='Y' V='0.18483467738499' F='Inh'/></Row></Section><Section N='Geometry' IX='0'><Row T='MoveTo' IX='1'><Cell N='Y' V='0.1082677351130448' F='Inh'/></Row><Row T='EllipticalArcTo' IX='2'><Cell N='X' V='0.2165354702260895' F='Inh'/><Cell N='Y' V='0.1082677351130448' F='Inh'/><Cell N='A' V='0.1082677351130448' U='DL' F='Inh'/><Cell N='B' V='0.2165354702260895' U='DL' F='Inh'/></Row><Row T='EllipticalArcTo' IX='3'><Cell N='Y' V='0.1082677351130448' F='Inh'/><Cell N='A' V='0.1082677351130448' U='DL' F='Inh'/></Row></Section></Shape><Shape ID='207' NameU='Dynamic connector.11' IsCustomNameU='1' Name='动态连接线.11' IsCustomName='1' Type='Shape' Master='5'><Cell N='PinX' V='0.1082677351130448' F='Inh'/><Cell N='PinY' V='0.1082677351130448' F='Inh'/><Cell N='Width' V='0.1968503937007874' F='GUARD(0.19685039370079DL)'/><Cell N='Height' V='0.1968503937007874' F='GUARD(0.19685039370079DL)'/><Cell N='LocPinX' V='0.09842519685039369' F='Inh'/><Cell N='LocPinY' V='0.09842519685039369' F='Inh'/><Cell N='BeginX' V='0.03170079284109972' F='PAR(PNT(Sheet.206!Connections.X6,Sheet.206!Connections.Y6))'/><Cell N='BeginY' V='0.03170079284109928' F='PAR(PNT(Sheet.206!Connections.X6,Sheet.206!Connections.Y6))'/><Cell N='EndX' V='0.1848346773849898' F='PAR(PNT(Sheet.206!Connections.X8,Sheet.206!Connections.Y8))'/><Cell N='EndY' V='0.1848346773849903' F='PAR(PNT(Sheet.206!Connections.X8,Sheet.206!Connections.Y8))'/><Cell N='LayerMember' V='0'/><Cell N='BegTrigger' V='2' F='_XFTRIGGER(Sheet.206!EventXFMod)'/><Cell N='EndTrigger' V='2' F='_XFTRIGGER(Sheet.206!EventXFMod)'/><Cell N='ShapeRouteStyle' V='16'/><Cell N='ConLineRouteExt' V='1'/><Cell N='TxtPinX' V='0.09842519927769902' F='Inh'/><Cell N='TxtPinY' V='0.09842519927769902' F='Inh'/><Cell N='EndArrow' V='0'/><Section N='Control'><Row N='TextPosition'><Cell N='X' V='0.09842519927769902'/><Cell N='Y' V='0.09842519927769902'/><Cell N='XDyn' V='0.09842519927769902' F='Inh'/><Cell N='YDyn' V='0.09842519927769902' F='Inh'/></Row></Section><Section N='Geometry' IX='0'><Row T='MoveTo' IX='1'><Cell N='X' V='0.0218582545784482'/><Cell N='Y' V='0.0218582545784482'/></Row><Row T='LineTo' IX='2'><Cell N='X' V='0.1749921391223392'/><Cell N='Y' V='0.1749921391223392'/></Row><Row T='LineTo' IX='3' Del='1'/></Section></Shape><Shape ID='208' NameU='Dynamic connector.12' IsCustomNameU='1' Name='动态连接线.12' IsCustomName='1' Type='Shape' Master='5'><Cell N='PinX' V='0.1082677351130448' F='Inh'/><Cell N='PinY' V='0.1082677351130448' F='Inh'/><Cell N='Width' V='0.1968503937007874' F='GUARD(0.19685039370079DL)'/><Cell N='Height' V='-0.1968503937007874' F='GUARD(-0.19685039370079DL)'/><Cell N='LocPinX' V='0.09842519685039369' F='Inh'/><Cell N='LocPinY' V='-0.09842519685039369' F='Inh'/><Cell N='BeginX' V='0.03170079284109972' F='PAR(PNT(Sheet.206!Connections.X9,Sheet.206!Connections.Y9))'/><Cell N='BeginY' V='0.1848346773849903' F='PAR(PNT(Sheet.206!Connections.X9,Sheet.206!Connections.Y9))'/><Cell N='EndX' V='0.1848346773849898' F='PAR(PNT(Sheet.206!Connections.X7,Sheet.206!Connections.Y7))'/><Cell N='EndY' V='0.03170079284109928' F='PAR(PNT(Sheet.206!Connections.X7,Sheet.206!Connections.Y7))'/><Cell N='LayerMember' V='0'/><Cell N='BegTrigger' V='2' F='_XFTRIGGER(Sheet.206!EventXFMod)'/><Cell N='EndTrigger' V='2' F='_XFTRIGGER(Sheet.206!EventXFMod)'/><Cell N='ShapeRouteStyle' V='16'/><Cell N='ConLineRouteExt' V='1'/><Cell N='TxtPinX' V='0.09842519927769902' F='Inh'/><Cell N='TxtPinY' V='-0.09842519927769902' F='Inh'/><Cell N='EndArrow' V='0'/><Section N='Control'><Row N='TextPosition'><Cell N='X' V='0.09842519927769902'/><Cell N='Y' V='-0.09842519927769902'/><Cell N='XDyn' V='0.09842519927769902' F='Inh'/><Cell N='YDyn' V='-0.09842519927769902' F='Inh'/></Row></Section><Section N='Geometry' IX='0'><Row T='MoveTo' IX='1'><Cell N='X' V='0.0218582545784482'/><Cell N='Y' V='-0.0218582545784482'/></Row><Row T='LineTo' IX='2'><Cell N='X' V='0.1749921391223392'/><Cell N='Y' V='-0.1749921391223392'/></Row><Row T='LineTo' IX='3' Del='1'/></Section></Shape></Shapes></Shape><Shape ID='209' NameU='Dynamic connector.109' Name='动态连接线.14' IsCustomName='1' Type='Shape' Master='5'><Cell N='PinX' V='3.561365644098572' U='MM' F='Inh'/><Cell N='PinY' V='4.952519581747628' F='Inh'/><Cell N='Width' V='0.5351223705732209' U='MM' F='GUARD(EndX-BeginX)'/><Cell N='Height' V='0.1968503937007874' F='GUARD(0.19685039370079DL)'/><Cell N='LocPinX' V='0.2675611852866107' U='MM' F='Inh'/><Cell N='LocPinY' V='0.09842519685039369' F='Inh'/><Cell N='BeginX' V='3.293804458811962' F='PAR(PNT(Sheet.206!Connections.X5,Sheet.206!Connections.Y5))'/><Cell N='BeginY' V='4.952497058675551' F='PAR(PNT(Sheet.206!Connections.X5,Sheet.206!Connections.Y5))'/><Cell N='EndX' V='3.828926829385182' U='MM' F='PAR(PNT(Sheet.211!Connections.X3,Sheet.211!Connections.Y3))'/><Cell N='EndY' V='4.952542104819705' F='PAR(PNT(Sheet.211!Connections.X3,Sheet.211!Connections.Y3))'/><Cell N='LayerMember' V='0'/><Cell N='BegTrigger' V='2' F='_XFTRIGGER(Sheet.206!EventXFMod)'/><Cell N='EndTrigger' V='2' F='_XFTRIGGER(Sheet.211!EventXFMod)'/><Cell N='ConFixedCode' V='3'/><Cell N='TxtPinX' V='0.2675611972808838' F='Inh'/><Cell N='TxtPinY' V='0.09842519462108612' F='Inh'/><Cell N='EndArrow' V='0'/><Cell N='FillForegnd' V='#000000' F='Inh'/><Cell N='FillBkgnd' V='#ffffff' F='Inh'/><Cell N='ShdwForegnd' V='#000000' F='Inh'/><Cell N='ShapeShdwShow' V='2'/><Section N='Control'><Row N='TextPosition'><Cell N='X' V='0.2675611972808838'/><Cell N='Y' V='0.09842519462108612'/><Cell N='XDyn' V='0.2675611972808838' F='Inh'/><Cell N='YDyn' V='0.09842519462108612' F='Inh'/></Row></Section><Section N='Geometry' IX='0'><Row T='MoveTo' IX='1'><Cell N='Y' V='0.0984026737783168'/></Row><Row T='LineTo' IX='2'><Cell N='X' V='0.5351223705732204'/><Cell N='Y' V='0.09844771992247026'/></Row><Row T='LineTo' IX='3' Del='1'/></Section></Shape><Shape ID='210' Type='Group' LineStyle='8' FillStyle='8' TextStyle='8'><Cell N='PinX' V='3.937194564498228'/><Cell N='PinY' V='4.952542104819705'/><Cell N='Width' V='0.2165354702260904'/><Cell N='Height' V='0.2165354702260904'/><Cell N='LocPinX' V='0.1082677351130452' F='Width*0.5'/><Cell N='LocPinY' V='0.1082677351130452' F='Height*0.5'/><Cell N='Angle' V='0'/><Cell N='FlipX' V='0'/><Cell N='FlipY' V='0'/><Cell N='ResizeMode' V='0'/><Cell N='QuickStyleVariation' V='2'/><Cell N='ObjType' V='8'/><Cell N='ShapeShdwShow' V='2'/><Shapes><Shape ID='211' NameU='Circle' Name='圆形' Type='Shape' Master='9'><Cell N='PinX' V='0.1082677351130452' F='Sheet.210!Width*0.5'/><Cell N='PinY' V='0.1082677351130452' F='Sheet.210!Height*0.5'/><Cell N='Width' V='0.2165354702260904' F='Sheet.210!Width*1'/><Cell N='Height' V='0.2165354702260904' F='Sheet.210!Height*1'/><Cell N='LocPinX' V='0.1082677351130452' F='Inh'/><Cell N='LocPinY' V='0.1082677351130452' F='Inh'/><Cell N='TxtPinX' V='0.1082677351130452' F='Inh'/><Cell N='TxtPinY' V='0.1082677351130452' F='Inh'/><Cell N='TxtWidth' V='0.1894685364478291' F='Inh'/><Cell N='TxtHeight' V='0.1624016026695678' F='Inh'/><Cell N='TxtLocPinX' V='0.09473426822391456' F='Inh'/><Cell N='TxtLocPinY' V='0.08120080133478391' F='Inh'/><Cell N='ObjType' V='1'/><Section N='Connection'><Row T='Connection' IX='0'><Cell N='X' V='0.1082677351130452' F='Inh'/><Cell N='Y' V='0.2165354702260904' F='Inh'/></Row><Row T='Connection' IX='1'><Cell N='X' V='0.1082677351130452' F='Inh'/><Cell N='Y' V='0.1082677351130452' F='Inh'/></Row><Row T='Connection' IX='2'><Cell N='Y' V='0.1082677351130452' F='Inh'/></Row><Row T='Connection' IX='3'><Cell N='X' V='0.1082677351130452' F='Inh'/></Row><Row T='Connection' IX='4'><Cell N='X' V='0.2165354702260904' F='Inh'/><Cell N='Y' V='0.1082677351130452' F='Inh'/></Row><Row T='Connection' IX='5'><Cell N='X' V='0.03170079284109964' F='Inh'/><Cell N='Y' V='0.03170079284109964' F='Inh'/></Row><Row T='Connection' IX='6'><Cell N='X' V='0.1848346773849908' F='Inh'/><Cell N='Y' V='0.03170079284109964' F='Inh'/></Row><Row T='Connection' IX='7'><Cell N='X' V='0.1848346773849908' F='Inh'/><Cell N='Y' V='0.1848346773849908' F='Inh'/></Row><Row T='Connection' IX='8'><Cell N='X' V='0.03170079284109964' F='Inh'/><Cell N='Y' V='0.1848346773849908' F='Inh'/></Row></Section><Section N='Geometry' IX='0'><Row T='MoveTo' IX='1'><Cell N='Y' V='0.1082677351130452' F='Inh'/></Row><Row T='EllipticalArcTo' IX='2'><Cell N='X' V='0.2165354702260904' F='Inh'/><Cell N='Y' V='0.1082677351130452' F='Inh'/><Cell N='A' V='0.1082677351130452' U='DL' F='Inh'/><Cell N='B' V='0.2165354702260904' U='DL' F='Inh'/></Row><Row T='EllipticalArcTo' IX='3'><Cell N='Y' V='0.1082677351130452' F='Inh'/><Cell N='A' V='0.1082677351130452' U='DL' F='Inh'/></Row></Section></Shape><Shape ID='212' NameU='Dynamic connector.11' IsCustomNameU='1' Name='动态连接线.11' IsCustomName='1' Type='Shape' Master='5'><Cell N='PinX' V='0.1082677351130452' F='Inh'/><Cell N='PinY' V='0.1082677351130452' F='Inh'/><Cell N='Width' V='0.1968503937007874' F='GUARD(0.19685039370079DL)'/><Cell N='Height' V='0.1968503937007874' F='GUARD(0.19685039370079DL)'/><Cell N='LocPinX' V='0.09842519685039369' F='Inh'/><Cell N='LocPinY' V='0.09842519685039369' F='Inh'/><Cell N='BeginX' V='0.03170079284109972' F='PAR(PNT(Sheet.211!Connections.X6,Sheet.211!Connections.Y6))'/><Cell N='BeginY' V='0.03170079284109928' F='PAR(PNT(Sheet.211!Connections.X6,Sheet.211!Connections.Y6))'/><Cell N='EndX' V='0.1848346773849907' F='PAR(PNT(Sheet.211!Connections.X8,Sheet.211!Connections.Y8))'/><Cell N='EndY' V='0.1848346773849912' F='PAR(PNT(Sheet.211!Connections.X8,Sheet.211!Connections.Y8))'/><Cell N='LayerMember' V='0'/><Cell N='BegTrigger' V='2' F='_XFTRIGGER(Sheet.211!EventXFMod)'/><Cell N='EndTrigger' V='2' F='_XFTRIGGER(Sheet.211!EventXFMod)'/><Cell N='ShapeRouteStyle' V='16'/><Cell N='ConLineRouteExt' V='1'/><Cell N='TxtPinX' V='0.09842519927769901' F='Inh'/><Cell N='TxtPinY' V='0.09842519927769904' F='Inh'/><Cell N='EndArrow' V='0'/><Section N='Control'><Row N='TextPosition'><Cell N='X' V='0.09842519927769901'/><Cell N='Y' V='0.09842519927769904'/><Cell N='XDyn' V='0.09842519927769901' F='Inh'/><Cell N='YDyn' V='0.09842519927769904' F='Inh'/></Row></Section><Section N='Geometry' IX='0'><Row T='MoveTo' IX='1'><Cell N='X' V='0.0218582545784482'/><Cell N='Y' V='0.0218582545784482'/></Row><Row T='LineTo' IX='2'><Cell N='X' V='0.1749921391223392'/><Cell N='Y' V='0.1749921391223392'/></Row><Row T='LineTo' IX='3' Del='1'/></Section></Shape><Shape ID='213' NameU='Dynamic connector.12' IsCustomNameU='1' Name='动态连接线.12' IsCustomName='1' Type='Shape' Master='5'><Cell N='PinX' V='0.1082677351130452' F='Inh'/><Cell N='PinY' V='0.1082677351130452' F='Inh'/><Cell N='Width' V='0.1968503937007874' F='GUARD(0.19685039370079DL)'/><Cell N='Height' V='-0.1968503937007874' F='GUARD(-0.19685039370079DL)'/><Cell N='LocPinX' V='0.09842519685039369' F='Inh'/><Cell N='LocPinY' V='-0.09842519685039369' F='Inh'/><Cell N='BeginX' V='0.03170079284109972' F='PAR(PNT(Sheet.211!Connections.X9,Sheet.211!Connections.Y9))'/><Cell N='BeginY' V='0.1848346773849912' F='PAR(PNT(Sheet.211!Connections.X9,Sheet.211!Connections.Y9))'/><Cell N='EndX' V='0.1848346773849907' F='PAR(PNT(Sheet.211!Connections.X7,Sheet.211!Connections.Y7))'/><Cell N='EndY' V='0.03170079284109928' F='PAR(PNT(Sheet.211!Connections.X7,Sheet.211!Connections.Y7))'/><Cell N='LayerMember' V='0'/><Cell N='BegTrigger' V='2' F='_XFTRIGGER(Sheet.211!EventXFMod)'/><Cell N='EndTrigger' V='2' F='_XFTRIGGER(Sheet.211!EventXFMod)'/><Cell N='ShapeRouteStyle' V='16'/><Cell N='ConLineRouteExt' V='1'/><Cell N='TxtPinX' V='0.09842519927769904' F='Inh'/><Cell N='TxtPinY' V='-0.09842519927769904' F='Inh'/><Cell N='EndArrow' V='0'/><Section N='Control'><Row N='TextPosition'><Cell N='X' V='0.09842519927769904'/><Cell N='Y' V='-0.09842519927769901'/><Cell N='XDyn' V='0.09842519927769904' F='Inh'/><Cell N='YDyn' V='-0.09842519927769904' F='Inh'/></Row></Section><Section N='Geometry' IX='0'><Row T='MoveTo' IX='1'><Cell N='X' V='0.0218582545784482'/><Cell N='Y' V='-0.0218582545784482'/></Row><Row T='LineTo' IX='2'><Cell N='X' V='0.1749921391223392'/><Cell N='Y' V='-0.1749921391223392'/></Row><Row T='LineTo' IX='3' Del='1'/></Section></Shape></Shapes></Shape><Shape ID='214' NameU='Dynamic connector.114' Name='动态连接线.19' IsCustomName='1' Type='Shape' Master='5'><Cell N='PinX' V='4.669944272267511' F='Inh'/><Cell N='PinY' V='4.950188421437563' F='Inh'/><Cell N='Width' V='1.248963945312477' F='GUARD(EndX-BeginX)'/><Cell N='Height' V='-0.1968503937007874' F='GUARD(-0.19685039370079DL)'/><Cell N='LocPinX' V='0.6244819726562385' F='Inh'/><Cell N='LocPinY' V='-0.09842519685039369' F='Inh'/><Cell N='BeginX' V='4.045462299611272' F='PAR(PNT(Sheet.211!Connections.X5,Sheet.211!Connections.Y5))'/><Cell N='BeginY' V='4.952542104819705' F='PAR(PNT(Sheet.211!Connections.X5,Sheet.211!Connections.Y5))'/><Cell N='EndX' V='5.294426244923749'/><Cell N='EndY' V='4.947834738055422'/><Cell N='LayerMember' V='0'/><Cell N='BegTrigger' V='2' F='_XFTRIGGER(Sheet.211!EventXFMod)'/><Cell N='EndTrigger' V='1' F='_XFTRIGGER(EventXFMod)'/><Cell N='TxtPinX' V='0.6221282892740996' F='Inh'/><Cell N='TxtPinY' V='-0.100778880232536' F='Inh'/><Cell N='FillForegnd' V='#000000' F='Inh'/><Cell N='FillBkgnd' V='#ffffff' F='Inh'/><Cell N='ShdwForegnd' V='#000000' F='Inh'/><Cell N='ShapeShdwShow' V='2'/><Section N='Control'><Row N='TextPosition'><Cell N='X' V='0.6221282892740991'/><Cell N='Y' V='-0.100778880232536'/><Cell N='XDyn' V='0.6221282892740996' F='Inh'/><Cell N='YDyn' V='-0.100778880232536' F='Inh'/></Row></Section><Section N='Geometry' IX='0'><Row T='MoveTo' IX='1'><Cell N='Y' V='-0.09607151346825216'/></Row><Row T='LineTo' IX='2'><Cell N='X' V='0.01845472440944906'/><Cell N='Y' V='-0.09607151346825216'/></Row><Row T='LineTo' IX='3'><Cell N='X' V='0.01845472440944906'/><Cell N='Y' V='-0.1007788802325358'/></Row><Row T='LineTo' IX='4'><Cell N='X' V='1.248963945312476'/><Cell N='Y' V='-0.1007788802325358'/></Row></Section></Shape><Shape ID='215' Type='Group' LineStyle='8' FillStyle='8' TextStyle='8'><Cell N='PinX' V='4.861873243933121'/><Cell N='PinY' V='4.445866256968494'/><Cell N='Width' V='0.2165354702260887'/><Cell N='Height' V='0.2165354702260887'/><Cell N='LocPinX' V='0.1082677351130443' F='Width*0.5'/><Cell N='LocPinY' V='0.1082677351130443' F='Height*0.5'/><Cell N='Angle' V='0'/><Cell N='FlipX' V='0'/><Cell N='FlipY' V='0'/><Cell N='ResizeMode' V='0'/><Cell N='QuickStyleVariation' V='2'/><Cell N='ObjType' V='8'/><Cell N='ShapeShdwShow' V='2'/><Shapes><Shape ID='216' NameU='Circle' Name='圆形' Type='Shape' Master='9'><Cell N='PinX' V='0.1082677351130443' F='Sheet.215!Width*0.5'/><Cell N='PinY' V='0.1082677351130443' F='Sheet.215!Height*0.5'/><Cell N='Width' V='0.2165354702260887' F='Sheet.215!Width*1'/><Cell N='Height' V='0.2165354702260887' F='Sheet.215!Height*1'/><Cell N='LocPinX' V='0.1082677351130443' F='Inh'/><Cell N='LocPinY' V='0.1082677351130443' F='Inh'/><Cell N='TxtPinX' V='0.1082677351130443' F='Inh'/><Cell N='TxtPinY' V='0.1082677351130443' F='Inh'/><Cell N='TxtWidth' V='0.1894685364478276' F='Inh'/><Cell N='TxtHeight' V='0.1624016026695665' F='Inh'/><Cell N='TxtLocPinX' V='0.09473426822391379' F='Inh'/><Cell N='TxtLocPinY' V='0.08120080133478325' F='Inh'/><Cell N='ObjType' V='1'/><Section N='Connection'><Row T='Connection' IX='0'><Cell N='X' V='0.1082677351130443' F='Inh'/><Cell N='Y' V='0.2165354702260887' F='Inh'/></Row><Row T='Connection' IX='1'><Cell N='X' V='0.1082677351130443' F='Inh'/><Cell N='Y' V='0.1082677351130443' F='Inh'/></Row><Row T='Connection' IX='2'><Cell N='Y' V='0.1082677351130443' F='Inh'/></Row><Row T='Connection' IX='3'><Cell N='X' V='0.1082677351130443' F='Inh'/></Row><Row T='Connection' IX='4'><Cell N='X' V='0.2165354702260887' F='Inh'/><Cell N='Y' V='0.1082677351130443' F='Inh'/></Row><Row T='Connection' IX='5'><Cell N='X' V='0.03170079284109938' F='Inh'/><Cell N='Y' V='0.03170079284109938' F='Inh'/></Row><Row T='Connection' IX='6'><Cell N='X' V='0.1848346773849893' F='Inh'/><Cell N='Y' V='0.03170079284109938' F='Inh'/></Row><Row T='Connection' IX='7'><Cell N='X' V='0.1848346773849893' F='Inh'/><Cell N='Y' V='0.1848346773849893' F='Inh'/></Row><Row T='Connection' IX='8'><Cell N='X' V='0.03170079284109938' F='Inh'/><Cell N='Y' V='0.1848346773849893' F='Inh'/></Row></Section><Section N='Geometry' IX='0'><Row T='MoveTo' IX='1'><Cell N='Y' V='0.1082677351130443' F='Inh'/></Row><Row T='EllipticalArcTo' IX='2'><Cell N='X' V='0.2165354702260887' F='Inh'/><Cell N='Y' V='0.1082677351130443' F='Inh'/><Cell N='A' V='0.1082677351130443' U='DL' F='Inh'/><Cell N='B' V='0.2165354702260887' U='DL' F='Inh'/></Row><Row T='EllipticalArcTo' IX='3'><Cell N='Y' V='0.1082677351130443' F='Inh'/><Cell N='A' V='0.1082677351130443' U='DL' F='Inh'/></Row></Section></Shape><Shape ID='217' NameU='Dynamic connector.11' IsCustomNameU='1' Name='动态连接线.11' IsCustomName='1' Type='Shape' Master='5'><Cell N='PinX' V='0.1082677351130443' F='Inh'/><Cell N='PinY' V='0.1082677351130443' F='Inh'/><Cell N='Width' V='0.1968503937007874' F='GUARD(0.19685039370079DL)'/><Cell N='Height' V='0.1968503937007874' F='GUARD(0.19685039370079DL)'/><Cell N='LocPinX' V='0.09842519685039369' F='Inh'/><Cell N='LocPinY' V='0.09842519685039369' F='Inh'/><Cell N='BeginX' V='0.03170079284109928' F='PAR(PNT(Sheet.216!Connections.X6,Sheet.216!Connections.Y6))'/><Cell N='BeginY' V='0.03170079284109928' F='PAR(PNT(Sheet.216!Connections.X6,Sheet.216!Connections.Y6))'/><Cell N='EndX' V='0.1848346773849894' F='PAR(PNT(Sheet.216!Connections.X8,Sheet.216!Connections.Y8))'/><Cell N='EndY' V='0.1848346773849894' F='PAR(PNT(Sheet.216!Connections.X8,Sheet.216!Connections.Y8))'/><Cell N='LayerMember' V='0'/><Cell N='BegTrigger' V='2' F='_XFTRIGGER(Sheet.216!EventXFMod)'/><Cell N='EndTrigger' V='2' F='_XFTRIGGER(Sheet.216!EventXFMod)'/><Cell N='ShapeRouteStyle' V='16'/><Cell N='ConLineRouteExt' V='1'/><Cell N='TxtPinX' V='0.09842519927769901' F='Inh'/><Cell N='TxtPinY' V='0.09842519927769904' F='Inh'/><Cell N='EndArrow' V='0'/><Section N='Control'><Row N='TextPosition'><Cell N='X' V='0.09842519927769901'/><Cell N='Y' V='0.09842519927769904'/><Cell N='XDyn' V='0.09842519927769901' F='Inh'/><Cell N='YDyn' V='0.09842519927769904' F='Inh'/></Row></Section><Section N='Geometry' IX='0'><Row T='MoveTo' IX='1'><Cell N='X' V='0.02185825457844864'/><Cell N='Y' V='0.02185825457844864'/></Row><Row T='LineTo' IX='2'><Cell N='X' V='0.1749921391223387'/><Cell N='Y' V='0.1749921391223387'/></Row><Row T='LineTo' IX='3' Del='1'/></Section></Shape><Shape ID='218' NameU='Dynamic connector.12' IsCustomNameU='1' Name='动态连接线.12' IsCustomName='1' Type='Shape' Master='5'><Cell N='PinX' V='0.1082677351130443' F='Inh'/><Cell N='PinY' V='0.1082677351130443' F='Inh'/><Cell N='Width' V='0.1968503937007874' F='GUARD(0.19685039370079DL)'/><Cell N='Height' V='-0.1968503937007874' F='GUARD(-0.19685039370079DL)'/><Cell N='LocPinX' V='0.09842519685039369' F='Inh'/><Cell N='LocPinY' V='-0.09842519685039369' F='Inh'/><Cell N='BeginX' V='0.03170079284109928' F='PAR(PNT(Sheet.216!Connections.X9,Sheet.216!Connections.Y9))'/><Cell N='BeginY' V='0.1848346773849894' F='PAR(PNT(Sheet.216!Connections.X9,Sheet.216!Connections.Y9))'/><Cell N='EndX' V='0.1848346773849894' F='PAR(PNT(Sheet.216!Connections.X7,Sheet.216!Connections.Y7))'/><Cell N='EndY' V='0.03170079284109928' F='PAR(PNT(Sheet.216!Connections.X7,Sheet.216!Connections.Y7))'/><Cell N='LayerMember' V='0'/><Cell N='BegTrigger' V='2' F='_XFTRIGGER(Sheet.216!EventXFMod)'/><Cell N='EndTrigger' V='2' F='_XFTRIGGER(Sheet.216!EventXFMod)'/><Cell N='ShapeRouteStyle' V='16'/><Cell N='ConLineRouteExt' V='1'/><Cell N='TxtPinX' V='0.09842519927769904' F='Inh'/><Cell N='TxtPinY' V='-0.09842519927769904' F='Inh'/><Cell N='EndArrow' V='0'/><Section N='Control'><Row N='TextPosition'><Cell N='X' V='0.09842519927769904'/><Cell N='Y' V='-0.09842519927769901'/><Cell N='XDyn' V='0.09842519927769904' F='Inh'/><Cell N='YDyn' V='-0.09842519927769904' F='Inh'/></Row></Section><Section N='Geometry' IX='0'><Row T='MoveTo' IX='1'><Cell N='X' V='0.02185825457844864'/><Cell N='Y' V='-0.02185825457844864'/></Row><Row T='LineTo' IX='2'><Cell N='X' V='0.1749921391223387'/><Cell N='Y' V='-0.1749921391223387'/></Row><Row T='LineTo' IX='3' Del='1'/></Section></Shape></Shapes></Shape><Shape ID='219' Type='Group' LineStyle='8' FillStyle='8' TextStyle='8'><Cell N='PinX' V='3.937436206432572'/><Cell N='PinY' V='4.44586626932814'/><Cell N='Width' V='0.2165354702260901'/><Cell N='Height' V='0.21653547022609'/><Cell N='LocPinX' V='0.108267735113045' F='Width*0.5'/><Cell N='LocPinY' V='0.108267735113045' F='Height*0.5'/><Cell N='Angle' V='0'/><Cell N='FlipX' V='0'/><Cell N='FlipY' V='0'/><Cell N='ResizeMode' V='0'/><Cell N='QuickStyleVariation' V='2'/><Cell N='ObjType' V='8'/><Cell N='ShapeShdwShow' V='2'/><Shapes><Shape ID='220' NameU='Circle' Name='圆形' Type='Shape' Master='9'><Cell N='PinX' V='0.108267735113045' F='Sheet.219!Width*0.5'/><Cell N='PinY' V='0.108267735113045' F='Sheet.219!Height*0.5'/><Cell N='Width' V='0.21653547022609' F='Sheet.219!Width*1'/><Cell N='Height' V='0.21653547022609' F='Sheet.219!Height*1'/><Cell N='LocPinX' V='0.108267735113045' F='Inh'/><Cell N='LocPinY' V='0.108267735113045' F='Inh'/><Cell N='TxtPinX' V='0.108267735113045' F='Inh'/><Cell N='TxtPinY' V='0.108267735113045' F='Inh'/><Cell N='TxtWidth' V='0.1894685364478288' F='Inh'/><Cell N='TxtHeight' V='0.1624016026695676' F='Inh'/><Cell N='TxtLocPinX' V='0.0947342682239144' F='Inh'/><Cell N='TxtLocPinY' V='0.08120080133478377' F='Inh'/><Cell N='ObjType' V='1'/><Section N='Connection'><Row T='Connection' IX='0'><Cell N='X' V='0.108267735113045' F='Inh'/><Cell N='Y' V='0.21653547022609' F='Inh'/></Row><Row T='Connection' IX='1'><Cell N='X' V='0.108267735113045' F='Inh'/><Cell N='Y' V='0.108267735113045' F='Inh'/></Row><Row T='Connection' IX='2'><Cell N='Y' V='0.108267735113045' F='Inh'/></Row><Row T='Connection' IX='3'><Cell N='X' V='0.108267735113045' F='Inh'/></Row><Row T='Connection' IX='4'><Cell N='X' V='0.21653547022609' F='Inh'/><Cell N='Y' V='0.108267735113045' F='Inh'/></Row><Row T='Connection' IX='5'><Cell N='X' V='0.03170079284109958' F='Inh'/><Cell N='Y' V='0.03170079284109958' F='Inh'/></Row><Row T='Connection' IX='6'><Cell N='X' V='0.1848346773849905' F='Inh'/><Cell N='Y' V='0.03170079284109958' F='Inh'/></Row><Row T='Connection' IX='7'><Cell N='X' V='0.1848346773849905' F='Inh'/><Cell N='Y' V='0.1848346773849905' F='Inh'/></Row><Row T='Connection' IX='8'><Cell N='X' V='0.03170079284109958' F='Inh'/><Cell N='Y' V='0.1848346773849905' F='Inh'/></Row></Section><Section N='Geometry' IX='0'><Row T='MoveTo' IX='1'><Cell N='Y' V='0.108267735113045' F='Inh'/></Row><Row T='EllipticalArcTo' IX='2'><Cell N='X' V='0.21653547022609' F='Inh'/><Cell N='Y' V='0.108267735113045' F='Inh'/><Cell N='A' V='0.108267735113045' U='DL' F='Inh'/><Cell N='B' V='0.21653547022609' U='DL' F='Inh'/></Row><Row T='EllipticalArcTo' IX='3'><Cell N='Y' V='0.108267735113045' F='Inh'/><Cell N='A' V='0.108267735113045' U='DL' F='Inh'/></Row></Section></Shape><Shape ID='221' NameU='Dynamic connector.11' IsCustomNameU='1' Name='动态连接线.11' IsCustomName='1' Type='Shape' Master='5'><Cell N='PinX' V='0.108267735113045' F='Inh'/><Cell N='PinY' V='0.1082677351130448' F='Inh'/><Cell N='Width' V='0.1968503937007874' F='GUARD(0.19685039370079DL)'/><Cell N='Height' V='0.1968503937007874' F='GUARD(0.19685039370079DL)'/><Cell N='LocPinX' V='0.09842519685039369' F='Inh'/><Cell N='LocPinY' V='0.09842519685039369' F='Inh'/><Cell N='BeginX' V='0.03170079284109972' F='PAR(PNT(Sheet.220!Connections.X6,Sheet.220!Connections.Y6))'/><Cell N='BeginY' V='0.03170079284109928' F='PAR(PNT(Sheet.220!Connections.X6,Sheet.220!Connections.Y6))'/><Cell N='EndX' V='0.1848346773849903' F='PAR(PNT(Sheet.220!Connections.X8,Sheet.220!Connections.Y8))'/><Cell N='EndY' V='0.1848346773849903' F='PAR(PNT(Sheet.220!Connections.X8,Sheet.220!Connections.Y8))'/><Cell N='LayerMember' V='0'/><Cell N='BegTrigger' V='2' F='_XFTRIGGER(Sheet.220!EventXFMod)'/><Cell N='EndTrigger' V='2' F='_XFTRIGGER(Sheet.220!EventXFMod)'/><Cell N='ShapeRouteStyle' V='16'/><Cell N='ConLineRouteExt' V='1'/><Cell N='TxtPinX' V='0.09842519927769902' F='Inh'/><Cell N='TxtPinY' V='0.09842519927769902' F='Inh'/><Cell N='EndArrow' V='0'/><Section N='Control'><Row N='TextPosition'><Cell N='X' V='0.09842519927769902'/><Cell N='Y' V='0.09842519927769902'/><Cell N='XDyn' V='0.09842519927769902' F='Inh'/><Cell N='YDyn' V='0.09842519927769902' F='Inh'/></Row></Section><Section N='Geometry' IX='0'><Row T='MoveTo' IX='1'><Cell N='X' V='0.0218582545784482'/><Cell N='Y' V='0.0218582545784482'/></Row><Row T='LineTo' IX='2'><Cell N='X' V='0.1749921391223392'/><Cell N='Y' V='0.1749921391223392'/></Row><Row T='LineTo' IX='3' Del='1'/></Section></Shape><Shape ID='222' NameU='Dynamic connector.12' IsCustomNameU='1' Name='动态连接线.12' IsCustomName='1' Type='Shape' Master='5'><Cell N='PinX' V='0.108267735113045' F='Inh'/><Cell N='PinY' V='0.1082677351130448' F='Inh'/><Cell N='Width' V='0.1968503937007874' F='GUARD(0.19685039370079DL)'/><Cell N='Height' V='-0.1968503937007874' F='GUARD(-0.19685039370079DL)'/><Cell N='LocPinX' V='0.09842519685039369' F='Inh'/><Cell N='LocPinY' V='-0.09842519685039369' F='Inh'/><Cell N='BeginX' V='0.03170079284109972' F='PAR(PNT(Sheet.220!Connections.X9,Sheet.220!Connections.Y9))'/><Cell N='BeginY' V='0.1848346773849903' F='PAR(PNT(Sheet.220!Connections.X9,Sheet.220!Connections.Y9))'/><Cell N='EndX' V='0.1848346773849903' F='PAR(PNT(Sheet.220!Connections.X7,Sheet.220!Connections.Y7))'/><Cell N='EndY' V='0.03170079284109928' F='PAR(PNT(Sheet.220!Connections.X7,Sheet.220!Connections.Y7))'/><Cell N='LayerMember' V='0'/><Cell N='BegTrigger' V='2' F='_XFTRIGGER(Sheet.220!EventXFMod)'/><Cell N='EndTrigger' V='2' F='_XFTRIGGER(Sheet.220!EventXFMod)'/><Cell N='ShapeRouteStyle' V='16'/><Cell N='ConLineRouteExt' V='1'/><Cell N='TxtPinX' V='0.09842519927769902' F='Inh'/><Cell N='TxtPinY' V='-0.09842519927769902' F='Inh'/><Cell N='EndArrow' V='0'/><Section N='Control'><Row N='TextPosition'><Cell N='X' V='0.09842519927769902'/><Cell N='Y' V='-0.09842519927769902'/><Cell N='XDyn' V='0.09842519927769902' F='Inh'/><Cell N='YDyn' V='-0.09842519927769902' F='Inh'/></Row></Section><Section N='Geometry' IX='0'><Row T='MoveTo' IX='1'><Cell N='X' V='0.0218582545784482'/><Cell N='Y' V='-0.0218582545784482'/></Row><Row T='LineTo' IX='2'><Cell N='X' V='0.1749921391223392'/><Cell N='Y' V='-0.1749921391223392'/></Row><Row T='LineTo' IX='3' Del='1'/></Section></Shape></Shapes></Shape><Shape ID='223' NameU='Dynamic connector.123' Name='动态连接线.36' IsCustomName='1' Type='Shape' Master='5'><Cell N='PinX' V='3.9373153854654' F='Inh'/><Cell N='PinY' V='4.699204187073923' U='MM' F='Inh'/><Cell N='Width' V='-0.1968503937007874' F='GUARD(-0.19685039370079DL)'/><Cell N='Height' V='0.2901403652654757' U='MM' F='GUARD(EndY-BeginY)'/><Cell N='LocPinX' V='-0.09842519685039369' F='Inh'/><Cell N='LocPinY' V='0.1450701826327379' U='MM' F='Inh'/><Cell N='BeginX' V='3.937436206432572' F='PAR(PNT(Sheet.220!Connections.X1,Sheet.220!Connections.Y1))'/><Cell N='BeginY' V='4.554134004441185' F='PAR(PNT(Sheet.220!Connections.X1,Sheet.220!Connections.Y1))'/><Cell N='EndX' V='3.937194564498228' F='PAR(PNT(Sheet.211!Connections.X4,Sheet.211!Connections.Y4))'/><Cell N='EndY' V='4.84427436970666' U='MM' F='PAR(PNT(Sheet.211!Connections.X4,Sheet.211!Connections.Y4))'/><Cell N='LayerMember' V='0'/><Cell N='BegTrigger' V='2' F='_XFTRIGGER(Sheet.220!EventXFMod)'/><Cell N='EndTrigger' V='2' F='_XFTRIGGER(Sheet.211!EventXFMod)'/><Cell N='TxtPinX' V='-0.09830437588322052' F='Inh'/><Cell N='TxtPinY' V='0.1451910035999103' F='Inh'/><Cell N='FillForegnd' V='#000000' F='Inh'/><Cell N='FillBkgnd' V='#ffffff' F='Inh'/><Cell N='ShdwForegnd' V='#000000' F='Inh'/><Cell N='ShapeShdwShow' V='2'/><Section N='Control'><Row N='TextPosition'><Cell N='X' V='-0.09830437588322052'/><Cell N='Y' V='0.1451910035999103'/><Cell N='XDyn' V='-0.09830437588322052' F='Inh'/><Cell N='YDyn' V='0.1451910035999103' F='Inh'/></Row></Section><Section N='Geometry' IX='0'><Row T='MoveTo' IX='1'><Cell N='X' V='-0.09830437588322116'/></Row><Row T='LineTo' IX='2'><Cell N='X' V='-0.09830437588322116'/><Cell N='Y' V='0.1476377952755907'/></Row><Row T='LineTo' IX='3'><Cell N='X' V='-0.09854601781756589'/><Cell N='Y' V='0.1476377952755907'/></Row><Row T='LineTo' IX='4'><Cell N='X' V='-0.09854601781756589'/><Cell N='Y' V='0.2901403652654739'/></Row></Section></Shape><Shape ID='224' NameU='Rectangle' Name='矩形' Type='Shape' Master='4'><Cell N='PinX' V='3.188126882287019'/><Cell N='PinY' V='3.983267518107532'/><Cell N='Width' V='0.2165354702260904'/><Cell N='Height' V='0.23622047026656'/><Cell N='LocPinX' V='0.1082677351130452' F='Inh'/><Cell N='LocPinY' V='0.11811023513328' F='Inh'/><Cell N='ObjType' V='1'/><Cell N='ShapeShdwShow' V='2'/><Section N='Connection'><Row T='Connection' IX='0'><Cell N='X' V='0.1082677351130452' F='Inh'/></Row><Row T='Connection' IX='1'><Cell N='X' V='0.2165354702260904' F='Inh'/><Cell N='Y' V='0.11811023513328' F='Inh'/></Row><Row T='Connection' IX='2'><Cell N='X' V='0.1082677351130452' F='Inh'/><Cell N='Y' V='0.23622047026656' F='Inh'/></Row><Row T='Connection' IX='3'><Cell N='Y' V='0.11811023513328' F='Inh'/></Row><Row T='Connection' IX='4'><Cell N='X' V='0.1082677351130452' F='Inh'/><Cell N='Y' V='0.11811023513328' F='Inh'/></Row></Section><Section N='Geometry' IX='0'><Row T='LineTo' IX='2'><Cell N='X' V='0.2165354702260904' F='Inh'/></Row><Row T='LineTo' IX='3'><Cell N='X' V='0.2165354702260904' F='Inh'/><Cell N='Y' V='0.23622047026656' F='Inh'/></Row><Row T='LineTo' IX='4'><Cell N='Y' V='0.23622047026656' F='Inh'/></Row></Section></Shape><Shape ID='225' NameU='Dynamic connector.45' IsCustomNameU='1' Name='动态连接线.45' IsCustomName='1' Type='Shape' Master='5'><Cell N='PinX' V='3.186831802992968' F='Inh'/><Cell N='PinY' V='4.472803538401659' U='MM' F='Inh'/><Cell N='Width' V='-0.1968503937007874' F='GUARD(-0.19685039370079DL)'/><Cell N='Height' V='0.7428515703216938' U='MM' F='GUARD(EndY-BeginY)'/><Cell N='LocPinX' V='-0.09842519685039369' F='Inh'/><Cell N='LocPinY' V='0.3714257851608469' U='MM' F='Inh'/><Cell N='BeginX' V='3.188126882287019' F='PAR(PNT(Sheet.224!Connections.X3,Sheet.224!Connections.Y3))'/><Cell N='BeginY' V='4.101377753240812' F='PAR(PNT(Sheet.224!Connections.X3,Sheet.224!Connections.Y3))'/><Cell N='EndX' V='3.185536723698917' F='PAR(PNT(Sheet.206!Connections.X4,Sheet.206!Connections.Y4))'/><Cell N='EndY' V='4.844229323562506' U='MM' F='PAR(PNT(Sheet.206!Connections.X4,Sheet.206!Connections.Y4))'/><Cell N='LayerMember' V='0'/><Cell N='BegTrigger' V='2' F='_XFTRIGGER(Sheet.224!EventXFMod)'/><Cell N='EndTrigger' V='2' F='_XFTRIGGER(Sheet.206!EventXFMod)'/><Cell N='TxtPinX' V='-0.09842519834637642' F='Inh'/><Cell N='TxtPinY' V='0.3714257776737213' F='Inh'/><Cell N='ConFixedCode' V='3'/><Cell N='FillForegnd' V='#000000' F='Inh'/><Cell N='FillBkgnd' V='#ffffff' F='Inh'/><Cell N='ShdwForegnd' V='#000000' F='Inh'/><Cell N='ShapeShdwShow' V='2'/><Section N='Control'><Row N='TextPosition'><Cell N='X' V='-0.09842519834637642'/><Cell N='Y' V='0.3714257776737213'/><Cell N='XDyn' V='-0.09842519834637642' F='Inh'/><Cell N='YDyn' V='0.3714257776737213' F='Inh'/></Row></Section><Section N='Geometry' IX='0'><Row T='MoveTo' IX='1'><Cell N='X' V='-0.09713011755634238'/></Row><Row T='LineTo' IX='2'><Cell N='X' V='-0.09972027614444468'/><Cell N='Y' V='0.7428515703216965'/></Row><Row T='LineTo' IX='3' Del='1'/></Section></Shape><Shape ID='226' NameU='Rectangle.126' Name='矩形.53' IsCustomName='1' Type='Shape' Master='4'><Cell N='PinX' V='3.578546855651386'/><Cell N='PinY' V='3.983267518107531'/><Cell N='Width' V='0.2165354702260904'/><Cell N='Height' V='0.23622047026656'/><Cell N='LocPinX' V='0.1082677351130452' F='Inh'/><Cell N='LocPinY' V='0.11811023513328' F='Inh'/><Cell N='ObjType' V='1'/><Cell N='ShapeShdwShow' V='2'/><Section N='Connection'><Row T='Connection' IX='0'><Cell N='X' V='0.1082677351130452' F='Inh'/></Row><Row T='Connection' IX='1'><Cell N='X' V='0.2165354702260904' F='Inh'/><Cell N='Y' V='0.11811023513328' F='Inh'/></Row><Row T='Connection' IX='2'><Cell N='X' V='0.1082677351130452' F='Inh'/><Cell N='Y' V='0.23622047026656' F='Inh'/></Row><Row T='Connection' IX='3'><Cell N='Y' V='0.11811023513328' F='Inh'/></Row><Row T='Connection' IX='4'><Cell N='X' V='0.1082677351130452' F='Inh'/><Cell N='Y' V='0.11811023513328' F='Inh'/></Row></Section><Section N='Geometry' IX='0'><Row T='LineTo' IX='2'><Cell N='X' V='0.2165354702260904' F='Inh'/></Row><Row T='LineTo' IX='3'><Cell N='X' V='0.2165354702260904' F='Inh'/><Cell N='Y' V='0.23622047026656' F='Inh'/></Row><Row T='LineTo' IX='4'><Cell N='Y' V='0.23622047026656' F='Inh'/></Row></Section></Shape><Shape ID='227' NameU='Rectangle.127' Name='矩形.56' IsCustomName='1' Type='Shape' Master='4'><Cell N='PinX' V='3.937470762875172'/><Cell N='PinY' V='3.983267518107531'/><Cell N='Width' V='0.3468503937007874'/><Cell N='Height' V='0.23622047026656'/><Cell N='LocPinX' V='0.1734251968503937' F='Inh'/><Cell N='LocPinY' V='0.11811023513328' F='Inh'/><Cell N='ObjType' V='1'/><Cell N='ShapeShdwShow' V='2'/><Section N='Connection'><Row T='Connection' IX='0'><Cell N='X' V='0.1734251968503937' F='Inh'/></Row><Row T='Connection' IX='1'><Cell N='X' V='0.3468503937007874' F='Inh'/><Cell N='Y' V='0.11811023513328' F='Inh'/></Row><Row T='Connection' IX='2'><Cell N='X' V='0.1734251968503937' F='Inh'/><Cell N='Y' V='0.23622047026656' F='Inh'/></Row><Row T='Connection' IX='3'><Cell N='Y' V='0.11811023513328' F='Inh'/></Row><Row T='Connection' IX='4'><Cell N='X' V='0.1734251968503937' F='Inh'/><Cell N='Y' V='0.11811023513328' F='Inh'/></Row></Section><Section N='Geometry' IX='0'><Row T='LineTo' IX='2'><Cell N='X' V='0.3468503937007874' F='Inh'/></Row><Row T='LineTo' IX='3'><Cell N='X' V='0.3468503937007874' F='Inh'/><Cell N='Y' V='0.23622047026656' F='Inh'/></Row><Row T='LineTo' IX='4'><Cell N='Y' V='0.23622047026656' F='Inh'/></Row></Section></Shape><Shape ID='228' NameU='Rectangle.128' Name='矩形.58' IsCustomName='1' Type='Shape' Master='4'><Cell N='PinX' V='4.438126912276561'/><Cell N='PinY' V='3.983267518107531'/><Cell N='Width' V='0.2165354702260904'/><Cell N='Height' V='0.23622047026656'/><Cell N='LocPinX' V='0.1082677351130452' F='Inh'/><Cell N='LocPinY' V='0.11811023513328' F='Inh'/><Cell N='ObjType' V='1'/><Cell N='ShapeShdwShow' V='2'/><Section N='Connection'><Row T='Connection' IX='0'><Cell N='X' V='0.1082677351130452' F='Inh'/></Row><Row T='Connection' IX='1'><Cell N='X' V='0.2165354702260904' F='Inh'/><Cell N='Y' V='0.11811023513328' F='Inh'/></Row><Row T='Connection' IX='2'><Cell N='X' V='0.1082677351130452' F='Inh'/><Cell N='Y' V='0.23622047026656' F='Inh'/></Row><Row T='Connection' IX='3'><Cell N='Y' V='0.11811023513328' F='Inh'/></Row><Row T='Connection' IX='4'><Cell N='X' V='0.1082677351130452' F='Inh'/><Cell N='Y' V='0.11811023513328' F='Inh'/></Row></Section><Section N='Geometry' IX='0'><Row T='LineTo' IX='2'><Cell N='X' V='0.2165354702260904' F='Inh'/></Row><Row T='LineTo' IX='3'><Cell N='X' V='0.2165354702260904' F='Inh'/><Cell N='Y' V='0.23622047026656' F='Inh'/></Row><Row T='LineTo' IX='4'><Cell N='Y' V='0.23622047026656' F='Inh'/></Row></Section></Shape><Shape ID='229' NameU='Dynamic connector.129' Name='动态连接线.59' IsCustomName='1' Type='Shape' Master='5'><Cell N='PinX' V='3.703857663485457' U='MM' F='Inh'/><Cell N='PinY' V='4.273622011284475' F='Inh'/><Cell N='Width' V='0.250621615668142' U='MM' F='GUARD(EndX-BeginX)'/><Cell N='Height' V='0.3444885160873294' F='GUARD(EndY-BeginY)'/><Cell N='LocPinX' V='0.125310807834071' U='MM' F='Inh'/><Cell N='LocPinY' V='0.1722442580436647' F='Inh'/><Cell N='BeginX' V='3.578546855651386' F='PAR(PNT(Sheet.226!Connections.X3,Sheet.226!Connections.Y3))'/><Cell N='BeginY' V='4.10137775324081' F='PAR(PNT(Sheet.226!Connections.X3,Sheet.226!Connections.Y3))'/><Cell N='EndX' V='3.829168471319528' U='MM' F='PAR(PNT(Sheet.220!Connections.X3,Sheet.220!Connections.Y3))'/><Cell N='EndY' V='4.44586626932814' F='PAR(PNT(Sheet.220!Connections.X3,Sheet.220!Connections.Y3))'/><Cell N='LayerMember' V='0'/><Cell N='BegTrigger' V='2' F='_XFTRIGGER(Sheet.226!EventXFMod)'/><Cell N='EndTrigger' V='2' F='_XFTRIGGER(Sheet.220!EventXFMod)'/><Cell N='TxtPinY' V='0.2975550658777355' F='Inh'/><Cell N='FillForegnd' V='#000000' F='Inh'/><Cell N='FillBkgnd' V='#ffffff' F='Inh'/><Cell N='ShdwForegnd' V='#000000' F='Inh'/><Cell N='ShapeShdwShow' V='2'/><Section N='Control'><Row N='TextPosition'><Cell N='Y' V='0.2975550658777353'/><Cell N='YDyn' V='0.2975550658777355' F='Inh'/></Row></Section><Section N='Geometry' IX='0'><Row T='LineTo' IX='2'><Cell N='Y' V='0.3444885160873286'/></Row><Row T='LineTo' IX='3'><Cell N='X' V='0.2506216156681411'/><Cell N='Y' V='0.3444885160873286'/></Row></Section></Shape><Shape ID='230' NameU='Dynamic connector.130' Name='动态连接线.60' IsCustomName='1' Type='Shape' Master='5'><Cell N='PinX' V='3.937453484653872' F='Inh'/><Cell N='PinY' V='4.219488143727952' U='MM' F='Inh'/><Cell N='Width' V='-0.1968503937007874' F='GUARD(-0.19685039370079DL)'/><Cell N='Height' V='0.2362207809742847' U='MM' F='GUARD(EndY-BeginY)'/><Cell N='LocPinX' V='-0.09842519685039369' F='Inh'/><Cell N='LocPinY' V='0.1181103904871423' U='MM' F='Inh'/><Cell N='BeginX' V='3.937470762875172' F='PAR(PNT(Sheet.227!Connections.X3,Sheet.227!Connections.Y3))'/><Cell N='BeginY' V='4.10137775324081' F='PAR(PNT(Sheet.227!Connections.X3,Sheet.227!Connections.Y3))'/><Cell N='EndX' V='3.937436206432572' F='PAR(PNT(Sheet.220!Connections.X4,Sheet.220!Connections.Y4))'/><Cell N='EndY' V='4.337598534215095' U='MM' F='PAR(PNT(Sheet.220!Connections.X4,Sheet.220!Connections.Y4))'/><Cell N='LayerMember' V='0'/><Cell N='BegTrigger' V='2' F='_XFTRIGGER(Sheet.227!EventXFMod)'/><Cell N='EndTrigger' V='2' F='_XFTRIGGER(Sheet.220!EventXFMod)'/><Cell N='TxtPinX' V='-0.09844247507169257' F='Inh'/><Cell N='TxtPinY' V='0.1180931122658431' F='Inh'/><Cell N='EndArrow' V='0'/><Cell N='FillForegnd' V='#000000' F='Inh'/><Cell N='FillBkgnd' V='#ffffff' F='Inh'/><Cell N='ShdwForegnd' V='#000000' F='Inh'/><Cell N='ShapeShdwShow' V='2'/><Section N='Control'><Row N='TextPosition'><Cell N='X' V='-0.09844247507169257'/><Cell N='Y' V='0.1180931122658431'/><Cell N='XDyn' V='-0.09844247507169257' F='Inh'/><Cell N='YDyn' V='0.1180931122658431' F='Inh'/></Row></Section><Section N='Geometry' IX='0'><Row T='MoveTo' IX='1'><Cell N='X' V='-0.09840791862909359'/></Row><Row T='LineTo' IX='2'><Cell N='X' V='-0.09840791862909359'/><Cell N='Y' V='0.07381889763779537'/></Row><Row T='LineTo' IX='3'><Cell N='X' V='-0.09844247507169346'/><Cell N='Y' V='0.07381889763779537'/></Row><Row T='LineTo' IX='4'><Cell N='X' V='-0.09844247507169346'/><Cell N='Y' V='0.2362207809742838'/></Row></Section></Shape><Shape ID='231' NameU='Rectangle.131' Name='矩形.61' IsCustomName='1' Type='Shape' Master='4'><Cell N='PinX' V='4.861355235485639'/><Cell N='PinY' V='4.770669173858718'/><Cell N='Width' V='0.3641732054200788'/><Cell N='Height' V='0.23622047026656'/><Cell N='LocPinX' V='0.1820866027100394' F='Inh'/><Cell N='LocPinY' V='0.11811023513328' F='Inh'/><Cell N='ObjType' V='1'/><Cell N='ShapeShdwShow' V='2'/><Section N='Connection'><Row T='Connection' IX='0'><Cell N='X' V='0.1820866027100394' F='Inh'/></Row><Row T='Connection' IX='1'><Cell N='X' V='0.3641732054200788' F='Inh'/><Cell N='Y' V='0.11811023513328' F='Inh'/></Row><Row T='Connection' IX='2'><Cell N='X' V='0.1820866027100394' F='Inh'/><Cell N='Y' V='0.23622047026656' F='Inh'/></Row><Row T='Connection' IX='3'><Cell N='Y' V='0.11811023513328' F='Inh'/></Row><Row T='Connection' IX='4'><Cell N='X' V='0.1820866027100394' F='Inh'/><Cell N='Y' V='0.11811023513328' F='Inh'/></Row></Section><Section N='Geometry' IX='0'><Row T='LineTo' IX='2'><Cell N='X' V='0.3641732054200788' F='Inh'/></Row><Row T='LineTo' IX='3'><Cell N='X' V='0.3641732054200788' F='Inh'/><Cell N='Y' V='0.23622047026656' F='Inh'/></Row><Row T='LineTo' IX='4'><Cell N='Y' V='0.23622047026656' F='Inh'/></Row></Section></Shape><Shape ID='232' NameU='Dynamic connector.132' Name='动态连接线.62' IsCustomName='1' Type='Shape' Master='5'><Cell N='PinX' V='4.595866210548319' U='MM' F='Inh'/><Cell N='PinY' V='4.273622005104652' F='Inh'/><Cell N='Width' V='0.3154785965435156' U='MM' F='GUARD(EndX-BeginX)'/><Cell N='Height' V='0.3444885037276837' F='GUARD(EndY-BeginY)'/><Cell N='LocPinX' V='0.1577392982717578' U='MM' F='Inh'/><Cell N='LocPinY' V='0.1722442518638419' F='Inh'/><Cell N='BeginX' V='4.438126912276561' F='PAR(PNT(Sheet.228!Connections.X3,Sheet.228!Connections.Y3))'/><Cell N='BeginY' V='4.10137775324081' F='PAR(PNT(Sheet.228!Connections.X3,Sheet.228!Connections.Y3))'/><Cell N='EndX' V='4.753605508820077' U='MM' F='PAR(PNT(Sheet.216!Connections.X3,Sheet.216!Connections.Y3))'/><Cell N='EndY' V='4.445866256968494' F='PAR(PNT(Sheet.216!Connections.X3,Sheet.216!Connections.Y3))'/><Cell N='LayerMember' V='0'/><Cell N='BegTrigger' V='2' F='_XFTRIGGER(Sheet.228!EventXFMod)'/><Cell N='EndTrigger' V='2' F='_XFTRIGGER(Sheet.216!EventXFMod)'/><Cell N='TxtPinY' V='0.3299835501355978' F='Inh'/><Cell N='FillForegnd' V='#000000' F='Inh'/><Cell N='FillBkgnd' V='#ffffff' F='Inh'/><Cell N='ShdwForegnd' V='#000000' F='Inh'/><Cell N='ShapeShdwShow' V='2'/><Section N='Control'><Row N='TextPosition'><Cell N='Y' V='0.3299835501355979'/><Cell N='YDyn' V='0.3299835501355978' F='Inh'/></Row></Section><Section N='Geometry' IX='0'><Row T='LineTo' IX='2'><Cell N='Y' V='0.3444885037276828'/></Row><Row T='LineTo' IX='3'><Cell N='X' V='0.3154785965435139'/><Cell N='Y' V='0.3444885037276828'/></Row></Section></Shape><Shape ID='233' NameU='Dynamic connector.133' Name='动态连接线.63' IsCustomName='1' Type='Shape' Master='5'><Cell N='PinX' V='4.86161423970938' F='Inh'/><Cell N='PinY' V='4.603346465403488' U='MM' F='Inh'/><Cell N='Width' V='-0.1968503937007874' F='GUARD(-0.19685039370079DL)'/><Cell N='Height' V='0.1968503937007874' F='GUARD(0.19685039370079DL)'/><Cell N='LocPinX' V='-0.09842519685039369' F='Inh'/><Cell N='LocPinY' V='0.09842519685039369' F='Inh'/><Cell N='BeginX' V='4.861873243933121' F='PAR(PNT(Sheet.216!Connections.X1,Sheet.216!Connections.Y1))'/><Cell N='BeginY' V='4.554133992081539' F='PAR(PNT(Sheet.216!Connections.X1,Sheet.216!Connections.Y1))'/><Cell N='EndX' V='4.861355235485639' F='PAR(PNT(Sheet.231!Connections.X1,Sheet.231!Connections.Y1))'/><Cell N='EndY' V='4.652558938725439' U='MM' F='PAR(PNT(Sheet.231!Connections.X1,Sheet.231!Connections.Y1))'/><Cell N='LayerMember' V='0'/><Cell N='BegTrigger' V='2' F='_XFTRIGGER(Sheet.216!EventXFMod)'/><Cell N='EndTrigger' V='2' F='_XFTRIGGER(Sheet.231!EventXFMod)'/><Cell N='TxtPinX' V='-0.09868420107413423' F='Inh'/><Cell N='TxtPinY' V='0.09816619262665334' F='Inh'/><Cell N='EndArrow' V='0'/><Cell N='FillForegnd' V='#000000' F='Inh'/><Cell N='FillBkgnd' V='#ffffff' F='Inh'/><Cell N='ShdwForegnd' V='#000000' F='Inh'/><Cell N='ShapeShdwShow' V='2'/><Section N='Control'><Row N='TextPosition'><Cell N='X' V='-0.09868420107413511'/><Cell N='Y' V='0.0981661926266529'/><Cell N='XDyn' V='-0.09868420107413423' F='Inh'/><Cell N='YDyn' V='0.09816619262665334' F='Inh'/></Row></Section><Section N='Geometry' IX='0'><Row T='MoveTo' IX='1'><Cell N='X' V='-0.09816619262665238'/><Cell N='Y' V='0.04921272352844408'/></Row><Row T='LineTo' IX='2'><Cell N='X' V='-0.09816619262665238'/><Cell N='Y' V='0.08612217234734132'/></Row><Row T='LineTo' IX='3'><Cell N='X' V='-0.09868420107413556'/><Cell N='Y' V='0.08612217234734132'/></Row><Row T='LineTo' IX='4'><Cell N='X' V='-0.09868420107413556'/><Cell N='Y' V='0.1476376701723439'/></Row></Section></Shape><Shape ID='234' NameU='Dynamic connector.134' Name='动态连接线.64' IsCustomName='1' Type='Shape' Master='5'><Cell N='PinX' V='3.188290984465096' F='Inh'/><Cell N='PinY' V='3.657152112404072' F='Inh'/><Cell N='Width' V='0.1968503937007874' F='GUARD(0.19685039370079DL)'/><Cell N='Height' V='-0.1968503937007874' F='GUARD(-0.19685039370079DL)'/><Cell N='LocPinX' V='0.09842519685039369' F='Inh'/><Cell N='LocPinY' V='-0.09842519685039369' F='Inh'/><Cell N='BeginX' V='3.188126955392264'/><Cell N='BeginY' V='3.707677046787274'/><Cell N='EndX' V='3.188455013537929' F='PAR(PNT(Sheet.241!Connections.X1,Sheet.241!Connections.Y1))'/><Cell N='EndY' V='3.606627178020869' F='PAR(PNT(Sheet.241!Connections.X1,Sheet.241!Connections.Y1))'/><Cell N='LayerMember' V='0'/><Cell N='BegTrigger' V='1' F='_XFTRIGGER(EventXFMod)'/><Cell N='EndTrigger' V='2' F='_XFTRIGGER(Sheet.241!EventXFMod)'/><Cell N='ConFixedCode' V='3'/><Cell N='TxtPinX' V='0.09842519834637642' F='Inh'/><Cell N='TxtPinY' V='-0.09842519648373116' F='Inh'/><Cell N='EndArrow' V='0'/><Cell N='FillForegnd' V='#000000' F='Inh'/><Cell N='FillBkgnd' V='#ffffff' F='Inh'/><Cell N='ShdwForegnd' V='#000000' F='Inh'/><Cell N='ShapeShdwShow' V='2'/><Section N='Control'><Row N='TextPosition'><Cell N='X' V='0.09842519834637642'/><Cell N='Y' V='-0.09842519648373116'/><Cell N='XDyn' V='0.09842519834637642' F='Inh'/><Cell N='YDyn' V='-0.09842519648373116' F='Inh'/></Row></Section><Section N='Geometry' IX='0'><Row T='MoveTo' IX='1'><Cell N='X' V='0.09826116777756022'/><Cell N='Y' V='-0.04790026246719092'/></Row><Row T='LineTo' IX='2'><Cell N='X' V='0.09858922592322683'/><Cell N='Y' V='-0.1489501312335966'/></Row><Row T='LineTo' IX='3' Del='1'/></Section></Shape><Shape ID='235' NameU='Dynamic connector.135' Name='动态连接线.65' IsCustomName='1' Type='Shape' Master='5'><Cell N='PinX' V='3.060174169357138' F='Inh'/><Cell N='PinY' V='3.784627431974594' F='Inh'/><Cell N='Width' V='0.255905425859762' F='GUARD(EndX-BeginX)'/><Cell N='Height' V='0.1968503937007874' F='GUARD(0.19685039370079DL)'/><Cell N='LocPinX' V='0.1279527129298812' F='Inh'/><Cell N='LocPinY' V='0.09842519685039369' F='Inh'/><Cell N='BeginX' V='2.932221456427257'/><Cell N='BeginY' V='3.709824410515677'/><Cell N='EndX' V='3.188126882287019'/><Cell N='EndY' V='3.85943045343351'/><Cell N='LayerMember' V='0'/><Cell N='BegTrigger' V='1' F='_XFTRIGGER(EventXFMod)'/><Cell N='EndTrigger' V='1' F='_XFTRIGGER(EventXFMod)'/><Cell N='ConFixedCode' V='3'/><Cell N='TxtPinX' V='0.2027557343887979' F='Inh'/><Cell N='TxtPinY' V='0.02362217539147721' F='Inh'/><Cell N='EndArrow' V='0'/><Cell N='FillForegnd' V='#000000' F='Inh'/><Cell N='FillBkgnd' V='#ffffff' F='Inh'/><Cell N='ShdwForegnd' V='#000000' F='Inh'/><Cell N='ShapeShdwShow' V='2'/><Section N='Control'><Row N='TextPosition'><Cell N='X' V='0.2027557343887982'/><Cell N='Y' V='0.02362217539147704'/><Cell N='XDyn' V='0.2027557343887979' F='Inh'/><Cell N='YDyn' V='0.02362217539147721' F='Inh'/></Row></Section><Section N='Geometry' IX='0'><Row T='MoveTo' IX='1'><Cell N='Y' V='0.02362217539147693'/></Row><Row T='LineTo' IX='2'><Cell N='X' V='0.255905425859762'/><Cell N='Y' V='0.02362217539147693'/></Row><Row T='LineTo' IX='3'><Cell N='X' V='0.255905425859762'/><Cell N='Y' V='0.1732282183093101'/></Row></Section></Shape><Shape ID='236' NameU='Dynamic connector.136' Name='动态连接线.66' IsCustomName='1' Type='Shape' Master='5'><Cell N='PinX' V='3.373494373567739' F='Inh'/><Cell N='PinY' V='3.786417263033123' U='MM' F='Inh'/><Cell N='Width' V='0.4101049641672923' F='GUARD(EndX-BeginX)'/><Cell N='Height' V='0.1968503937007874' F='GUARD(0.19685039370079DL)'/><Cell N='LocPinX' V='0.2050524820836461' F='Inh'/><Cell N='LocPinY' V='0.09842519685039369' F='Inh'/><Cell N='BeginX' V='3.168441891484093'/><Cell N='BeginY' V='3.707677243091995'/><Cell N='EndX' V='3.578546855651386' F='PAR(PNT(Sheet.226!Connections.X1,Sheet.226!Connections.Y1))'/><Cell N='EndY' V='3.865157282974251' U='MM' F='PAR(PNT(Sheet.226!Connections.X1,Sheet.226!Connections.Y1))'/><Cell N='LayerMember' V='0'/><Cell N='BegTrigger' V='1' F='_XFTRIGGER(EventXFMod)'/><Cell N='EndTrigger' V='2' F='_XFTRIGGER(Sheet.226!EventXFMod)'/><Cell N='ConFixedCode' V='3'/><Cell N='TxtPinX' V='0.2837925020247741' F='Inh'/><Cell N='TxtPinY' V='0.01968517690926586' F='Inh'/><Cell N='EndArrow' V='0'/><Cell N='FillForegnd' V='#000000' F='Inh'/><Cell N='FillBkgnd' V='#ffffff' F='Inh'/><Cell N='ShdwForegnd' V='#000000' F='Inh'/><Cell N='ShapeShdwShow' V='2'/><Section N='Control'><Row N='TextPosition'><Cell N='X' V='0.283792502024774'/><Cell N='Y' V='0.01968517690926603'/><Cell N='XDyn' V='0.2837925020247741' F='Inh'/><Cell N='YDyn' V='0.01968517690926586' F='Inh'/></Row></Section><Section N='Geometry' IX='0'><Row T='MoveTo' IX='1'><Cell N='Y' V='0.01968517690926586'/></Row><Row T='LineTo' IX='2'><Cell N='X' V='0.410104964167294'/><Cell N='Y' V='0.01968517690926586'/></Row><Row T='LineTo' IX='3'><Cell N='X' V='0.410104964167294'/><Cell N='Y' V='0.1771652167915216'/></Row></Section></Shape><Shape ID='237' NameU='Dynamic connector.137' Name='动态连接线.67' IsCustomName='1' Type='Shape' Master='5'><Cell N='PinX' V='3.758008809263279' F='Inh'/><Cell N='PinY' V='3.786417164880763' U='MM' F='Inh'/><Cell N='Width' V='0.3589239072237866' F='GUARD(EndX-BeginX)'/><Cell N='Height' V='0.1968503937007874' F='GUARD(0.19685039370079DL)'/><Cell N='LocPinX' V='0.1794619536118933' F='Inh'/><Cell N='LocPinY' V='0.09842519685039369' F='Inh'/><Cell N='BeginX' V='3.578546855651386'/><Cell N='BeginY' V='3.707677046787274'/><Cell N='EndX' V='3.937470762875172' F='PAR(PNT(Sheet.227!Connections.X1,Sheet.227!Connections.Y1))'/><Cell N='EndY' V='3.865157282974251' U='MM' F='PAR(PNT(Sheet.227!Connections.X1,Sheet.227!Connections.Y1))'/><Cell N='LayerMember' V='0'/><Cell N='BegTrigger' V='1' F='_XFTRIGGER(EventXFMod)'/><Cell N='EndTrigger' V='2' F='_XFTRIGGER(Sheet.227!EventXFMod)'/><Cell N='ConFixedCode' V='3'/><Cell N='TxtPinX' V='0.2582020717053806' F='Inh'/><Cell N='TxtPinY' V='0.01968507875690495' F='Inh'/><Cell N='EndArrow' V='0'/><Cell N='FillForegnd' V='#000000' F='Inh'/><Cell N='FillBkgnd' V='#ffffff' F='Inh'/><Cell N='ShdwForegnd' V='#000000' F='Inh'/><Cell N='ShapeShdwShow' V='2'/><Section N='Control'><Row N='TextPosition'><Cell N='X' V='0.2582020717053805'/><Cell N='Y' V='0.01968507875690511'/><Cell N='XDyn' V='0.2582020717053806' F='Inh'/><Cell N='YDyn' V='0.01968507875690495' F='Inh'/></Row></Section><Section N='Geometry' IX='0'><Row T='MoveTo' IX='1'><Cell N='Y' V='0.01968507875690539'/></Row><Row T='LineTo' IX='2'><Cell N='X' V='0.3589239072237822'/><Cell N='Y' V='0.01968507875690539'/></Row><Row T='LineTo' IX='3'><Cell N='X' V='0.3589239072237822'/><Cell N='Y' V='0.1771653149438821'/></Row></Section></Shape><Shape ID='238' NameU='Dynamic connector.138' Name='动态连接线.68' IsCustomName='1' Type='Shape' Master='5'><Cell N='PinX' V='4.187147020641673' F='Inh'/><Cell N='PinY' V='3.786417164880763' U='MM' F='Inh'/><Cell N='Width' V='0.5019597832697782' F='GUARD(EndX-BeginX)'/><Cell N='Height' V='0.1968503937007874' F='GUARD(0.19685039370079DL)'/><Cell N='LocPinX' V='0.2509798916348891' F='Inh'/><Cell N='LocPinY' V='0.09842519685039369' F='Inh'/><Cell N='BeginX' V='3.936167129006783'/><Cell N='BeginY' V='3.707677046787274'/><Cell N='EndX' V='4.438126912276561' F='PAR(PNT(Sheet.228!Connections.X1,Sheet.228!Connections.Y1))'/><Cell N='EndY' V='3.865157282974251' U='MM' F='PAR(PNT(Sheet.228!Connections.X1,Sheet.228!Connections.Y1))'/><Cell N='LayerMember' V='0'/><Cell N='BegTrigger' V='1' F='_XFTRIGGER(EventXFMod)'/><Cell N='EndTrigger' V='2' F='_XFTRIGGER(Sheet.228!EventXFMod)'/><Cell N='ConFixedCode' V='3'/><Cell N='TxtPinX' V='0.3297200097283777' F='Inh'/><Cell N='TxtPinY' V='0.01968507875690495' F='Inh'/><Cell N='EndArrow' V='0'/><Cell N='FillForegnd' V='#000000' F='Inh'/><Cell N='FillBkgnd' V='#ffffff' F='Inh'/><Cell N='ShdwForegnd' V='#000000' F='Inh'/><Cell N='ShapeShdwShow' V='2'/><Section N='Control'><Row N='TextPosition'><Cell N='X' V='0.329720009728377'/><Cell N='Y' V='0.01968507875690511'/><Cell N='XDyn' V='0.3297200097283777' F='Inh'/><Cell N='YDyn' V='0.01968507875690495' F='Inh'/></Row></Section><Section N='Geometry' IX='0'><Row T='MoveTo' IX='1'><Cell N='Y' V='0.01968507875690539'/></Row><Row T='LineTo' IX='2'><Cell N='X' V='0.5019597832697755'/><Cell N='Y' V='0.01968507875690539'/></Row><Row T='LineTo' IX='3'><Cell N='X' V='0.5019597832697755'/><Cell N='Y' V='0.1771653149438821'/></Row></Section></Shape><Shape ID='239' NameU='Dynamic connector.139' Name='动态连接线.69' IsCustomName='1' Type='Shape' Master='5'><Cell N='PinX' V='4.861355235485639' F='Inh'/><Cell N='PinY' V='4.920275471984125' F='Inh'/><Cell N='Width' V='0.1968503937007874' F='GUARD(0.19685039370079DL)'/><Cell N='Height' V='0.1968503937007874' F='GUARD(0.19685039370079DL)'/><Cell N='LocPinX' V='0.09842519685039369' F='Inh'/><Cell N='LocPinY' V='0.09842519685039369' F='Inh'/><Cell N='BeginX' V='4.861355235485639' F='PAR(PNT(Sheet.231!Connections.X3,Sheet.231!Connections.Y3))'/><Cell N='BeginY' V='4.888779408991999' F='PAR(PNT(Sheet.231!Connections.X3,Sheet.231!Connections.Y3))'/><Cell N='EndX' V='4.861355235485639'/><Cell N='EndY' V='4.95177153497625'/><Cell N='LayerMember' V='0'/><Cell N='BegTrigger' V='2' F='_XFTRIGGER(Sheet.231!EventXFMod)'/><Cell N='EndTrigger' V='1' F='_XFTRIGGER(EventXFMod)'/><Cell N='TxtPinX' V='0.09842519462108611' F='Inh'/><Cell N='TxtPinY' V='0.09842519462108611' F='Inh'/><Cell N='EndArrow' V='0'/><Cell N='FillForegnd' V='#000000' F='Inh'/><Cell N='FillBkgnd' V='#ffffff' F='Inh'/><Cell N='ShdwForegnd' V='#000000' F='Inh'/><Cell N='ShapeShdwShow' V='2'/><Section N='Control'><Row N='TextPosition'><Cell N='X' V='0.09842519462108611'/><Cell N='Y' V='0.09842519462108611'/><Cell N='XDyn' V='0.09842519462108611' F='Inh'/><Cell N='YDyn' V='0.09842519462108611' F='Inh'/></Row></Section><Section N='Geometry' IX='0'><Row T='MoveTo' IX='1'><Cell N='X' V='0.09842519685039353'/><Cell N='Y' V='0.06692913385826849'/></Row><Row T='LineTo' IX='2'><Cell N='X' V='0.09842519685039353'/><Cell N='Y' V='0.1299212598425195'/></Row><Row T='LineTo' IX='3' Del='1'/></Section></Shape><Shape ID='240' NameU='Dynamic connector.140' Name='动态连接线.70' IsCustomName='1' Type='Shape' Master='5'><Cell N='PinX' V='5.09837443210772' F='Inh'/><Cell N='PinY' V='4.473590071697598' F='Inh'/><Cell N='Width' V='0.1968503937007874' F='GUARD(0.19685039370079DL)'/><Cell N='Height' V='1.531826049820646' F='GUARD(EndY-BeginY)'/><Cell N='LocPinX' V='0.09842519685039369' F='Inh'/><Cell N='LocPinY' V='0.7659130249103232' F='Inh'/><Cell N='BeginX' V='5.097575845882377'/><Cell N='BeginY' V='3.707677046787274'/><Cell N='EndX' V='5.099173018333063' F='_WALKGLUE(EndTrigger,BegTrigger,WalkPreference)'/><Cell N='EndY' V='5.239503096607921' F='_WALKGLUE(EndTrigger,BegTrigger,WalkPreference)'/><Cell N='LayerMember' V='0'/><Cell N='BegTrigger' V='1' F='_XFTRIGGER(EventXFMod)'/><Cell N='EndTrigger' V='2' F='_XFTRIGGER(Sheet.249!EventXFMod)'/><Cell N='TxtPinX' V='0.09842519834637642' F='Inh'/><Cell N='TxtPinY' V='0.7659130096435547' F='Inh'/><Cell N='ConFixedCode' V='3'/><Cell N='FillForegnd' V='#000000' F='Inh'/><Cell N='FillBkgnd' V='#ffffff' F='Inh'/><Cell N='ShdwForegnd' V='#000000' F='Inh'/><Cell N='ShapeShdwShow' V='2'/><Section N='Control'><Row N='TextPosition'><Cell N='X' V='0.09842519834637642'/><Cell N='Y' V='0.7659130096435547'/><Cell N='XDyn' V='0.09842519834637642' F='Inh'/><Cell N='YDyn' V='0.7659130096435547' F='Inh'/></Row></Section><Section N='Geometry' IX='0'><Row T='MoveTo' IX='1'><Cell N='X' V='0.09762661062505096'/></Row><Row T='LineTo' IX='2'><Cell N='X' V='0.09922378307573609'/><Cell N='Y' V='1.531826049820646'/></Row><Row T='LineTo' IX='3' Del='1'/></Section></Shape><Shape ID='241' NameU='Circle.141' Name='圆形.74' IsCustomName='1' Type='Shape' Master='9'><Cell N='PinX' V='3.188455013537929'/><Cell N='PinY' V='3.479986804488786'/><Cell N='Width' V='0.2532807470641663'/><Cell N='Height' V='0.2532807470641663'/><Cell N='LocPinX' V='0.1266403735320831' F='Inh'/><Cell N='LocPinY' V='0.1266403735320831' F='Inh'/><Cell N='TxtPinX' V='0.1266403735320831' F='Inh'/><Cell N='TxtPinY' V='0.1266403735320831' F='Inh'/><Cell N='TxtWidth' V='0.2216206536811455' F='Inh'/><Cell N='TxtHeight' V='0.1899605602981247' F='Inh'/><Cell N='TxtLocPinX' V='0.1108103268405727' F='Inh'/><Cell N='TxtLocPinY' V='0.09498028014906235' F='Inh'/><Cell N='ObjType' V='1'/><Cell N='ShapeShdwShow' V='2'/><Section N='Connection'><Row T='Connection' IX='0'><Cell N='X' V='0.1266403735320831' F='Inh'/><Cell N='Y' V='0.2532807470641663' F='Inh'/></Row><Row T='Connection' IX='1'><Cell N='X' V='0.1266403735320831' F='Inh'/><Cell N='Y' V='0.1266403735320831' F='Inh'/></Row><Row T='Connection' IX='2'><Cell N='Y' V='0.1266403735320831' F='Inh'/></Row><Row T='Connection' IX='3'><Cell N='X' V='0.1266403735320831' F='Inh'/></Row><Row T='Connection' IX='4'><Cell N='X' V='0.2532807470641663' F='Inh'/><Cell N='Y' V='0.1266403735320831' F='Inh'/></Row><Row T='Connection' IX='5'><Cell N='X' V='0.03708030137019394' F='Inh'/><Cell N='Y' V='0.03708030137019394' F='Inh'/></Row><Row T='Connection' IX='6'><Cell N='X' V='0.2162004456939723' F='Inh'/><Cell N='Y' V='0.03708030137019394' F='Inh'/></Row><Row T='Connection' IX='7'><Cell N='X' V='0.2162004456939723' F='Inh'/><Cell N='Y' V='0.2162004456939723' F='Inh'/></Row><Row T='Connection' IX='8'><Cell N='X' V='0.03708030137019394' F='Inh'/><Cell N='Y' V='0.2162004456939723' F='Inh'/></Row></Section><Section N='Geometry' IX='0'><Row T='MoveTo' IX='1'><Cell N='Y' V='0.1266403735320831' F='Inh'/></Row><Row T='EllipticalArcTo' IX='2'><Cell N='X' V='0.2532807470641663' F='Inh'/><Cell N='Y' V='0.1266403735320831' F='Inh'/><Cell N='A' V='0.1266403735320831' U='DL' F='Inh'/><Cell N='B' V='0.2532807470641663' U='DL' F='Inh'/></Row><Row T='EllipticalArcTo' IX='3'><Cell N='Y' V='0.1266403735320831' F='Inh'/><Cell N='A' V='0.1266403735320831' U='DL' F='Inh'/></Row></Section></Shape><Shape ID='242' Type='Foreign' LineStyle='2' FillStyle='2' TextStyle='2'><Cell N='PinX' V='3.185536723698917'/><Cell N='PinY' V='3.983267518107531'/><Cell N='Width' V='0.1665354330708662'/><Cell N='Height' V='0.152755905511811'/><Cell N='LocPinX' V='0.08326771653543308' F='Width*0.5'/><Cell N='LocPinY' V='0.0763779527559055' F='Height*0.5'/><Cell N='Angle' V='0'/><Cell N='FlipX' V='0'/><Cell N='FlipY' V='0'/><Cell N='ResizeMode' V='0'/><Cell N='ImgOffsetX' V='0' F='ImgWidth*0'/><Cell N='ImgOffsetY' V='0' F='ImgHeight*0'/><Cell N='ImgWidth' V='0.1665354330708662' F='Width*1'/><Cell N='ImgHeight' V='0.152755905511811' F='Height*1'/><Cell N='ClippingPath' V='' F='No Formula' E='#N/A'/><Cell N='TxtPinX' V='0.08326771653543308' F='Width*0.5'/><Cell N='TxtPinY' V='0' F='Height*0'/><Cell N='TxtWidth' V='0.1665354330708662' F='Width*1'/><Cell N='TxtHeight' V='0' F='Height*0'/><Cell N='TxtLocPinX' V='0.08326771653543308' F='TxtWidth*0.5'/><Cell N='TxtLocPinY' V='0' F='TxtHeight*0.5'/><Cell N='TxtAngle' V='0'/><Cell N='VerticalAlign' V='0'/><Cell N='ShapeShdwShow' V='2'/><Section N='Geometry' IX='0'><Cell N='NoFill' V='0'/><Cell N='NoLine' V='0'/><Cell N='NoShow' V='0'/><Cell N='NoSnap' V='0'/><Cell N='NoQuickDrag' V='0'/><Row T='RelMoveTo' IX='1'><Cell N='X' V='0'/><Cell N='Y' V='0'/></Row><Row T='RelLineTo' IX='2'><Cell N='X' V='1'/><Cell N='Y' V='0'/></Row><Row T='RelLineTo' IX='3'><Cell N='X' V='1'/><Cell N='Y' V='1'/></Row><Row T='RelLineTo' IX='4'><Cell N='X' V='0'/><Cell N='Y' V='1'/></Row><Row T='RelLineTo' IX='5'><Cell N='X' V='0'/><Cell N='Y' V='0'/></Row></Section><ForeignData ForeignType='Object' ObjectType='33280' ShowAsIcon='0' ObjectWidth='0.16653543307087' ObjectHeight='0.15275590551181'><Rel r:id='rId19'/></ForeignData></Shape><Shape ID='243' Type='Foreign' LineStyle='2' FillStyle='2' TextStyle='2'><Cell N='PinX' V='3.578546855651386'/><Cell N='PinY' V='3.983267518107531'/><Cell N='Width' V='0.1665354330708662'/><Cell N='Height' V='0.152755905511811'/><Cell N='LocPinX' V='0.08326771653543308' F='Width*0.5'/><Cell N='LocPinY' V='0.0763779527559055' F='Height*0.5'/><Cell N='Angle' V='0'/><Cell N='FlipX' V='0'/><Cell N='FlipY' V='0'/><Cell N='ResizeMode' V='0'/><Cell N='ImgOffsetX' V='0' F='ImgWidth*0'/><Cell N='ImgOffsetY' V='0' F='ImgHeight*0'/><Cell N='ImgWidth' V='0.1665354330708662' F='Width*1'/><Cell N='ImgHeight' V='0.152755905511811' F='Height*1'/><Cell N='ClippingPath' V='' F='No Formula' E='#N/A'/><Cell N='TxtPinX' V='0.08326771653543308' F='Width*0.5'/><Cell N='TxtPinY' V='0' F='Height*0'/><Cell N='TxtWidth' V='0.1665354330708662' F='Width*1'/><Cell N='TxtHeight' V='0' F='Height*0'/><Cell N='TxtLocPinX' V='0.08326771653543308' F='TxtWidth*0.5'/><Cell N='TxtLocPinY' V='0' F='TxtHeight*0.5'/><Cell N='TxtAngle' V='0'/><Cell N='VerticalAlign' V='0'/><Cell N='ShapeShdwShow' V='2'/><Section N='Geometry' IX='0'><Cell N='NoFill' V='0'/><Cell N='NoLine' V='0'/><Cell N='NoShow' V='0'/><Cell N='NoSnap' V='0'/><Cell N='NoQuickDrag' V='0'/><Row T='RelMoveTo' IX='1'><Cell N='X' V='0'/><Cell N='Y' V='0'/></Row><Row T='RelLineTo' IX='2'><Cell N='X' V='1'/><Cell N='Y' V='0'/></Row><Row T='RelLineTo' IX='3'><Cell N='X' V='1'/><Cell N='Y' V='1'/></Row><Row T='RelLineTo' IX='4'><Cell N='X' V='0'/><Cell N='Y' V='1'/></Row><Row T='RelLineTo' IX='5'><Cell N='X' V='0'/><Cell N='Y' V='0'/></Row></Section><ForeignData ForeignType='Object' ObjectType='33280' ShowAsIcon='0' ObjectWidth='0.16653543307087' ObjectHeight='0.15275590551181'><Rel r:id='rId20'/></ForeignData></Shape><Shape ID='244' Type='Foreign' LineStyle='2' FillStyle='2' TextStyle='2'><Cell N='PinX' V='4.438126912276561'/><Cell N='PinY' V='3.983267518107531'/><Cell N='Width' V='0.1665354330708662'/><Cell N='Height' V='0.152755905511811'/><Cell N='LocPinX' V='0.08326771653543308' F='Width*0.5'/><Cell N='LocPinY' V='0.0763779527559055' F='Height*0.5'/><Cell N='Angle' V='0'/><Cell N='FlipX' V='0'/><Cell N='FlipY' V='0'/><Cell N='ResizeMode' V='0'/><Cell N='ImgOffsetX' V='0' F='ImgWidth*0'/><Cell N='ImgOffsetY' V='0' F='ImgHeight*0'/><Cell N='ImgWidth' V='0.1665354330708662' F='Width*1'/><Cell N='ImgHeight' V='0.152755905511811' F='Height*1'/><Cell N='ClippingPath' V='' F='No Formula' E='#N/A'/><Cell N='TxtPinX' V='0.08326771653543308' F='Width*0.5'/><Cell N='TxtPinY' V='0' F='Height*0'/><Cell N='TxtWidth' V='0.1665354330708662' F='Width*1'/><Cell N='TxtHeight' V='0' F='Height*0'/><Cell N='TxtLocPinX' V='0.08326771653543308' F='TxtWidth*0.5'/><Cell N='TxtLocPinY' V='0' F='TxtHeight*0.5'/><Cell N='TxtAngle' V='0'/><Cell N='VerticalAlign' V='0'/><Cell N='ShapeShdwShow' V='2'/><Section N='Geometry' IX='0'><Cell N='NoFill' V='0'/><Cell N='NoLine' V='0'/><Cell N='NoShow' V='0'/><Cell N='NoSnap' V='0'/><Cell N='NoQuickDrag' V='0'/><Row T='RelMoveTo' IX='1'><Cell N='X' V='0'/><Cell N='Y' V='0'/></Row><Row T='RelLineTo' IX='2'><Cell N='X' V='1'/><Cell N='Y' V='0'/></Row><Row T='RelLineTo' IX='3'><Cell N='X' V='1'/><Cell N='Y' V='1'/></Row><Row T='RelLineTo' IX='4'><Cell N='X' V='0'/><Cell N='Y' V='1'/></Row><Row T='RelLineTo' IX='5'><Cell N='X' V='0'/><Cell N='Y' V='0'/></Row></Section><ForeignData ForeignType='Object' ObjectType='33280' ShowAsIcon='0' ObjectWidth='0.16653543307087' ObjectHeight='0.15275590551181'><Rel r:id='rId21'/></ForeignData></Shape><Shape ID='245' Type='Foreign' LineStyle='2' FillStyle='2' TextStyle='2'><Cell N='PinX' V='3.937470762875172'/><Cell N='PinY' V='3.983267518107533'/><Cell N='Width' V='0.3468503937007874'/><Cell N='Height' V='0.1940944881889764'/><Cell N='LocPinX' V='0.1734251968503937' F='Width*0.5'/><Cell N='LocPinY' V='0.09704724409448819' F='Height*0.5'/><Cell N='Angle' V='0'/><Cell N='FlipX' V='0'/><Cell N='FlipY' V='0'/><Cell N='ResizeMode' V='0'/><Cell N='ImgOffsetX' V='0' F='ImgWidth*0'/><Cell N='ImgOffsetY' V='0' F='ImgHeight*0'/><Cell N='ImgWidth' V='0.3468503937007874' F='Width*1'/><Cell N='ImgHeight' V='0.1940944881889764' F='Height*1'/><Cell N='ClippingPath' V='' F='No Formula' E='#N/A'/><Cell N='TxtPinX' V='0.1734251968503937' F='Width*0.5'/><Cell N='TxtPinY' V='0' F='Height*0'/><Cell N='TxtWidth' V='0.3468503937007874' F='Width*1'/><Cell N='TxtHeight' V='0' F='Height*0'/><Cell N='TxtLocPinX' V='0.1734251968503937' F='TxtWidth*0.5'/><Cell N='TxtLocPinY' V='0' F='TxtHeight*0.5'/><Cell N='TxtAngle' V='0'/><Cell N='VerticalAlign' V='0'/><Cell N='ShapeShdwShow' V='2'/><Section N='Geometry' IX='0'><Cell N='NoFill' V='0'/><Cell N='NoLine' V='0'/><Cell N='NoShow' V='0'/><Cell N='NoSnap' V='0'/><Cell N='NoQuickDrag' V='0'/><Row T='RelMoveTo' IX='1'><Cell N='X' V='0'/><Cell N='Y' V='0'/></Row><Row T='RelLineTo' IX='2'><Cell N='X' V='1'/><Cell N='Y' V='0'/></Row><Row T='RelLineTo' IX='3'><Cell N='X' V='1'/><Cell N='Y' V='1'/></Row><Row T='RelLineTo' IX='4'><Cell N='X' V='0'/><Cell N='Y' V='1'/></Row><Row T='RelLineTo' IX='5'><Cell N='X' V='0'/><Cell N='Y' V='0'/></Row></Section><ForeignData ForeignType='Object' ObjectType='33280' ShowAsIcon='0' ObjectWidth='0.34685039370079' ObjectHeight='0.19409448818898'><Rel r:id='rId22'/></ForeignData></Shape><Shape ID='246' Type='Foreign' LineStyle='2' FillStyle='2' TextStyle='2'><Cell N='PinX' V='4.861355235485639'/><Cell N='PinY' V='4.77066917385872'/><Cell N='Width' V='0.3468503937007874'/><Cell N='Height' V='0.1940944881889764'/><Cell N='LocPinX' V='0.1734251968503937' F='Width*0.5'/><Cell N='LocPinY' V='0.09704724409448819' F='Height*0.5'/><Cell N='Angle' V='0'/><Cell N='FlipX' V='0'/><Cell N='FlipY' V='0'/><Cell N='ResizeMode' V='0'/><Cell N='ImgOffsetX' V='0' F='ImgWidth*0'/><Cell N='ImgOffsetY' V='0' F='ImgHeight*0'/><Cell N='ImgWidth' V='0.3468503937007874' F='Width*1'/><Cell N='ImgHeight' V='0.1940944881889764' F='Height*1'/><Cell N='ClippingPath' V='' F='No Formula' E='#N/A'/><Cell N='TxtPinX' V='0.1734251968503937' F='Width*0.5'/><Cell N='TxtPinY' V='0' F='Height*0'/><Cell N='TxtWidth' V='0.3468503937007874' F='Width*1'/><Cell N='TxtHeight' V='0' F='Height*0'/><Cell N='TxtLocPinX' V='0.1734251968503937' F='TxtWidth*0.5'/><Cell N='TxtLocPinY' V='0' F='TxtHeight*0.5'/><Cell N='TxtAngle' V='0'/><Cell N='VerticalAlign' V='0'/><Cell N='ShapeShdwShow' V='2'/><Section N='Geometry' IX='0'><Cell N='NoFill' V='0'/><Cell N='NoLine' V='0'/><Cell N='NoShow' V='0'/><Cell N='NoSnap' V='0'/><Cell N='NoQuickDrag' V='0'/><Row T='RelMoveTo' IX='1'><Cell N='X' V='0'/><Cell N='Y' V='0'/></Row><Row T='RelLineTo' IX='2'><Cell N='X' V='1'/><Cell N='Y' V='0'/></Row><Row T='RelLineTo' IX='3'><Cell N='X' V='1'/><Cell N='Y' V='1'/></Row><Row T='RelLineTo' IX='4'><Cell N='X' V='0'/><Cell N='Y' V='1'/></Row><Row T='RelLineTo' IX='5'><Cell N='X' V='0'/><Cell N='Y' V='0'/></Row></Section><ForeignData ForeignType='Object' ObjectType='33280' ShowAsIcon='0' ObjectWidth='0.34685039370079' ObjectHeight='0.19409448818898'><Rel r:id='rId23'/></ForeignData></Shape><Shape ID='247' Type='Foreign' LineStyle='2' FillStyle='2' TextStyle='2'><Cell N='PinX' V='3.194032504282721'/><Cell N='PinY' V='3.471456793430863'/><Cell N='Width' V='0.1665354330708662'/><Cell N='Height' V='0.25'/><Cell N='LocPinX' V='0.08326771653543308' F='Width*0.5'/><Cell N='LocPinY' V='0.125' F='Height*0.5'/><Cell N='Angle' V='0'/><Cell N='FlipX' V='0'/><Cell N='FlipY' V='0'/><Cell N='ResizeMode' V='0'/><Cell N='ImgOffsetX' V='0' F='ImgWidth*0'/><Cell N='ImgOffsetY' V='0' F='ImgHeight*0'/><Cell N='ImgWidth' V='0.1665354330708662' F='Width*1'/><Cell N='ImgHeight' V='0.25' F='Height*1'/><Cell N='ClippingPath' V='' F='No Formula' E='#N/A'/><Cell N='TxtPinX' V='0.08326771653543308' F='Width*0.5'/><Cell N='TxtPinY' V='0' F='Height*0'/><Cell N='TxtWidth' V='0.1665354330708662' F='Width*1'/><Cell N='TxtHeight' V='0' F='Height*0'/><Cell N='TxtLocPinX' V='0.08326771653543308' F='TxtWidth*0.5'/><Cell N='TxtLocPinY' V='0' F='TxtHeight*0.5'/><Cell N='TxtAngle' V='0'/><Cell N='VerticalAlign' V='0'/><Cell N='ShapeShdwShow' V='2'/><Section N='Geometry' IX='0'><Cell N='NoFill' V='0'/><Cell N='NoLine' V='0'/><Cell N='NoShow' V='0'/><Cell N='NoSnap' V='0'/><Cell N='NoQuickDrag' V='0'/><Row T='RelMoveTo' IX='1'><Cell N='X' V='0'/><Cell N='Y' V='0'/></Row><Row T='RelLineTo' IX='2'><Cell N='X' V='1'/><Cell N='Y' V='0'/></Row><Row T='RelLineTo' IX='3'><Cell N='X' V='1'/><Cell N='Y' V='1'/></Row><Row T='RelLineTo' IX='4'><Cell N='X' V='0'/><Cell N='Y' V='1'/></Row><Row T='RelLineTo' IX='5'><Cell N='X' V='0'/><Cell N='Y' V='0'/></Row></Section><ForeignData ForeignType='Object' ObjectType='33280' ShowAsIcon='0' ObjectWidth='0.16653543307087' ObjectHeight='0.25'><Rel r:id='rId25'/></ForeignData></Shape><Shape ID='248' NameU='Circle' Name='圆形' Type='Shape' Master='9'><Cell N='PinX' V='5.097575845882377'/><Cell N='PinY' V='5.313326940634936'/><Cell N='Width' V='0.2532677165354331'/><Cell N='Height' V='0.2532677165354331'/><Cell N='LocPinX' V='0.1266338582677165' F='Inh'/><Cell N='LocPinY' V='0.1266338582677165' F='Inh'/><Cell N='TxtPinX' V='0.1266338582677165' F='Inh'/><Cell N='TxtPinY' V='0.1266338582677165' F='Inh'/><Cell N='TxtWidth' V='0.2216092519685039' F='Inh'/><Cell N='TxtHeight' V='0.1899507874015748' F='Inh'/><Cell N='TxtLocPinX' V='0.110804625984252' F='Inh'/><Cell N='TxtLocPinY' V='0.09497539370078739' F='Inh'/><Cell N='ObjType' V='1'/><Cell N='ShapeShdwShow' V='2'/><Section N='Connection'><Row T='Connection' IX='0'><Cell N='X' V='0.1266338582677165' F='Inh'/><Cell N='Y' V='0.2532677165354331' F='Inh'/></Row><Row T='Connection' IX='1'><Cell N='X' V='0.1266338582677165' F='Inh'/><Cell N='Y' V='0.1266338582677165' F='Inh'/></Row><Row T='Connection' IX='2'><Cell N='Y' V='0.1266338582677165' F='Inh'/></Row><Row T='Connection' IX='3'><Cell N='X' V='0.1266338582677165' F='Inh'/></Row><Row T='Connection' IX='4'><Cell N='X' V='0.2532677165354331' F='Inh'/><Cell N='Y' V='0.1266338582677165' F='Inh'/></Row><Row T='Connection' IX='5'><Cell N='X' V='0.0370783937007874' F='Inh'/><Cell N='Y' V='0.0370783937007874' F='Inh'/></Row><Row T='Connection' IX='6'><Cell N='X' V='0.2161893228346457' F='Inh'/><Cell N='Y' V='0.0370783937007874' F='Inh'/></Row><Row T='Connection' IX='7'><Cell N='X' V='0.2161893228346457' F='Inh'/><Cell N='Y' V='0.2161893228346457' F='Inh'/></Row><Row T='Connection' IX='8'><Cell N='X' V='0.0370783937007874' F='Inh'/><Cell N='Y' V='0.2161893228346457' F='Inh'/></Row></Section><Section N='Geometry' IX='0'><Row T='MoveTo' IX='1'><Cell N='Y' V='0.1266338582677165' F='Inh'/></Row><Row T='EllipticalArcTo' IX='2'><Cell N='X' V='0.2532677165354331' F='Inh'/><Cell N='Y' V='0.1266338582677165' F='Inh'/><Cell N='A' V='0.1266338582677165' U='DL' F='Inh'/><Cell N='B' V='0.2532677165354331' U='DL' F='Inh'/></Row><Row T='EllipticalArcTo' IX='3'><Cell N='Y' V='0.1266338582677165' F='Inh'/><Cell N='A' V='0.1266338582677165' U='DL' F='Inh'/></Row></Section></Shape><Shape ID='249' Type='Foreign' LineStyle='2' FillStyle='2' TextStyle='2'><Cell N='PinX' V='5.099209704150094'/><Cell N='PinY' V='5.306250352286451'/><Cell N='Width' V='0.1665354330708662'/><Cell N='Height' V='0.25'/><Cell N='LocPinX' V='0.08326771653543308' F='Width*0.5'/><Cell N='LocPinY' V='0.125' F='Height*0.5'/><Cell N='Angle' V='0'/><Cell N='FlipX' V='0'/><Cell N='FlipY' V='0'/><Cell N='ResizeMode' V='0'/><Cell N='ImgOffsetX' V='0' F='ImgWidth*0'/><Cell N='ImgOffsetY' V='0' F='ImgHeight*0'/><Cell N='ImgWidth' V='0.1665354330708662' F='Width*1'/><Cell N='ImgHeight' V='0.25' F='Height*1'/><Cell N='ClippingPath' V='' F='No Formula' E='#N/A'/><Cell N='TxtPinX' V='0.08326771653543308' F='Width*0.5'/><Cell N='TxtPinY' V='0' F='Height*0'/><Cell N='TxtWidth' V='0.1665354330708662' F='Width*1'/><Cell N='TxtHeight' V='0' F='Height*0'/><Cell N='TxtLocPinX' V='0.08326771653543308' F='TxtWidth*0.5'/><Cell N='TxtLocPinY' V='0' F='TxtHeight*0.5'/><Cell N='TxtAngle' V='0'/><Cell N='VerticalAlign' V='0'/><Cell N='ObjType' V='1'/><Cell N='ShapeShdwShow' V='2'/><Section N='Geometry' IX='0'><Cell N='NoFill' V='0'/><Cell N='NoLine' V='0'/><Cell N='NoShow' V='0'/><Cell N='NoSnap' V='0'/><Cell N='NoQuickDrag' V='0'/><Row T='RelMoveTo' IX='1'><Cell N='X' V='0'/><Cell N='Y' V='0'/></Row><Row T='RelLineTo' IX='2'><Cell N='X' V='1'/><Cell N='Y' V='0'/></Row><Row T='RelLineTo' IX='3'><Cell N='X' V='1'/><Cell N='Y' V='1'/></Row><Row T='RelLineTo' IX='4'><Cell N='X' V='0'/><Cell N='Y' V='1'/></Row><Row T='RelLineTo' IX='5'><Cell N='X' V='0'/><Cell N='Y' V='0'/></Row></Section><ForeignData ForeignType='Object' ObjectType='33280' ShowAsIcon='0' ObjectWidth='0.16653543307087' ObjectHeight='0.25'><Rel r:id='rId24'/></ForeignData></Shape><Shape ID='250' Type='Foreign' LineStyle='2' FillStyle='2' TextStyle='2'><Cell N='PinX' V='3.484034560394793'/><Cell N='PinY' V='4.226378042319156'/><Cell N='Width' V='0.1248031496062992'/><Cell N='Height' V='0.25'/><Cell N='LocPinX' V='0.0624015748031496' F='Width*0.5'/><Cell N='LocPinY' V='0.125' F='Height*0.5'/><Cell N='Angle' V='0'/><Cell N='FlipX' V='0'/><Cell N='FlipY' V='0'/><Cell N='ResizeMode' V='0'/><Cell N='ImgOffsetX' V='0' F='ImgWidth*0'/><Cell N='ImgOffsetY' V='0' F='ImgHeight*0'/><Cell N='ImgWidth' V='0.1248031496062992' F='Width*1'/><Cell N='ImgHeight' V='0.25' F='Height*1'/><Cell N='ClippingPath' V='' F='No Formula' E='#N/A'/><Cell N='TxtPinX' V='0.0624015748031496' F='Width*0.5'/><Cell N='TxtPinY' V='0' F='Height*0'/><Cell N='TxtWidth' V='0.1248031496062992' F='Width*1'/><Cell N='TxtHeight' V='0' F='Height*0'/><Cell N='TxtLocPinX' V='0.0624015748031496' F='TxtWidth*0.5'/><Cell N='TxtLocPinY' V='0' F='TxtHeight*0.5'/><Cell N='TxtAngle' V='0'/><Cell N='VerticalAlign' V='0'/><Cell N='ShapeShdwShow' V='2'/><Section N='Geometry' IX='0'><Cell N='NoFill' V='0'/><Cell N='NoLine' V='0'/><Cell N='NoShow' V='0'/><Cell N='NoSnap' V='0'/><Cell N='NoQuickDrag' V='0'/><Row T='RelMoveTo' IX='1'><Cell N='X' V='0'/><Cell N='Y' V='0'/></Row><Row T='RelLineTo' IX='2'><Cell N='X' V='1'/><Cell N='Y' V='0'/></Row><Row T='RelLineTo' IX='3'><Cell N='X' V='1'/><Cell N='Y' V='1'/></Row><Row T='RelLineTo' IX='4'><Cell N='X' V='0'/><Cell N='Y' V='1'/></Row><Row T='RelLineTo' IX='5'><Cell N='X' V='0'/><Cell N='Y' V='0'/></Row></Section><ForeignData ForeignType='Object' ObjectType='33280' ShowAsIcon='0' ObjectWidth='0.1248031496063' ObjectHeight='0.25'><Rel r:id='rId26'/></ForeignData></Shape><Shape ID='251' Type='Foreign' LineStyle='2' FillStyle='2' TextStyle='2'><Cell N='PinX' V='3.118327909941506'/><Cell N='PinY' V='4.226378042319156'/><Cell N='Width' V='0.1665354330708662'/><Cell N='Height' V='0.25'/><Cell N='LocPinX' V='0.08326771653543308' F='Width*0.5'/><Cell N='LocPinY' V='0.125' F='Height*0.5'/><Cell N='Angle' V='0'/><Cell N='FlipX' V='0'/><Cell N='FlipY' V='0'/><Cell N='ResizeMode' V='0'/><Cell N='ImgOffsetX' V='0' F='ImgWidth*0'/><Cell N='ImgOffsetY' V='0' F='ImgHeight*0'/><Cell N='ImgWidth' V='0.1665354330708662' F='Width*1'/><Cell N='ImgHeight' V='0.25' F='Height*1'/><Cell N='ClippingPath' V='' F='No Formula' E='#N/A'/><Cell N='TxtPinX' V='0.08326771653543308' F='Width*0.5'/><Cell N='TxtPinY' V='0' F='Height*0'/><Cell N='TxtWidth' V='0.1665354330708662' F='Width*1'/><Cell N='TxtHeight' V='0' F='Height*0'/><Cell N='TxtLocPinX' V='0.08326771653543308' F='TxtWidth*0.5'/><Cell N='TxtLocPinY' V='0' F='TxtHeight*0.5'/><Cell N='TxtAngle' V='0'/><Cell N='VerticalAlign' V='0'/><Cell N='ShapeShdwShow' V='2'/><Section N='Geometry' IX='0'><Cell N='NoFill' V='0'/><Cell N='NoLine' V='0'/><Cell N='NoShow' V='0'/><Cell N='NoSnap' V='0'/><Cell N='NoQuickDrag' V='0'/><Row T='RelMoveTo' IX='1'><Cell N='X' V='0'/><Cell N='Y' V='0'/></Row><Row T='RelLineTo' IX='2'><Cell N='X' V='1'/><Cell N='Y' V='0'/></Row><Row T='RelLineTo' IX='3'><Cell N='X' V='1'/><Cell N='Y' V='1'/></Row><Row T='RelLineTo' IX='4'><Cell N='X' V='0'/><Cell N='Y' V='1'/></Row><Row T='RelLineTo' IX='5'><Cell N='X' V='0'/><Cell N='Y' V='0'/></Row></Section><ForeignData ForeignType='Object' ObjectType='33280' ShowAsIcon='0' ObjectWidth='0.16653543307087' ObjectHeight='0.25'><Rel r:id='rId27'/></ForeignData></Shape><Shape ID='252' Type='Foreign' LineStyle='2' FillStyle='2' TextStyle='2'><Cell N='PinX' V='4.100373135289964'/><Cell N='PinY' V='4.232283595893169'/><Cell N='Width' V='0.1248031496062992'/><Cell N='Height' V='0.25'/><Cell N='LocPinX' V='0.0624015748031496' F='Width*0.5'/><Cell N='LocPinY' V='0.125' F='Height*0.5'/><Cell N='Angle' V='0'/><Cell N='FlipX' V='0'/><Cell N='FlipY' V='0'/><Cell N='ResizeMode' V='0'/><Cell N='ImgOffsetX' V='0' F='ImgWidth*0'/><Cell N='ImgOffsetY' V='0' F='ImgHeight*0'/><Cell N='ImgWidth' V='0.1248031496062992' F='Width*1'/><Cell N='ImgHeight' V='0.25' F='Height*1'/><Cell N='ClippingPath' V='' F='No Formula' E='#N/A'/><Cell N='TxtPinX' V='0.0624015748031496' F='Width*0.5'/><Cell N='TxtPinY' V='0' F='Height*0'/><Cell N='TxtWidth' V='0.1248031496062992' F='Width*1'/><Cell N='TxtHeight' V='0' F='Height*0'/><Cell N='TxtLocPinX' V='0.0624015748031496' F='TxtWidth*0.5'/><Cell N='TxtLocPinY' V='0' F='TxtHeight*0.5'/><Cell N='TxtAngle' V='0'/><Cell N='VerticalAlign' V='0'/><Cell N='ShapeShdwShow' V='2'/><Section N='Geometry' IX='0'><Cell N='NoFill' V='0'/><Cell N='NoLine' V='0'/><Cell N='NoShow' V='0'/><Cell N='NoSnap' V='0'/><Cell N='NoQuickDrag' V='0'/><Row T='RelMoveTo' IX='1'><Cell N='X' V='0'/><Cell N='Y' V='0'/></Row><Row T='RelLineTo' IX='2'><Cell N='X' V='1'/><Cell N='Y' V='0'/></Row><Row T='RelLineTo' IX='3'><Cell N='X' V='1'/><Cell N='Y' V='1'/></Row><Row T='RelLineTo' IX='4'><Cell N='X' V='0'/><Cell N='Y' V='1'/></Row><Row T='RelLineTo' IX='5'><Cell N='X' V='0'/><Cell N='Y' V='0'/></Row></Section><ForeignData ForeignType='Object' ObjectType='33280' ShowAsIcon='0' ObjectWidth='0.1248031496063' ObjectHeight='0.25'><Rel r:id='rId28'/></ForeignData></Shape><Shape ID='253' Type='Foreign' LineStyle='2' FillStyle='2' TextStyle='2'><Cell N='PinX' V='4.579548430307196'/><Cell N='PinY' V='4.232283595893169'/><Cell N='Width' V='0.1665354330708662'/><Cell N='Height' V='0.25'/><Cell N='LocPinX' V='0.08326771653543308' F='Width*0.5'/><Cell N='LocPinY' V='0.125' F='Height*0.5'/><Cell N='Angle' V='0'/><Cell N='FlipX' V='0'/><Cell N='FlipY' V='0'/><Cell N='ResizeMode' V='0'/><Cell N='ImgOffsetX' V='0' F='ImgWidth*0'/><Cell N='ImgOffsetY' V='0' F='ImgHeight*0'/><Cell N='ImgWidth' V='0.1665354330708662' F='Width*1'/><Cell N='ImgHeight' V='0.25' F='Height*1'/><Cell N='ClippingPath' V='' F='No Formula' E='#N/A'/><Cell N='TxtPinX' V='0.08326771653543308' F='Width*0.5'/><Cell N='TxtPinY' V='0' F='Height*0'/><Cell N='TxtWidth' V='0.1665354330708662' F='Width*1'/><Cell N='TxtHeight' V='0' F='Height*0'/><Cell N='TxtLocPinX' V='0.08326771653543308' F='TxtWidth*0.5'/><Cell N='TxtLocPinY' V='0' F='TxtHeight*0.5'/><Cell N='TxtAngle' V='0'/><Cell N='VerticalAlign' V='0'/><Cell N='ShapeShdwShow' V='2'/><Section N='Geometry' IX='0'><Cell N='NoFill' V='0'/><Cell N='NoLine' V='0'/><Cell N='NoShow' V='0'/><Cell N='NoSnap' V='0'/><Cell N='NoQuickDrag' V='0'/><Row T='RelMoveTo' IX='1'><Cell N='X' V='0'/><Cell N='Y' V='0'/></Row><Row T='RelLineTo' IX='2'><Cell N='X' V='1'/><Cell N='Y' V='0'/></Row><Row T='RelLineTo' IX='3'><Cell N='X' V='1'/><Cell N='Y' V='1'/></Row><Row T='RelLineTo' IX='4'><Cell N='X' V='0'/><Cell N='Y' V='1'/></Row><Row T='RelLineTo' IX='5'><Cell N='X' V='0'/><Cell N='Y' V='0'/></Row></Section><ForeignData ForeignType='Object' ObjectType='33280' ShowAsIcon='0' ObjectWidth='0.16653543307087' ObjectHeight='0.25'><Rel r:id='rId29'/></ForeignData></Shape><Shape ID='254' Type='Foreign' LineStyle='2' FillStyle='2' TextStyle='2'><Cell N='PinX' V='2.89943024768594'/><Cell N='PinY' V='5.078740280155204'/><Cell N='Width' V='0.25'/><Cell N='Height' V='0.25'/><Cell N='LocPinX' V='0.125' F='Width*0.5'/><Cell N='LocPinY' V='0.125' F='Height*0.5'/><Cell N='Angle' V='0'/><Cell N='FlipX' V='0'/><Cell N='FlipY' V='0'/><Cell N='ResizeMode' V='0'/><Cell N='ImgOffsetX' V='0' F='ImgWidth*0'/><Cell N='ImgOffsetY' V='0' F='ImgHeight*0'/><Cell N='ImgWidth' V='0.25' F='Width*1'/><Cell N='ImgHeight' V='0.25' F='Height*1'/><Cell N='ClippingPath' V='' F='No Formula' E='#N/A'/><Cell N='TxtPinX' V='0.125' F='Width*0.5'/><Cell N='TxtPinY' V='0' F='Height*0'/><Cell N='TxtWidth' V='0.25' F='Width*1'/><Cell N='TxtHeight' V='0' F='Height*0'/><Cell N='TxtLocPinX' V='0.125' F='TxtWidth*0.5'/><Cell N='TxtLocPinY' V='0' F='TxtHeight*0.5'/><Cell N='TxtAngle' V='0'/><Cell N='VerticalAlign' V='0'/><Cell N='ObjType' V='1'/><Section N='Geometry' IX='0'><Cell N='NoFill' V='0'/><Cell N='NoLine' V='0'/><Cell N='NoShow' V='0'/><Cell N='NoSnap' V='0'/><Cell N='NoQuickDrag' V='0'/><Row T='RelMoveTo' IX='1'><Cell N='X' V='0'/><Cell N='Y' V='0'/></Row><Row T='RelLineTo' IX='2'><Cell N='X' V='1'/><Cell N='Y' V='0'/></Row><Row T='RelLineTo' IX='3'><Cell N='X' V='1'/><Cell N='Y' V='1'/></Row><Row T='RelLineTo' IX='4'><Cell N='X' V='0'/><Cell N='Y' V='1'/></Row><Row T='RelLineTo' IX='5'><Cell N='X' V='0'/><Cell N='Y' V='0'/></Row></Section><ForeignData ForeignType='Object' ObjectType='33280' ShowAsIcon='0' ObjectWidth='0.25' ObjectHeight='0.25'><Rel r:id='rId30'/></ForeignData></Shape><Shape ID='255' Type='Foreign' LineStyle='2' FillStyle='2' TextStyle='2'><Cell N='PinX' V='5.194311951407921'/><Cell N='PinY' V='3.569881695703033'/><Cell N='Width' V='0.1665354330708662'/><Cell N='Height' V='0.25'/><Cell N='LocPinX' V='0.08326771653543308' F='Width*0.5'/><Cell N='LocPinY' V='0.125' F='Height*0.5'/><Cell N='Angle' V='0'/><Cell N='FlipX' V='0'/><Cell N='FlipY' V='0'/><Cell N='ResizeMode' V='0'/><Cell N='ImgOffsetX' V='0' F='ImgWidth*0'/><Cell N='ImgOffsetY' V='0' F='ImgHeight*0'/><Cell N='ImgWidth' V='0.1665354330708662' F='Width*1'/><Cell N='ImgHeight' V='0.25' F='Height*1'/><Cell N='ClippingPath' V='' F='No Formula' E='#N/A'/><Cell N='TxtPinX' V='0.08326771653543308' F='Width*0.5'/><Cell N='TxtPinY' V='0' F='Height*0'/><Cell N='TxtWidth' V='0.1665354330708662' F='Width*1'/><Cell N='TxtHeight' V='0' F='Height*0'/><Cell N='TxtLocPinX' V='0.08326771653543308' F='TxtWidth*0.5'/><Cell N='TxtLocPinY' V='0' F='TxtHeight*0.5'/><Cell N='TxtAngle' V='0'/><Cell N='VerticalAlign' V='0'/><Cell N='ObjType' V='1'/><Section N='Geometry' IX='0'><Cell N='NoFill' V='0'/><Cell N='NoLine' V='0'/><Cell N='NoShow' V='0'/><Cell N='NoSnap' V='0'/><Cell N='NoQuickDrag' V='0'/><Row T='RelMoveTo' IX='1'><Cell N='X' V='0'/><Cell N='Y' V='0'/></Row><Row T='RelLineTo' IX='2'><Cell N='X' V='1'/><Cell N='Y' V='0'/></Row><Row T='RelLineTo' IX='3'><Cell N='X' V='1'/><Cell N='Y' V='1'/></Row><Row T='RelLineTo' IX='4'><Cell N='X' V='0'/><Cell N='Y' V='1'/></Row><Row T='RelLineTo' IX='5'><Cell N='X' V='0'/><Cell N='Y' V='0'/></Row></Section><ForeignData ForeignType='Object' ObjectType='33280' ShowAsIcon='0' ObjectWidth='0.16653543307087' ObjectHeight='0.25'><Rel r:id='rId31'/></ForeignData></Shape><Shape ID='256' Type='Foreign' LineStyle='2' FillStyle='2' TextStyle='2'><Cell N='PinX' V='5.229154723358039'/><Cell N='PinY' V='5.085630040387054'/><Cell N='Width' V='0.152755905511811'/><Cell N='Height' V='0.25'/><Cell N='LocPinX' V='0.0763779527559055' F='Width*0.5'/><Cell N='LocPinY' V='0.125' F='Height*0.5'/><Cell N='Angle' V='0'/><Cell N='FlipX' V='0'/><Cell N='FlipY' V='0'/><Cell N='ResizeMode' V='0'/><Cell N='ImgOffsetX' V='0' F='ImgWidth*0'/><Cell N='ImgOffsetY' V='0' F='ImgHeight*0'/><Cell N='ImgWidth' V='0.152755905511811' F='Width*1'/><Cell N='ImgHeight' V='0.25' F='Height*1'/><Cell N='ClippingPath' V='' F='No Formula' E='#N/A'/><Cell N='TxtPinX' V='0.0763779527559055' F='Width*0.5'/><Cell N='TxtPinY' V='0' F='Height*0'/><Cell N='TxtWidth' V='0.152755905511811' F='Width*1'/><Cell N='TxtHeight' V='0' F='Height*0'/><Cell N='TxtLocPinX' V='0.0763779527559055' F='TxtWidth*0.5'/><Cell N='TxtLocPinY' V='0' F='TxtHeight*0.5'/><Cell N='TxtAngle' V='0'/><Cell N='VerticalAlign' V='0'/><Cell N='ObjType' V='1'/><Section N='Geometry' IX='0'><Cell N='NoFill' V='0'/><Cell N='NoLine' V='0'/><Cell N='NoShow' V='0'/><Cell N='NoSnap' V='0'/><Cell N='NoQuickDrag' V='0'/><Row T='RelMoveTo' IX='1'><Cell N='X' V='0'/><Cell N='Y' V='0'/></Row><Row T='RelLineTo' IX='2'><Cell N='X' V='1'/><Cell N='Y' V='0'/></Row><Row T='RelLineTo' IX='3'><Cell N='X' V='1'/><Cell N='Y' V='1'/></Row><Row T='RelLineTo' IX='4'><Cell N='X' V='0'/><Cell N='Y' V='1'/></Row><Row T='RelLineTo' IX='5'><Cell N='X' V='0'/><Cell N='Y' V='0'/></Row></Section><ForeignData ForeignType='Object' ObjectType='33280' ShowAsIcon='0' ObjectWidth='0.15275590551181' ObjectHeight='0.25'><Rel r:id='rId32'/></ForeignData></Shape><Shape ID='257' NameU='Rectangle.159' Name='矩形.159' Type='Shape' Master='4'><Cell N='PinX' V='6.529548504798345'/><Cell N='PinY' V='4.376716205064689'/><Cell N='Width' V='2.165354389455119'/><Cell N='Height' V='1.416818022173294'/><Cell N='LocPinX' V='1.082677194727559' F='Inh'/><Cell N='LocPinY' V='0.7084090110866472' F='Inh'/><Cell N='FillPattern' V='0'/><Cell N='ShapeShdwShow' V='2'/><Cell N='FillGradientEnabled' V='0'/><Cell N='RotateGradientWithShape' V='0'/><Cell N='UseGroupGradient' V='0'/><Cell N='Rounding' V='0.1574803149606299'/><Section N='Connection'><Row T='Connection' IX='0'><Cell N='X' V='1.082677194727559' F='Inh'/></Row><Row T='Connection' IX='1'><Cell N='X' V='2.165354389455119' F='Inh'/><Cell N='Y' V='0.7084090110866472' F='Inh'/></Row><Row T='Connection' IX='2'><Cell N='X' V='1.082677194727559' F='Inh'/><Cell N='Y' V='1.416818022173294' F='Inh'/></Row><Row T='Connection' IX='3'><Cell N='Y' V='0.7084090110866472' F='Inh'/></Row><Row T='Connection' IX='4'><Cell N='X' V='1.082677194727559' F='Inh'/><Cell N='Y' V='0.7084090110866472' F='Inh'/></Row></Section><Section N='Geometry' IX='0'><Row T='LineTo' IX='2'><Cell N='X' V='2.165354389455119' F='Inh'/></Row><Row T='LineTo' IX='3'><Cell N='X' V='2.165354389455119' F='Inh'/><Cell N='Y' V='1.416818022173294' F='Inh'/></Row><Row T='LineTo' IX='4'><Cell N='Y' V='1.416818022173294' F='Inh'/></Row></Section></Shape><Shape ID='258' NameU='Dynamic connector.160' Name='动态连接线.160' Type='Shape' Master='5'><Cell N='PinX' V='5.433920592014948' U='MM' F='Inh'/><Cell N='PinY' V='4.950165898365486' F='Inh'/><Cell N='Width' V='0.1968503937007874' F='GUARD(0.19685039370079DL)'/><Cell N='Height' V='0.1968503937007874' F='GUARD(0.19685039370079DL)'/><Cell N='LocPinX' V='0.09842519685039369' F='Inh'/><Cell N='LocPinY' V='0.09842519685039369' F='Inh'/><Cell N='BeginX' V='5.361396825935642'/><Cell N='BeginY' V='4.947834738055422'/><Cell N='EndX' V='5.506444358094253' U='MM' F='PAR(PNT(Sheet.261!Connections.X3,Sheet.261!Connections.Y3))'/><Cell N='EndY' V='4.952497058675551' F='PAR(PNT(Sheet.261!Connections.X3,Sheet.261!Connections.Y3))'/><Cell N='LayerMember' V='0'/><Cell N='BegTrigger' V='1' F='_XFTRIGGER(EventXFMod)'/><Cell N='EndTrigger' V='2' F='_XFTRIGGER(Sheet.261!EventXFMod)'/><Cell N='ConFixedCode' V='3'/><Cell N='TxtPinX' V='0.09842519927769901' F='Inh'/><Cell N='TxtPinY' V='0.0984251946210859' F='Inh'/><Cell N='EndArrow' V='0'/><Cell N='FillForegnd' V='#000000' F='Inh'/><Cell N='FillBkgnd' V='#ffffff' F='Inh'/><Cell N='ShdwForegnd' V='#000000' F='Inh'/><Cell N='ShapeShdwShow' V='2'/><Section N='Control'><Row N='TextPosition'><Cell N='X' V='0.09842519927769901'/><Cell N='Y' V='0.0984251946210859'/><Cell N='XDyn' V='0.09842519927769901' F='Inh'/><Cell N='YDyn' V='0.0984251946210859' F='Inh'/></Row></Section><Section N='Geometry' IX='0'><Row T='MoveTo' IX='1'><Cell N='X' V='0.02590143077108742'/><Cell N='Y' V='0.09609403654032889'/></Row><Row T='LineTo' IX='2'><Cell N='X' V='0.1709489629296996'/><Cell N='Y' V='0.1007563571604591'/></Row><Row T='LineTo' IX='3' Del='1'/></Section></Shape><Shape ID='259' NameU='Dynamic connector.161' Name='动态连接线.161' Type='Shape' Master='5'><Cell N='PinX' V='7.507325113936818' F='Inh'/><Cell N='PinY' V='4.026574880955935' U='MM' F='Inh'/><Cell N='Width' V='0.4325530009906302' F='GUARD(EndX-BeginX)'/><Cell N='Height' V='-0.622047281799031' U='MM' F='GUARD(EndY-BeginY)'/><Cell N='LocPinX' V='0.2162765004953151' F='Inh'/><Cell N='LocPinY' V='-0.3110236408995155' U='MM' F='Inh'/><Cell N='BeginX' V='7.291048613441503' F='PAR(PNT(Sheet.271!Connections.X4,Sheet.271!Connections.Y4))'/><Cell N='BeginY' V='4.33759852185545' U='MM' F='PAR(PNT(Sheet.271!Connections.X4,Sheet.271!Connections.Y4))'/><Cell N='EndX' V='7.723601614432133'/><Cell N='EndY' V='3.715551240056419'/><Cell N='LayerMember' V='0'/><Cell N='BegTrigger' V='2' F='_XFTRIGGER(Sheet.271!EventXFMod)'/><Cell N='EndTrigger' V='1' F='_XFTRIGGER(EventXFMod)'/><Cell N='TxtPinY' V='-0.5273001413948307' F='Inh'/><Cell N='ConFixedCode' V='3'/><Cell N='FillForegnd' V='#000000' F='Inh'/><Cell N='FillBkgnd' V='#ffffff' F='Inh'/><Cell N='ShdwForegnd' V='#000000' F='Inh'/><Cell N='ShapeShdwShow' V='2'/><Section N='Control'><Row N='TextPosition'><Cell N='Y' V='-0.5273001413948307'/><Cell N='YDyn' V='-0.5273001413948307' F='Inh'/></Row></Section><Section N='Geometry' IX='0'><Row T='LineTo' IX='2'><Cell N='Y' V='-0.6220472817990306'/></Row><Row T='LineTo' IX='3'><Cell N='X' V='0.4325530009906302'/><Cell N='Y' V='-0.6220472817990306'/></Row></Section></Shape><Shape ID='260' Type='Group' LineStyle='8' FillStyle='8' TextStyle='8'><Cell N='PinX' V='5.614712093207298'/><Cell N='PinY' V='4.952497058675551'/><Cell N='Width' V='0.2165354702260895'/><Cell N='Height' V='0.2165354702260895'/><Cell N='LocPinX' V='0.1082677351130448' F='Width*0.5'/><Cell N='LocPinY' V='0.1082677351130448' F='Height*0.5'/><Cell N='Angle' V='0'/><Cell N='FlipX' V='0'/><Cell N='FlipY' V='0'/><Cell N='ResizeMode' V='0'/><Cell N='QuickStyleVariation' V='2'/><Cell N='ObjType' V='8'/><Cell N='ShapeShdwShow' V='2'/><Shapes><Shape ID='261' NameU='Circle' Name='圆形' Type='Shape' Master='9'><Cell N='PinX' V='0.1082677351130448' F='Sheet.260!Width*0.5'/><Cell N='PinY' V='0.1082677351130448' F='Sheet.260!Height*0.5'/><Cell N='Width' V='0.2165354702260895' F='Sheet.260!Width*1'/><Cell N='Height' V='0.2165354702260895' F='Sheet.260!Height*1'/><Cell N='LocPinX' V='0.1082677351130448' F='Inh'/><Cell N='LocPinY' V='0.1082677351130448' F='Inh'/><Cell N='TxtPinX' V='0.1082677351130448' F='Inh'/><Cell N='TxtPinY' V='0.1082677351130448' F='Inh'/><Cell N='TxtWidth' V='0.1894685364478283' F='Inh'/><Cell N='TxtHeight' V='0.1624016026695672' F='Inh'/><Cell N='TxtLocPinX' V='0.09473426822391416' F='Inh'/><Cell N='TxtLocPinY' V='0.08120080133478358' F='Inh'/><Cell N='ObjType' V='1'/><Section N='Connection'><Row T='Connection' IX='0'><Cell N='X' V='0.1082677351130448' F='Inh'/><Cell N='Y' V='0.2165354702260895' F='Inh'/></Row><Row T='Connection' IX='1'><Cell N='X' V='0.1082677351130448' F='Inh'/><Cell N='Y' V='0.1082677351130448' F='Inh'/></Row><Row T='Connection' IX='2'><Cell N='Y' V='0.1082677351130448' F='Inh'/></Row><Row T='Connection' IX='3'><Cell N='X' V='0.1082677351130448' F='Inh'/></Row><Row T='Connection' IX='4'><Cell N='X' V='0.2165354702260895' F='Inh'/><Cell N='Y' V='0.1082677351130448' F='Inh'/></Row><Row T='Connection' IX='5'><Cell N='X' V='0.03170079284109951' F='Inh'/><Cell N='Y' V='0.03170079284109951' F='Inh'/></Row><Row T='Connection' IX='6'><Cell N='X' V='0.18483467738499' F='Inh'/><Cell N='Y' V='0.03170079284109951' F='Inh'/></Row><Row T='Connection' IX='7'><Cell N='X' V='0.18483467738499' F='Inh'/><Cell N='Y' V='0.18483467738499' F='Inh'/></Row><Row T='Connection' IX='8'><Cell N='X' V='0.03170079284109951' F='Inh'/><Cell N='Y' V='0.18483467738499' F='Inh'/></Row></Section><Section N='Geometry' IX='0'><Row T='MoveTo' IX='1'><Cell N='Y' V='0.1082677351130448' F='Inh'/></Row><Row T='EllipticalArcTo' IX='2'><Cell N='X' V='0.2165354702260895' F='Inh'/><Cell N='Y' V='0.1082677351130448' F='Inh'/><Cell N='A' V='0.1082677351130448' U='DL' F='Inh'/><Cell N='B' V='0.2165354702260895' U='DL' F='Inh'/></Row><Row T='EllipticalArcTo' IX='3'><Cell N='Y' V='0.1082677351130448' F='Inh'/><Cell N='A' V='0.1082677351130448' U='DL' F='Inh'/></Row></Section></Shape><Shape ID='262' NameU='Dynamic connector.11' IsCustomNameU='1' Name='动态连接线.11' IsCustomName='1' Type='Shape' Master='5'><Cell N='PinX' V='0.1082677351130448' F='Inh'/><Cell N='PinY' V='0.1082677351130448' F='Inh'/><Cell N='Width' V='0.1968503937007874' F='GUARD(0.19685039370079DL)'/><Cell N='Height' V='0.1968503937007874' F='GUARD(0.19685039370079DL)'/><Cell N='LocPinX' V='0.09842519685039369' F='Inh'/><Cell N='LocPinY' V='0.09842519685039369' F='Inh'/><Cell N='BeginX' V='0.03170079284109928' F='PAR(PNT(Sheet.261!Connections.X6,Sheet.261!Connections.Y6))'/><Cell N='BeginY' V='0.03170079284109928' F='PAR(PNT(Sheet.261!Connections.X6,Sheet.261!Connections.Y6))'/><Cell N='EndX' V='0.1848346773849903' F='PAR(PNT(Sheet.261!Connections.X8,Sheet.261!Connections.Y8))'/><Cell N='EndY' V='0.1848346773849903' F='PAR(PNT(Sheet.261!Connections.X8,Sheet.261!Connections.Y8))'/><Cell N='LayerMember' V='0'/><Cell N='BegTrigger' V='2' F='_XFTRIGGER(Sheet.261!EventXFMod)'/><Cell N='EndTrigger' V='2' F='_XFTRIGGER(Sheet.261!EventXFMod)'/><Cell N='ShapeRouteStyle' V='16'/><Cell N='ConLineRouteExt' V='1'/><Cell N='TxtPinX' V='0.09842519927769902' F='Inh'/><Cell N='TxtPinY' V='0.09842519927769902' F='Inh'/><Cell N='EndArrow' V='0'/><Section N='Control'><Row N='TextPosition'><Cell N='X' V='0.09842519927769902'/><Cell N='Y' V='0.09842519927769902'/><Cell N='XDyn' V='0.09842519927769902' F='Inh'/><Cell N='YDyn' V='0.09842519927769902' F='Inh'/></Row></Section><Section N='Geometry' IX='0'><Row T='MoveTo' IX='1'><Cell N='X' V='0.0218582545784482'/><Cell N='Y' V='0.0218582545784482'/></Row><Row T='LineTo' IX='2'><Cell N='X' V='0.1749921391223392'/><Cell N='Y' V='0.1749921391223392'/></Row><Row T='LineTo' IX='3' Del='1'/></Section></Shape><Shape ID='263' NameU='Dynamic connector.12' IsCustomNameU='1' Name='动态连接线.12' IsCustomName='1' Type='Shape' Master='5'><Cell N='PinX' V='0.1082677351130448' F='Inh'/><Cell N='PinY' V='0.1082677351130448' F='Inh'/><Cell N='Width' V='0.1968503937007874' F='GUARD(0.19685039370079DL)'/><Cell N='Height' V='-0.1968503937007874' F='GUARD(-0.19685039370079DL)'/><Cell N='LocPinX' V='0.09842519685039369' F='Inh'/><Cell N='LocPinY' V='-0.09842519685039369' F='Inh'/><Cell N='BeginX' V='0.03170079284109928' F='PAR(PNT(Sheet.261!Connections.X9,Sheet.261!Connections.Y9))'/><Cell N='BeginY' V='0.1848346773849903' F='PAR(PNT(Sheet.261!Connections.X9,Sheet.261!Connections.Y9))'/><Cell N='EndX' V='0.1848346773849903' F='PAR(PNT(Sheet.261!Connections.X7,Sheet.261!Connections.Y7))'/><Cell N='EndY' V='0.03170079284109928' F='PAR(PNT(Sheet.261!Connections.X7,Sheet.261!Connections.Y7))'/><Cell N='LayerMember' V='0'/><Cell N='BegTrigger' V='2' F='_XFTRIGGER(Sheet.261!EventXFMod)'/><Cell N='EndTrigger' V='2' F='_XFTRIGGER(Sheet.261!EventXFMod)'/><Cell N='ShapeRouteStyle' V='16'/><Cell N='ConLineRouteExt' V='1'/><Cell N='TxtPinX' V='0.09842519927769902' F='Inh'/><Cell N='TxtPinY' V='-0.09842519927769902' F='Inh'/><Cell N='EndArrow' V='0'/><Section N='Control'><Row N='TextPosition'><Cell N='X' V='0.09842519927769902'/><Cell N='Y' V='-0.09842519927769902'/><Cell N='XDyn' V='0.09842519927769902' F='Inh'/><Cell N='YDyn' V='-0.09842519927769902' F='Inh'/></Row></Section><Section N='Geometry' IX='0'><Row T='MoveTo' IX='1'><Cell N='X' V='0.0218582545784482'/><Cell N='Y' V='-0.0218582545784482'/></Row><Row T='LineTo' IX='2'><Cell N='X' V='0.1749921391223392'/><Cell N='Y' V='-0.1749921391223392'/></Row><Row T='LineTo' IX='3' Del='1'/></Section></Shape></Shapes></Shape><Shape ID='264' NameU='Dynamic connector.166' Name='动态连接线.166' Type='Shape' Master='5'><Cell N='PinX' V='5.990541013606953' U='MM' F='Inh'/><Cell N='PinY' V='4.952519581747628' F='Inh'/><Cell N='Width' V='0.5351223705732213' U='MM' F='GUARD(EndX-BeginX)'/><Cell N='Height' V='0.1968503937007874' F='GUARD(0.19685039370079DL)'/><Cell N='LocPinX' V='0.2675611852866107' U='MM' F='Inh'/><Cell N='LocPinY' V='0.09842519685039369' F='Inh'/><Cell N='BeginX' V='5.722979828320343' F='PAR(PNT(Sheet.261!Connections.X5,Sheet.261!Connections.Y5))'/><Cell N='BeginY' V='4.952497058675551' F='PAR(PNT(Sheet.261!Connections.X5,Sheet.261!Connections.Y5))'/><Cell N='EndX' V='6.258102198893564' U='MM' F='PAR(PNT(Sheet.266!Connections.X3,Sheet.266!Connections.Y3))'/><Cell N='EndY' V='4.952542104819705' F='PAR(PNT(Sheet.266!Connections.X3,Sheet.266!Connections.Y3))'/><Cell N='LayerMember' V='0'/><Cell N='BegTrigger' V='2' F='_XFTRIGGER(Sheet.261!EventXFMod)'/><Cell N='EndTrigger' V='2' F='_XFTRIGGER(Sheet.266!EventXFMod)'/><Cell N='ConFixedCode' V='3'/><Cell N='TxtPinX' V='0.2675611972808838' F='Inh'/><Cell N='TxtPinY' V='0.09842519462108612' F='Inh'/><Cell N='EndArrow' V='0'/><Cell N='FillForegnd' V='#000000' F='Inh'/><Cell N='FillBkgnd' V='#ffffff' F='Inh'/><Cell N='ShdwForegnd' V='#000000' F='Inh'/><Cell N='ShapeShdwShow' V='2'/><Section N='Control'><Row N='TextPosition'><Cell N='X' V='0.2675611972808838'/><Cell N='Y' V='0.09842519462108612'/><Cell N='XDyn' V='0.2675611972808838' F='Inh'/><Cell N='YDyn' V='0.09842519462108612' F='Inh'/></Row></Section><Section N='Geometry' IX='0'><Row T='MoveTo' IX='1'><Cell N='Y' V='0.0984026737783168'/></Row><Row T='LineTo' IX='2'><Cell N='X' V='0.5351223705732204'/><Cell N='Y' V='0.09844771992247026'/></Row><Row T='LineTo' IX='3' Del='1'/></Section></Shape><Shape ID='265' Type='Group' LineStyle='8' FillStyle='8' TextStyle='8'><Cell N='PinX' V='6.366369934006609'/><Cell N='PinY' V='4.952542104819705'/><Cell N='Width' V='0.2165354702260904'/><Cell N='Height' V='0.2165354702260904'/><Cell N='LocPinX' V='0.1082677351130452' F='Width*0.5'/><Cell N='LocPinY' V='0.1082677351130452' F='Height*0.5'/><Cell N='Angle' V='0'/><Cell N='FlipX' V='0'/><Cell N='FlipY' V='0'/><Cell N='ResizeMode' V='0'/><Cell N='QuickStyleVariation' V='2'/><Cell N='ObjType' V='8'/><Cell N='ShapeShdwShow' V='2'/><Shapes><Shape ID='266' NameU='Circle' Name='圆形' Type='Shape' Master='9'><Cell N='PinX' V='0.1082677351130452' F='Sheet.265!Width*0.5'/><Cell N='PinY' V='0.1082677351130452' F='Sheet.265!Height*0.5'/><Cell N='Width' V='0.2165354702260904' F='Sheet.265!Width*1'/><Cell N='Height' V='0.2165354702260904' F='Sheet.265!Height*1'/><Cell N='LocPinX' V='0.1082677351130452' F='Inh'/><Cell N='LocPinY' V='0.1082677351130452' F='Inh'/><Cell N='TxtPinX' V='0.1082677351130452' F='Inh'/><Cell N='TxtPinY' V='0.1082677351130452' F='Inh'/><Cell N='TxtWidth' V='0.1894685364478291' F='Inh'/><Cell N='TxtHeight' V='0.1624016026695678' F='Inh'/><Cell N='TxtLocPinX' V='0.09473426822391456' F='Inh'/><Cell N='TxtLocPinY' V='0.08120080133478391' F='Inh'/><Cell N='ObjType' V='1'/><Section N='Connection'><Row T='Connection' IX='0'><Cell N='X' V='0.1082677351130452' F='Inh'/><Cell N='Y' V='0.2165354702260904' F='Inh'/></Row><Row T='Connection' IX='1'><Cell N='X' V='0.1082677351130452' F='Inh'/><Cell N='Y' V='0.1082677351130452' F='Inh'/></Row><Row T='Connection' IX='2'><Cell N='Y' V='0.1082677351130452' F='Inh'/></Row><Row T='Connection' IX='3'><Cell N='X' V='0.1082677351130452' F='Inh'/></Row><Row T='Connection' IX='4'><Cell N='X' V='0.2165354702260904' F='Inh'/><Cell N='Y' V='0.1082677351130452' F='Inh'/></Row><Row T='Connection' IX='5'><Cell N='X' V='0.03170079284109964' F='Inh'/><Cell N='Y' V='0.03170079284109964' F='Inh'/></Row><Row T='Connection' IX='6'><Cell N='X' V='0.1848346773849908' F='Inh'/><Cell N='Y' V='0.03170079284109964' F='Inh'/></Row><Row T='Connection' IX='7'><Cell N='X' V='0.1848346773849908' F='Inh'/><Cell N='Y' V='0.1848346773849908' F='Inh'/></Row><Row T='Connection' IX='8'><Cell N='X' V='0.03170079284109964' F='Inh'/><Cell N='Y' V='0.1848346773849908' F='Inh'/></Row></Section><Section N='Geometry' IX='0'><Row T='MoveTo' IX='1'><Cell N='Y' V='0.1082677351130452' F='Inh'/></Row><Row T='EllipticalArcTo' IX='2'><Cell N='X' V='0.2165354702260904' F='Inh'/><Cell N='Y' V='0.1082677351130452' F='Inh'/><Cell N='A' V='0.1082677351130452' U='DL' F='Inh'/><Cell N='B' V='0.2165354702260904' U='DL' F='Inh'/></Row><Row T='EllipticalArcTo' IX='3'><Cell N='Y' V='0.1082677351130452' F='Inh'/><Cell N='A' V='0.1082677351130452' U='DL' F='Inh'/></Row></Section></Shape><Shape ID='267' NameU='Dynamic connector.11' IsCustomNameU='1' Name='动态连接线.11' IsCustomName='1' Type='Shape' Master='5'><Cell N='PinX' V='0.1082677351130452' F='Inh'/><Cell N='PinY' V='0.1082677351130452' F='Inh'/><Cell N='Width' V='0.1968503937007874' F='GUARD(0.19685039370079DL)'/><Cell N='Height' V='0.1968503937007874' F='GUARD(0.19685039370079DL)'/><Cell N='LocPinX' V='0.09842519685039369' F='Inh'/><Cell N='LocPinY' V='0.09842519685039369' F='Inh'/><Cell N='BeginX' V='0.03170079284109928' F='PAR(PNT(Sheet.266!Connections.X6,Sheet.266!Connections.Y6))'/><Cell N='BeginY' V='0.03170079284109928' F='PAR(PNT(Sheet.266!Connections.X6,Sheet.266!Connections.Y6))'/><Cell N='EndX' V='0.1848346773849912' F='PAR(PNT(Sheet.266!Connections.X8,Sheet.266!Connections.Y8))'/><Cell N='EndY' V='0.1848346773849912' F='PAR(PNT(Sheet.266!Connections.X8,Sheet.266!Connections.Y8))'/><Cell N='LayerMember' V='0'/><Cell N='BegTrigger' V='2' F='_XFTRIGGER(Sheet.266!EventXFMod)'/><Cell N='EndTrigger' V='2' F='_XFTRIGGER(Sheet.266!EventXFMod)'/><Cell N='ShapeRouteStyle' V='16'/><Cell N='ConLineRouteExt' V='1'/><Cell N='TxtPinX' V='0.09842519927769901' F='Inh'/><Cell N='TxtPinY' V='0.09842519927769904' F='Inh'/><Cell N='EndArrow' V='0'/><Section N='Control'><Row N='TextPosition'><Cell N='X' V='0.09842519927769901'/><Cell N='Y' V='0.09842519927769904'/><Cell N='XDyn' V='0.09842519927769901' F='Inh'/><Cell N='YDyn' V='0.09842519927769904' F='Inh'/></Row></Section><Section N='Geometry' IX='0'><Row T='MoveTo' IX='1'><Cell N='X' V='0.02185825457844731'/><Cell N='Y' V='0.0218582545784482'/></Row><Row T='LineTo' IX='2'><Cell N='X' V='0.1749921391223401'/><Cell N='Y' V='0.1749921391223392'/></Row><Row T='LineTo' IX='3' Del='1'/></Section></Shape><Shape ID='268' NameU='Dynamic connector.12' IsCustomNameU='1' Name='动态连接线.12' IsCustomName='1' Type='Shape' Master='5'><Cell N='PinX' V='0.1082677351130452' F='Inh'/><Cell N='PinY' V='0.1082677351130452' F='Inh'/><Cell N='Width' V='0.1968503937007874' F='GUARD(0.19685039370079DL)'/><Cell N='Height' V='-0.1968503937007874' F='GUARD(-0.19685039370079DL)'/><Cell N='LocPinX' V='0.09842519685039369' F='Inh'/><Cell N='LocPinY' V='-0.09842519685039369' F='Inh'/><Cell N='BeginX' V='0.03170079284109928' F='PAR(PNT(Sheet.266!Connections.X9,Sheet.266!Connections.Y9))'/><Cell N='BeginY' V='0.1848346773849912' F='PAR(PNT(Sheet.266!Connections.X9,Sheet.266!Connections.Y9))'/><Cell N='EndX' V='0.1848346773849912' F='PAR(PNT(Sheet.266!Connections.X7,Sheet.266!Connections.Y7))'/><Cell N='EndY' V='0.03170079284109928' F='PAR(PNT(Sheet.266!Connections.X7,Sheet.266!Connections.Y7))'/><Cell N='LayerMember' V='0'/><Cell N='BegTrigger' V='2' F='_XFTRIGGER(Sheet.266!EventXFMod)'/><Cell N='EndTrigger' V='2' F='_XFTRIGGER(Sheet.266!EventXFMod)'/><Cell N='ShapeRouteStyle' V='16'/><Cell N='ConLineRouteExt' V='1'/><Cell N='TxtPinX' V='0.09842519927769904' F='Inh'/><Cell N='TxtPinY' V='-0.09842519927769904' F='Inh'/><Cell N='EndArrow' V='0'/><Section N='Control'><Row N='TextPosition'><Cell N='X' V='0.09842519927769904'/><Cell N='Y' V='-0.09842519927769901'/><Cell N='XDyn' V='0.09842519927769904' F='Inh'/><Cell N='YDyn' V='-0.09842519927769904' F='Inh'/></Row></Section><Section N='Geometry' IX='0'><Row T='MoveTo' IX='1'><Cell N='X' V='0.02185825457844731'/><Cell N='Y' V='-0.0218582545784482'/></Row><Row T='LineTo' IX='2'><Cell N='X' V='0.1749921391223401'/><Cell N='Y' V='-0.1749921391223392'/></Row><Row T='LineTo' IX='3' Del='1'/></Section></Shape></Shapes></Shape><Shape ID='269' NameU='Dynamic connector.171' Name='动态连接线.171' Type='Shape' Master='5'><Cell N='PinX' V='7.099119641775894' F='Inh'/><Cell N='PinY' V='4.950188421437563' F='Inh'/><Cell N='Width' V='1.248963945312479' F='GUARD(EndX-BeginX)'/><Cell N='Height' V='-0.1968503937007874' F='GUARD(-0.19685039370079DL)'/><Cell N='LocPinX' V='0.6244819726562394' F='Inh'/><Cell N='LocPinY' V='-0.09842519685039369' F='Inh'/><Cell N='BeginX' V='6.474637669119654' F='PAR(PNT(Sheet.266!Connections.X5,Sheet.266!Connections.Y5))'/><Cell N='BeginY' V='4.952542104819705' F='PAR(PNT(Sheet.266!Connections.X5,Sheet.266!Connections.Y5))'/><Cell N='EndX' V='7.723601614432133'/><Cell N='EndY' V='4.947834738055422'/><Cell N='LayerMember' V='0'/><Cell N='BegTrigger' V='2' F='_XFTRIGGER(Sheet.266!EventXFMod)'/><Cell N='EndTrigger' V='1' F='_XFTRIGGER(EventXFMod)'/><Cell N='TxtPinX' V='0.6221282892741005' F='Inh'/><Cell N='TxtPinY' V='-0.100778880232536' F='Inh'/><Cell N='FillForegnd' V='#000000' F='Inh'/><Cell N='FillBkgnd' V='#ffffff' F='Inh'/><Cell N='ShdwForegnd' V='#000000' F='Inh'/><Cell N='ShapeShdwShow' V='2'/><Section N='Control'><Row N='TextPosition'><Cell N='X' V='0.6221282892740997'/><Cell N='Y' V='-0.100778880232536'/><Cell N='XDyn' V='0.6221282892741005' F='Inh'/><Cell N='YDyn' V='-0.100778880232536' F='Inh'/></Row></Section><Section N='Geometry' IX='0'><Row T='MoveTo' IX='1'><Cell N='Y' V='-0.09607151346825216'/></Row><Row T='LineTo' IX='2'><Cell N='X' V='0.07381889763779537'/><Cell N='Y' V='-0.09607151346825216'/></Row><Row T='LineTo' IX='3'><Cell N='X' V='0.07381889763779537'/><Cell N='Y' V='-0.1007788802325358'/></Row><Row T='LineTo' IX='4'><Cell N='X' V='1.248963945312478'/><Cell N='Y' V='-0.1007788802325358'/></Row></Section></Shape><Shape ID='270' Type='Group' LineStyle='8' FillStyle='8' TextStyle='8'><Cell N='PinX' V='7.291048613441503'/><Cell N='PinY' V='4.445866256968494'/><Cell N='Width' V='0.2165354702260887'/><Cell N='Height' V='0.2165354702260887'/><Cell N='LocPinX' V='0.1082677351130443' F='Width*0.5'/><Cell N='LocPinY' V='0.1082677351130443' F='Height*0.5'/><Cell N='Angle' V='0'/><Cell N='FlipX' V='0'/><Cell N='FlipY' V='0'/><Cell N='ResizeMode' V='0'/><Cell N='QuickStyleVariation' V='2'/><Cell N='ObjType' V='8'/><Cell N='ShapeShdwShow' V='2'/><Shapes><Shape ID='271' NameU='Circle' Name='圆形' Type='Shape' Master='9'><Cell N='PinX' V='0.1082677351130443' F='Sheet.270!Width*0.5'/><Cell N='PinY' V='0.1082677351130443' F='Sheet.270!Height*0.5'/><Cell N='Width' V='0.2165354702260887' F='Sheet.270!Width*1'/><Cell N='Height' V='0.2165354702260887' F='Sheet.270!Height*1'/><Cell N='LocPinX' V='0.1082677351130443' F='Inh'/><Cell N='LocPinY' V='0.1082677351130443' F='Inh'/><Cell N='TxtPinX' V='0.1082677351130443' F='Inh'/><Cell N='TxtPinY' V='0.1082677351130443' F='Inh'/><Cell N='TxtWidth' V='0.1894685364478276' F='Inh'/><Cell N='TxtHeight' V='0.1624016026695665' F='Inh'/><Cell N='TxtLocPinX' V='0.09473426822391379' F='Inh'/><Cell N='TxtLocPinY' V='0.08120080133478325' F='Inh'/><Cell N='ObjType' V='1'/><Section N='Connection'><Row T='Connection' IX='0'><Cell N='X' V='0.1082677351130443' F='Inh'/><Cell N='Y' V='0.2165354702260887' F='Inh'/></Row><Row T='Connection' IX='1'><Cell N='X' V='0.1082677351130443' F='Inh'/><Cell N='Y' V='0.1082677351130443' F='Inh'/></Row><Row T='Connection' IX='2'><Cell N='Y' V='0.1082677351130443' F='Inh'/></Row><Row T='Connection' IX='3'><Cell N='X' V='0.1082677351130443' F='Inh'/></Row><Row T='Connection' IX='4'><Cell N='X' V='0.2165354702260887' F='Inh'/><Cell N='Y' V='0.1082677351130443' F='Inh'/></Row><Row T='Connection' IX='5'><Cell N='X' V='0.03170079284109938' F='Inh'/><Cell N='Y' V='0.03170079284109938' F='Inh'/></Row><Row T='Connection' IX='6'><Cell N='X' V='0.1848346773849893' F='Inh'/><Cell N='Y' V='0.03170079284109938' F='Inh'/></Row><Row T='Connection' IX='7'><Cell N='X' V='0.1848346773849893' F='Inh'/><Cell N='Y' V='0.1848346773849893' F='Inh'/></Row><Row T='Connection' IX='8'><Cell N='X' V='0.03170079284109938' F='Inh'/><Cell N='Y' V='0.1848346773849893' F='Inh'/></Row></Section><Section N='Geometry' IX='0'><Row T='MoveTo' IX='1'><Cell N='Y' V='0.1082677351130443' F='Inh'/></Row><Row T='EllipticalArcTo' IX='2'><Cell N='X' V='0.2165354702260887' F='Inh'/><Cell N='Y' V='0.1082677351130443' F='Inh'/><Cell N='A' V='0.1082677351130443' U='DL' F='Inh'/><Cell N='B' V='0.2165354702260887' U='DL' F='Inh'/></Row><Row T='EllipticalArcTo' IX='3'><Cell N='Y' V='0.1082677351130443' F='Inh'/><Cell N='A' V='0.1082677351130443' U='DL' F='Inh'/></Row></Section></Shape><Shape ID='272' NameU='Dynamic connector.11' IsCustomNameU='1' Name='动态连接线.11' IsCustomName='1' Type='Shape' Master='5'><Cell N='PinX' V='0.1082677351130443' F='Inh'/><Cell N='PinY' V='0.1082677351130443' F='Inh'/><Cell N='Width' V='0.1968503937007874' F='GUARD(0.19685039370079DL)'/><Cell N='Height' V='0.1968503937007874' F='GUARD(0.19685039370079DL)'/><Cell N='LocPinX' V='0.09842519685039369' F='Inh'/><Cell N='LocPinY' V='0.09842519685039369' F='Inh'/><Cell N='BeginX' V='0.03170079284109928' F='PAR(PNT(Sheet.271!Connections.X6,Sheet.271!Connections.Y6))'/><Cell N='BeginY' V='0.03170079284109928' F='PAR(PNT(Sheet.271!Connections.X6,Sheet.271!Connections.Y6))'/><Cell N='EndX' V='0.1848346773849894' F='PAR(PNT(Sheet.271!Connections.X8,Sheet.271!Connections.Y8))'/><Cell N='EndY' V='0.1848346773849894' F='PAR(PNT(Sheet.271!Connections.X8,Sheet.271!Connections.Y8))'/><Cell N='LayerMember' V='0'/><Cell N='BegTrigger' V='2' F='_XFTRIGGER(Sheet.271!EventXFMod)'/><Cell N='EndTrigger' V='2' F='_XFTRIGGER(Sheet.271!EventXFMod)'/><Cell N='ShapeRouteStyle' V='16'/><Cell N='ConLineRouteExt' V='1'/><Cell N='TxtPinX' V='0.09842519927769901' F='Inh'/><Cell N='TxtPinY' V='0.09842519927769904' F='Inh'/><Cell N='EndArrow' V='0'/><Section N='Control'><Row N='TextPosition'><Cell N='X' V='0.09842519927769901'/><Cell N='Y' V='0.09842519927769904'/><Cell N='XDyn' V='0.09842519927769901' F='Inh'/><Cell N='YDyn' V='0.09842519927769904' F='Inh'/></Row></Section><Section N='Geometry' IX='0'><Row T='MoveTo' IX='1'><Cell N='X' V='0.02185825457844909'/><Cell N='Y' V='0.02185825457844864'/></Row><Row T='LineTo' IX='2'><Cell N='X' V='0.1749921391223383'/><Cell N='Y' V='0.1749921391223387'/></Row><Row T='LineTo' IX='3' Del='1'/></Section></Shape><Shape ID='273' NameU='Dynamic connector.12' IsCustomNameU='1' Name='动态连接线.12' IsCustomName='1' Type='Shape' Master='5'><Cell N='PinX' V='0.1082677351130443' F='Inh'/><Cell N='PinY' V='0.1082677351130443' F='Inh'/><Cell N='Width' V='0.1968503937007874' F='GUARD(0.19685039370079DL)'/><Cell N='Height' V='-0.1968503937007874' F='GUARD(-0.19685039370079DL)'/><Cell N='LocPinX' V='0.09842519685039369' F='Inh'/><Cell N='LocPinY' V='-0.09842519685039369' F='Inh'/><Cell N='BeginX' V='0.03170079284109928' F='PAR(PNT(Sheet.271!Connections.X9,Sheet.271!Connections.Y9))'/><Cell N='BeginY' V='0.1848346773849894' F='PAR(PNT(Sheet.271!Connections.X9,Sheet.271!Connections.Y9))'/><Cell N='EndX' V='0.1848346773849894' F='PAR(PNT(Sheet.271!Connections.X7,Sheet.271!Connections.Y7))'/><Cell N='EndY' V='0.03170079284109928' F='PAR(PNT(Sheet.271!Connections.X7,Sheet.271!Connections.Y7))'/><Cell N='LayerMember' V='0'/><Cell N='BegTrigger' V='2' F='_XFTRIGGER(Sheet.271!EventXFMod)'/><Cell N='EndTrigger' V='2' F='_XFTRIGGER(Sheet.271!EventXFMod)'/><Cell N='ShapeRouteStyle' V='16'/><Cell N='ConLineRouteExt' V='1'/><Cell N='TxtPinX' V='0.09842519927769904' F='Inh'/><Cell N='TxtPinY' V='-0.09842519927769904' F='Inh'/><Cell N='EndArrow' V='0'/><Section N='Control'><Row N='TextPosition'><Cell N='X' V='0.09842519927769904'/><Cell N='Y' V='-0.09842519927769901'/><Cell N='XDyn' V='0.09842519927769904' F='Inh'/><Cell N='YDyn' V='-0.09842519927769904' F='Inh'/></Row></Section><Section N='Geometry' IX='0'><Row T='MoveTo' IX='1'><Cell N='X' V='0.02185825457844909'/><Cell N='Y' V='-0.02185825457844864'/></Row><Row T='LineTo' IX='2'><Cell N='X' V='0.1749921391223383'/><Cell N='Y' V='-0.1749921391223387'/></Row><Row T='LineTo' IX='3' Del='1'/></Section></Shape></Shapes></Shape><Shape ID='274' Type='Group' LineStyle='8' FillStyle='8' TextStyle='8'><Cell N='PinX' V='6.366611575940953'/><Cell N='PinY' V='4.44586626932814'/><Cell N='Width' V='0.2165354702260901'/><Cell N='Height' V='0.21653547022609'/><Cell N='LocPinX' V='0.108267735113045' F='Width*0.5'/><Cell N='LocPinY' V='0.108267735113045' F='Height*0.5'/><Cell N='Angle' V='0'/><Cell N='FlipX' V='0'/><Cell N='FlipY' V='0'/><Cell N='ResizeMode' V='0'/><Cell N='QuickStyleVariation' V='2'/><Cell N='ObjType' V='8'/><Cell N='ShapeShdwShow' V='2'/><Shapes><Shape ID='275' NameU='Circle' Name='圆形' Type='Shape' Master='9'><Cell N='PinX' V='0.108267735113045' F='Sheet.274!Width*0.5'/><Cell N='PinY' V='0.108267735113045' F='Sheet.274!Height*0.5'/><Cell N='Width' V='0.21653547022609' F='Sheet.274!Width*1'/><Cell N='Height' V='0.21653547022609' F='Sheet.274!Height*1'/><Cell N='LocPinX' V='0.108267735113045' F='Inh'/><Cell N='LocPinY' V='0.108267735113045' F='Inh'/><Cell N='TxtPinX' V='0.108267735113045' F='Inh'/><Cell N='TxtPinY' V='0.108267735113045' F='Inh'/><Cell N='TxtWidth' V='0.1894685364478288' F='Inh'/><Cell N='TxtHeight' V='0.1624016026695676' F='Inh'/><Cell N='TxtLocPinX' V='0.0947342682239144' F='Inh'/><Cell N='TxtLocPinY' V='0.08120080133478377' F='Inh'/><Cell N='ObjType' V='1'/><Section N='Connection'><Row T='Connection' IX='0'><Cell N='X' V='0.108267735113045' F='Inh'/><Cell N='Y' V='0.21653547022609' F='Inh'/></Row><Row T='Connection' IX='1'><Cell N='X' V='0.108267735113045' F='Inh'/><Cell N='Y' V='0.108267735113045' F='Inh'/></Row><Row T='Connection' IX='2'><Cell N='Y' V='0.108267735113045' F='Inh'/></Row><Row T='Connection' IX='3'><Cell N='X' V='0.108267735113045' F='Inh'/></Row><Row T='Connection' IX='4'><Cell N='X' V='0.21653547022609' F='Inh'/><Cell N='Y' V='0.108267735113045' F='Inh'/></Row><Row T='Connection' IX='5'><Cell N='X' V='0.03170079284109958' F='Inh'/><Cell N='Y' V='0.03170079284109958' F='Inh'/></Row><Row T='Connection' IX='6'><Cell N='X' V='0.1848346773849905' F='Inh'/><Cell N='Y' V='0.03170079284109958' F='Inh'/></Row><Row T='Connection' IX='7'><Cell N='X' V='0.1848346773849905' F='Inh'/><Cell N='Y' V='0.1848346773849905' F='Inh'/></Row><Row T='Connection' IX='8'><Cell N='X' V='0.03170079284109958' F='Inh'/><Cell N='Y' V='0.1848346773849905' F='Inh'/></Row></Section><Section N='Geometry' IX='0'><Row T='MoveTo' IX='1'><Cell N='Y' V='0.108267735113045' F='Inh'/></Row><Row T='EllipticalArcTo' IX='2'><Cell N='X' V='0.21653547022609' F='Inh'/><Cell N='Y' V='0.108267735113045' F='Inh'/><Cell N='A' V='0.108267735113045' U='DL' F='Inh'/><Cell N='B' V='0.21653547022609' U='DL' F='Inh'/></Row><Row T='EllipticalArcTo' IX='3'><Cell N='Y' V='0.108267735113045' F='Inh'/><Cell N='A' V='0.108267735113045' U='DL' F='Inh'/></Row></Section></Shape><Shape ID='276' NameU='Dynamic connector.11' IsCustomNameU='1' Name='动态连接线.11' IsCustomName='1' Type='Shape' Master='5'><Cell N='PinX' V='0.1082677351130448' F='Inh'/><Cell N='PinY' V='0.1082677351130448' F='Inh'/><Cell N='Width' V='0.1968503937007874' F='GUARD(0.19685039370079DL)'/><Cell N='Height' V='0.1968503937007874' F='GUARD(0.19685039370079DL)'/><Cell N='LocPinX' V='0.09842519685039369' F='Inh'/><Cell N='LocPinY' V='0.09842519685039369' F='Inh'/><Cell N='BeginX' V='0.03170079284109928' F='PAR(PNT(Sheet.275!Connections.X6,Sheet.275!Connections.Y6))'/><Cell N='BeginY' V='0.03170079284109928' F='PAR(PNT(Sheet.275!Connections.X6,Sheet.275!Connections.Y6))'/><Cell N='EndX' V='0.1848346773849903' F='PAR(PNT(Sheet.275!Connections.X8,Sheet.275!Connections.Y8))'/><Cell N='EndY' V='0.1848346773849903' F='PAR(PNT(Sheet.275!Connections.X8,Sheet.275!Connections.Y8))'/><Cell N='LayerMember' V='0'/><Cell N='BegTrigger' V='2' F='_XFTRIGGER(Sheet.275!EventXFMod)'/><Cell N='EndTrigger' V='2' F='_XFTRIGGER(Sheet.275!EventXFMod)'/><Cell N='ShapeRouteStyle' V='16'/><Cell N='ConLineRouteExt' V='1'/><Cell N='TxtPinX' V='0.09842519927769902' F='Inh'/><Cell N='TxtPinY' V='0.09842519927769902' F='Inh'/><Cell N='EndArrow' V='0'/><Section N='Control'><Row N='TextPosition'><Cell N='X' V='0.09842519927769902'/><Cell N='Y' V='0.09842519927769902'/><Cell N='XDyn' V='0.09842519927769902' F='Inh'/><Cell N='YDyn' V='0.09842519927769902' F='Inh'/></Row></Section><Section N='Geometry' IX='0'><Row T='MoveTo' IX='1'><Cell N='X' V='0.0218582545784482'/><Cell N='Y' V='0.0218582545784482'/></Row><Row T='LineTo' IX='2'><Cell N='X' V='0.1749921391223392'/><Cell N='Y' V='0.1749921391223392'/></Row><Row T='LineTo' IX='3' Del='1'/></Section></Shape><Shape ID='277' NameU='Dynamic connector.12' IsCustomNameU='1' Name='动态连接线.12' IsCustomName='1' Type='Shape' Master='5'><Cell N='PinX' V='0.1082677351130448' F='Inh'/><Cell N='PinY' V='0.1082677351130448' F='Inh'/><Cell N='Width' V='0.1968503937007874' F='GUARD(0.19685039370079DL)'/><Cell N='Height' V='-0.1968503937007874' F='GUARD(-0.19685039370079DL)'/><Cell N='LocPinX' V='0.09842519685039369' F='Inh'/><Cell N='LocPinY' V='-0.09842519685039369' F='Inh'/><Cell N='BeginX' V='0.03170079284109928' F='PAR(PNT(Sheet.275!Connections.X9,Sheet.275!Connections.Y9))'/><Cell N='BeginY' V='0.1848346773849903' F='PAR(PNT(Sheet.275!Connections.X9,Sheet.275!Connections.Y9))'/><Cell N='EndX' V='0.1848346773849903' F='PAR(PNT(Sheet.275!Connections.X7,Sheet.275!Connections.Y7))'/><Cell N='EndY' V='0.03170079284109928' F='PAR(PNT(Sheet.275!Connections.X7,Sheet.275!Connections.Y7))'/><Cell N='LayerMember' V='0'/><Cell N='BegTrigger' V='2' F='_XFTRIGGER(Sheet.275!EventXFMod)'/><Cell N='EndTrigger' V='2' F='_XFTRIGGER(Sheet.275!EventXFMod)'/><Cell N='ShapeRouteStyle' V='16'/><Cell N='ConLineRouteExt' V='1'/><Cell N='TxtPinX' V='0.09842519927769902' F='Inh'/><Cell N='TxtPinY' V='-0.09842519927769902' F='Inh'/><Cell N='EndArrow' V='0'/><Section N='Control'><Row N='TextPosition'><Cell N='X' V='0.09842519927769902'/><Cell N='Y' V='-0.09842519927769902'/><Cell N='XDyn' V='0.09842519927769902' F='Inh'/><Cell N='YDyn' V='-0.09842519927769902' F='Inh'/></Row></Section><Section N='Geometry' IX='0'><Row T='MoveTo' IX='1'><Cell N='X' V='0.0218582545784482'/><Cell N='Y' V='-0.0218582545784482'/></Row><Row T='LineTo' IX='2'><Cell N='X' V='0.1749921391223392'/><Cell N='Y' V='-0.1749921391223392'/></Row><Row T='LineTo' IX='3' Del='1'/></Section></Shape></Shapes></Shape><Shape ID='278' NameU='Dynamic connector.180' Name='动态连接线.180' Type='Shape' Master='5'><Cell N='PinX' V='6.366490754973781' F='Inh'/><Cell N='PinY' V='4.699204187073923' U='MM' F='Inh'/><Cell N='Width' V='-0.1968503937007874' F='GUARD(-0.19685039370079DL)'/><Cell N='Height' V='0.2901403652654757' U='MM' F='GUARD(EndY-BeginY)'/><Cell N='LocPinX' V='-0.09842519685039369' F='Inh'/><Cell N='LocPinY' V='0.1450701826327379' U='MM' F='Inh'/><Cell N='BeginX' V='6.366611575940953' F='PAR(PNT(Sheet.275!Connections.X1,Sheet.275!Connections.Y1))'/><Cell N='BeginY' V='4.554134004441185' F='PAR(PNT(Sheet.275!Connections.X1,Sheet.275!Connections.Y1))'/><Cell N='EndX' V='6.366369934006609' F='PAR(PNT(Sheet.266!Connections.X4,Sheet.266!Connections.Y4))'/><Cell N='EndY' V='4.84427436970666' U='MM' F='PAR(PNT(Sheet.266!Connections.X4,Sheet.266!Connections.Y4))'/><Cell N='LayerMember' V='0'/><Cell N='BegTrigger' V='2' F='_XFTRIGGER(Sheet.275!EventXFMod)'/><Cell N='EndTrigger' V='2' F='_XFTRIGGER(Sheet.266!EventXFMod)'/><Cell N='TxtPinX' V='-0.09830437588322141' F='Inh'/><Cell N='TxtPinY' V='0.1451910035999093' F='Inh'/><Cell N='FillForegnd' V='#000000' F='Inh'/><Cell N='FillBkgnd' V='#ffffff' F='Inh'/><Cell N='ShdwForegnd' V='#000000' F='Inh'/><Cell N='ShapeShdwShow' V='2'/><Section N='Control'><Row N='TextPosition'><Cell N='X' V='-0.09830437588322141'/><Cell N='Y' V='0.1451910035999098'/><Cell N='XDyn' V='-0.09830437588322141' F='Inh'/><Cell N='YDyn' V='0.1451910035999093' F='Inh'/></Row></Section><Section N='Geometry' IX='0'><Row T='MoveTo' IX='1'><Cell N='X' V='-0.09830437588322205'/></Row><Row T='LineTo' IX='2'><Cell N='X' V='-0.09830437588322205'/><Cell N='Y' V='0.1476377952755907'/></Row><Row T='LineTo' IX='3'><Cell N='X' V='-0.09854601781756589'/><Cell N='Y' V='0.1476377952755907'/></Row><Row T='LineTo' IX='4'><Cell N='X' V='-0.09854601781756589'/><Cell N='Y' V='0.2901403652654748'/></Row></Section></Shape><Shape ID='279' NameU='Rectangle.181' Name='矩形.181' Type='Shape' Master='4'><Cell N='PinX' V='5.617302251795404'/><Cell N='PinY' V='3.983267518107532'/><Cell N='Width' V='0.2165354702260904'/><Cell N='Height' V='0.23622047026656'/><Cell N='LocPinX' V='0.1082677351130452' F='Inh'/><Cell N='LocPinY' V='0.11811023513328' F='Inh'/><Cell N='ObjType' V='1'/><Cell N='ShapeShdwShow' V='2'/><Section N='Connection'><Row T='Connection' IX='0'><Cell N='X' V='0.1082677351130452' F='Inh'/></Row><Row T='Connection' IX='1'><Cell N='X' V='0.2165354702260904' F='Inh'/><Cell N='Y' V='0.11811023513328' F='Inh'/></Row><Row T='Connection' IX='2'><Cell N='X' V='0.1082677351130452' F='Inh'/><Cell N='Y' V='0.23622047026656' F='Inh'/></Row><Row T='Connection' IX='3'><Cell N='Y' V='0.11811023513328' F='Inh'/></Row><Row T='Connection' IX='4'><Cell N='X' V='0.1082677351130452' F='Inh'/><Cell N='Y' V='0.11811023513328' F='Inh'/></Row></Section><Section N='Geometry' IX='0'><Row T='LineTo' IX='2'><Cell N='X' V='0.2165354702260904' F='Inh'/></Row><Row T='LineTo' IX='3'><Cell N='X' V='0.2165354702260904' F='Inh'/><Cell N='Y' V='0.23622047026656' F='Inh'/></Row><Row T='LineTo' IX='4'><Cell N='Y' V='0.23622047026656' F='Inh'/></Row></Section></Shape><Shape ID='280' NameU='Dynamic connector.182' Name='动态连接线.182' Type='Shape' Master='5'><Cell N='PinX' V='5.616007172501351' F='Inh'/><Cell N='PinY' V='4.472803538401659' U='MM' F='Inh'/><Cell N='Width' V='-0.1968503937007874' F='GUARD(-0.19685039370079DL)'/><Cell N='Height' V='0.7428515703216938' U='MM' F='GUARD(EndY-BeginY)'/><Cell N='LocPinX' V='-0.09842519685039369' F='Inh'/><Cell N='LocPinY' V='0.3714257851608469' U='MM' F='Inh'/><Cell N='BeginX' V='5.617302251795404' F='PAR(PNT(Sheet.279!Connections.X3,Sheet.279!Connections.Y3))'/><Cell N='BeginY' V='4.101377753240812' F='PAR(PNT(Sheet.279!Connections.X3,Sheet.279!Connections.Y3))'/><Cell N='EndX' V='5.614712093207298' F='PAR(PNT(Sheet.261!Connections.X4,Sheet.261!Connections.Y4))'/><Cell N='EndY' V='4.844229323562506' U='MM' F='PAR(PNT(Sheet.261!Connections.X4,Sheet.261!Connections.Y4))'/><Cell N='LayerMember' V='0'/><Cell N='BegTrigger' V='2' F='_XFTRIGGER(Sheet.279!EventXFMod)'/><Cell N='EndTrigger' V='2' F='_XFTRIGGER(Sheet.261!EventXFMod)'/><Cell N='TxtPinX' V='-0.09842519834637642' F='Inh'/><Cell N='TxtPinY' V='0.3714257776737213' F='Inh'/><Cell N='ConFixedCode' V='3'/><Cell N='FillForegnd' V='#000000' F='Inh'/><Cell N='FillBkgnd' V='#ffffff' F='Inh'/><Cell N='ShdwForegnd' V='#000000' F='Inh'/><Cell N='ShapeShdwShow' V='2'/><Section N='Control'><Row N='TextPosition'><Cell N='X' V='-0.09842519834637642'/><Cell N='Y' V='0.3714257776737213'/><Cell N='XDyn' V='-0.09842519834637642' F='Inh'/><Cell N='YDyn' V='0.3714257776737213' F='Inh'/></Row></Section><Section N='Geometry' IX='0'><Row T='MoveTo' IX='1'><Cell N='X' V='-0.09713011755634149'/></Row><Row T='LineTo' IX='2'><Cell N='X' V='-0.09972027614444645'/><Cell N='Y' V='0.7428515703216965'/></Row><Row T='LineTo' IX='3' Del='1'/></Section></Shape><Shape ID='281' NameU='Rectangle.183' Name='矩形.183' Type='Shape' Master='4'><Cell N='PinX' V='6.007722225159767'/><Cell N='PinY' V='3.983267518107531'/><Cell N='Width' V='0.2165354702260904'/><Cell N='Height' V='0.23622047026656'/><Cell N='LocPinX' V='0.1082677351130452' F='Inh'/><Cell N='LocPinY' V='0.11811023513328' F='Inh'/><Cell N='ObjType' V='1'/><Cell N='ShapeShdwShow' V='2'/><Section N='Connection'><Row T='Connection' IX='0'><Cell N='X' V='0.1082677351130452' F='Inh'/></Row><Row T='Connection' IX='1'><Cell N='X' V='0.2165354702260904' F='Inh'/><Cell N='Y' V='0.11811023513328' F='Inh'/></Row><Row T='Connection' IX='2'><Cell N='X' V='0.1082677351130452' F='Inh'/><Cell N='Y' V='0.23622047026656' F='Inh'/></Row><Row T='Connection' IX='3'><Cell N='Y' V='0.11811023513328' F='Inh'/></Row><Row T='Connection' IX='4'><Cell N='X' V='0.1082677351130452' F='Inh'/><Cell N='Y' V='0.11811023513328' F='Inh'/></Row></Section><Section N='Geometry' IX='0'><Row T='LineTo' IX='2'><Cell N='X' V='0.2165354702260904' F='Inh'/></Row><Row T='LineTo' IX='3'><Cell N='X' V='0.2165354702260904' F='Inh'/><Cell N='Y' V='0.23622047026656' F='Inh'/></Row><Row T='LineTo' IX='4'><Cell N='Y' V='0.23622047026656' F='Inh'/></Row></Section></Shape><Shape ID='282' NameU='Rectangle.184' Name='矩形.184' Type='Shape' Master='4'><Cell N='PinX' V='6.366646132383555'/><Cell N='PinY' V='3.983267518107531'/><Cell N='Width' V='0.3468503937007874'/><Cell N='Height' V='0.23622047026656'/><Cell N='LocPinX' V='0.1734251968503937' F='Inh'/><Cell N='LocPinY' V='0.11811023513328' F='Inh'/><Cell N='ObjType' V='1'/><Cell N='ShapeShdwShow' V='2'/><Section N='Connection'><Row T='Connection' IX='0'><Cell N='X' V='0.1734251968503937' F='Inh'/></Row><Row T='Connection' IX='1'><Cell N='X' V='0.3468503937007874' F='Inh'/><Cell N='Y' V='0.11811023513328' F='Inh'/></Row><Row T='Connection' IX='2'><Cell N='X' V='0.1734251968503937' F='Inh'/><Cell N='Y' V='0.23622047026656' F='Inh'/></Row><Row T='Connection' IX='3'><Cell N='Y' V='0.11811023513328' F='Inh'/></Row><Row T='Connection' IX='4'><Cell N='X' V='0.1734251968503937' F='Inh'/><Cell N='Y' V='0.11811023513328' F='Inh'/></Row></Section><Section N='Geometry' IX='0'><Row T='LineTo' IX='2'><Cell N='X' V='0.3468503937007874' F='Inh'/></Row><Row T='LineTo' IX='3'><Cell N='X' V='0.3468503937007874' F='Inh'/><Cell N='Y' V='0.23622047026656' F='Inh'/></Row><Row T='LineTo' IX='4'><Cell N='Y' V='0.23622047026656' F='Inh'/></Row></Section></Shape><Shape ID='283' NameU='Rectangle.185' Name='矩形.185' Type='Shape' Master='4'><Cell N='PinX' V='6.867302281784943'/><Cell N='PinY' V='3.983267518107531'/><Cell N='Width' V='0.2165354702260904'/><Cell N='Height' V='0.23622047026656'/><Cell N='LocPinX' V='0.1082677351130452' F='Inh'/><Cell N='LocPinY' V='0.11811023513328' F='Inh'/><Cell N='ObjType' V='1'/><Cell N='ShapeShdwShow' V='2'/><Section N='Connection'><Row T='Connection' IX='0'><Cell N='X' V='0.1082677351130452' F='Inh'/></Row><Row T='Connection' IX='1'><Cell N='X' V='0.2165354702260904' F='Inh'/><Cell N='Y' V='0.11811023513328' F='Inh'/></Row><Row T='Connection' IX='2'><Cell N='X' V='0.1082677351130452' F='Inh'/><Cell N='Y' V='0.23622047026656' F='Inh'/></Row><Row T='Connection' IX='3'><Cell N='Y' V='0.11811023513328' F='Inh'/></Row><Row T='Connection' IX='4'><Cell N='X' V='0.1082677351130452' F='Inh'/><Cell N='Y' V='0.11811023513328' F='Inh'/></Row></Section><Section N='Geometry' IX='0'><Row T='LineTo' IX='2'><Cell N='X' V='0.2165354702260904' F='Inh'/></Row><Row T='LineTo' IX='3'><Cell N='X' V='0.2165354702260904' F='Inh'/><Cell N='Y' V='0.23622047026656' F='Inh'/></Row><Row T='LineTo' IX='4'><Cell N='Y' V='0.23622047026656' F='Inh'/></Row></Section></Shape><Shape ID='284' NameU='Dynamic connector.186' Name='动态连接线.186' Type='Shape' Master='5'><Cell N='PinX' V='6.133033032993838' U='MM' F='Inh'/><Cell N='PinY' V='4.273622011284475' F='Inh'/><Cell N='Width' V='0.250621615668142' U='MM' F='GUARD(EndX-BeginX)'/><Cell N='Height' V='0.3444885160873294' F='GUARD(EndY-BeginY)'/><Cell N='LocPinX' V='0.1253108078340706' U='MM' F='Inh'/><Cell N='LocPinY' V='0.1722442580436647' F='Inh'/><Cell N='BeginX' V='6.007722225159767' F='PAR(PNT(Sheet.281!Connections.X3,Sheet.281!Connections.Y3))'/><Cell N='BeginY' V='4.10137775324081' F='PAR(PNT(Sheet.281!Connections.X3,Sheet.281!Connections.Y3))'/><Cell N='EndX' V='6.258343840827909' U='MM' F='PAR(PNT(Sheet.275!Connections.X3,Sheet.275!Connections.Y3))'/><Cell N='EndY' V='4.44586626932814' F='PAR(PNT(Sheet.275!Connections.X3,Sheet.275!Connections.Y3))'/><Cell N='LayerMember' V='0'/><Cell N='BegTrigger' V='2' F='_XFTRIGGER(Sheet.281!EventXFMod)'/><Cell N='EndTrigger' V='2' F='_XFTRIGGER(Sheet.275!EventXFMod)'/><Cell N='TxtPinY' V='0.2975550658777355' F='Inh'/><Cell N='FillForegnd' V='#000000' F='Inh'/><Cell N='FillBkgnd' V='#ffffff' F='Inh'/><Cell N='ShdwForegnd' V='#000000' F='Inh'/><Cell N='ShapeShdwShow' V='2'/><Section N='Control'><Row N='TextPosition'><Cell N='Y' V='0.2975550658777361'/><Cell N='YDyn' V='0.2975550658777355' F='Inh'/></Row></Section><Section N='Geometry' IX='0'><Row T='LineTo' IX='2'><Cell N='Y' V='0.3444885160873286'/></Row><Row T='LineTo' IX='3'><Cell N='X' V='0.250621615668142'/><Cell N='Y' V='0.3444885160873286'/></Row></Section></Shape><Shape ID='285' NameU='Dynamic connector.187' Name='动态连接线.187' Type='Shape' Master='5'><Cell N='PinX' V='6.366628854162254' F='Inh'/><Cell N='PinY' V='4.219488143727952' U='MM' F='Inh'/><Cell N='Width' V='-0.1968503937007874' F='GUARD(-0.19685039370079DL)'/><Cell N='Height' V='0.2362207809742847' U='MM' F='GUARD(EndY-BeginY)'/><Cell N='LocPinX' V='-0.09842519685039369' F='Inh'/><Cell N='LocPinY' V='0.1181103904871423' U='MM' F='Inh'/><Cell N='BeginX' V='6.366646132383555' F='PAR(PNT(Sheet.282!Connections.X3,Sheet.282!Connections.Y3))'/><Cell N='BeginY' V='4.10137775324081' F='PAR(PNT(Sheet.282!Connections.X3,Sheet.282!Connections.Y3))'/><Cell N='EndX' V='6.366611575940953' F='PAR(PNT(Sheet.275!Connections.X4,Sheet.275!Connections.Y4))'/><Cell N='EndY' V='4.337598534215095' U='MM' F='PAR(PNT(Sheet.275!Connections.X4,Sheet.275!Connections.Y4))'/><Cell N='LayerMember' V='0'/><Cell N='BegTrigger' V='2' F='_XFTRIGGER(Sheet.282!EventXFMod)'/><Cell N='EndTrigger' V='2' F='_XFTRIGGER(Sheet.275!EventXFMod)'/><Cell N='TxtPinX' V='-0.09844247507169346' F='Inh'/><Cell N='TxtPinY' V='0.1180931122658426' F='Inh'/><Cell N='EndArrow' V='0'/><Cell N='FillForegnd' V='#000000' F='Inh'/><Cell N='FillBkgnd' V='#ffffff' F='Inh'/><Cell N='ShdwForegnd' V='#000000' F='Inh'/><Cell N='ShapeShdwShow' V='2'/><Section N='Control'><Row N='TextPosition'><Cell N='X' V='-0.09844247507169168'/><Cell N='Y' V='0.1180931122658435'/><Cell N='XDyn' V='-0.09844247507169346' F='Inh'/><Cell N='YDyn' V='0.1180931122658426' F='Inh'/></Row></Section><Section N='Geometry' IX='0'><Row T='MoveTo' IX='1'><Cell N='X' V='-0.09840791862909448'/></Row><Row T='LineTo' IX='2'><Cell N='X' V='-0.09840791862909448'/><Cell N='Y' V='0.07381889763779537'/></Row><Row T='LineTo' IX='3'><Cell N='X' V='-0.09844247507169257'/><Cell N='Y' V='0.07381889763779537'/></Row><Row T='LineTo' IX='4'><Cell N='X' V='-0.09844247507169257'/><Cell N='Y' V='0.2362207809742838'/></Row></Section></Shape><Shape ID='286' NameU='Rectangle.188' Name='矩形.188' Type='Shape' Master='4'><Cell N='PinX' V='7.290530604994021'/><Cell N='PinY' V='4.770669173858718'/><Cell N='Width' V='0.3641732054200788'/><Cell N='Height' V='0.23622047026656'/><Cell N='LocPinX' V='0.1820866027100394' F='Inh'/><Cell N='LocPinY' V='0.11811023513328' F='Inh'/><Cell N='ObjType' V='1'/><Cell N='ShapeShdwShow' V='2'/><Section N='Connection'><Row T='Connection' IX='0'><Cell N='X' V='0.1820866027100394' F='Inh'/></Row><Row T='Connection' IX='1'><Cell N='X' V='0.3641732054200788' F='Inh'/><Cell N='Y' V='0.11811023513328' F='Inh'/></Row><Row T='Connection' IX='2'><Cell N='X' V='0.1820866027100394' F='Inh'/><Cell N='Y' V='0.23622047026656' F='Inh'/></Row><Row T='Connection' IX='3'><Cell N='Y' V='0.11811023513328' F='Inh'/></Row><Row T='Connection' IX='4'><Cell N='X' V='0.1820866027100394' F='Inh'/><Cell N='Y' V='0.11811023513328' F='Inh'/></Row></Section><Section N='Geometry' IX='0'><Row T='LineTo' IX='2'><Cell N='X' V='0.3641732054200788' F='Inh'/></Row><Row T='LineTo' IX='3'><Cell N='X' V='0.3641732054200788' F='Inh'/><Cell N='Y' V='0.23622047026656' F='Inh'/></Row><Row T='LineTo' IX='4'><Cell N='Y' V='0.23622047026656' F='Inh'/></Row></Section></Shape><Shape ID='287' NameU='Dynamic connector.189' Name='动态连接线.189' Type='Shape' Master='5'><Cell N='PinX' V='7.025041580056701' U='MM' F='Inh'/><Cell N='PinY' V='4.273622005104652' F='Inh'/><Cell N='Width' V='0.3154785965435156' U='MM' F='GUARD(EndX-BeginX)'/><Cell N='Height' V='0.3444885037276837' F='GUARD(EndY-BeginY)'/><Cell N='LocPinX' V='0.1577392982717578' U='MM' F='Inh'/><Cell N='LocPinY' V='0.1722442518638419' F='Inh'/><Cell N='BeginX' V='6.867302281784943' F='PAR(PNT(Sheet.283!Connections.X3,Sheet.283!Connections.Y3))'/><Cell N='BeginY' V='4.10137775324081' F='PAR(PNT(Sheet.283!Connections.X3,Sheet.283!Connections.Y3))'/><Cell N='EndX' V='7.182780878328459' U='MM' F='PAR(PNT(Sheet.271!Connections.X3,Sheet.271!Connections.Y3))'/><Cell N='EndY' V='4.445866256968494' F='PAR(PNT(Sheet.271!Connections.X3,Sheet.271!Connections.Y3))'/><Cell N='LayerMember' V='0'/><Cell N='BegTrigger' V='2' F='_XFTRIGGER(Sheet.283!EventXFMod)'/><Cell N='EndTrigger' V='2' F='_XFTRIGGER(Sheet.271!EventXFMod)'/><Cell N='TxtPinY' V='0.3299835501355978' F='Inh'/><Cell N='FillForegnd' V='#000000' F='Inh'/><Cell N='FillBkgnd' V='#ffffff' F='Inh'/><Cell N='ShdwForegnd' V='#000000' F='Inh'/><Cell N='ShapeShdwShow' V='2'/><Section N='Control'><Row N='TextPosition'><Cell N='Y' V='0.3299835501355971'/><Cell N='YDyn' V='0.3299835501355978' F='Inh'/></Row></Section><Section N='Geometry' IX='0'><Row T='LineTo' IX='2'><Cell N='Y' V='0.3444885037276828'/></Row><Row T='LineTo' IX='3'><Cell N='X' V='0.3154785965435103'/><Cell N='Y' V='0.3444885037276828'/></Row></Section></Shape><Shape ID='288' NameU='Dynamic connector.190' Name='动态连接线.190' Type='Shape' Master='5'><Cell N='PinX' V='7.290789609217762' F='Inh'/><Cell N='PinY' V='4.603346465403488' U='MM' F='Inh'/><Cell N='Width' V='-0.1968503937007874' F='GUARD(-0.19685039370079DL)'/><Cell N='Height' V='0.1968503937007874' F='GUARD(0.19685039370079DL)'/><Cell N='LocPinX' V='-0.09842519685039369' F='Inh'/><Cell N='LocPinY' V='0.09842519685039369' F='Inh'/><Cell N='BeginX' V='7.291048613441503' F='PAR(PNT(Sheet.271!Connections.X1,Sheet.271!Connections.Y1))'/><Cell N='BeginY' V='4.554133992081539' F='PAR(PNT(Sheet.271!Connections.X1,Sheet.271!Connections.Y1))'/><Cell N='EndX' V='7.290530604994021' F='PAR(PNT(Sheet.286!Connections.X1,Sheet.286!Connections.Y1))'/><Cell N='EndY' V='4.652558938725439' U='MM' F='PAR(PNT(Sheet.286!Connections.X1,Sheet.286!Connections.Y1))'/><Cell N='LayerMember' V='0'/><Cell N='BegTrigger' V='2' F='_XFTRIGGER(Sheet.271!EventXFMod)'/><Cell N='EndTrigger' V='2' F='_XFTRIGGER(Sheet.286!EventXFMod)'/><Cell N='TxtPinX' V='-0.09868420107413511' F='Inh'/><Cell N='TxtPinY' V='0.09816619262665291' F='Inh'/><Cell N='EndArrow' V='0'/><Cell N='FillForegnd' V='#000000' F='Inh'/><Cell N='FillBkgnd' V='#ffffff' F='Inh'/><Cell N='ShdwForegnd' V='#000000' F='Inh'/><Cell N='ShapeShdwShow' V='2'/><Section N='Control'><Row N='TextPosition'><Cell N='X' V='-0.09868420107413423'/><Cell N='Y' V='0.09816619262665424'/><Cell N='XDyn' V='-0.09868420107413511' F='Inh'/><Cell N='YDyn' V='0.09816619262665291' F='Inh'/></Row></Section><Section N='Geometry' IX='0'><Row T='MoveTo' IX='1'><Cell N='X' V='-0.09816619262665505'/><Cell N='Y' V='0.04921272352844408'/></Row><Row T='LineTo' IX='2'><Cell N='X' V='-0.09816619262665505'/><Cell N='Y' V='0.08612217234734132'/></Row><Row T='LineTo' IX='3'><Cell N='X' V='-0.09868420107413289'/><Cell N='Y' V='0.08612217234734132'/></Row><Row T='LineTo' IX='4'><Cell N='X' V='-0.09868420107413289'/><Cell N='Y' V='0.1476376701723439'/></Row></Section></Shape><Shape ID='289' NameU='Dynamic connector.191' Name='动态连接线.191' Type='Shape' Master='5'><Cell N='PinX' V='5.617466353973479' F='Inh'/><Cell N='PinY' V='3.657152112404072' F='Inh'/><Cell N='Width' V='0.1968503937007874' F='GUARD(0.19685039370079DL)'/><Cell N='Height' V='-0.1968503937007874' F='GUARD(-0.19685039370079DL)'/><Cell N='LocPinX' V='0.09842519685039369' F='Inh'/><Cell N='LocPinY' V='-0.09842519685039369' F='Inh'/><Cell N='BeginX' V='5.617302324900645'/><Cell N='BeginY' V='3.707677046787274'/><Cell N='EndX' V='5.617630383046314' F='PAR(PNT(Sheet.296!Connections.X1,Sheet.296!Connections.Y1))'/><Cell N='EndY' V='3.606627178020869' F='PAR(PNT(Sheet.296!Connections.X1,Sheet.296!Connections.Y1))'/><Cell N='LayerMember' V='0'/><Cell N='BegTrigger' V='1' F='_XFTRIGGER(EventXFMod)'/><Cell N='EndTrigger' V='2' F='_XFTRIGGER(Sheet.296!EventXFMod)'/><Cell N='ConFixedCode' V='3'/><Cell N='TxtPinX' V='0.09842519834637642' F='Inh'/><Cell N='TxtPinY' V='-0.09842519648373116' F='Inh'/><Cell N='EndArrow' V='0'/><Cell N='FillForegnd' V='#000000' F='Inh'/><Cell N='FillBkgnd' V='#ffffff' F='Inh'/><Cell N='ShdwForegnd' V='#000000' F='Inh'/><Cell N='ShapeShdwShow' V='2'/><Section N='Control'><Row N='TextPosition'><Cell N='X' V='0.09842519834637642'/><Cell N='Y' V='-0.09842519648373116'/><Cell N='XDyn' V='0.09842519834637642' F='Inh'/><Cell N='YDyn' V='-0.09842519648373116' F='Inh'/></Row></Section><Section N='Geometry' IX='0'><Row T='MoveTo' IX='1'><Cell N='X' V='0.09826116777755889'/><Cell N='Y' V='-0.04790026246719092'/></Row><Row T='LineTo' IX='2'><Cell N='X' V='0.09858922592322816'/><Cell N='Y' V='-0.1489501312335966'/></Row><Row T='LineTo' IX='3' Del='1'/></Section></Shape><Shape ID='290' NameU='Dynamic connector.192' Name='动态连接线.192' Type='Shape' Master='5'><Cell N='PinX' V='5.489349538865523' F='Inh'/><Cell N='PinY' V='3.784627431974594' F='Inh'/><Cell N='Width' V='0.255905425859762' F='GUARD(EndX-BeginX)'/><Cell N='Height' V='0.1968503937007874' F='GUARD(0.19685039370079DL)'/><Cell N='LocPinX' V='0.1279527129298812' F='Inh'/><Cell N='LocPinY' V='0.09842519685039369' F='Inh'/><Cell N='BeginX' V='5.361396825935642'/><Cell N='BeginY' V='3.709824410515677'/><Cell N='EndX' V='5.617302251795404'/><Cell N='EndY' V='3.85943045343351'/><Cell N='LayerMember' V='0'/><Cell N='BegTrigger' V='1' F='_XFTRIGGER(EventXFMod)'/><Cell N='EndTrigger' V='1' F='_XFTRIGGER(EventXFMod)'/><Cell N='ConFixedCode' V='3'/><Cell N='TxtPinX' V='0.2027557343887979' F='Inh'/><Cell N='TxtPinY' V='0.02362217539147721' F='Inh'/><Cell N='EndArrow' V='0'/><Cell N='FillForegnd' V='#000000' F='Inh'/><Cell N='FillBkgnd' V='#ffffff' F='Inh'/><Cell N='ShdwForegnd' V='#000000' F='Inh'/><Cell N='ShapeShdwShow' V='2'/><Section N='Control'><Row N='TextPosition'><Cell N='X' V='0.2027557343887979'/><Cell N='Y' V='0.02362217539147704'/><Cell N='XDyn' V='0.2027557343887979' F='Inh'/><Cell N='YDyn' V='0.02362217539147721' F='Inh'/></Row></Section><Section N='Geometry' IX='0'><Row T='MoveTo' IX='1'><Cell N='Y' V='0.02362217539147693'/></Row><Row T='LineTo' IX='2'><Cell N='X' V='0.255905425859762'/><Cell N='Y' V='0.02362217539147693'/></Row><Row T='LineTo' IX='3'><Cell N='X' V='0.255905425859762'/><Cell N='Y' V='0.1732282183093101'/></Row></Section></Shape><Shape ID='291' NameU='Dynamic connector.193' Name='动态连接线.193' Type='Shape' Master='5'><Cell N='PinX' V='5.802669743076122' F='Inh'/><Cell N='PinY' V='3.786417263033123' U='MM' F='Inh'/><Cell N='Width' V='0.4101049641672887' F='GUARD(EndX-BeginX)'/><Cell N='Height' V='0.1968503937007874' F='GUARD(0.19685039370079DL)'/><Cell N='LocPinX' V='0.2050524820836444' F='Inh'/><Cell N='LocPinY' V='0.09842519685039369' F='Inh'/><Cell N='BeginX' V='5.597617260992478'/><Cell N='BeginY' V='3.707677243091995'/><Cell N='EndX' V='6.007722225159767' F='PAR(PNT(Sheet.281!Connections.X1,Sheet.281!Connections.Y1))'/><Cell N='EndY' V='3.865157282974251' U='MM' F='PAR(PNT(Sheet.281!Connections.X1,Sheet.281!Connections.Y1))'/><Cell N='LayerMember' V='0'/><Cell N='BegTrigger' V='1' F='_XFTRIGGER(EventXFMod)'/><Cell N='EndTrigger' V='2' F='_XFTRIGGER(Sheet.281!EventXFMod)'/><Cell N='ConFixedCode' V='3'/><Cell N='TxtPinX' V='0.2837925020247741' F='Inh'/><Cell N='TxtPinY' V='0.01968517690926586' F='Inh'/><Cell N='EndArrow' V='0'/><Cell N='FillForegnd' V='#000000' F='Inh'/><Cell N='FillBkgnd' V='#ffffff' F='Inh'/><Cell N='ShdwForegnd' V='#000000' F='Inh'/><Cell N='ShapeShdwShow' V='2'/><Section N='Control'><Row N='TextPosition'><Cell N='X' V='0.283792502024774'/><Cell N='Y' V='0.01968517690926604'/><Cell N='XDyn' V='0.2837925020247741' F='Inh'/><Cell N='YDyn' V='0.01968517690926586' F='Inh'/></Row></Section><Section N='Geometry' IX='0'><Row T='MoveTo' IX='1'><Cell N='Y' V='0.01968517690926586'/></Row><Row T='LineTo' IX='2'><Cell N='X' V='0.4101049641672931'/><Cell N='Y' V='0.01968517690926586'/></Row><Row T='LineTo' IX='3'><Cell N='X' V='0.4101049641672931'/><Cell N='Y' V='0.1771652167915216'/></Row></Section></Shape><Shape ID='292' NameU='Dynamic connector.194' Name='动态连接线.194' Type='Shape' Master='5'><Cell N='PinX' V='6.187184178771661' F='Inh'/><Cell N='PinY' V='3.786417164880763' U='MM' F='Inh'/><Cell N='Width' V='0.3589239072237884' F='GUARD(EndX-BeginX)'/><Cell N='Height' V='0.1968503937007874' F='GUARD(0.19685039370079DL)'/><Cell N='LocPinX' V='0.1794619536118942' F='Inh'/><Cell N='LocPinY' V='0.09842519685039369' F='Inh'/><Cell N='BeginX' V='6.007722225159767'/><Cell N='BeginY' V='3.707677046787274'/><Cell N='EndX' V='6.366646132383555' F='PAR(PNT(Sheet.282!Connections.X1,Sheet.282!Connections.Y1))'/><Cell N='EndY' V='3.865157282974251' U='MM' F='PAR(PNT(Sheet.282!Connections.X1,Sheet.282!Connections.Y1))'/><Cell N='LayerMember' V='0'/><Cell N='BegTrigger' V='1' F='_XFTRIGGER(EventXFMod)'/><Cell N='EndTrigger' V='2' F='_XFTRIGGER(Sheet.282!EventXFMod)'/><Cell N='ConFixedCode' V='3'/><Cell N='TxtPinX' V='0.2582020717053806' F='Inh'/><Cell N='TxtPinY' V='0.01968507875690495' F='Inh'/><Cell N='EndArrow' V='0'/><Cell N='FillForegnd' V='#000000' F='Inh'/><Cell N='FillBkgnd' V='#ffffff' F='Inh'/><Cell N='ShdwForegnd' V='#000000' F='Inh'/><Cell N='ShapeShdwShow' V='2'/><Section N='Control'><Row N='TextPosition'><Cell N='X' V='0.2582020717053805'/><Cell N='Y' V='0.01968507875690511'/><Cell N='XDyn' V='0.2582020717053806' F='Inh'/><Cell N='YDyn' V='0.01968507875690495' F='Inh'/></Row></Section><Section N='Geometry' IX='0'><Row T='MoveTo' IX='1'><Cell N='Y' V='0.01968507875690539'/></Row><Row T='LineTo' IX='2'><Cell N='X' V='0.3589239072237831'/><Cell N='Y' V='0.01968507875690539'/></Row><Row T='LineTo' IX='3'><Cell N='X' V='0.3589239072237831'/><Cell N='Y' V='0.1771653149438821'/></Row></Section></Shape><Shape ID='293' NameU='Dynamic connector.195' Name='动态连接线.195' Type='Shape' Master='5'><Cell N='PinX' V='6.616322390150055' F='Inh'/><Cell N='PinY' V='3.786417164880763' U='MM' F='Inh'/><Cell N='Width' V='0.5019597832697773' F='GUARD(EndX-BeginX)'/><Cell N='Height' V='0.1968503937007874' F='GUARD(0.19685039370079DL)'/><Cell N='LocPinX' V='0.2509798916348887' F='Inh'/><Cell N='LocPinY' V='0.09842519685039369' F='Inh'/><Cell N='BeginX' V='6.365342498515166'/><Cell N='BeginY' V='3.707677046787274'/><Cell N='EndX' V='6.867302281784943' F='PAR(PNT(Sheet.283!Connections.X1,Sheet.283!Connections.Y1))'/><Cell N='EndY' V='3.865157282974251' U='MM' F='PAR(PNT(Sheet.283!Connections.X1,Sheet.283!Connections.Y1))'/><Cell N='LayerMember' V='0'/><Cell N='BegTrigger' V='1' F='_XFTRIGGER(EventXFMod)'/><Cell N='EndTrigger' V='2' F='_XFTRIGGER(Sheet.283!EventXFMod)'/><Cell N='ConFixedCode' V='3'/><Cell N='TxtPinX' V='0.3297200097283777' F='Inh'/><Cell N='TxtPinY' V='0.01968507875690495' F='Inh'/><Cell N='EndArrow' V='0'/><Cell N='FillForegnd' V='#000000' F='Inh'/><Cell N='FillBkgnd' V='#ffffff' F='Inh'/><Cell N='ShdwForegnd' V='#000000' F='Inh'/><Cell N='ShapeShdwShow' V='2'/><Section N='Control'><Row N='TextPosition'><Cell N='X' V='0.3297200097283771'/><Cell N='Y' V='0.01968507875690511'/><Cell N='XDyn' V='0.3297200097283777' F='Inh'/><Cell N='YDyn' V='0.01968507875690495' F='Inh'/></Row></Section><Section N='Geometry' IX='0'><Row T='MoveTo' IX='1'><Cell N='Y' V='0.01968507875690539'/></Row><Row T='LineTo' IX='2'><Cell N='X' V='0.5019597832697755'/><Cell N='Y' V='0.01968507875690539'/></Row><Row T='LineTo' IX='3'><Cell N='X' V='0.5019597832697755'/><Cell N='Y' V='0.1771653149438821'/></Row></Section></Shape><Shape ID='294' NameU='Dynamic connector.196' Name='动态连接线.196' Type='Shape' Master='5'><Cell N='PinX' V='7.290530604994021' F='Inh'/><Cell N='PinY' V='4.920275471984125' F='Inh'/><Cell N='Width' V='-0.1968503937007874' F='GUARD(-0.19685039370079DL)'/><Cell N='Height' V='0.1968503937007874' F='GUARD(0.19685039370079DL)'/><Cell N='LocPinX' V='-0.09842519685039369' F='Inh'/><Cell N='LocPinY' V='0.09842519685039369' F='Inh'/><Cell N='BeginX' V='7.290530604994021' F='PAR(PNT(Sheet.286!Connections.X3,Sheet.286!Connections.Y3))'/><Cell N='BeginY' V='4.888779408991999' F='PAR(PNT(Sheet.286!Connections.X3,Sheet.286!Connections.Y3))'/><Cell N='EndX' V='7.290530604994021'/><Cell N='EndY' V='4.95177153497625'/><Cell N='LayerMember' V='0'/><Cell N='BegTrigger' V='2' F='_XFTRIGGER(Sheet.286!EventXFMod)'/><Cell N='EndTrigger' V='1' F='_XFTRIGGER(EventXFMod)'/><Cell N='TxtPinX' V='-0.09842519462108613' F='Inh'/><Cell N='TxtPinY' V='0.09842519462108611' F='Inh'/><Cell N='EndArrow' V='0'/><Cell N='FillForegnd' V='#000000' F='Inh'/><Cell N='FillBkgnd' V='#ffffff' F='Inh'/><Cell N='ShdwForegnd' V='#000000' F='Inh'/><Cell N='ShapeShdwShow' V='2'/><Section N='Control'><Row N='TextPosition'><Cell N='X' V='-0.09842519462108613'/><Cell N='Y' V='0.09842519462108611'/><Cell N='XDyn' V='-0.09842519462108613' F='Inh'/><Cell N='YDyn' V='0.09842519462108611' F='Inh'/></Row></Section><Section N='Geometry' IX='0'><Row T='MoveTo' IX='1'><Cell N='X' V='-0.09842519685039264'/><Cell N='Y' V='0.06692913385826849'/></Row><Row T='LineTo' IX='2'><Cell N='X' V='-0.09842519685039441'/><Cell N='Y' V='0.1299212598425195'/></Row><Row T='LineTo' IX='3' Del='1'/></Section></Shape><Shape ID='295' NameU='Dynamic connector.197' Name='动态连接线.197' Type='Shape' Master='5'><Cell N='PinX' V='7.527515224108356' F='Inh'/><Cell N='PinY' V='4.457372318075331' F='Inh'/><Cell N='Width' V='0.1968503937007874' F='GUARD(0.19685039370079DL)'/><Cell N='Height' V='1.499390542576113' F='GUARD(EndY-BeginY)'/><Cell N='LocPinX' V='0.09842519685039369' F='Inh'/><Cell N='LocPinY' V='0.7496952712880562' F='Inh'/><Cell N='BeginX' V='7.526751215390759'/><Cell N='BeginY' V='3.707677046787274'/><Cell N='EndX' V='7.528279232825953' F='_WALKGLUE(EndTrigger,BegTrigger,WalkPreference)'/><Cell N='EndY' V='5.207067589363387' F='_WALKGLUE(EndTrigger,BegTrigger,WalkPreference)'/><Cell N='LayerMember' V='0'/><Cell N='BegTrigger' V='1' F='_XFTRIGGER(EventXFMod)'/><Cell N='EndTrigger' V='2' F='_XFTRIGGER(Sheet.304!EventXFMod)'/><Cell N='TxtPinX' V='0.09842519834637642' F='Inh'/><Cell N='TxtPinY' V='0.7496953010559082' F='Inh'/><Cell N='ConFixedCode' V='3'/><Cell N='FillForegnd' V='#000000' F='Inh'/><Cell N='FillBkgnd' V='#ffffff' F='Inh'/><Cell N='ShdwForegnd' V='#000000' F='Inh'/><Cell N='ShapeShdwShow' V='2'/><Section N='Control'><Row N='TextPosition'><Cell N='X' V='0.09842519834637642'/><Cell N='Y' V='0.7496953010559082'/><Cell N='XDyn' V='0.09842519834637642' F='Inh'/><Cell N='YDyn' V='0.7496953010559082' F='Inh'/></Row></Section><Section N='Geometry' IX='0'><Row T='MoveTo' IX='1'><Cell N='X' V='0.09766118813279689'/></Row><Row T='LineTo' IX='2'><Cell N='X' V='0.09918920556799016'/><Cell N='Y' V='1.499390542576113'/></Row><Row T='LineTo' IX='3' Del='1'/></Section></Shape><Shape ID='296' NameU='Circle.198' Name='圆形.198' Type='Shape' Master='9'><Cell N='PinX' V='5.617630383046314'/><Cell N='PinY' V='3.479986804488786'/><Cell N='Width' V='0.2532807470641663'/><Cell N='Height' V='0.2532807470641663'/><Cell N='LocPinX' V='0.1266403735320831' F='Inh'/><Cell N='LocPinY' V='0.1266403735320831' F='Inh'/><Cell N='TxtPinX' V='0.1266403735320831' F='Inh'/><Cell N='TxtPinY' V='0.1266403735320831' F='Inh'/><Cell N='TxtWidth' V='0.2216206536811455' F='Inh'/><Cell N='TxtHeight' V='0.1899605602981247' F='Inh'/><Cell N='TxtLocPinX' V='0.1108103268405727' F='Inh'/><Cell N='TxtLocPinY' V='0.09498028014906235' F='Inh'/><Cell N='ObjType' V='1'/><Cell N='ShapeShdwShow' V='2'/><Section N='Connection'><Row T='Connection' IX='0'><Cell N='X' V='0.1266403735320831' F='Inh'/><Cell N='Y' V='0.2532807470641663' F='Inh'/></Row><Row T='Connection' IX='1'><Cell N='X' V='0.1266403735320831' F='Inh'/><Cell N='Y' V='0.1266403735320831' F='Inh'/></Row><Row T='Connection' IX='2'><Cell N='Y' V='0.1266403735320831' F='Inh'/></Row><Row T='Connection' IX='3'><Cell N='X' V='0.1266403735320831' F='Inh'/></Row><Row T='Connection' IX='4'><Cell N='X' V='0.2532807470641663' F='Inh'/><Cell N='Y' V='0.1266403735320831' F='Inh'/></Row><Row T='Connection' IX='5'><Cell N='X' V='0.03708030137019394' F='Inh'/><Cell N='Y' V='0.03708030137019394' F='Inh'/></Row><Row T='Connection' IX='6'><Cell N='X' V='0.2162004456939723' F='Inh'/><Cell N='Y' V='0.03708030137019394' F='Inh'/></Row><Row T='Connection' IX='7'><Cell N='X' V='0.2162004456939723' F='Inh'/><Cell N='Y' V='0.2162004456939723' F='Inh'/></Row><Row T='Connection' IX='8'><Cell N='X' V='0.03708030137019394' F='Inh'/><Cell N='Y' V='0.2162004456939723' F='Inh'/></Row></Section><Section N='Geometry' IX='0'><Row T='MoveTo' IX='1'><Cell N='Y' V='0.1266403735320831' F='Inh'/></Row><Row T='EllipticalArcTo' IX='2'><Cell N='X' V='0.2532807470641663' F='Inh'/><Cell N='Y' V='0.1266403735320831' F='Inh'/><Cell N='A' V='0.1266403735320831' U='DL' F='Inh'/><Cell N='B' V='0.2532807470641663' U='DL' F='Inh'/></Row><Row T='EllipticalArcTo' IX='3'><Cell N='Y' V='0.1266403735320831' F='Inh'/><Cell N='A' V='0.1266403735320831' U='DL' F='Inh'/></Row></Section></Shape><Shape ID='297' Type='Foreign' LineStyle='2' FillStyle='2' TextStyle='2'><Cell N='PinX' V='5.614712093207298'/><Cell N='PinY' V='3.983267518107531'/><Cell N='Width' V='0.1665354330708662'/><Cell N='Height' V='0.152755905511811'/><Cell N='LocPinX' V='0.08326771653543308' F='Width*0.5'/><Cell N='LocPinY' V='0.0763779527559055' F='Height*0.5'/><Cell N='Angle' V='0'/><Cell N='FlipX' V='0'/><Cell N='FlipY' V='0'/><Cell N='ResizeMode' V='0'/><Cell N='ImgOffsetX' V='0' F='ImgWidth*0'/><Cell N='ImgOffsetY' V='0' F='ImgHeight*0'/><Cell N='ImgWidth' V='0.1665354330708662' F='Width*1'/><Cell N='ImgHeight' V='0.152755905511811' F='Height*1'/><Cell N='ClippingPath' V='' F='No Formula' E='#N/A'/><Cell N='TxtPinX' V='0.08326771653543308' F='Width*0.5'/><Cell N='TxtPinY' V='0' F='Height*0'/><Cell N='TxtWidth' V='0.1665354330708662' F='Width*1'/><Cell N='TxtHeight' V='0' F='Height*0'/><Cell N='TxtLocPinX' V='0.08326771653543308' F='TxtWidth*0.5'/><Cell N='TxtLocPinY' V='0' F='TxtHeight*0.5'/><Cell N='TxtAngle' V='0'/><Cell N='VerticalAlign' V='0'/><Cell N='ShapeShdwShow' V='2'/><Section N='Geometry' IX='0'><Cell N='NoFill' V='0'/><Cell N='NoLine' V='0'/><Cell N='NoShow' V='0'/><Cell N='NoSnap' V='0'/><Cell N='NoQuickDrag' V='0'/><Row T='RelMoveTo' IX='1'><Cell N='X' V='0'/><Cell N='Y' V='0'/></Row><Row T='RelLineTo' IX='2'><Cell N='X' V='1'/><Cell N='Y' V='0'/></Row><Row T='RelLineTo' IX='3'><Cell N='X' V='1'/><Cell N='Y' V='1'/></Row><Row T='RelLineTo' IX='4'><Cell N='X' V='0'/><Cell N='Y' V='1'/></Row><Row T='RelLineTo' IX='5'><Cell N='X' V='0'/><Cell N='Y' V='0'/></Row></Section><ForeignData ForeignType='Object' ObjectType='33280' ShowAsIcon='0' ObjectWidth='0.16653543307087' ObjectHeight='0.15275590551181'><Rel r:id='rId8'/></ForeignData></Shape><Shape ID='298' Type='Foreign' LineStyle='2' FillStyle='2' TextStyle='2'><Cell N='PinX' V='6.007722225159767'/><Cell N='PinY' V='3.983267518107531'/><Cell N='Width' V='0.1665354330708662'/><Cell N='Height' V='0.152755905511811'/><Cell N='LocPinX' V='0.08326771653543308' F='Width*0.5'/><Cell N='LocPinY' V='0.0763779527559055' F='Height*0.5'/><Cell N='Angle' V='0'/><Cell N='FlipX' V='0'/><Cell N='FlipY' V='0'/><Cell N='ResizeMode' V='0'/><Cell N='ImgOffsetX' V='0' F='ImgWidth*0'/><Cell N='ImgOffsetY' V='0' F='ImgHeight*0'/><Cell N='ImgWidth' V='0.1665354330708662' F='Width*1'/><Cell N='ImgHeight' V='0.152755905511811' F='Height*1'/><Cell N='ClippingPath' V='' F='No Formula' E='#N/A'/><Cell N='TxtPinX' V='0.08326771653543308' F='Width*0.5'/><Cell N='TxtPinY' V='0' F='Height*0'/><Cell N='TxtWidth' V='0.1665354330708662' F='Width*1'/><Cell N='TxtHeight' V='0' F='Height*0'/><Cell N='TxtLocPinX' V='0.08326771653543308' F='TxtWidth*0.5'/><Cell N='TxtLocPinY' V='0' F='TxtHeight*0.5'/><Cell N='TxtAngle' V='0'/><Cell N='VerticalAlign' V='0'/><Cell N='ShapeShdwShow' V='2'/><Section N='Geometry' IX='0'><Cell N='NoFill' V='0'/><Cell N='NoLine' V='0'/><Cell N='NoShow' V='0'/><Cell N='NoSnap' V='0'/><Cell N='NoQuickDrag' V='0'/><Row T='RelMoveTo' IX='1'><Cell N='X' V='0'/><Cell N='Y' V='0'/></Row><Row T='RelLineTo' IX='2'><Cell N='X' V='1'/><Cell N='Y' V='0'/></Row><Row T='RelLineTo' IX='3'><Cell N='X' V='1'/><Cell N='Y' V='1'/></Row><Row T='RelLineTo' IX='4'><Cell N='X' V='0'/><Cell N='Y' V='1'/></Row><Row T='RelLineTo' IX='5'><Cell N='X' V='0'/><Cell N='Y' V='0'/></Row></Section><ForeignData ForeignType='Object' ObjectType='33280' ShowAsIcon='0' ObjectWidth='0.16653543307087' ObjectHeight='0.15275590551181'><Rel r:id='rId10'/></ForeignData></Shape><Shape ID='299' Type='Foreign' LineStyle='2' FillStyle='2' TextStyle='2'><Cell N='PinX' V='6.867302281784943'/><Cell N='PinY' V='3.983267518107531'/><Cell N='Width' V='0.1665354330708662'/><Cell N='Height' V='0.152755905511811'/><Cell N='LocPinX' V='0.08326771653543308' F='Width*0.5'/><Cell N='LocPinY' V='0.0763779527559055' F='Height*0.5'/><Cell N='Angle' V='0'/><Cell N='FlipX' V='0'/><Cell N='FlipY' V='0'/><Cell N='ResizeMode' V='0'/><Cell N='ImgOffsetX' V='0' F='ImgWidth*0'/><Cell N='ImgOffsetY' V='0' F='ImgHeight*0'/><Cell N='ImgWidth' V='0.1665354330708662' F='Width*1'/><Cell N='ImgHeight' V='0.152755905511811' F='Height*1'/><Cell N='ClippingPath' V='' F='No Formula' E='#N/A'/><Cell N='TxtPinX' V='0.08326771653543308' F='Width*0.5'/><Cell N='TxtPinY' V='0' F='Height*0'/><Cell N='TxtWidth' V='0.1665354330708662' F='Width*1'/><Cell N='TxtHeight' V='0' F='Height*0'/><Cell N='TxtLocPinX' V='0.08326771653543308' F='TxtWidth*0.5'/><Cell N='TxtLocPinY' V='0' F='TxtHeight*0.5'/><Cell N='TxtAngle' V='0'/><Cell N='VerticalAlign' V='0'/><Cell N='ShapeShdwShow' V='2'/><Section N='Geometry' IX='0'><Cell N='NoFill' V='0'/><Cell N='NoLine' V='0'/><Cell N='NoShow' V='0'/><Cell N='NoSnap' V='0'/><Cell N='NoQuickDrag' V='0'/><Row T='RelMoveTo' IX='1'><Cell N='X' V='0'/><Cell N='Y' V='0'/></Row><Row T='RelLineTo' IX='2'><Cell N='X' V='1'/><Cell N='Y' V='0'/></Row><Row T='RelLineTo' IX='3'><Cell N='X' V='1'/><Cell N='Y' V='1'/></Row><Row T='RelLineTo' IX='4'><Cell N='X' V='0'/><Cell N='Y' V='1'/></Row><Row T='RelLineTo' IX='5'><Cell N='X' V='0'/><Cell N='Y' V='0'/></Row></Section><ForeignData ForeignType='Object' ObjectType='33280' ShowAsIcon='0' ObjectWidth='0.16653543307087' ObjectHeight='0.15275590551181'><Rel r:id='rId12'/></ForeignData></Shape><Shape ID='300' Type='Foreign' LineStyle='2' FillStyle='2' TextStyle='2'><Cell N='PinX' V='6.366646132383555'/><Cell N='PinY' V='3.983267518107533'/><Cell N='Width' V='0.3468503937007874'/><Cell N='Height' V='0.1940944881889764'/><Cell N='LocPinX' V='0.1734251968503937' F='Width*0.5'/><Cell N='LocPinY' V='0.09704724409448819' F='Height*0.5'/><Cell N='Angle' V='0'/><Cell N='FlipX' V='0'/><Cell N='FlipY' V='0'/><Cell N='ResizeMode' V='0'/><Cell N='ImgOffsetX' V='0' F='ImgWidth*0'/><Cell N='ImgOffsetY' V='0' F='ImgHeight*0'/><Cell N='ImgWidth' V='0.3468503937007874' F='Width*1'/><Cell N='ImgHeight' V='0.1940944881889764' F='Height*1'/><Cell N='ClippingPath' V='' F='No Formula' E='#N/A'/><Cell N='TxtPinX' V='0.1734251968503937' F='Width*0.5'/><Cell N='TxtPinY' V='0' F='Height*0'/><Cell N='TxtWidth' V='0.3468503937007874' F='Width*1'/><Cell N='TxtHeight' V='0' F='Height*0'/><Cell N='TxtLocPinX' V='0.1734251968503937' F='TxtWidth*0.5'/><Cell N='TxtLocPinY' V='0' F='TxtHeight*0.5'/><Cell N='TxtAngle' V='0'/><Cell N='VerticalAlign' V='0'/><Cell N='ShapeShdwShow' V='2'/><Section N='Geometry' IX='0'><Cell N='NoFill' V='0'/><Cell N='NoLine' V='0'/><Cell N='NoShow' V='0'/><Cell N='NoSnap' V='0'/><Cell N='NoQuickDrag' V='0'/><Row T='RelMoveTo' IX='1'><Cell N='X' V='0'/><Cell N='Y' V='0'/></Row><Row T='RelLineTo' IX='2'><Cell N='X' V='1'/><Cell N='Y' V='0'/></Row><Row T='RelLineTo' IX='3'><Cell N='X' V='1'/><Cell N='Y' V='1'/></Row><Row T='RelLineTo' IX='4'><Cell N='X' V='0'/><Cell N='Y' V='1'/></Row><Row T='RelLineTo' IX='5'><Cell N='X' V='0'/><Cell N='Y' V='0'/></Row></Section><ForeignData ForeignType='Object' ObjectType='33280' ShowAsIcon='0' ObjectWidth='0.34685039370079' ObjectHeight='0.19409448818898'><Rel r:id='rId14'/></ForeignData></Shape><Shape ID='301' Type='Foreign' LineStyle='2' FillStyle='2' TextStyle='2'><Cell N='PinX' V='7.290530604994021'/><Cell N='PinY' V='4.77066917385872'/><Cell N='Width' V='0.3468503937007874'/><Cell N='Height' V='0.1940944881889764'/><Cell N='LocPinX' V='0.1734251968503937' F='Width*0.5'/><Cell N='LocPinY' V='0.09704724409448819' F='Height*0.5'/><Cell N='Angle' V='0'/><Cell N='FlipX' V='0'/><Cell N='FlipY' V='0'/><Cell N='ResizeMode' V='0'/><Cell N='ImgOffsetX' V='0' F='ImgWidth*0'/><Cell N='ImgOffsetY' V='0' F='ImgHeight*0'/><Cell N='ImgWidth' V='0.3468503937007874' F='Width*1'/><Cell N='ImgHeight' V='0.1940944881889764' F='Height*1'/><Cell N='ClippingPath' V='' F='No Formula' E='#N/A'/><Cell N='TxtPinX' V='0.1734251968503937' F='Width*0.5'/><Cell N='TxtPinY' V='0' F='Height*0'/><Cell N='TxtWidth' V='0.3468503937007874' F='Width*1'/><Cell N='TxtHeight' V='0' F='Height*0'/><Cell N='TxtLocPinX' V='0.1734251968503937' F='TxtWidth*0.5'/><Cell N='TxtLocPinY' V='0' F='TxtHeight*0.5'/><Cell N='TxtAngle' V='0'/><Cell N='VerticalAlign' V='0'/><Cell N='ShapeShdwShow' V='2'/><Section N='Geometry' IX='0'><Cell N='NoFill' V='0'/><Cell N='NoLine' V='0'/><Cell N='NoShow' V='0'/><Cell N='NoSnap' V='0'/><Cell N='NoQuickDrag' V='0'/><Row T='RelMoveTo' IX='1'><Cell N='X' V='0'/><Cell N='Y' V='0'/></Row><Row T='RelLineTo' IX='2'><Cell N='X' V='1'/><Cell N='Y' V='0'/></Row><Row T='RelLineTo' IX='3'><Cell N='X' V='1'/><Cell N='Y' V='1'/></Row><Row T='RelLineTo' IX='4'><Cell N='X' V='0'/><Cell N='Y' V='1'/></Row><Row T='RelLineTo' IX='5'><Cell N='X' V='0'/><Cell N='Y' V='0'/></Row></Section><ForeignData ForeignType='Object' ObjectType='33280' ShowAsIcon='0' ObjectWidth='0.34685039370079' ObjectHeight='0.19409448818898'><Rel r:id='rId15'/></ForeignData></Shape><Shape ID='302' Type='Foreign' LineStyle='2' FillStyle='2' TextStyle='2'><Cell N='PinX' V='5.623207873791105'/><Cell N='PinY' V='3.471456793430863'/><Cell N='Width' V='0.2637795275590552'/><Cell N='Height' V='0.25'/><Cell N='LocPinX' V='0.1318897637795276' F='Width*0.5'/><Cell N='LocPinY' V='0.125' F='Height*0.5'/><Cell N='Angle' V='0'/><Cell N='FlipX' V='0'/><Cell N='FlipY' V='0'/><Cell N='ResizeMode' V='0'/><Cell N='ImgOffsetX' V='0' F='ImgWidth*0'/><Cell N='ImgOffsetY' V='0' F='ImgHeight*0'/><Cell N='ImgWidth' V='0.2637795275590552' F='Width*1'/><Cell N='ImgHeight' V='0.25' F='Height*1'/><Cell N='ClippingPath' V='' F='No Formula' E='#N/A'/><Cell N='TxtPinX' V='0.1318897637795276' F='Width*0.5'/><Cell N='TxtPinY' V='0' F='Height*0'/><Cell N='TxtWidth' V='0.2637795275590552' F='Width*1'/><Cell N='TxtHeight' V='0' F='Height*0'/><Cell N='TxtLocPinX' V='0.1318897637795276' F='TxtWidth*0.5'/><Cell N='TxtLocPinY' V='0' F='TxtHeight*0.5'/><Cell N='TxtAngle' V='0'/><Cell N='VerticalAlign' V='0'/><Cell N='ShapeShdwShow' V='2'/><Section N='Geometry' IX='0'><Cell N='NoFill' V='0'/><Cell N='NoLine' V='0'/><Cell N='NoShow' V='0'/><Cell N='NoSnap' V='0'/><Cell N='NoQuickDrag' V='0'/><Row T='RelMoveTo' IX='1'><Cell N='X' V='0'/><Cell N='Y' V='0'/></Row><Row T='RelLineTo' IX='2'><Cell N='X' V='1'/><Cell N='Y' V='0'/></Row><Row T='RelLineTo' IX='3'><Cell N='X' V='1'/><Cell N='Y' V='1'/></Row><Row T='RelLineTo' IX='4'><Cell N='X' V='0'/><Cell N='Y' V='1'/></Row><Row T='RelLineTo' IX='5'><Cell N='X' V='0'/><Cell N='Y' V='0'/></Row></Section><ForeignData ForeignType='Object' ObjectType='33280' ShowAsIcon='0' ObjectWidth='0.26377952755906' ObjectHeight='0.25'><Rel r:id='rId17'/></ForeignData></Shape><Shape ID='303' NameU='Circle.206' Name='圆形.206' Type='Shape' Master='9'><Cell N='PinX' V='7.526751215390759'/><Cell N='PinY' V='5.313326940634936'/><Cell N='Width' V='0.2532677165354331'/><Cell N='Height' V='0.2532677165354331'/><Cell N='LocPinX' V='0.1266338582677165' F='Inh'/><Cell N='LocPinY' V='0.1266338582677165' F='Inh'/><Cell N='TxtPinX' V='0.1266338582677165' F='Inh'/><Cell N='TxtPinY' V='0.1266338582677165' F='Inh'/><Cell N='TxtWidth' V='0.2216092519685039' F='Inh'/><Cell N='TxtHeight' V='0.1899507874015748' F='Inh'/><Cell N='TxtLocPinX' V='0.110804625984252' F='Inh'/><Cell N='TxtLocPinY' V='0.09497539370078739' F='Inh'/><Cell N='ObjType' V='1'/><Cell N='ShapeShdwShow' V='2'/><Section N='Connection'><Row T='Connection' IX='0'><Cell N='X' V='0.1266338582677165' F='Inh'/><Cell N='Y' V='0.2532677165354331' F='Inh'/></Row><Row T='Connection' IX='1'><Cell N='X' V='0.1266338582677165' F='Inh'/><Cell N='Y' V='0.1266338582677165' F='Inh'/></Row><Row T='Connection' IX='2'><Cell N='Y' V='0.1266338582677165' F='Inh'/></Row><Row T='Connection' IX='3'><Cell N='X' V='0.1266338582677165' F='Inh'/></Row><Row T='Connection' IX='4'><Cell N='X' V='0.2532677165354331' F='Inh'/><Cell N='Y' V='0.1266338582677165' F='Inh'/></Row><Row T='Connection' IX='5'><Cell N='X' V='0.0370783937007874' F='Inh'/><Cell N='Y' V='0.0370783937007874' F='Inh'/></Row><Row T='Connection' IX='6'><Cell N='X' V='0.2161893228346457' F='Inh'/><Cell N='Y' V='0.0370783937007874' F='Inh'/></Row><Row T='Connection' IX='7'><Cell N='X' V='0.2161893228346457' F='Inh'/><Cell N='Y' V='0.2161893228346457' F='Inh'/></Row><Row T='Connection' IX='8'><Cell N='X' V='0.0370783937007874' F='Inh'/><Cell N='Y' V='0.2161893228346457' F='Inh'/></Row></Section><Section N='Geometry' IX='0'><Row T='MoveTo' IX='1'><Cell N='Y' V='0.1266338582677165' F='Inh'/></Row><Row T='EllipticalArcTo' IX='2'><Cell N='X' V='0.2532677165354331' F='Inh'/><Cell N='Y' V='0.1266338582677165' F='Inh'/><Cell N='A' V='0.1266338582677165' U='DL' F='Inh'/><Cell N='B' V='0.2532677165354331' U='DL' F='Inh'/></Row><Row T='EllipticalArcTo' IX='3'><Cell N='Y' V='0.1266338582677165' F='Inh'/><Cell N='A' V='0.1266338582677165' U='DL' F='Inh'/></Row></Section></Shape><Shape ID='304' Type='Foreign' LineStyle='2' FillStyle='2' TextStyle='2'><Cell N='PinX' V='7.528385073658476'/><Cell N='PinY' V='5.306250352286451'/><Cell N='Width' V='0.25'/><Cell N='Height' V='0.25'/><Cell N='LocPinX' V='0.125' F='Width*0.5'/><Cell N='LocPinY' V='0.125' F='Height*0.5'/><Cell N='Angle' V='0'/><Cell N='FlipX' V='0'/><Cell N='FlipY' V='0'/><Cell N='ResizeMode' V='0'/><Cell N='ImgOffsetX' V='0' F='ImgWidth*0'/><Cell N='ImgOffsetY' V='0' F='ImgHeight*0'/><Cell N='ImgWidth' V='0.25' F='Width*1'/><Cell N='ImgHeight' V='0.25' F='Height*1'/><Cell N='ClippingPath' V='' F='No Formula' E='#N/A'/><Cell N='TxtPinX' V='0.125' F='Width*0.5'/><Cell N='TxtPinY' V='0' F='Height*0'/><Cell N='TxtWidth' V='0.25' F='Width*1'/><Cell N='TxtHeight' V='0' F='Height*0'/><Cell N='TxtLocPinX' V='0.125' F='TxtWidth*0.5'/><Cell N='TxtLocPinY' V='0' F='TxtHeight*0.5'/><Cell N='TxtAngle' V='0'/><Cell N='VerticalAlign' V='0'/><Cell N='ObjType' V='1'/><Cell N='ShapeShdwShow' V='2'/><Section N='Geometry' IX='0'><Cell N='NoFill' V='0'/><Cell N='NoLine' V='0'/><Cell N='NoShow' V='0'/><Cell N='NoSnap' V='0'/><Cell N='NoQuickDrag' V='0'/><Row T='RelMoveTo' IX='1'><Cell N='X' V='0'/><Cell N='Y' V='0'/></Row><Row T='RelLineTo' IX='2'><Cell N='X' V='1'/><Cell N='Y' V='0'/></Row><Row T='RelLineTo' IX='3'><Cell N='X' V='1'/><Cell N='Y' V='1'/></Row><Row T='RelLineTo' IX='4'><Cell N='X' V='0'/><Cell N='Y' V='1'/></Row><Row T='RelLineTo' IX='5'><Cell N='X' V='0'/><Cell N='Y' V='0'/></Row></Section><ForeignData ForeignType='Object' ObjectType='33280' ShowAsIcon='0' ObjectWidth='0.25' ObjectHeight='0.25'><Rel r:id='rId18'/></ForeignData></Shape></Shapes><Connects><Connect FromSheet='294' FromCell='BeginX' FromPart='9' ToSheet='286' ToCell='Connections.X3' ToPart='102'/><Connect FromSheet='293' FromCell='EndX' FromPart='12' ToSheet='283' ToCell='Connections.X1' ToPart='100'/><Connect FromSheet='292' FromCell='EndX' FromPart='12' ToSheet='282' ToCell='Connections.X1' ToPart='100'/><Connect FromSheet='291' FromCell='EndX' FromPart='12' ToSheet='281' ToCell='Connections.X1' ToPart='100'/><Connect FromSheet='289' FromCell='EndX' FromPart='12' ToSheet='296' ToCell='Connections.X1' ToPart='100'/><Connect FromSheet='288' FromCell='EndX' FromPart='12' ToSheet='286' ToCell='Connections.X1' ToPart='100'/><Connect FromSheet='288' FromCell='BeginX' FromPart='9' ToSheet='271' ToCell='Connections.X1' ToPart='100'/><Connect FromSheet='287' FromCell='EndX' FromPart='12' ToSheet='271' ToCell='Connections.X3' ToPart='102'/><Connect FromSheet='287' FromCell='BeginX' FromPart='9' ToSheet='283' ToCell='Connections.X3' ToPart='102'/><Connect FromSheet='285' FromCell='EndX' FromPart='12' ToSheet='275' ToCell='Connections.X4' ToPart='103'/><Connect FromSheet='285' FromCell='BeginX' FromPart='9' ToSheet='282' ToCell='Connections.X3' ToPart='102'/><Connect FromSheet='284' FromCell='EndX' FromPart='12' ToSheet='275' ToCell='Connections.X3' ToPart='102'/><Connect FromSheet='284' FromCell='BeginX' FromPart='9' ToSheet='281' ToCell='Connections.X3' ToPart='102'/><Connect FromSheet='280' FromCell='EndX' FromPart='12' ToSheet='261' ToCell='Connections.X4' ToPart='103'/><Connect FromSheet='280' FromCell='BeginX' FromPart='9' ToSheet='279' ToCell='Connections.X3' ToPart='102'/><Connect FromSheet='278' FromCell='EndX' FromPart='12' ToSheet='266' ToCell='Connections.X4' ToPart='103'/><Connect FromSheet='278' FromCell='BeginX' FromPart='9' ToSheet='275' ToCell='Connections.X1' ToPart='100'/><Connect FromSheet='277' FromCell='EndX' FromPart='12' ToSheet='275' ToCell='Connections.X7' ToPart='106'/><Connect FromSheet='277' FromCell='BeginX' FromPart='9' ToSheet='275' ToCell='Connections.X9' ToPart='108'/><Connect FromSheet='276' FromCell='EndX' FromPart='12' ToSheet='275' ToCell='Connections.X8' ToPart='107'/><Connect FromSheet='276' FromCell='BeginX' FromPart='9' ToSheet='275' ToCell='Connections.X6' ToPart='105'/><Connect FromSheet='273' FromCell='EndX' FromPart='12' ToSheet='271' ToCell='Connections.X7' ToPart='106'/><Connect FromSheet='273' FromCell='BeginX' FromPart='9' ToSheet='271' ToCell='Connections.X9' ToPart='108'/><Connect FromSheet='272' FromCell='EndX' FromPart='12' ToSheet='271' ToCell='Connections.X8' ToPart='107'/><Connect FromSheet='272' FromCell='BeginX' FromPart='9' ToSheet='271' ToCell='Connections.X6' ToPart='105'/><Connect FromSheet='269' FromCell='BeginX' FromPart='9' ToSheet='266' ToCell='Connections.X5' ToPart='104'/><Connect FromSheet='268' FromCell='EndX' FromPart='12' ToSheet='266' ToCell='Connections.X7' ToPart='106'/><Connect FromSheet='268' FromCell='BeginX' FromPart='9' ToSheet='266' ToCell='Connections.X9' ToPart='108'/><Connect FromSheet='267' FromCell='EndX' FromPart='12' ToSheet='266' ToCell='Connections.X8' ToPart='107'/><Connect FromSheet='267' FromCell='BeginX' FromPart='9' ToSheet='266' ToCell='Connections.X6' ToPart='105'/><Connect FromSheet='264' FromCell='EndX' FromPart='12' ToSheet='266' ToCell='Connections.X3' ToPart='102'/><Connect FromSheet='264' FromCell='BeginX' FromPart='9' ToSheet='261' ToCell='Connections.X5' ToPart='104'/><Connect FromSheet='263' FromCell='EndX' FromPart='12' ToSheet='261' ToCell='Connections.X7' ToPart='106'/><Connect FromSheet='263' FromCell='BeginX' FromPart='9' ToSheet='261' ToCell='Connections.X9' ToPart='108'/><Connect FromSheet='262' FromCell='EndX' FromPart='12' ToSheet='261' ToCell='Connections.X8' ToPart='107'/><Connect FromSheet='262' FromCell='BeginX' FromPart='9' ToSheet='261' ToCell='Connections.X6' ToPart='105'/><Connect FromSheet='259' FromCell='BeginX' FromPart='9' ToSheet='271' ToCell='Connections.X4' ToPart='103'/><Connect FromSheet='258' FromCell='EndX' FromPart='12' ToSheet='261' ToCell='Connections.X3' ToPart='102'/><Connect FromSheet='239' FromCell='BeginX' FromPart='9' ToSheet='231' ToCell='Connections.X3' ToPart='102'/><Connect FromSheet='238' FromCell='EndX' FromPart='12' ToSheet='228' ToCell='Connections.X1' ToPart='100'/><Connect FromSheet='237' FromCell='EndX' FromPart='12' ToSheet='227' ToCell='Connections.X1' ToPart='100'/><Connect FromSheet='236' FromCell='EndX' FromPart='12' ToSheet='226' ToCell='Connections.X1' ToPart='100'/><Connect FromSheet='234' FromCell='EndX' FromPart='12' ToSheet='241' ToCell='Connections.X1' ToPart='100'/><Connect FromSheet='233' FromCell='EndX' FromPart='12' ToSheet='231' ToCell='Connections.X1' ToPart='100'/><Connect FromSheet='233' FromCell='BeginX' FromPart='9' ToSheet='216' ToCell='Connections.X1' ToPart='100'/><Connect FromSheet='232' FromCell='EndX' FromPart='12' ToSheet='216' ToCell='Connections.X3' ToPart='102'/><Connect FromSheet='232' FromCell='BeginX' FromPart='9' ToSheet='228' ToCell='Connections.X3' ToPart='102'/><Connect FromSheet='230' FromCell='EndX' FromPart='12' ToSheet='220' ToCell='Connections.X4' ToPart='103'/><Connect FromSheet='230' FromCell='BeginX' FromPart='9' ToSheet='227' ToCell='Connections.X3' ToPart='102'/><Connect FromSheet='229' FromCell='EndX' FromPart='12' ToSheet='220' ToCell='Connections.X3' ToPart='102'/><Connect FromSheet='229' FromCell='BeginX' FromPart='9' ToSheet='226' ToCell='Connections.X3' ToPart='102'/><Connect FromSheet='160' FromCell='EndX' FromPart='12' ToSheet='162' ToCell='Connections.X3' ToPart='102'/><Connect FromSheet='160' FromCell='BeginX' FromPart='9' ToSheet='157' ToCell='Connections.X5' ToPart='104'/><Connect FromSheet='159' FromCell='EndX' FromPart='12' ToSheet='157' ToCell='Connections.X7' ToPart='106'/><Connect FromSheet='159' FromCell='BeginX' FromPart='9' ToSheet='157' ToCell='Connections.X9' ToPart='108'/><Connect FromSheet='158' FromCell='EndX' FromPart='12' ToSheet='157' ToCell='Connections.X8' ToPart='107'/><Connect FromSheet='158' FromCell='BeginX' FromPart='9' ToSheet='157' ToCell='Connections.X6' ToPart='105'/><Connect FromSheet='155' FromCell='BeginX' FromPart='9' ToSheet='167' ToCell='Connections.X4' ToPart='103'/><Connect FromSheet='154' FromCell='EndX' FromPart='12' ToSheet='157' ToCell='Connections.X3' ToPart='102'/><Connect FromSheet='163' FromCell='BeginX' FromPart='9' ToSheet='162' ToCell='Connections.X6' ToPart='105'/><Connect FromSheet='163' FromCell='EndX' FromPart='12' ToSheet='162' ToCell='Connections.X8' ToPart='107'/><Connect FromSheet='164' FromCell='BeginX' FromPart='9' ToSheet='162' ToCell='Connections.X9' ToPart='108'/><Connect FromSheet='164' FromCell='EndX' FromPart='12' ToSheet='162' ToCell='Connections.X7' ToPart='106'/><Connect FromSheet='165' FromCell='BeginX' FromPart='9' ToSheet='162' ToCell='Connections.X5' ToPart='104'/><Connect FromSheet='168' FromCell='BeginX' FromPart='9' ToSheet='167' ToCell='Connections.X6' ToPart='105'/><Connect FromSheet='168' FromCell='EndX' FromPart='12' ToSheet='167' ToCell='Connections.X8' ToPart='107'/><Connect FromSheet='169' FromCell='BeginX' FromPart='9' ToSheet='167' ToCell='Connections.X9' ToPart='108'/><Connect FromSheet='169' FromCell='EndX' FromPart='12' ToSheet='167' ToCell='Connections.X7' ToPart='106'/><Connect FromSheet='172' FromCell='BeginX' FromPart='9' ToSheet='171' ToCell='Connections.X6' ToPart='105'/><Connect FromSheet='172' FromCell='EndX' FromPart='12' ToSheet='171' ToCell='Connections.X8' ToPart='107'/><Connect FromSheet='173' FromCell='BeginX' FromPart='9' ToSheet='171' ToCell='Connections.X9' ToPart='108'/><Connect FromSheet='173' FromCell='EndX' FromPart='12' ToSheet='171' ToCell='Connections.X7' ToPart='106'/><Connect FromSheet='174' FromCell='BeginX' FromPart='9' ToSheet='171' ToCell='Connections.X1' ToPart='100'/><Connect FromSheet='174' FromCell='EndX' FromPart='12' ToSheet='162' ToCell='Connections.X4' ToPart='103'/><Connect FromSheet='176' FromCell='BeginX' FromPart='9' ToSheet='175' ToCell='Connections.X3' ToPart='102'/><Connect FromSheet='176' FromCell='EndX' FromPart='12' ToSheet='157' ToCell='Connections.X4' ToPart='103'/><Connect FromSheet='180' FromCell='BeginX' FromPart='9' ToSheet='177' ToCell='Connections.X3' ToPart='102'/><Connect FromSheet='180' FromCell='EndX' FromPart='12' ToSheet='171' ToCell='Connections.X3' ToPart='102'/><Connect FromSheet='181' FromCell='BeginX' FromPart='9' ToSheet='178' ToCell='Connections.X3' ToPart='102'/><Connect FromSheet='181' FromCell='EndX' FromPart='12' ToSheet='171' ToCell='Connections.X4' ToPart='103'/><Connect FromSheet='183' FromCell='BeginX' FromPart='9' ToSheet='179' ToCell='Connections.X3' ToPart='102'/><Connect FromSheet='183' FromCell='EndX' FromPart='12' ToSheet='167' ToCell='Connections.X3' ToPart='102'/><Connect FromSheet='184' FromCell='BeginX' FromPart='9' ToSheet='167' ToCell='Connections.X1' ToPart='100'/><Connect FromSheet='184' FromCell='EndX' FromPart='12' ToSheet='182' ToCell='Connections.X1' ToPart='100'/><Connect FromSheet='185' FromCell='EndX' FromPart='12' ToSheet='192' ToCell='Connections.X1' ToPart='100'/><Connect FromSheet='187' FromCell='EndX' FromPart='12' ToSheet='177' ToCell='Connections.X1' ToPart='100'/><Connect FromSheet='188' FromCell='EndX' FromPart='12' ToSheet='178' ToCell='Connections.X1' ToPart='100'/><Connect FromSheet='189' FromCell='EndX' FromPart='12' ToSheet='179' ToCell='Connections.X1' ToPart='100'/><Connect FromSheet='190' FromCell='BeginX' FromPart='9' ToSheet='182' ToCell='Connections.X3' ToPart='102'/><Connect FromSheet='203' FromCell='EndX' FromPart='12' ToSheet='206' ToCell='Connections.X3' ToPart='102'/><Connect FromSheet='204' FromCell='BeginX' FromPart='9' ToSheet='216' ToCell='Connections.X4' ToPart='103'/><Connect FromSheet='207' FromCell='BeginX' FromPart='9' ToSheet='206' ToCell='Connections.X6' ToPart='105'/><Connect FromSheet='207' FromCell='EndX' FromPart='12' ToSheet='206' ToCell='Connections.X8' ToPart='107'/><Connect FromSheet='208' FromCell='BeginX' FromPart='9' ToSheet='206' ToCell='Connections.X9' ToPart='108'/><Connect FromSheet='208' FromCell='EndX' FromPart='12' ToSheet='206' ToCell='Connections.X7' ToPart='106'/><Connect FromSheet='209' FromCell='BeginX' FromPart='9' ToSheet='206' ToCell='Connections.X5' ToPart='104'/><Connect FromSheet='209' FromCell='EndX' FromPart='12' ToSheet='211' ToCell='Connections.X3' ToPart='102'/><Connect FromSheet='212' FromCell='BeginX' FromPart='9' ToSheet='211' ToCell='Connections.X6' ToPart='105'/><Connect FromSheet='212' FromCell='EndX' FromPart='12' ToSheet='211' ToCell='Connections.X8' ToPart='107'/><Connect FromSheet='213' FromCell='BeginX' FromPart='9' ToSheet='211' ToCell='Connections.X9' ToPart='108'/><Connect FromSheet='213' FromCell='EndX' FromPart='12' ToSheet='211' ToCell='Connections.X7' ToPart='106'/><Connect FromSheet='214' FromCell='BeginX' FromPart='9' ToSheet='211' ToCell='Connections.X5' ToPart='104'/><Connect FromSheet='217' FromCell='BeginX' FromPart='9' ToSheet='216' ToCell='Connections.X6' ToPart='105'/><Connect FromSheet='217' FromCell='EndX' FromPart='12' ToSheet='216' ToCell='Connections.X8' ToPart='107'/><Connect FromSheet='218' FromCell='BeginX' FromPart='9' ToSheet='216' ToCell='Connections.X9' ToPart='108'/><Connect FromSheet='218' FromCell='EndX' FromPart='12' ToSheet='216' ToCell='Connections.X7' ToPart='106'/><Connect FromSheet='221' FromCell='BeginX' FromPart='9' ToSheet='220' ToCell='Connections.X6' ToPart='105'/><Connect FromSheet='221' FromCell='EndX' FromPart='12' ToSheet='220' ToCell='Connections.X8' ToPart='107'/><Connect FromSheet='222' FromCell='BeginX' FromPart='9' ToSheet='220' ToCell='Connections.X9' ToPart='108'/><Connect FromSheet='222' FromCell='EndX' FromPart='12' ToSheet='220' ToCell='Connections.X7' ToPart='106'/><Connect FromSheet='223' FromCell='BeginX' FromPart='9' ToSheet='220' ToCell='Connections.X1' ToPart='100'/><Connect FromSheet='223' FromCell='EndX' FromPart='12' ToSheet='211' ToCell='Connections.X4' ToPart='103'/><Connect FromSheet='225' FromCell='BeginX' FromPart='9' ToSheet='224' ToCell='Connections.X3' ToPart='102'/><Connect FromSheet='225' FromCell='EndX' FromPart='12' ToSheet='206' ToCell='Connections.X4' ToPart='103'/><Connect FromSheet='295' FromCell='EndX' FromPart='12' ToSheet='304' ToCell='PinX' ToPart='3'/><Connect FromSheet='240' FromCell='EndX' FromPart='12' ToSheet='249' ToCell='PinX' ToPart='3'/><Connect FromSheet='191' FromCell='EndX' FromPart='12' ToSheet='200' ToCell='PinX' ToPart='3'/></Connects></PageContents>
